# Supplementary material for: Rational design of hydrocarbon-based sulfonated copolymers for proton exchange membranes
Source: Royal Society of Chemistry journal article supplement (doi:10.1039/c9ta00688e), 2019-01-01
Supplement: c9ta00688e1.xlsx [file c9ta00688e1.xlsx]

## Sheet: sigma
	CoPID	hydrophilic	hydrophobic	ratioLic	sigmaRFPre
247927	CoPID247927	O=C(C1=CC=C(OC2=CC=C(S(=O)(O)=O)C=C2)C=C1)C3=CC=CC=C3	O=C(NC1=O)C2=CC=C3C4=C2C1=CC=C4C(N(CCCCCCCCCC)C3=O)=O	0.9	24.8171
217609	CoPID217609	O=C(C1=CC=C(OC2=CC(C3=CC(OC)=C(S(=O)(O)=O)C=C3)=C(O)C=C2)C=C1)C4=CC=CC=C4	O=C(C1=CC=C(OC2=CC=C(C(C)(C)C3=CC=C(O)C=C3)C=C2)C=C1)C4=CC=CC=C4	0.8	24.4361
247935	CoPID247935	O=C(C1=CC=C(OC2=CC=C(S(=O)(O)=O)C=C2)C=C1)C3=CC=CC=C3	O=C(C1=CC=CC=C1)C2=CC=CC=C2	0.9	24.401
247965	CoPID247965	O=C(C1=CC=C(OC2=CC=C(S(=O)(O)=O)C=C2)C=C1)C3=CC=CC=C3	SC(C=C1)=CC=C1SC(C=C2)=CC=C2SC3=C(C#N)C=CC=C3	0.9	24.329
247901	CoPID247901	O=C(C1=CC=C(OC2=CC=C(S(=O)(O)=O)C=C2)C=C1)C3=CC=CC=C3	O=C(NC1=O)C2=CC=C3C4=C2C1=CC=C4C(N(C5=NC=NN5)C3=O)=O	0.9	24.3274
247852	CoPID247852	O=C(C1=CC=C(OC2=CC=C(S(=O)(O)=O)C=C2)C=C1)C3=CC=CC=C3	O=C1N(C2=CC=CC=C2C(F)(F)F)C(C3=CC=CC4=C3C1=CC=C4)=O	0.9	24.3009
247916	CoPID247916	O=C(C1=CC=C(OC2=CC=C(S(=O)(O)=O)C=C2)C=C1)C3=CC=CC=C3	O=C(C1=CC=CC=C1)C2=CC=C(C(C3=CC=CC=C3)=O)C=C2	0.9	24.2867
247964	CoPID247964	O=C(C1=CC=C(OC2=CC=C(S(=O)(O)=O)C=C2)C=C1)C3=CC=CC=C3	SC1=CC(C=C2)=C(C=C1)C=C2SC3=C(C#N)C=CC=C3	0.9	24.2786
247856	CoPID247856	O=C(C1=CC=C(OC2=CC=C(S(=O)(O)=O)C=C2)C=C1)C3=CC=CC=C3	CC(C1=CC=CC=C1)(C(F)(F)F)C2=CC=C(C3=NC4=C(C=C(N=CS5)C5=C4)S3)C=C2	0.9	24.1793
247816	CoPID247816	O=C(C1=CC=C(OC2=CC=C(S(=O)(O)=O)C=C2)C=C1)C3=CC=CC=C3	FC(C(C1=CC=C(C2=NC3=C(C=C(N=CS4)C4=C3)S2)C=C1)(C(F)(F)F)C5=CC=CC=C5)(F)F	0.9	24.1706
247934	CoPID247934	O=C(C1=CC=C(OC2=CC=C(S(=O)(O)=O)C=C2)C=C1)C3=CC=CC=C3	O=C(C1=C2C(C=CC=C23)=CC=C1)N(C4=CC=CC(C(C5=CC=CC=C5)=O)=C4)C3=O	0.9	24.1655
247926	CoPID247926	O=C(C1=CC=C(OC2=CC=C(S(=O)(O)=O)C=C2)C=C1)C3=CC=CC=C3	O=S(C1=CC=C(S(=O)(O)=O)C=C1)(O)=O	0.9	24.1603
247862	CoPID247862	O=C(C1=CC=C(OC2=CC=C(S(=O)(O)=O)C=C2)C=C1)C3=CC=CC=C3	O=C(C1=CC=CC=C1)C(C=C2)=CC=C2OC(C(C)=C3)=C(C)C=C3C4=CC(C)=C(O)C(C)=C4	0.9	24.0963
247883	CoPID247883	O=C(C1=CC=C(OC2=CC=C(S(=O)(O)=O)C=C2)C=C1)C3=CC=CC=C3	SC1=CC=C(SC2=CC=C(SC3=CC=C(S(C4=CC=CC=C4)(=O)=O)C=C3)C=C2)C=C1	0.9	24.0773
247855	CoPID247855	O=C(C1=CC=C(OC2=CC=C(S(=O)(O)=O)C=C2)C=C1)C3=CC=CC=C3	O=S(C1=C(C2=NC3=C(C=C(N=CS4)C4=C3)S2)C=CC=C1)(C5=CC=CC=C5)=O	0.9	23.9794
247882	CoPID247882	O=C(C1=CC=C(OC2=CC=C(S(=O)(O)=O)C=C2)C=C1)C3=CC=CC=C3	OC(C=C1)=CC=C1C(C)(C)C(C=C2)=CC=C2OC3=CC=C(C(C4=CC=CC=C4)=O)C=C3	0.9	23.9033
247807	CoPID247807	O=C(C1=CC=C(OC2=CC=C(S(=O)(O)=O)C=C2)C=C1)C3=CC=CC=C3	O=C(C1=CC=C(C=C1)F)C2=CC=C(C=C2)OC3=CC=C(C=C3)C(C)(C4=CC=C(C=C4)O)C	0.9	23.9003
247961	CoPID247961	O=C(C1=CC=C(OC2=CC=C(S(=O)(O)=O)C=C2)C=C1)C3=CC=CC=C3	O=CC1=CC=CC(C(NC2=CC=CC(C(C(F)(F)F)(C(F)(F)F)C3=CC=C(N)C=C3)=C2)=O)=C1	0.9	23.857
247873	CoPID247873	O=C(C1=CC=C(OC2=CC=C(S(=O)(O)=O)C=C2)C=C1)C3=CC=CC=C3	CCC1=CC=C(OCCCC)C=C1	0.9	23.8483
153941	CoPID153941	O=C(C1=CC(S(=O)(O)=O)=CC=C1)C2=CC=CC=C2	O=C(C1=CC=CC=C1)C2=CC=C(C(C3=CC=CC=C3)=O)C=C2	0.6	23.7792
247972	CoPID247972	O=C(C1=CC=C(OC2=CC=C(S(=O)(O)=O)C=C2)C=C1)C3=CC=CC=C3	O=C(C1=CC=C(C2=CC=C(OC3=CC=CC=C3)C=C2)C=C1)C4=CC=CC=C4	0.9	23.7787
247945	CoPID247945	O=C(C1=CC=C(OC2=CC=C(S(=O)(O)=O)C=C2)C=C1)C3=CC=CC=C3	OC1=CC=C(C2=CC=C(C3=CC=CC=C3C#N)C=C2)C=C1	0.9	23.6637
247973	CoPID247973	O=C(C1=CC=C(OC2=CC=C(S(=O)(O)=O)C=C2)C=C1)C3=CC=CC=C3	N#CC1=C(C2=CC=C(OC3=CC=CC=C3)C=C2)C=CC=C1	0.9	23.636
247975	CoPID247975	O=C(C1=CC=C(OC2=CC=C(S(=O)(O)=O)C=C2)C=C1)C3=CC=CC=C3	CCCCCCN(C1=O)C(C2=CC=CC(C2=C1C=C3)=C3C4=C5C(C6=CC=C5)=C(C(NC6=O)=O)C=C4)=O	0.9	23.5777
153918	CoPID153918	O=C(C1=CC(S(=O)(O)=O)=CC=C1)C2=CC=CC=C2	O=C(C1=CC=C(CCC)C=C1)C2=CC=CC=C2	0.6	23.5437
241030	CoPID241030	O=C(C1=CC(S(=O)(O)=O)=CC=C1)C2=CC=CC=C2	O=S(C1=C(C2=NC3=C(C=C(N=CS4)C4=C3)S2)C=CC=C1)(C5=CC=CC=C5)=O	0.9	23.4445
247907	CoPID247907	O=C(C1=CC=C(OC2=CC=C(S(=O)(O)=O)C=C2)C=C1)C3=CC=CC=C3	O=S(C1=CC=C(O)C=C1)(C2=CC=C(OC3=CC=C(C=CC=C4)C4=C3)C=C2)=O	0.9	23.4343
247929	CoPID247929	O=C(C1=CC=C(OC2=CC=C(S(=O)(O)=O)C=C2)C=C1)C3=CC=CC=C3	OC1=CC=C(S(C2=CC=C(OC3=CC=C(C4=CC=CC=C4)C=C3)C=C2)(=O)=O)C=C1	0.9	23.434
247871	CoPID247871	O=C(C1=CC=C(OC2=CC=C(S(=O)(O)=O)C=C2)C=C1)C3=CC=CC=C3	O=S(C1=CC=CC=C1)(C2=CC=C(OC3=CC=C(O)C(C(C)(C)C)=C3)C=C2)=O	0.9	23.4253
247854	CoPID247854	O=C(C1=CC=C(OC2=CC=C(S(=O)(O)=O)C=C2)C=C1)C3=CC=CC=C3	CC(C)(C1=CC=C(OC2=CC=C(S(C3=CC=CC=C3)(=O)=O)C=C2)C=C1)C4=CC=C(O)C=C4	0.9	23.4084
247913	CoPID247913	O=C(C1=CC=C(OC2=CC=C(S(=O)(O)=O)C=C2)C=C1)C3=CC=CC=C3	OC(C=C1)=CC=C1C(C=C2)=CC=C2OC3=C(C#N)C=CC=C3	0.9	23.408
241139	CoPID241139	O=C(C1=CC(S(=O)(O)=O)=CC=C1)C2=CC=CC=C2	SC1=CC(C=C2)=C(C=C1)C=C2SC3=C(C#N)C=CC=C3	0.9	23.3602
247940	CoPID247940	O=C(C1=CC=C(OC2=CC=C(S(=O)(O)=O)C=C2)C=C1)C3=CC=CC=C3	O=S(C1=CC=C(O)C=C1)(C2=CC=C(OC3=CC=CC=C3)C=C2)=O	0.9	23.3393
241140	CoPID241140	O=C(C1=CC(S(=O)(O)=O)=CC=C1)C2=CC=CC=C2	SC(C=C1)=CC=C1SC(C=C2)=CC=C2SC3=C(C#N)C=CC=C3	0.9	23.3337
217532	CoPID217532	O=C(C1=CC=C(OC2=CC(C3=CC(OC)=C(S(=O)(O)=O)C=C3)=C(O)C=C2)C=C1)C4=CC=CC=C4	O=C(C1=CC=C(C=C1)F)C2=CC=C(C=C2)OC3=CC=C(C=C3)C(C)(C4=CC=C(C=C4)O)C	0.8	23.3285
247928	CoPID247928	O=C(C1=CC=C(OC2=CC=C(S(=O)(O)=O)C=C2)C=C1)C3=CC=CC=C3	OC1=CC=C(C(C(C=C2)=CC=C2OC(C=C3)=CC=C3C(CCC(O)=O)(C)C4=CC=CC=C4)=O)C=C1	0.9	23.3282
247919	CoPID247919	O=C(C1=CC=C(OC2=CC=C(S(=O)(O)=O)C=C2)C=C1)C3=CC=CC=C3	O=S(C1=CC=C(OC2=CC=CC=C2C3=CC=C(F)C=C3)C=C1)(C4=CC=C(O)C=C4)=O	0.9	23.2918
247910	CoPID247910	O=C(C1=CC=C(OC2=CC=C(S(=O)(O)=O)C=C2)C=C1)C3=CC=CC=C3	O=S(C1=CC=CC=C1)(C2=CC=C(OC3=CC=C(O)C(C4=CC=CC=C4)=C3)C=C2)=O	0.9	23.2822
247844	CoPID247844	O=C(C1=CC=C(OC2=CC=C(S(=O)(O)=O)C=C2)C=C1)C3=CC=CC=C3	O=S(C1=CC=CC=C1)(C2=CC=C(OC3=CC=C(C=CC(O)=C4)C4=C3)C=C2)=O	0.9	23.2808
247931	CoPID247931	O=C(C1=CC=C(OC2=CC=C(S(=O)(O)=O)C=C2)C=C1)C3=CC=CC=C3	O=S(C1=CC=CC=C1)(C2=CC=C(OC3=CC=C(C=C(O)C=C4)C4=C3)C=C2)=O	0.9	23.2667
247906	CoPID247906	O=C(C1=CC=C(OC2=CC=C(S(=O)(O)=O)C=C2)C=C1)C3=CC=CC=C3	OC1=CC=CC(OC2=CC=C(C=CC=C3)C3=C2)=C1C#N	0.9	23.2591
241058	CoPID241058	O=C(C1=CC(S(=O)(O)=O)=CC=C1)C2=CC=CC=C2	SC1=CC=C(SC2=CC=C(SC3=CC=C(S(C4=CC=CC=C4)(=O)=O)C=C3)C=C2)C=C1	0.9	23.2547
247850	CoPID247850	O=C(C1=CC=C(OC2=CC=C(S(=O)(O)=O)C=C2)C=C1)C3=CC=CC=C3	O=C(C1=CC=C(C(C2=CC=C(OC3=CC=C(O)C(C(C)(C)C)=C3)C=C2)=O)C=C1)C4=CC=CC=C4	0.9	23.2277
247810	CoPID247810	O=C(C1=CC=C(OC2=CC=C(S(=O)(O)=O)C=C2)C=C1)C3=CC=CC=C3	O=C(C1=CC=C(F)C=C1)C(C=C2)=CC=C2OC(C=C3)=CC=C3C(C(F)(F)F)(C(F)(F)F)C4=CC=CC=C4	0.9	23.2273
247835	CoPID247835	O=C(C1=CC=C(OC2=CC=C(S(=O)(O)=O)C=C2)C=C1)C3=CC=CC=C3	OC1=C(OC2=CC=C(C(C3=CC(C(C4=CC=CC=C4)=O)=CC=C3)=O)C=C2)C=C5C(C6C=CC5C6)=C1	0.9	23.2134
247911	CoPID247911	O=C(C1=CC=C(OC2=CC=C(S(=O)(O)=O)C=C2)C=C1)C3=CC=CC=C3	O=S(C1=CC=CC=C1)(C2=CC=C(OC3=CC=C(O)C=C3)C=C2)=O	0.9	23.2126
247814	CoPID247814	O=C(C1=CC=C(OC2=CC=C(S(=O)(O)=O)C=C2)C=C1)C3=CC=CC=C3	O=S(C(C=C1)=CC=C1OC(C=C2)=CC=C2C3=CC=C(O)C=C3)(C4=CC=CC=C4)=O	0.9	23.1987
247840	CoPID247840	O=C(C1=CC=C(OC2=CC=C(S(=O)(O)=O)C=C2)C=C1)C3=CC=CC=C3	O=S(C1=CC=C(O)C=C1)(C2=CC=C(OC3=CC=C(C(C4=CC=CC=C4)=O)C=C3)C=C2)=O	0.9	23.1907
247912	CoPID247912	O=C(C1=CC=C(OC2=CC=C(S(=O)(O)=O)C=C2)C=C1)C3=CC=CC=C3	O=S(C1=CC=CC=C1)(C2=CC=C(OC3=CC=C(O)C(C4=CC=C(F)C=C4)=C3)C=C2)=O	0.9	23.1786
241068	CoPID241068	O=C(C1=CC(S(=O)(O)=O)=CC=C1)C2=CC=CC=C2	O=C(C1=CC=C(CCC)C=C1)C2=CC=CC=C2	0.9	23.1591
247908	CoPID247908	O=C(C1=CC=C(OC2=CC=C(S(=O)(O)=O)C=C2)C=C1)C3=CC=CC=C3	O=P(C1=CC=C(OC2=CC=C(O)C=C2)C=C1)(C3=CC=CC=C3)C4=CC=CC=C4	0.9	23.1379
247805	CoPID247805	O=C(C1=CC=C(OC2=CC=C(S(=O)(O)=O)C=C2)C=C1)C3=CC=CC=C3	O=P(C1=CC=C(SC2=CC=C(SC3=CC=C(S)C=C3)C=C2)C=C1)(C4=CC=CC=C4)C5=CC=CC=C5	0.9	23.134
247920	CoPID247920	O=C(C1=CC=C(OC2=CC=C(S(=O)(O)=O)C=C2)C=C1)C3=CC=CC=C3	OC1=CC=C(S(=O)(C2=CC=C(OC3=CC=C(S(C4=CC=CC=C4)(=O)=O)C=C3)C=C2)=O)C=C1	0.9	23.1223
247902	CoPID247902	O=C(C1=CC=C(OC2=CC=C(S(=O)(O)=O)C=C2)C=C1)C3=CC=CC=C3	OC(C=C1)=CC=C1C(C(F)(F)F)(C(F)(F)F)C(C=C2)=CC=C2OC3=CC=C(C(C4=CC=CC=C4)=O)C=C3	0.9	23.0217
212018	CoPID212018	O=C(C1=CC(S(=O)(O)=O)=CC=C1)C2=CC=CC=C2	O=C(C1=CC=C(CCC)C=C1)C2=CC=CC=C2	0.8	22.9964
247947	CoPID247947	O=C(C1=CC=C(OC2=CC=C(S(=O)(O)=O)C=C2)C=C1)C3=CC=CC=C3	N=P(OC1=CC=C(F)C=C1)OC2=CC=C(OC)C=C2	0.9	22.9658
247879	CoPID247879	O=C(C1=CC=C(OC2=CC=C(S(=O)(O)=O)C=C2)C=C1)C3=CC=CC=C3	O=S(C1=CC=CC=C1)(C2=CC=C(OC3=CC=C(S(=O)(C4=CC=CC=C4)=O)C=C3)C=C2)=O	0.9	22.9592
241069	CoPID241069	O=C(C1=CC(S(=O)(O)=O)=CC=C1)C2=CC=CC=C2	O=C(C1=CC=C(CCCCCCCCCCCC)C=C1)C2=CC=CC=C2	0.9	22.9517
247900	CoPID247900	O=C(C1=CC=C(OC2=CC=C(S(=O)(O)=O)C=C2)C=C1)C3=CC=CC=C3	O=C(NC1=O)C2=CC=C3C4=C2C1=CC=C4C(N(C5=CC6=C(NC7=C6C=C(C)C=C7)C=C5)C3=O)=O	0.9	22.9479
246659	CoPID246659	O=C(C1=CC=C(OC2=CC(C3=CC(OC)=C(S(=O)(O)=O)C=C3)=C(O)C=C2)C=C1)C4=CC=CC=C4	O=C(C1=CC=C(OC2=CC=C(C(C)(C)C3=CC=C(O)C=C3)C=C2)C=C1)C4=CC=CC=C4	0.9	22.9426
247924	CoPID247924	O=C(C1=CC=C(OC2=CC=C(S(=O)(O)=O)C=C2)C=C1)C3=CC=CC=C3	OC1=CC=C(C(C2=CC=C(OC3=CC=C(C(C4=CC=CC=C4)=O)C=C3)C=C2)=O)C=C1	0.9	22.9179
136966	CoPID136966	O=S(C1=CC=CC(C2=CC=CC(S(=O)(O)=O)=C2)=C1)(O)=O	O=C(C1=CC=CC=C1)C2=CC=C(C(C3=CC=CC=C3)=O)C=C2	0.5	22.9112
247830	CoPID247830	O=C(C1=CC=C(OC2=CC=C(S(=O)(O)=O)C=C2)C=C1)C3=CC=CC=C3	O=S(C1=CC=CC=C1C2=NC3=CC=C(C4=CC=C(N=CN5)C5=C4)C=C3N2)(C6=CC=CC=C6)=O	0.9	22.9009
247801	CoPID247801	O=C(C1=CC=C(OC2=CC=C(S(=O)(O)=O)C=C2)C=C1)C3=CC=CC=C3	O=S(C1=CC=CC=C1)(C2=CC=C(OC3=CC=C(O)C(C4=CC(F)=C(F)C=C4)=C3)C=C2)=O	0.9	22.8824
212089	CoPID212089	O=C(C1=CC(S(=O)(O)=O)=CC=C1)C2=CC=CC=C2	SC1=CC(C=C2)=C(C=C1)C=C2SC3=C(C#N)C=CC=C3	0.8	22.8708
247896	CoPID247896	O=C(C1=CC=C(OC2=CC=C(S(=O)(O)=O)C=C2)C=C1)C3=CC=CC=C3	O=C(NC1=O)C2=CC=C3C4=C2C1=CC=C4C(N(C5=CC=C(OC6=CC=CC=C6)C=C5)C3=O)=O	0.9	22.8544
241091	CoPID241091	O=C(C1=CC(S(=O)(O)=O)=CC=C1)C2=CC=CC=C2	O=C(C1=CC=CC=C1)C2=CC=C(C(C3=CC=CC=C3)=O)C=C2	0.9	22.8298
247846	CoPID247846	O=C(C1=CC=C(OC2=CC=C(S(=O)(O)=O)C=C2)C=C1)C3=CC=CC=C3	OC1=CC=C(OC2=CC=C(OC3=CC=C(S(C4=CC=CC=C4)(=O)=O)C=C3)C=C2)C=C1	0.9	22.8116
212041	CoPID212041	O=C(C1=CC(S(=O)(O)=O)=CC=C1)C2=CC=CC=C2	O=C(C1=CC=CC=C1)C2=CC=C(C(C3=CC=CC=C3)=O)C=C2	0.8	22.8113
182991	CoPID182991	O=C(C1=CC(S(=O)(O)=O)=CC=C1)C2=CC=CC=C2	O=C(C1=CC=CC=C1)C2=CC=C(C(C3=CC=CC=C3)=O)C=C2	0.7	22.7651
182968	CoPID182968	O=C(C1=CC(S(=O)(O)=O)=CC=C1)C2=CC=CC=C2	O=C(C1=CC=C(CCC)C=C1)C2=CC=CC=C2	0.7	22.743
78866	CoPID78866	O=S(C1=CC=CC(C2=CC=CC(S(=O)(O)=O)=C2)=C1)(O)=O	O=C(C1=CC=CC=C1)C2=CC=C(C(C3=CC=CC=C3)=O)C=C2	0.3	22.7307
107916	CoPID107916	O=S(C1=CC=CC(C2=CC=CC(S(=O)(O)=O)=C2)=C1)(O)=O	O=C(C1=CC=CC=C1)C2=CC=C(C(C3=CC=CC=C3)=O)C=C2	0.4	22.7271
241031	CoPID241031	O=C(C1=CC(S(=O)(O)=O)=CC=C1)C2=CC=CC=C2	CC(C1=CC=CC=C1)(C(F)(F)F)C2=CC=C(C3=NC4=C(C=C(N=CS5)C5=C4)S3)C=C2	0.9	22.7253
241102	CoPID241102	O=C(C1=CC(S(=O)(O)=O)=CC=C1)C2=CC=CC=C2	O=C(NC1=O)C2=CC=C3C4=C2C1=CC=C4C(N(CCCCCCCCCC)C3=O)=O	0.9	22.7208
211980	CoPID211980	O=C(C1=CC(S(=O)(O)=O)=CC=C1)C2=CC=CC=C2	O=S(C1=C(C2=NC3=C(C=C(N=CS4)C4=C3)S2)C=CC=C1)(C5=CC=CC=C5)=O	0.8	22.7132
247829	CoPID247829	O=C(C1=CC=C(OC2=CC=C(S(=O)(O)=O)C=C2)C=C1)C3=CC=CC=C3	O=S(C(C=C1)=CC=C1C2=NC3=CC=C(C4=CC=C(NC=N5)C5=C4)C=C3N2)(C6=CC=CC=C6)=O	0.9	22.7055
247802	CoPID247802	O=C(C1=CC=C(OC2=CC=C(S(=O)(O)=O)C=C2)C=C1)C3=CC=CC=C3	O=S(C1=CC=C(O)C=C1)(C2=CC=C(OC3=CC=C(C(C(F)(F)F)(C(F)(F)F)C4=CC=CC=C4)C=C3)C=C2)=O	0.9	22.6995
124891	CoPID124891	O=C(C1=CC(S(=O)(O)=O)=CC=C1)C2=CC=CC=C2	O=C(C1=CC=CC=C1)C2=CC=C(C(C3=CC=CC=C3)=O)C=C2	0.5	22.6966
246637	CoPID246637	O=C(C1=CC=C(OC2=CC(C3=CC(OC)=C(S(=O)(O)=O)C=C3)=C(O)C=C2)C=C1)C4=CC=CC=C4	O=C(C1=CC=CC=C1)C(C=C2)=CC=C2OC(C(C)=C3)=C(C)C=C3C4=CC(C)=C(O)C(C)=C4	0.9	22.6897
247831	CoPID247831	O=C(C1=CC=C(OC2=CC=C(S(=O)(O)=O)C=C2)C=C1)C3=CC=CC=C3	OC1=CC=C(C(C(F)(F)F)(C(F)(F)F)C2=CC=C(OC3=CC=C(S(C4=CC=CC=C4)(=O)=O)C=C3)C=C2)C=C1	0.9	22.6682
247971	CoPID247971	O=C(C1=CC=C(OC2=CC=C(S(=O)(O)=O)C=C2)C=C1)C3=CC=CC=C3	OC1=CC=C(C(C2=C(C(O)=O)C=CC=C2)C3=CC=C(OC4=CC=CC=C4C#N)C=C3)C=C1	0.9	22.6578
241147	CoPID241147	O=C(C1=CC(S(=O)(O)=O)=CC=C1)C2=CC=CC=C2	O=C(C1=CC=C(C2=CC=C(OC3=CC=CC=C3)C=C2)C=C1)C4=CC=CC=C4	0.9	22.6544
60316	CoPID60316	O=S(C1=CC=CC=C1)(O)=O	O=C(C1=CC=CC=C1)C2=CC=C(C(C3=CC=CC=C3)=O)C=C2	0.3	22.6455
241076	CoPID241076	O=C(C1=CC(S(=O)(O)=O)=CC=C1)C2=CC=CC=C2	O=C(NC1=O)C2=CC=C3C4=C2C1=CC=C4C(N(C5=NC=NN5)C3=O)=O	0.9	22.6427
156741	CoPID156741	C=C(C1=CC(S(=O)(O)=O)=CC=C1)C2=CC=CC=C2	O=C(C1=CC=CC=C1)C2=CC=C(C(C3=CC=CC=C3)=O)C=C2	0.6	22.6384
247819	CoPID247819	O=C(C1=CC=C(OC2=CC=C(S(=O)(O)=O)C=C2)C=C1)C3=CC=CC=C3	O=CC1=CC=C(OC2=CC=C(C3=NC4=C(C=C(C5=CC(N=CN6)=C6C=C5)C=C4)N3)C=C2)C=C1	0.9	22.6336
247915	CoPID247915	O=C(C1=CC=C(OC2=CC=C(S(=O)(O)=O)C=C2)C=C1)C3=CC=CC=C3	O=C(C1=CC=CC(C=O)=C1)NC(C=C2)=CC=C2OC3=C(C#N)C(OC4=CC=C(N)C=C4)=CC=C3	0.9	22.6209
124868	CoPID124868	O=C(C1=CC(S(=O)(O)=O)=CC=C1)C2=CC=CC=C2	O=C(C1=CC=C(CCC)C=C1)C2=CC=CC=C2	0.5	22.6161
246582	CoPID246582	O=C(C1=CC=C(OC2=CC(C3=CC(OC)=C(S(=O)(O)=O)C=C3)=C(O)C=C2)C=C1)C4=CC=CC=C4	O=C(C1=CC=C(C=C1)F)C2=CC=C(C=C2)OC3=CC=C(C=C3)C(C)(C4=CC=C(C=C4)O)C	0.9	22.6132
241101	CoPID241101	O=C(C1=CC(S(=O)(O)=O)=CC=C1)C2=CC=CC=C2	O=S(C1=CC=C(S(=O)(O)=O)C=C1)(O)=O	0.9	22.6084
247863	CoPID247863	O=C(C1=CC=C(OC2=CC=C(S(=O)(O)=O)C=C2)C=C1)C3=CC=CC=C3	NC1=CC=C(C2(C3=CC=C(NC(CCCCCCC=O)=O)C=C3)C4=CC=CC=C4C5=C2C=CC=C5)C=C1	0.9	22.5836
118416	CoPID118416	O=S(C1=CC=CC=C1)(O)=O	O=C(C1=CC=CC=C1)C2=CC=C(C(C3=CC=CC=C3)=O)C=C2	0.5	22.56
89366	CoPID89366	O=S(C1=CC=CC=C1)(O)=O	O=C(C1=CC=CC=C1)C2=CC=C(C(C3=CC=CC=C3)=O)C=C2	0.4	22.556
247827	CoPID247827	O=C(C1=CC=C(OC2=CC=C(S(=O)(O)=O)C=C2)C=C1)C3=CC=CC=C3	C1(C2=NC3=CC=C(C4=CC=C(NC=N5)C5=C4)C=C3N2)=CC=CC6=C1C=CC=C6	0.9	22.5168
241136	CoPID241136	O=C(C1=CC(S(=O)(O)=O)=CC=C1)C2=CC=CC=C2	O=CC1=CC=CC(C(NC2=CC=CC(C(C(F)(F)F)(C(F)(F)F)C3=CC=C(N)C=C3)=C2)=O)=C1	0.9	22.5073
147466	CoPID147466	O=S(C1=CC=CC=C1)(O)=O	O=C(C1=CC=CC=C1)C2=CC=C(C(C3=CC=CC=C3)=O)C=C2	0.6	22.507
241057	CoPID241057	O=C(C1=CC(S(=O)(O)=O)=CC=C1)C2=CC=CC=C2	OC(C=C1)=CC=C1C(C)(C)C(C=C2)=CC=C2OC3=CC=C(C(C4=CC=CC=C4)=O)C=C3	0.9	22.5069
241148	CoPID241148	O=C(C1=CC(S(=O)(O)=O)=CC=C1)C2=CC=CC=C2	N#CC1=C(C2=CC=C(OC3=CC=CC=C3)C=C2)C=CC=C1	0.9	22.4901
247885	CoPID247885	O=C(C1=CC=C(OC2=CC=C(S(=O)(O)=O)C=C2)C=C1)C3=CC=CC=C3	O=C(C1=CC(C2=C(OC)C=CC=C2)=C(OC)C=C1)C(C=C3)=CC=C3OC4=CC=C(C(O)=O)C=C4	0.9	22.4777
247921	CoPID247921	O=C(C1=CC=C(OC2=CC=C(S(=O)(O)=O)C=C2)C=C1)C3=CC=CC=C3	CC(C)(C1=CC=C(OCC2=CN(CC3=CC=CC=C3)N=N2)C=C1)C4=CC=C(C=C4)OCC5=CNN=N5	0.9	22.4585
247809	CoPID247809	O=C(C1=CC=C(OC2=CC=C(S(=O)(O)=O)C=C2)C=C1)C3=CC=CC=C3	FC1=C(O)C(F)=C(F)C(C2=C(F)C(F)=C(OC3=CC=C(C4=CC=C(O)C=C4)C=C3)C(F)=C2F)=C1F	0.9	22.4583
241054	CoPID241054	O=C(C1=CC(S(=O)(O)=O)=CC=C1)C2=CC=CC=C2	O=S(C1=CC=CC=C1)(C2=CC=C(OC3=CC=C(S(=O)(C4=CC=CC=C4)=O)C=C3)C=C2)=O	0.9	22.4563
166016	CoPID166016	O=S(C1=CC=CC(C2=CC=CC(S(=O)(O)=O)=C2)=C1)(O)=O	O=C(C1=CC=CC=C1)C2=CC=C(C(C3=CC=CC=C3)=O)C=C2	0.6	22.4276
212090	CoPID212090	O=C(C1=CC(S(=O)(O)=O)=CC=C1)C2=CC=CC=C2	SC(C=C1)=CC=C1SC(C=C2)=CC=C2SC3=C(C#N)C=CC=C3	0.8	22.4164
217587	CoPID217587	O=C(C1=CC=C(OC2=CC(C3=CC(OC)=C(S(=O)(O)=O)C=C3)=C(O)C=C2)C=C1)C4=CC=CC=C4	O=C(C1=CC=CC=C1)C(C=C2)=CC=C2OC(C(C)=C3)=C(C)C=C3C4=CC(C)=C(O)C(C)=C4	0.8	22.4117
247917	CoPID247917	O=C(C1=CC=C(OC2=CC=C(S(=O)(O)=O)C=C2)C=C1)C3=CC=CC=C3	OC(C=C1)=CC=C1C2(C3=CC=C(OC4=CC=CC=C4C#N)C=C3)C5=C(C=CC=C5)C6=CC=CC=C26	0.9	22.3856
247942	CoPID247942	O=C(C1=CC=C(OC2=CC=C(S(=O)(O)=O)C=C2)C=C1)C3=CC=CC=C3	O=C(C1=CC(C(C2=CC=CC=C2)=O)=CC=C1)C(C=C3)=CC=C3OC4=CC=C(C5=CC=C(O)C=C5)C=C4	0.9	22.3416
247867	CoPID247867	O=C(C1=CC=C(OC2=CC=C(S(=O)(O)=O)C=C2)C=C1)C3=CC=CC=C3	O=C(C1=CC=CC2=C1C3=CC=C2)N(NCCCCCCNN(C4=O)C(C5=C(C4=CC=C6)C6=CC=C5)=O)C3=O	0.9	22.3383
241120	CoPID241120	O=C(C1=CC(S(=O)(O)=O)=CC=C1)C2=CC=CC=C2	OC1=CC=C(C2=CC=C(C3=CC=CC=C3C#N)C=C2)C=C1	0.9	22.317
212051	CoPID212051	O=C(C1=CC(S(=O)(O)=O)=CC=C1)C2=CC=CC=C2	O=S(C1=CC=C(S(=O)(O)=O)C=C1)(O)=O	0.8	22.3136
212008	CoPID212008	O=C(C1=CC(S(=O)(O)=O)=CC=C1)C2=CC=CC=C2	SC1=CC=C(SC2=CC=C(SC3=CC=C(S(C4=CC=CC=C4)(=O)=O)C=C3)C=C2)C=C1	0.8	22.3133
241015	CoPID241015	O=C(C1=CC(S(=O)(O)=O)=CC=C1)C2=CC=CC=C2	O=S(C1=CC=C(O)C=C1)(C2=CC=C(OC3=CC=C(C(C4=CC=CC=C4)=O)C=C3)C=C2)=O	0.9	22.2687
241037	CoPID241037	O=C(C1=CC(S(=O)(O)=O)=CC=C1)C2=CC=CC=C2	O=C(C1=CC=CC=C1)C(C=C2)=CC=C2OC(C(C)=C3)=C(C)C=C3C4=CC(C)=C(O)C(C)=C4	0.9	22.2609
241099	CoPID241099	O=C(C1=CC(S(=O)(O)=O)=CC=C1)C2=CC=CC=C2	OC1=CC=C(C(C2=CC=C(OC3=CC=C(C(C4=CC=CC=C4)=O)C=C3)C=C2)=O)C=C1	0.9	22.2594
247832	CoPID247832	O=C(C1=CC=C(OC2=CC=C(S(=O)(O)=O)C=C2)C=C1)C3=CC=CC=C3	O=C(C1=CC=C(OC2=CC=C(P(C3=CC=C(O)C=C3)(C4=CC=CC=C4)=O)C=C2)C=C1)C5=CC=CC=C5	0.9	22.2579
241048	CoPID241048	O=C(C1=CC(S(=O)(O)=O)=CC=C1)C2=CC=CC=C2	CCC1=CC=C(OCCCC)C=C1	0.9	22.2578
218802	CoPID218802	O=C(C1=CC=C(OC2=CC=C(S(=O)(O)=O)C=C2)C=C1)C3=CC=CC=C3	O=C1N(C2=CC=CC=C2C(F)(F)F)C(C3=CC=CC4=C3C1=CC=C4)=O	0.8	22.2408
240982	CoPID240982	O=C(C1=CC(S(=O)(O)=O)=CC=C1)C2=CC=CC=C2	O=C(C1=CC=C(C=C1)F)C2=CC=C(C=C2)OC3=CC=C(C=C3)C(C)(C4=CC=C(C=C4)O)C	0.9	22.1859
240991	CoPID240991	O=C(C1=CC(S(=O)(O)=O)=CC=C1)C2=CC=CC=C2	FC(C(C1=CC=C(C2=NC3=C(C=C(N=CS4)C4=C3)S2)C=C1)(C(F)(F)F)C5=CC=CC=C5)(F)F	0.9	22.1637
246669	CoPID246669	O=C(C1=CC=C(OC2=CC(C3=CC(OC)=C(S(=O)(O)=O)C=C3)=C(O)C=C2)C=C1)C4=CC=CC=C4	O=C(C1=CC=C(CCCCCCCCCCCC)C=C1)C2=CC=CC=C2	0.9	22.1492
153919	CoPID153919	O=C(C1=CC(S(=O)(O)=O)=CC=C1)C2=CC=CC=C2	O=C(C1=CC=C(CCCCCCCCCCCC)C=C1)C2=CC=CC=C2	0.6	22.1271
218790	CoPID218790	O=C(C1=CC=C(OC2=CC=C(S(=O)(O)=O)C=C2)C=C1)C3=CC=CC=C3	O=S(C1=CC=C(O)C=C1)(C2=CC=C(OC3=CC=C(C(C4=CC=CC=C4)=O)C=C3)C=C2)=O	0.8	22.1199
246668	CoPID246668	O=C(C1=CC=C(OC2=CC(C3=CC(OC)=C(S(=O)(O)=O)C=C3)=C(O)C=C2)C=C1)C4=CC=CC=C4	O=C(C1=CC=C(CCC)C=C1)C2=CC=CC=C2	0.9	22.1004
153949	CoPID153949	O=C(C1=CC(S(=O)(O)=O)=CC=C1)C2=CC=CC=C2	OC1=CC=C(C(C2=CC=C(OC3=CC=C(C(C4=CC=CC=C4)=O)C=C3)C=C2)=O)C=C1	0.6	22.0817
247848	CoPID247848	O=C(C1=CC=C(OC2=CC=C(S(=O)(O)=O)C=C2)C=C1)C3=CC=CC=C3	O=C(C1=CC=C(OC2=C(C=CC=C3C(N(C4=CC=CC=C4C)C5=O)=O)C3=C5C=C2)C=C1)C6=CC=CC=C6	0.9	22.0685
127691	CoPID127691	C=C(C1=CC(S(=O)(O)=O)=CC=C1)C2=CC=CC=C2	O=C(C1=CC=CC=C1)C2=CC=C(C(C3=CC=CC=C3)=O)C=C2	0.5	22.0578
212097	CoPID212097	O=C(C1=CC(S(=O)(O)=O)=CC=C1)C2=CC=CC=C2	O=C(C1=CC=C(C2=CC=C(OC3=CC=CC=C3)C=C2)C=C1)C4=CC=CC=C4	0.8	22.0456
241088	CoPID241088	O=C(C1=CC(S(=O)(O)=O)=CC=C1)C2=CC=CC=C2	OC(C=C1)=CC=C1C(C=C2)=CC=C2OC3=C(C#N)C=CC=C3	0.9	22.0419
188559	CoPID188559	O=C(C1=CC=C(OC2=CC(C3=CC(OC)=C(S(=O)(O)=O)C=C3)=C(O)C=C2)C=C1)C4=CC=CC=C4	O=C(C1=CC=C(OC2=CC=C(C(C)(C)C3=CC=C(O)C=C3)C=C2)C=C1)C4=CC=CC=C4	0.7	22.0392
217565	CoPID217565	O=C(C1=CC=C(OC2=CC(C3=CC(OC)=C(S(=O)(O)=O)C=C3)=C(O)C=C2)C=C1)C4=CC=CC=C4	O=S(C1=CC=C(O)C=C1)(C2=CC=C(OC3=CC=C(C(C4=CC=CC=C4)=O)C=C3)C=C2)=O	0.8	21.9865
247899	CoPID247899	O=C(C1=CC=C(OC2=CC=C(S(=O)(O)=O)C=C2)C=C1)C3=CC=CC=C3	O=C(NC1=O)C2=CC=C3C4=C2C1=CC=C4C(N(C5=CC(C6=NC(C7=CC=CC=C7)=NN6)=CC=C5)C3=O)=O	0.9	21.985
241104	CoPID241104	O=C(C1=CC(S(=O)(O)=O)=CC=C1)C2=CC=CC=C2	OC1=CC=C(S(C2=CC=C(OC3=CC=C(C4=CC=CC=C4)C=C3)C=C2)(=O)=O)C=C1	0.9	21.9841
247849	CoPID247849	O=C(C1=CC=C(OC2=CC=C(S(=O)(O)=O)C=C2)C=C1)C3=CC=CC=C3	O=C(C1=C2C(C3=CC=C24)=C(C(NC3=O)=O)C=C1)N(C5=CC=C(C6=NC(C7=CC=CC=C7)=NN6)C=C5)C4=O	0.9	21.9836
240989	CoPID240989	O=C(C1=CC(S(=O)(O)=O)=CC=C1)C2=CC=CC=C2	O=S(C(C=C1)=CC=C1OC(C=C2)=CC=C2C3=CC=C(O)C=C3)(C4=CC=CC=C4)=O	0.9	21.9825
241087	CoPID241087	O=C(C1=CC(S(=O)(O)=O)=CC=C1)C2=CC=CC=C2	O=S(C1=CC=CC=C1)(C2=CC=C(OC3=CC=C(O)C(C4=CC=C(F)C=C4)=C3)C=C2)=O	0.9	21.974
241085	CoPID241085	O=C(C1=CC(S(=O)(O)=O)=CC=C1)C2=CC=CC=C2	O=S(C1=CC=CC=C1)(C2=CC=C(OC3=CC=C(O)C(C4=CC=CC=C4)=C3)C=C2)=O	0.9	21.9656
241082	CoPID241082	O=C(C1=CC(S(=O)(O)=O)=CC=C1)C2=CC=CC=C2	O=S(C1=CC=C(O)C=C1)(C2=CC=C(OC3=CC=C(C=CC=C4)C4=C3)C=C2)=O	0.9	21.9612
247834	CoPID247834	O=C(C1=CC=C(OC2=CC=C(S(=O)(O)=O)C=C2)C=C1)C3=CC=CC=C3	O=P(C1=CC=C(O)C=C1)(C2=CC=CC=C2)C(C=C3)=CC=C3OC(C=C4)=CC=C4S(C5=CC=CC=C5)(=O)=O	0.9	21.9582
241106	CoPID241106	O=C(C1=CC(S(=O)(O)=O)=CC=C1)C2=CC=CC=C2	O=S(C1=CC=CC=C1)(C2=CC=C(OC3=CC=C(C=C(O)C=C4)C4=C3)C=C2)=O	0.9	21.9456
241019	CoPID241019	O=C(C1=CC(S(=O)(O)=O)=CC=C1)C2=CC=CC=C2	O=S(C1=CC=CC=C1)(C2=CC=C(OC3=CC=C(C=CC(O)=C4)C4=C3)C=C2)=O	0.9	21.9425
241086	CoPID241086	O=C(C1=CC(S(=O)(O)=O)=CC=C1)C2=CC=CC=C2	O=S(C1=CC=CC=C1)(C2=CC=C(OC3=CC=C(O)C=C3)C=C2)=O	0.9	21.9372
241094	CoPID241094	O=C(C1=CC(S(=O)(O)=O)=CC=C1)C2=CC=CC=C2	O=S(C1=CC=C(OC2=CC=CC=C2C3=CC=C(F)C=C3)C=C1)(C4=CC=C(O)C=C4)=O	0.9	21.9329
241021	CoPID241021	O=C(C1=CC(S(=O)(O)=O)=CC=C1)C2=CC=CC=C2	OC1=CC=C(OC2=CC=C(OC3=CC=C(S(C4=CC=CC=C4)(=O)=O)C=C3)C=C2)C=C1	0.9	21.9299
240976	CoPID240976	O=C(C1=CC(S(=O)(O)=O)=CC=C1)C2=CC=CC=C2	O=S(C1=CC=CC=C1)(C2=CC=C(OC3=CC=C(O)C(C4=CC(F)=C(F)C=C4)=C3)C=C2)=O	0.9	21.9298
241115	CoPID241115	O=C(C1=CC(S(=O)(O)=O)=CC=C1)C2=CC=CC=C2	O=S(C1=CC=C(O)C=C1)(C2=CC=C(OC3=CC=CC=C3)C=C2)=O	0.9	21.926
260980	CoPID260980	CCCCCCN(C1=O)C(C2=CC(S(=O)(O)=O)=CC(C2=C1C=C3)=C3C4=C5C(C6=CC(S(=O)(O)=O)=C5)=C(C(NC6=O)=O)C=C4)=O	O=S(C1=C(C2=NC3=C(C=C(N=CS4)C4=C3)S2)C=CC=C1)(C5=CC=CC=C5)=O	0.9	21.917
218866	CoPID218866	O=C(C1=CC=C(OC2=CC=C(S(=O)(O)=O)C=C2)C=C1)C3=CC=CC=C3	O=C(C1=CC=CC=C1)C2=CC=C(C(C3=CC=CC=C3)=O)C=C2	0.8	21.9158
241081	CoPID241081	O=C(C1=CC(S(=O)(O)=O)=CC=C1)C2=CC=CC=C2	OC1=CC=CC(OC2=CC=C(C=CC=C3)C3=C2)=C1C#N	0.9	21.905
212019	CoPID212019	O=C(C1=CC(S(=O)(O)=O)=CC=C1)C2=CC=CC=C2	O=C(C1=CC=C(CCCCCCCCCCCC)C=C1)C2=CC=CC=C2	0.8	21.8976
241070	CoPID241070	O=C(C1=CC(S(=O)(O)=O)=CC=C1)C2=CC=CC=C2	O=C(C1=CC=C(CCCCCCCCCCCCCCCCCC)C=C1)C2=CC=CC=C2	0.9	21.8895
246740	CoPID246740	O=C(C1=CC=C(OC2=CC(C3=CC(OC)=C(S(=O)(O)=O)C=C3)=C(O)C=C2)C=C1)C4=CC=CC=C4	SC(C=C1)=CC=C1SC(C=C2)=CC=C2SC3=C(C#N)C=CC=C3	0.9	21.8854
241122	CoPID241122	O=C(C1=CC(S(=O)(O)=O)=CC=C1)C2=CC=CC=C2	N=P(OC1=CC=C(F)C=C1)OC2=CC=C(OC)C=C2	0.9	21.8772
241029	CoPID241029	O=C(C1=CC(S(=O)(O)=O)=CC=C1)C2=CC=CC=C2	CC(C)(C1=CC=C(OC2=CC=C(S(C3=CC=CC=C3)(=O)=O)C=C2)C=C1)C4=CC=C(O)C=C4	0.9	21.8688
241046	CoPID241046	O=C(C1=CC(S(=O)(O)=O)=CC=C1)C2=CC=CC=C2	O=S(C1=CC=CC=C1)(C2=CC=C(OC3=CC=C(O)C(C(C)(C)C)=C3)C=C2)=O	0.9	21.8515
211486	CoPID211486	O=C(NC1=O)C2=C(C1=CC=C3)C3=C(C4=C(C=CC=C5C(N(C6=CC(S(=O)(O)=O)=C(OC7=CC=CC=C7S(=O)(O)=O)C=C6)C8=O)=O)C5=C8C=C4)C=C2	O=C(NC1=O)C2=C(C1=CC=C3)C3=C(C4=C(C=CC=C5C(N(C6=CC=C(OC7=CC=CC=C7)C=C6)C8=O)=O)C5=C8C=C4)C=C2	0.8	21.8478
182999	CoPID182999	O=C(C1=CC(S(=O)(O)=O)=CC=C1)C2=CC=CC=C2	OC1=CC=C(C(C2=CC=C(OC3=CC=C(C(C4=CC=CC=C4)=O)C=C3)C=C2)=O)C=C1	0.7	21.8477
241083	CoPID241083	O=C(C1=CC(S(=O)(O)=O)=CC=C1)C2=CC=CC=C2	O=P(C1=CC=C(OC2=CC=C(O)C=C2)C=C1)(C3=CC=CC=C3)C4=CC=CC=C4	0.9	21.8423
135041	CoPID135041	OC1=C(S(=O)(O)=O)C=C(C=C(S(=O)(O)=O)C(OC2=CC=CC=C2C#N)=C3)C3=C1	O=C(C1=CC=CC=C1)C2=CC=C(C(C3=CC=CC=C3)=O)C=C2	0.5	21.8333
241002	CoPID241002	O=C(C1=CC(S(=O)(O)=O)=CC=C1)C2=CC=CC=C2	C1(C2=NC3=CC=C(C4=CC=C(NC=N5)C5=C4)C=C3N2)=CC=CC6=C1C=CC=C6	0.9	21.8226
247939	CoPID247939	O=C(C1=CC=C(OC2=CC=C(S(=O)(O)=O)C=C2)C=C1)C3=CC=CC=C3	O=C(C1=CC=CC(C(C2=CC=C(OC3=CC=C(C(C)(C)C4=CC=C(O)C=C4)C=C3)C=C2)=O)=C1)C5=CC=CC=C5	0.9	21.8183
246615	CoPID246615	O=C(C1=CC=C(OC2=CC(C3=CC(OC)=C(S(=O)(O)=O)C=C3)=C(O)C=C2)C=C1)C4=CC=CC=C4	O=S(C1=CC=C(O)C=C1)(C2=CC=C(OC3=CC=C(C(C4=CC=CC=C4)=O)C=C3)C=C2)=O	0.9	21.7989
246736	CoPID246736	O=C(C1=CC=C(OC2=CC(C3=CC(OC)=C(S(=O)(O)=O)C=C3)=C(O)C=C2)C=C1)C4=CC=CC=C4	O=CC1=CC=CC(C(NC2=CC=CC(C(C(F)(F)F)(C(F)(F)F)C3=CC=C(N)C=C3)=C2)=O)=C1	0.9	21.7983
261089	CoPID261089	CCCCCCN(C1=O)C(C2=CC(S(=O)(O)=O)=CC(C2=C1C=C3)=C3C4=C5C(C6=CC(S(=O)(O)=O)=C5)=C(C(NC6=O)=O)C=C4)=O	SC1=CC(C=C2)=C(C=C1)C=C2SC3=C(C#N)C=CC=C3	0.9	21.7931
246695	CoPID246695	O=C(C1=CC=C(OC2=CC(C3=CC(OC)=C(S(=O)(O)=O)C=C3)=C(O)C=C2)C=C1)C4=CC=CC=C4	OC1=CC=C(S(=O)(C2=CC=C(OC3=CC=C(S(C4=CC=CC=C4)(=O)=O)C=C3)C=C2)=O)C=C1	0.9	21.7881
246629	CoPID246629	O=C(C1=CC=C(OC2=CC(C3=CC(OC)=C(S(=O)(O)=O)C=C3)=C(O)C=C2)C=C1)C4=CC=CC=C4	CC(C)(C1=CC=C(OC2=CC=C(S(C3=CC=CC=C3)(=O)=O)C=C2)C=C1)C4=CC=C(O)C=C4	0.9	21.7819
240536	CoPID240536	O=C(NC1=O)C2=C(C1=CC=C3)C3=C(C4=C(C=CC=C5C(N(C6=CC(S(=O)(O)=O)=C(OC7=CC=CC=C7S(=O)(O)=O)C=C6)C8=O)=O)C5=C8C=C4)C=C2	O=C(NC1=O)C2=C(C1=CC=C3)C3=C(C4=C(C=CC=C5C(N(C6=CC=C(OC7=CC=CC=C7)C=C6)C8=O)=O)C5=C8C=C4)C=C2	0.9	21.7649
218881	CoPID218881	O=C(C1=CC=C(OC2=CC=C(S(=O)(O)=O)C=C2)C=C1)C3=CC=CC=C3	O=S(C1=CC=CC=C1)(C2=CC=C(OC3=CC=C(C=C(O)C=C4)C4=C3)C=C2)=O	0.8	21.755
261008	CoPID261008	CCCCCCN(C1=O)C(C2=CC(S(=O)(O)=O)=CC(C2=C1C=C3)=C3C4=C5C(C6=CC(S(=O)(O)=O)=C5)=C(C(NC6=O)=O)C=C4)=O	SC1=CC=C(SC2=CC=C(SC3=CC=C(S(C4=CC=CC=C4)(=O)=O)C=C3)C=C2)C=C1	0.9	21.7481
247864	CoPID247864	O=C(C1=CC=C(OC2=CC=C(S(=O)(O)=O)C=C2)C=C1)C3=CC=CC=C3	O=C(CCCCCCCC=O)NC1=CC=C(C2(C3=CC=C(N)C=C3)C4=CC=CC=C4C5=C2C=CC=C5)C=C1	0.9	21.7424
218863	CoPID218863	O=C(C1=CC=C(OC2=CC=C(S(=O)(O)=O)C=C2)C=C1)C3=CC=CC=C3	OC(C=C1)=CC=C1C(C=C2)=CC=C2OC3=C(C#N)C=CC=C3	0.8	21.7408
218832	CoPID218832	O=C(C1=CC=C(OC2=CC=C(S(=O)(O)=O)C=C2)C=C1)C3=CC=CC=C3	OC(C=C1)=CC=C1C(C)(C)C(C=C2)=CC=C2OC3=CC=C(C(C4=CC=CC=C4)=O)C=C3	0.8	21.7375
212070	CoPID212070	O=C(C1=CC(S(=O)(O)=O)=CC=C1)C2=CC=CC=C2	OC1=CC=C(C2=CC=C(C3=CC=CC=C3C#N)C=C2)C=C1	0.8	21.7368
212049	CoPID212049	O=C(C1=CC(S(=O)(O)=O)=CC=C1)C2=CC=CC=C2	OC1=CC=C(C(C2=CC=C(OC3=CC=C(C(C4=CC=CC=C4)=O)C=C3)C=C2)=O)C=C1	0.8	21.7309
183047	CoPID183047	O=C(C1=CC(S(=O)(O)=O)=CC=C1)C2=CC=CC=C2	O=C(C1=CC=C(C2=CC=C(OC3=CC=CC=C3)C=C2)C=C1)C4=CC=CC=C4	0.7	21.7298
218794	CoPID218794	O=C(C1=CC=C(OC2=CC=C(S(=O)(O)=O)C=C2)C=C1)C3=CC=CC=C3	O=S(C1=CC=CC=C1)(C2=CC=C(OC3=CC=C(C=CC(O)=C4)C4=C3)C=C2)=O	0.8	21.7282
246739	CoPID246739	O=C(C1=CC=C(OC2=CC(C3=CC(OC)=C(S(=O)(O)=O)C=C3)=C(O)C=C2)C=C1)C4=CC=CC=C4	SC1=CC(C=C2)=C(C=C1)C=C2SC3=C(C#N)C=CC=C3	0.9	21.7273
231942	CoPID231942	CCCCCCN(C1=O)C(C2=CC(S(=O)(O)=O)=CC(C2=C1C=C3)=C3C4=C5C(C6=CC(S(=O)(O)=O)=C5)=C(C(NC6=O)=O)C=C4)=O	O=C(C1=CC=CC2=C1C3=CC=C2)N(NCCCCCCNN(C4=O)C(C5=C(C4=CC=C6)C6=CC=C5)=O)C3=O	0.8	21.7246
217654	CoPID217654	O=C(C1=CC=C(OC2=CC(C3=CC(OC)=C(S(=O)(O)=O)C=C3)=C(O)C=C2)C=C1)C4=CC=CC=C4	OC1=CC=C(S(C2=CC=C(OC3=CC=C(C4=CC=CC=C4)C=C3)C=C2)(=O)=O)C=C1	0.8	21.7159
211965	CoPID211965	O=C(C1=CC(S(=O)(O)=O)=CC=C1)C2=CC=CC=C2	O=S(C1=CC=C(O)C=C1)(C2=CC=C(OC3=CC=C(C(C4=CC=CC=C4)=O)C=C3)C=C2)=O	0.8	21.7128
246704	CoPID246704	O=C(C1=CC=C(OC2=CC(C3=CC(OC)=C(S(=O)(O)=O)C=C3)=C(O)C=C2)C=C1)C4=CC=CC=C4	OC1=CC=C(S(C2=CC=C(OC3=CC=C(C4=CC=CC=C4)C=C3)C=C2)(=O)=O)C=C1	0.9	21.7065
246682	CoPID246682	O=C(C1=CC=C(OC2=CC(C3=CC(OC)=C(S(=O)(O)=O)C=C3)=C(O)C=C2)C=C1)C4=CC=CC=C4	O=S(C1=CC=C(O)C=C1)(C2=CC=C(OC3=CC=C(C=CC=C4)C4=C3)C=C2)=O	0.9	21.7063
218885	CoPID218885	O=C(C1=CC=C(OC2=CC=C(S(=O)(O)=O)C=C2)C=C1)C3=CC=CC=C3	O=C(C1=CC=CC=C1)C2=CC=CC=C2	0.8	21.6968
241146	CoPID241146	O=C(C1=CC(S(=O)(O)=O)=CC=C1)C2=CC=CC=C2	OC1=CC=C(C(C2=C(C(O)=O)C=CC=C2)C3=CC=C(OC4=CC=CC=C4C#N)C=C3)C=C1	0.9	21.6862
247806	CoPID247806	O=C(C1=CC=C(OC2=CC=C(S(=O)(O)=O)C=C2)C=C1)C3=CC=CC=C3	C=S(C(C=C1)=CC=C1OC2=CC3=CC=CC=C3C=C2)(C4=CC=C(OC5=CC=C(C=CC(O)=C6)C6=C5)C=C4)=C	0.9	21.6709
241071	CoPID241071	O=C(C1=CC(S(=O)(O)=O)=CC=C1)C2=CC=CC=C2	O=C(NC1=O)C2=CC=C3C4=C2C1=CC=C4C(N(C5=CC=C(OC6=CC=CC=C6)C=C5)C3=O)=O	0.9	21.6696
217632	CoPID217632	O=C(C1=CC=C(OC2=CC(C3=CC(OC)=C(S(=O)(O)=O)C=C3)=C(O)C=C2)C=C1)C4=CC=CC=C4	O=S(C1=CC=C(O)C=C1)(C2=CC=C(OC3=CC=C(C=CC=C4)C4=C3)C=C2)=O	0.8	21.6646
182960	CoPID182960	O=C(C1=CC(S(=O)(O)=O)=CC=C1)C2=CC=CC=C2	O=C(C1=CC(C2=C(OC)C=CC=C2)=C(OC)C=C1)C(C=C3)=CC=C3OC4=CC=C(C(O)=O)C=C4	0.7	21.6621
218857	CoPID218857	O=C(C1=CC=C(OC2=CC=C(S(=O)(O)=O)C=C2)C=C1)C3=CC=CC=C3	O=S(C1=CC=C(O)C=C1)(C2=CC=C(OC3=CC=C(C=CC=C4)C4=C3)C=C2)=O	0.8	21.655
241025	CoPID241025	O=C(C1=CC(S(=O)(O)=O)=CC=C1)C2=CC=CC=C2	O=C(C1=CC=C(C(C2=CC=C(OC3=CC=C(O)C(C(C)(C)C)=C3)C=C2)=O)C=C1)C4=CC=CC=C4	0.9	21.6446
212098	CoPID212098	O=C(C1=CC(S(=O)(O)=O)=CC=C1)C2=CC=CC=C2	N#CC1=C(C2=CC=C(OC3=CC=CC=C3)C=C2)C=CC=C1	0.8	21.6389
95818	CoPID95818	O=C(C1=CC(S(=O)(O)=O)=CC=C1)C2=CC=CC=C2	O=C(C1=CC=C(CCC)C=C1)C2=CC=CC=C2	0.4	21.6381
212040	CoPID212040	O=C(C1=CC(S(=O)(O)=O)=CC=C1)C2=CC=CC=C2	O=C(C1=CC=CC(C=O)=C1)NC(C=C2)=CC=C2OC3=C(C#N)C(OC4=CC=C(N)C=C4)=CC=C3	0.8	21.6333
241095	CoPID241095	O=C(C1=CC(S(=O)(O)=O)=CC=C1)C2=CC=CC=C2	OC1=CC=C(S(=O)(C2=CC=C(OC3=CC=C(S(C4=CC=CC=C4)(=O)=O)C=C3)C=C2)=O)C=C1	0.9	21.6301
183039	CoPID183039	O=C(C1=CC(S(=O)(O)=O)=CC=C1)C2=CC=CC=C2	SC1=CC(C=C2)=C(C=C1)C=C2SC3=C(C#N)C=CC=C3	0.7	21.6261
218878	CoPID218878	O=C(C1=CC=C(OC2=CC=C(S(=O)(O)=O)C=C2)C=C1)C3=CC=CC=C3	OC1=CC=C(C(C(C=C2)=CC=C2OC(C=C3)=CC=C3C(CCC(O)=O)(C)C4=CC=CC=C4)=O)C=C1	0.8	21.6258
218861	CoPID218861	O=C(C1=CC=C(OC2=CC=C(S(=O)(O)=O)C=C2)C=C1)C3=CC=CC=C3	O=S(C1=CC=CC=C1)(C2=CC=C(OC3=CC=C(O)C=C3)C=C2)=O	0.8	21.619
247853	CoPID247853	O=C(C1=CC=C(OC2=CC=C(S(=O)(O)=O)C=C2)C=C1)C3=CC=CC=C3	O=C1N(C2=CC=CC=C2C(F)(F)F)C(C3=CC=C4C5=C3C1=CC=C5C(N(C6=C(C(F)(F)F)C=CC=C6)C4=O)=O)=O	0.9	21.6183
246648	CoPID246648	O=C(C1=CC=C(OC2=CC(C3=CC(OC)=C(S(=O)(O)=O)C=C3)=C(O)C=C2)C=C1)C4=CC=CC=C4	CCC1=CC=C(OCCCC)C=C1	0.9	21.6114
135049	CoPID135049	OC1=C(S(=O)(O)=O)C=C(C=C(S(=O)(O)=O)C(OC2=CC=CC=C2C#N)=C3)C3=C1	OC1=CC=C(C(C2=CC=C(OC3=CC=C(C(C4=CC=CC=C4)=O)C=C3)C=C2)=O)C=C1	0.5	21.6102
212007	CoPID212007	O=C(C1=CC(S(=O)(O)=O)=CC=C1)C2=CC=CC=C2	OC(C=C1)=CC=C1C(C)(C)C(C=C2)=CC=C2OC3=CC=C(C(C4=CC=CC=C4)=O)C=C3	0.8	21.6064
218757	CoPID218757	O=C(C1=CC=C(OC2=CC=C(S(=O)(O)=O)C=C2)C=C1)C3=CC=CC=C3	O=C(C1=CC=C(C=C1)F)C2=CC=C(C=C2)OC3=CC=C(C=C3)C(C)(C4=CC=C(C=C4)O)C	0.8	21.6021
246747	CoPID246747	O=C(C1=CC=C(OC2=CC(C3=CC(OC)=C(S(=O)(O)=O)C=C3)=C(O)C=C2)C=C1)C4=CC=CC=C4	O=C(C1=CC=C(C2=CC=C(OC3=CC=CC=C3)C=C2)C=C1)C4=CC=CC=C4	0.9	21.5926
241150	CoPID241150	O=C(C1=CC(S(=O)(O)=O)=CC=C1)C2=CC=CC=C2	CCCCCCN(C1=O)C(C2=CC=CC(C2=C1C=C3)=C3C4=C5C(C6=CC=C5)=C(C(NC6=O)=O)C=C4)=O	0.9	21.5922
182915	CoPID182915	O=C(C1=CC(S(=O)(O)=O)=CC=C1)C2=CC=CC=C2	O=S(C1=CC=C(O)C=C1)(C2=CC=C(OC3=CC=C(C(C4=CC=CC=C4)=O)C=C3)C=C2)=O	0.7	21.5868
211939	CoPID211939	O=C(C1=CC(S(=O)(O)=O)=CC=C1)C2=CC=CC=C2	O=S(C(C=C1)=CC=C1OC(C=C2)=CC=C2C3=CC=C(O)C=C3)(C4=CC=CC=C4)=O	0.8	21.5827
231930	CoPID231930	CCCCCCN(C1=O)C(C2=CC(S(=O)(O)=O)=CC(C2=C1C=C3)=C3C4=C5C(C6=CC(S(=O)(O)=O)=C5)=C(C(NC6=O)=O)C=C4)=O	O=S(C1=C(C2=NC3=C(C=C(N=CS4)C4=C3)S2)C=CC=C1)(C5=CC=CC=C5)=O	0.8	21.5725
183001	CoPID183001	O=C(C1=CC(S(=O)(O)=O)=CC=C1)C2=CC=CC=C2	O=S(C1=CC=C(S(=O)(O)=O)C=C1)(O)=O	0.7	21.5581
246576	CoPID246576	O=C(C1=CC=C(OC2=CC(C3=CC(OC)=C(S(=O)(O)=O)C=C3)=C(O)C=C2)C=C1)C4=CC=CC=C4	O=S(C1=CC=CC=C1)(C2=CC=C(OC3=CC=C(O)C(C4=CC(F)=C(F)C=C4)=C3)C=C2)=O	0.9	21.5533
136984	CoPID136984	O=S(C1=CC=CC(C2=CC=CC(S(=O)(O)=O)=C2)=C1)(O)=O	O=C(C1=C2C(C=CC=C23)=CC=C1)N(C4=CC=CC(C(C5=CC=CC=C5)=O)=C4)C3=O	0.5	21.5523
246720	CoPID246720	O=C(C1=CC=C(OC2=CC(C3=CC(OC)=C(S(=O)(O)=O)C=C3)=C(O)C=C2)C=C1)C4=CC=CC=C4	OC1=CC=C(C2=CC=C(C3=CC=CC=C3C#N)C=C2)C=C1	0.9	21.5482
240985	CoPID240985	O=C(C1=CC(S(=O)(O)=O)=CC=C1)C2=CC=CC=C2	O=C(C1=CC=C(F)C=C1)C(C=C2)=CC=C2OC(C=C3)=CC=C3C(C(F)(F)F)(C(F)(F)F)C4=CC=CC=C4	0.9	21.5353
212038	CoPID212038	O=C(C1=CC(S(=O)(O)=O)=CC=C1)C2=CC=CC=C2	OC(C=C1)=CC=C1C(C=C2)=CC=C2OC3=C(C#N)C=CC=C3	0.8	21.5341
153910	CoPID153910	O=C(C1=CC(S(=O)(O)=O)=CC=C1)C2=CC=CC=C2	O=C(C1=CC(C2=C(OC)C=CC=C2)=C(OC)C=C1)C(C=C3)=CC=C3OC4=CC=C(C(O)=O)C=C4	0.6	21.5287
153865	CoPID153865	O=C(C1=CC(S(=O)(O)=O)=CC=C1)C2=CC=CC=C2	O=S(C1=CC=C(O)C=C1)(C2=CC=C(OC3=CC=C(C(C4=CC=CC=C4)=O)C=C3)C=C2)=O	0.6	21.5253
218890	CoPID218890	O=C(C1=CC=C(OC2=CC=C(S(=O)(O)=O)C=C2)C=C1)C3=CC=CC=C3	O=S(C1=CC=C(O)C=C1)(C2=CC=C(OC3=CC=CC=C3)C=C2)=O	0.8	21.5141
211932	CoPID211932	O=C(C1=CC(S(=O)(O)=O)=CC=C1)C2=CC=CC=C2	O=C(C1=CC=C(C=C1)F)C2=CC=C(C=C2)OC3=CC=C(C=C3)C(C)(C4=CC=C(C=C4)O)C	0.8	21.5129
218895	CoPID218895	O=C(C1=CC=C(OC2=CC=C(S(=O)(O)=O)C=C2)C=C1)C3=CC=CC=C3	OC1=CC=C(C2=CC=C(C3=CC=CC=C3C#N)C=C2)C=C1	0.8	21.5122
241075	CoPID241075	O=C(C1=CC(S(=O)(O)=O)=CC=C1)C2=CC=CC=C2	O=C(NC1=O)C2=CC=C3C4=C2C1=CC=C4C(N(C5=CC6=C(NC7=C6C=C(C)C=C7)C=C5)C3=O)=O	0.9	21.5103
212086	CoPID212086	O=C(C1=CC(S(=O)(O)=O)=CC=C1)C2=CC=CC=C2	O=CC1=CC=CC(C(NC2=CC=CC(C(C(F)(F)F)(C(F)(F)F)C3=CC=C(N)C=C3)=C2)=O)=C1	0.8	21.509
218805	CoPID218805	O=C(C1=CC=C(OC2=CC=C(S(=O)(O)=O)C=C2)C=C1)C3=CC=CC=C3	O=S(C1=C(C2=NC3=C(C=C(N=CS4)C4=C3)S2)C=CC=C1)(C5=CC=CC=C5)=O	0.8	21.5031
212035	CoPID212035	O=C(C1=CC(S(=O)(O)=O)=CC=C1)C2=CC=CC=C2	O=S(C1=CC=CC=C1)(C2=CC=C(OC3=CC=C(O)C(C4=CC=CC=C4)=C3)C=C2)=O	0.8	21.5029
246694	CoPID246694	O=C(C1=CC=C(OC2=CC(C3=CC(OC)=C(S(=O)(O)=O)C=C3)=C(O)C=C2)C=C1)C4=CC=CC=C4	O=S(C1=CC=C(OC2=CC=CC=C2C3=CC=C(F)C=C3)C=C1)(C4=CC=C(O)C=C4)=O	0.9	21.5008
217644	CoPID217644	O=C(C1=CC=C(OC2=CC(C3=CC(OC)=C(S(=O)(O)=O)C=C3)=C(O)C=C2)C=C1)C4=CC=CC=C4	O=S(C1=CC=C(OC2=CC=CC=C2C3=CC=C(F)C=C3)C=C1)(C4=CC=C(O)C=C4)=O	0.8	21.4867
246715	CoPID246715	O=C(C1=CC=C(OC2=CC(C3=CC(OC)=C(S(=O)(O)=O)C=C3)=C(O)C=C2)C=C1)C4=CC=CC=C4	O=S(C1=CC=C(O)C=C1)(C2=CC=C(OC3=CC=CC=C3)C=C2)=O	0.9	21.4823
212056	CoPID212056	O=C(C1=CC(S(=O)(O)=O)=CC=C1)C2=CC=CC=C2	O=S(C1=CC=CC=C1)(C2=CC=C(OC3=CC=C(C=C(O)C=C4)C4=C3)C=C2)=O	0.8	21.4787
218923	CoPID218923	O=C(C1=CC=C(OC2=CC=C(S(=O)(O)=O)C=C2)C=C1)C3=CC=CC=C3	N#CC1=C(C2=CC=C(OC3=CC=CC=C3)C=C2)C=CC=C1	0.8	21.4769
212036	CoPID212036	O=C(C1=CC(S(=O)(O)=O)=CC=C1)C2=CC=CC=C2	O=S(C1=CC=CC=C1)(C2=CC=C(OC3=CC=C(O)C=C3)C=C2)=O	0.8	21.4768
105991	CoPID105991	OC1=C(S(=O)(O)=O)C=C(C=C(S(=O)(O)=O)C(OC2=CC=CC=C2C#N)=C3)C3=C1	O=C(C1=CC=CC=C1)C2=CC=C(C(C3=CC=CC=C3)=O)C=C2	0.4	21.4738
217645	CoPID217645	O=C(C1=CC=C(OC2=CC(C3=CC(OC)=C(S(=O)(O)=O)C=C3)=C(O)C=C2)C=C1)C4=CC=CC=C4	OC1=CC=C(S(=O)(C2=CC=C(OC3=CC=C(S(C4=CC=CC=C4)(=O)=O)C=C3)C=C2)=O)C=C1	0.8	21.4737
211969	CoPID211969	O=C(C1=CC(S(=O)(O)=O)=CC=C1)C2=CC=CC=C2	O=S(C1=CC=CC=C1)(C2=CC=C(OC3=CC=C(C=CC(O)=C4)C4=C3)C=C2)=O	0.8	21.4679
218911	CoPID218911	O=C(C1=CC=C(OC2=CC=C(S(=O)(O)=O)C=C2)C=C1)C3=CC=CC=C3	O=CC1=CC=CC(C(NC2=CC=CC(C(C(F)(F)F)(C(F)(F)F)C3=CC=C(N)C=C3)=C2)=O)=C1	0.8	21.4671
241090	CoPID241090	O=C(C1=CC(S(=O)(O)=O)=CC=C1)C2=CC=CC=C2	O=C(C1=CC=CC(C=O)=C1)NC(C=C2)=CC=C2OC3=C(C#N)C(OC4=CC=C(N)C=C4)=CC=C3	0.9	21.4587
240980	CoPID240980	O=C(C1=CC(S(=O)(O)=O)=CC=C1)C2=CC=CC=C2	O=P(C1=CC=C(SC2=CC=C(SC3=CC=C(S)C=C3)C=C2)C=C1)(C4=CC=CC=C4)C5=CC=CC=C5	0.9	21.4534
211981	CoPID211981	O=C(C1=CC(S(=O)(O)=O)=CC=C1)C2=CC=CC=C2	CC(C1=CC=CC=C1)(C(F)(F)F)C2=CC=C(C3=NC4=C(C=C(N=CS5)C5=C4)S3)C=C2	0.8	21.4532
218821	CoPID218821	O=C(C1=CC=C(OC2=CC=C(S(=O)(O)=O)C=C2)C=C1)C3=CC=CC=C3	O=S(C1=CC=CC=C1)(C2=CC=C(OC3=CC=C(O)C(C(C)(C)C)=C3)C=C2)=O	0.8	21.4413
261145	CoPID261145	O=C(NC1=O)C2=C(C1=CC=C3)C3=C(C4=C(C=CC=C5C(N(C6=CC=C(OC7=C(S(=O)(O)=O)C=CC=C7)C(S(=O)(O)=O)=C6)C8=O)=O)C5=C8C=C4)C=C2	O=C(NC1=O)C2=C(C1=CC=C3)C3=C(C4=C(C=CC=C5C(N(C6=CC=C(N(C7=CC=CC=C7)C8=CC=CC=C8)C=C6)C9=O)=O)C5=C9C=C4)C=C2	0.9	21.4313
118434	CoPID118434	O=S(C1=CC=CC=C1)(O)=O	O=C(C1=C2C(C=CC=C23)=CC=C1)N(C4=CC=CC(C(C5=CC=CC=C5)=O)=C4)C3=O	0.5	21.431
218884	CoPID218884	O=C(C1=CC=C(OC2=CC=C(S(=O)(O)=O)C=C2)C=C1)C3=CC=CC=C3	O=C(C1=C2C(C=CC=C23)=CC=C1)N(C4=CC=CC(C(C5=CC=CC=C5)=O)=C4)C3=O	0.8	21.4305
98641	CoPID98641	C=C(C1=CC(S(=O)(O)=O)=CC=C1)C2=CC=CC=C2	O=C(C1=CC=CC=C1)C2=CC=C(C(C3=CC=CC=C3)=O)C=C2	0.4	21.4246
241103	CoPID241103	O=C(C1=CC(S(=O)(O)=O)=CC=C1)C2=CC=CC=C2	OC1=CC=C(C(C(C=C2)=CC=C2OC(C=C3)=CC=C3C(CCC(O)=O)(C)C4=CC=CC=C4)=O)C=C1	0.9	21.4229
183040	CoPID183040	O=C(C1=CC(S(=O)(O)=O)=CC=C1)C2=CC=CC=C2	SC(C=C1)=CC=C1SC(C=C2)=CC=C2SC3=C(C#N)C=CC=C3	0.7	21.4059
153997	CoPID153997	O=C(C1=CC(S(=O)(O)=O)=CC=C1)C2=CC=CC=C2	O=C(C1=CC=C(C2=CC=C(OC3=CC=CC=C3)C=C2)C=C1)C4=CC=CC=C4	0.6	21.4004
218860	CoPID218860	O=C(C1=CC=C(OC2=CC=C(S(=O)(O)=O)C=C2)C=C1)C3=CC=CC=C3	O=S(C1=CC=CC=C1)(C2=CC=C(OC3=CC=C(O)C(C4=CC=CC=C4)=C3)C=C2)=O	0.8	21.3925
246703	CoPID246703	O=C(C1=CC=C(OC2=CC(C3=CC(OC)=C(S(=O)(O)=O)C=C3)=C(O)C=C2)C=C1)C4=CC=CC=C4	OC1=CC=C(C(C(C=C2)=CC=C2OC(C=C3)=CC=C3C(CCC(O)=O)(C)C4=CC=CC=C4)=O)C=C1	0.9	21.3864
211987	CoPID211987	O=C(C1=CC(S(=O)(O)=O)=CC=C1)C2=CC=CC=C2	O=C(C1=CC=CC=C1)C(C=C2)=CC=C2OC(C(C)=C3)=C(C)C=C3C4=CC(C)=C(O)C(C)=C4	0.8	21.3844
107935	CoPID107935	O=S(C1=CC=CC(C2=CC=CC(S(=O)(O)=O)=C2)=C1)(O)=O	O=C(C1=CC=CC=C1)C2=CC=CC=C2	0.4	21.3751
212054	CoPID212054	O=C(C1=CC(S(=O)(O)=O)=CC=C1)C2=CC=CC=C2	OC1=CC=C(S(C2=CC=C(OC3=CC=C(C4=CC=CC=C4)C=C3)C=C2)(=O)=O)C=C1	0.8	21.3732
212033	CoPID212033	O=C(C1=CC(S(=O)(O)=O)=CC=C1)C2=CC=CC=C2	O=P(C1=CC=C(OC2=CC=C(O)C=C2)C=C1)(C3=CC=CC=C3)C4=CC=CC=C4	0.8	21.3723
217638	CoPID217638	O=C(C1=CC=C(OC2=CC(C3=CC(OC)=C(S(=O)(O)=O)C=C3)=C(O)C=C2)C=C1)C4=CC=CC=C4	OC(C=C1)=CC=C1C(C=C2)=CC=C2OC3=C(C#N)C=CC=C3	0.8	21.3711
240498	CoPID240498	O=C(NC1=O)C2=C(C1=CC=C3)C3=C(C4=C(C=CC=C5C(N(C6=CC(S(=O)(O)=O)=C(OC7=CC=CC=C7S(=O)(O)=O)C=C6)C8=O)=O)C5=C8C=C4)C=C2	O=C(C1=CC=C(OC2=C(C=CC=C3C(N(C4=CC=CC=C4C)C5=O)=O)C3=C5C=C2)C=C1)C6=CC=CC=C6	0.9	21.3678
246602	CoPID246602	O=C(C1=CC=C(OC2=CC(C3=CC(OC)=C(S(=O)(O)=O)C=C3)=C(O)C=C2)C=C1)C4=CC=CC=C4	C1(C2=NC3=CC=C(C4=CC=C(NC=N5)C5=C4)C=C3N2)=CC=CC6=C1C=CC=C6	0.9	21.3662
217665	CoPID217665	O=C(C1=CC=C(OC2=CC(C3=CC(OC)=C(S(=O)(O)=O)C=C3)=C(O)C=C2)C=C1)C4=CC=CC=C4	O=S(C1=CC=C(O)C=C1)(C2=CC=C(OC3=CC=CC=C3)C=C2)=O	0.8	21.3662
31285	CoPID31285	O=S(C1=CC=CC=C1)(O)=O	O=C(C1=CC=CC=C1)C2=CC=CC=C2	0.2	21.3649
211971	CoPID211971	O=C(C1=CC(S(=O)(O)=O)=CC=C1)C2=CC=CC=C2	OC1=CC=C(OC2=CC=C(OC3=CC=C(S(C4=CC=CC=C4)(=O)=O)C=C3)C=C2)C=C1	0.8	21.3622
153989	CoPID153989	O=C(C1=CC(S(=O)(O)=O)=CC=C1)C2=CC=CC=C2	SC1=CC(C=C2)=C(C=C1)C=C2SC3=C(C#N)C=CC=C3	0.6	21.3523
218922	CoPID218922	O=C(C1=CC=C(OC2=CC=C(S(=O)(O)=O)C=C2)C=C1)C3=CC=CC=C3	O=C(C1=CC=C(C2=CC=C(OC3=CC=CC=C3)C=C2)C=C1)C4=CC=CC=C4	0.8	21.3522
217633	CoPID217633	O=C(C1=CC=C(OC2=CC(C3=CC(OC)=C(S(=O)(O)=O)C=C3)=C(O)C=C2)C=C1)C4=CC=CC=C4	O=P(C1=CC=C(OC2=CC=C(O)C=C2)C=C1)(C3=CC=CC=C3)C4=CC=CC=C4	0.8	21.3476
212032	CoPID212032	O=C(C1=CC(S(=O)(O)=O)=CC=C1)C2=CC=CC=C2	O=S(C1=CC=C(O)C=C1)(C2=CC=C(OC3=CC=C(C=CC=C4)C4=C3)C=C2)=O	0.8	21.3451
261090	CoPID261090	CCCCCCN(C1=O)C(C2=CC(S(=O)(O)=O)=CC(C2=C1C=C3)=C3C4=C5C(C6=CC(S(=O)(O)=O)=C5)=C(C(NC6=O)=O)C=C4)=O	SC(C=C1)=CC=C1SC(C=C2)=CC=C2SC3=C(C#N)C=CC=C3	0.9	21.3436
246580	CoPID246580	O=C(C1=CC=C(OC2=CC(C3=CC(OC)=C(S(=O)(O)=O)C=C3)=C(O)C=C2)C=C1)C4=CC=CC=C4	O=P(C1=CC=C(SC2=CC=C(SC3=CC=C(S)C=C3)C=C2)C=C1)(C4=CC=CC=C4)C5=CC=CC=C5	0.9	21.3417
218876	CoPID218876	O=C(C1=CC=C(OC2=CC=C(S(=O)(O)=O)C=C2)C=C1)C3=CC=CC=C3	O=S(C1=CC=C(S(=O)(O)=O)C=C1)(O)=O	0.8	21.3374
241005	CoPID241005	O=C(C1=CC(S(=O)(O)=O)=CC=C1)C2=CC=CC=C2	O=S(C1=CC=CC=C1C2=NC3=CC=C(C4=CC=C(N=CN5)C5=C4)C=C3N2)(C6=CC=CC=C6)=O	0.9	21.3342
212072	CoPID212072	O=C(C1=CC(S(=O)(O)=O)=CC=C1)C2=CC=CC=C2	N=P(OC1=CC=C(F)C=C1)OC2=CC=C(OC)C=C2	0.8	21.3287
246683	CoPID246683	O=C(C1=CC=C(OC2=CC(C3=CC(OC)=C(S(=O)(O)=O)C=C3)=C(O)C=C2)C=C1)C4=CC=CC=C4	O=P(C1=CC=C(OC2=CC=C(O)C=C2)C=C1)(C3=CC=CC=C3)C4=CC=CC=C4	0.9	21.3258
153990	CoPID153990	O=C(C1=CC(S(=O)(O)=O)=CC=C1)C2=CC=CC=C2	SC(C=C1)=CC=C1SC(C=C2)=CC=C2SC3=C(C#N)C=CC=C3	0.6	21.3256
218835	CoPID218835	O=C(C1=CC=C(OC2=CC=C(S(=O)(O)=O)C=C2)C=C1)C3=CC=CC=C3	O=C(C1=CC(C2=C(OC)C=CC=C2)=C(OC)C=C1)C(C=C3)=CC=C3OC4=CC=C(C(O)=O)C=C4	0.8	21.3175
212020	CoPID212020	O=C(C1=CC(S(=O)(O)=O)=CC=C1)C2=CC=CC=C2	O=C(C1=CC=C(CCCCCCCCCCCCCCCCCC)C=C1)C2=CC=CC=C2	0.8	21.3135
246619	CoPID246619	O=C(C1=CC=C(OC2=CC(C3=CC(OC)=C(S(=O)(O)=O)C=C3)=C(O)C=C2)C=C1)C4=CC=CC=C4	O=S(C1=CC=CC=C1)(C2=CC=C(OC3=CC=C(C=CC(O)=C4)C4=C3)C=C2)=O	0.9	21.3128
182957	CoPID182957	O=C(C1=CC(S(=O)(O)=O)=CC=C1)C2=CC=CC=C2	OC(C=C1)=CC=C1C(C)(C)C(C=C2)=CC=C2OC3=CC=C(C(C4=CC=CC=C4)=O)C=C3	0.7	21.3123
246591	CoPID246591	O=C(C1=CC=C(OC2=CC(C3=CC(OC)=C(S(=O)(O)=O)C=C3)=C(O)C=C2)C=C1)C4=CC=CC=C4	FC(C(C1=CC=C(C2=NC3=C(C=C(N=CS4)C4=C3)S2)C=C1)(C(F)(F)F)C5=CC=CC=C5)(F)F	0.9	21.3114
247875	CoPID247875	O=C(C1=CC=C(OC2=CC=C(S(=O)(O)=O)C=C2)C=C1)C3=CC=CC=C3	O=C(C1=CC=C(OC2=CC=C(C(C3=CC=CC=C3C(O)=O)C4=CC=C(O)C=C4)C=C2)C=C1)C5=CC=CC=C5	0.9	21.3055
246688	CoPID246688	O=C(C1=CC=C(OC2=CC(C3=CC(OC)=C(S(=O)(O)=O)C=C3)=C(O)C=C2)C=C1)C4=CC=CC=C4	OC(C=C1)=CC=C1C(C=C2)=CC=C2OC3=C(C#N)C=CC=C3	0.9	21.3027
212031	CoPID212031	O=C(C1=CC(S(=O)(O)=O)=CC=C1)C2=CC=CC=C2	OC1=CC=CC(OC2=CC=C(C=CC=C3)C3=C2)=C1C#N	0.8	21.2984
218764	CoPID218764	O=C(C1=CC=C(OC2=CC=C(S(=O)(O)=O)C=C2)C=C1)C3=CC=CC=C3	O=S(C(C=C1)=CC=C1OC(C=C2)=CC=C2C3=CC=C(O)C=C3)(C4=CC=CC=C4)=O	0.8	21.2976
217526	CoPID217526	O=C(C1=CC=C(OC2=CC(C3=CC(OC)=C(S(=O)(O)=O)C=C3)=C(O)C=C2)C=C1)C4=CC=CC=C4	O=S(C1=CC=CC=C1)(C2=CC=C(OC3=CC=C(O)C(C4=CC(F)=C(F)C=C4)=C3)C=C2)=O	0.8	21.2973
247323	CoPID247323	O=C(NC1=O)C2=C(C1=CC=C3)C3=C(C4=C(C=CC=C5C(N(C6=CC=C(OC7=CC(S(=O)(O)=O)=CC=C7)C=C6S(=O)(O)=O)C8=O)=O)C5=C8C=C4)C=C2	O=C(C1=CC=C(OC2=C(C=CC=C3C(N(C4=CC=CC=C4C)C5=O)=O)C3=C5C=C2)C=C1)C6=CC=CC=C6	0.9	21.2887
246748	CoPID246748	O=C(C1=CC=C(OC2=CC(C3=CC(OC)=C(S(=O)(O)=O)C=C3)=C(O)C=C2)C=C1)C4=CC=CC=C4	N#CC1=C(C2=CC=C(OC3=CC=CC=C3)C=C2)C=CC=C1	0.9	21.2797
212065	CoPID212065	O=C(C1=CC(S(=O)(O)=O)=CC=C1)C2=CC=CC=C2	O=S(C1=CC=C(O)C=C1)(C2=CC=C(OC3=CC=CC=C3)C=C2)=O	0.8	21.275
247839	CoPID247839	O=C(C1=CC=C(OC2=CC=C(S(=O)(O)=O)C=C2)C=C1)C3=CC=CC=C3	FC(C(C1=CC=CC=C1)(C(F)(F)F)C2=CC=C(C3=NC4=C(N3)C=C(C5=CC=C(NC=N6)C6=C5)C=C4)C=C2)(F)F	0.9	21.2745
240546	CoPID240546	O=C(NC1=O)C2=C(C1=CC=C3)C3=C(C4=C(C=CC=C5C(N(C6=CC(S(=O)(O)=O)=C(OC7=CC=CC=C7S(=O)(O)=O)C=C6)C8=O)=O)C5=C8C=C4)C=C2	O=C(NC1=O)C2=CC=C3C4=C2C1=CC=C4C(N(C5=CC=C(OC6=CC=CC=C6)C=C5)C3=O)=O	0.9	21.2697
246625	CoPID246625	O=C(C1=CC=C(OC2=CC(C3=CC(OC)=C(S(=O)(O)=O)C=C3)=C(O)C=C2)C=C1)C4=CC=CC=C4	O=C(C1=CC=C(C(C2=CC=C(OC3=CC=C(O)C(C(C)(C)C)=C3)C=C2)=O)C=C1)C4=CC=CC=C4	0.9	21.267
191233	CoPID191233	O=C(NC1=O)C2=CC=C3C4=C2C1=CC=C4C(N(C5=CC=C(OC6=CC(C=C(OC7=CC=CC=C7)C(S(=O)(O)=O)=C8)=C8C=C6S(=O)(O)=O)C=C5)C3=O)=O	O=C(NC1=O)C2=C(C1=CC=C3C(N(C4=CC=C(OC5=CC=CC=C5)C=C4)C6=O)=O)C3=C6C=C2	0.7	21.2667
246646	CoPID246646	O=C(C1=CC=C(OC2=CC(C3=CC(OC)=C(S(=O)(O)=O)C=C3)=C(O)C=C2)C=C1)C4=CC=CC=C4	O=S(C1=CC=CC=C1)(C2=CC=C(OC3=CC=C(O)C(C(C)(C)C)=C3)C=C2)=O	0.9	21.2667
218869	CoPID218869	O=C(C1=CC=C(OC2=CC=C(S(=O)(O)=O)C=C2)C=C1)C3=CC=CC=C3	O=S(C1=CC=C(OC2=CC=CC=C2C3=CC=C(F)C=C3)C=C1)(C4=CC=C(O)C=C4)=O	0.8	21.2658
78885	CoPID78885	O=S(C1=CC=CC(C2=CC=CC(S(=O)(O)=O)=C2)=C1)(O)=O	O=C(C1=CC=CC=C1)C2=CC=CC=C2	0.3	21.2646
241010	CoPID241010	O=C(C1=CC(S(=O)(O)=O)=CC=C1)C2=CC=CC=C2	OC1=C(OC2=CC=C(C(C3=CC(C(C4=CC=CC=C4)=O)=CC=C3)=O)C=C2)C=C5C(C6C=CC5C6)=C1	0.9	21.2533
211998	CoPID211998	O=C(C1=CC(S(=O)(O)=O)=CC=C1)C2=CC=CC=C2	CCC1=CC=C(OCCCC)C=C1	0.8	21.2532
218879	CoPID218879	O=C(C1=CC=C(OC2=CC=C(S(=O)(O)=O)C=C2)C=C1)C3=CC=CC=C3	OC1=CC=C(S(C2=CC=C(OC3=CC=C(C4=CC=CC=C4)C=C3)C=C2)(=O)=O)C=C1	0.8	21.25
247409	CoPID247409	O=C(NC1=O)C2=C(C1=CC=C3)C3=C(C4=C(C=CC=C5C(N(C6=CC=C(OC7=CC(S(=O)(O)=O)=CC=C7)C=C6S(=O)(O)=O)C8=O)=O)C5=C8C=C4)C=C2	O=C(C1=C2C(C=CC=C23)=CC=C1)N(C4=CC=CC(C(C5=CC=CC=C5)=O)=C4)C3=O	0.9	21.2449
218897	CoPID218897	O=C(C1=CC=C(OC2=CC=C(S(=O)(O)=O)C=C2)C=C1)C3=CC=CC=C3	N=P(OC1=CC=C(F)C=C1)OC2=CC=C(OC)C=C2	0.8	21.244
211996	CoPID211996	O=C(C1=CC(S(=O)(O)=O)=CC=C1)C2=CC=CC=C2	O=S(C1=CC=CC=C1)(C2=CC=C(OC3=CC=C(O)C(C(C)(C)C)=C3)C=C2)=O	0.8	21.2435
246658	CoPID246658	O=C(C1=CC=C(OC2=CC(C3=CC(OC)=C(S(=O)(O)=O)C=C3)=C(O)C=C2)C=C1)C4=CC=CC=C4	SC1=CC=C(SC2=CC=C(SC3=CC=C(S(C4=CC=CC=C4)(=O)=O)C=C3)C=C2)C=C1	0.9	21.2388
107924	CoPID107924	O=S(C1=CC=CC(C2=CC=CC(S(=O)(O)=O)=C2)=C1)(O)=O	OC1=CC=C(C(C2=CC=C(OC3=CC=C(C(C4=CC=CC=C4)=O)C=C3)C=C2)=O)C=C1	0.4	21.2352
95841	CoPID95841	O=C(C1=CC(S(=O)(O)=O)=CC=C1)C2=CC=CC=C2	O=C(C1=CC=CC=C1)C2=CC=C(C(C3=CC=CC=C3)=O)C=C2	0.4	21.2346
156759	CoPID156759	C=C(C1=CC(S(=O)(O)=O)=CC=C1)C2=CC=CC=C2	O=C(C1=C2C(C=CC=C23)=CC=C1)N(C4=CC=CC(C(C5=CC=CC=C5)=O)=C4)C3=O	0.6	21.2292
218812	CoPID218812	O=C(C1=CC=C(OC2=CC=C(S(=O)(O)=O)C=C2)C=C1)C3=CC=CC=C3	O=C(C1=CC=CC=C1)C(C=C2)=CC=C2OC(C(C)=C3)=C(C)C=C3C4=CC(C)=C(O)C(C)=C4	0.8	21.2234
218874	CoPID218874	O=C(C1=CC=C(OC2=CC=C(S(=O)(O)=O)C=C2)C=C1)C3=CC=CC=C3	OC1=CC=C(C(C2=CC=C(OC3=CC=C(C(C4=CC=CC=C4)=O)C=C3)C=C2)=O)C=C1	0.8	21.2195
246710	CoPID246710	O=C(C1=CC=C(OC2=CC(C3=CC(OC)=C(S(=O)(O)=O)C=C3)=C(O)C=C2)C=C1)C4=CC=CC=C4	O=C(C1=CC=CC=C1)C2=CC=CC=C2	0.9	21.2164
182925	CoPID182925	O=C(C1=CC(S(=O)(O)=O)=CC=C1)C2=CC=CC=C2	O=C(C1=CC=C(C(C2=CC=C(OC3=CC=C(O)C(C(C)(C)C)=C3)C=C2)=O)C=C1)C4=CC=CC=C4	0.7	21.2156
246681	CoPID246681	O=C(C1=CC=C(OC2=CC(C3=CC(OC)=C(S(=O)(O)=O)C=C3)=C(O)C=C2)C=C1)C4=CC=CC=C4	OC1=CC=CC(OC2=CC=C(C=CC=C3)C3=C2)=C1C#N	0.9	21.2068
246706	CoPID246706	O=C(C1=CC=C(OC2=CC(C3=CC(OC)=C(S(=O)(O)=O)C=C3)=C(O)C=C2)C=C1)C4=CC=CC=C4	O=S(C1=CC=CC=C1)(C2=CC=C(OC3=CC=C(C=C(O)C=C4)C4=C3)C=C2)=O	0.9	21.2053
182436	CoPID182436	O=C(NC1=O)C2=C(C1=CC=C3)C3=C(C4=C(C=CC=C5C(N(C6=CC(S(=O)(O)=O)=C(OC7=CC=CC=C7S(=O)(O)=O)C=C6)C8=O)=O)C5=C8C=C4)C=C2	O=C(NC1=O)C2=C(C1=CC=C3)C3=C(C4=C(C=CC=C5C(N(C6=CC=C(OC7=CC=CC=C7)C=C6)C8=O)=O)C5=C8C=C4)C=C2	0.7	21.2011
218862	CoPID218862	O=C(C1=CC=C(OC2=CC=C(S(=O)(O)=O)C=C2)C=C1)C3=CC=CC=C3	O=S(C1=CC=CC=C1)(C2=CC=C(OC3=CC=C(O)C(C4=CC=C(F)C=C4)=C3)C=C2)=O	0.8	21.1992
246692	CoPID246692	O=C(C1=CC=C(OC2=CC(C3=CC(OC)=C(S(=O)(O)=O)C=C3)=C(O)C=C2)C=C1)C4=CC=CC=C4	OC(C=C1)=CC=C1C2(C3=CC=C(OC4=CC=CC=C4C#N)C=C3)C5=C(C=CC=C5)C6=CC=CC=C26	0.9	21.195
246577	CoPID246577	O=C(C1=CC=C(OC2=CC(C3=CC(OC)=C(S(=O)(O)=O)C=C3)=C(O)C=C2)C=C1)C4=CC=CC=C4	O=S(C1=CC=C(O)C=C1)(C2=CC=C(OC3=CC=C(C(C(F)(F)F)(C(F)(F)F)C4=CC=CC=C4)C=C3)C=C2)=O	0.9	21.189
247371	CoPID247371	O=C(NC1=O)C2=C(C1=CC=C3)C3=C(C4=C(C=CC=C5C(N(C6=CC=C(OC7=CC(S(=O)(O)=O)=CC=C7)C=C6S(=O)(O)=O)C8=O)=O)C5=C8C=C4)C=C2	O=C(NC1=O)C2=CC=C3C4=C2C1=CC=C4C(N(C5=CC=C(OC6=CC=CC=C6)C=C5)C3=O)=O	0.9	21.1845
217579	CoPID217579	O=C(C1=CC=C(OC2=CC(C3=CC(OC)=C(S(=O)(O)=O)C=C3)=C(O)C=C2)C=C1)C4=CC=CC=C4	CC(C)(C1=CC=C(OC2=CC=C(S(C3=CC=CC=C3)(=O)=O)C=C2)C=C1)C4=CC=C(O)C=C4	0.8	21.1822
182958	CoPID182958	O=C(C1=CC(S(=O)(O)=O)=CC=C1)C2=CC=CC=C2	SC1=CC=C(SC2=CC=C(SC3=CC=C(S(C4=CC=CC=C4)(=O)=O)C=C3)C=C2)C=C1	0.7	21.1784
212026	CoPID212026	O=C(C1=CC(S(=O)(O)=O)=CC=C1)C2=CC=CC=C2	O=C(NC1=O)C2=CC=C3C4=C2C1=CC=C4C(N(C5=NC=NN5)C3=O)=O	0.8	21.1755
240473	CoPID240473	O=C(NC1=O)C2=C(C1=CC=C3)C3=C(C4=C(C=CC=C5C(N(C6=CC(S(=O)(O)=O)=C(OC7=CC=CC=C7S(=O)(O)=O)C=C6)C8=O)=O)C5=C8C=C4)C=C2	O=P(C1=CC=C(OC2=CC=C(C3=NNC(C4=C3C=CC=C4)=O)C=C2)C=C1)(C5=CC=CC=C5)C6=CC=CC=C6	0.9	21.1729
246699	CoPID246699	O=C(C1=CC=C(OC2=CC(C3=CC(OC)=C(S(=O)(O)=O)C=C3)=C(O)C=C2)C=C1)C4=CC=CC=C4	OC1=CC=C(C(C2=CC=C(OC3=CC=C(C(C4=CC=CC=C4)=O)C=C3)C=C2)=O)C=C1	0.9	21.1709
136974	CoPID136974	O=S(C1=CC=CC(C2=CC=CC(S(=O)(O)=O)=C2)=C1)(O)=O	OC1=CC=C(C(C2=CC=C(OC3=CC=C(C(C4=CC=CC=C4)=O)C=C3)C=C2)=O)C=C1	0.5	21.1668
247320	CoPID247320	O=C(NC1=O)C2=C(C1=CC=C3)C3=C(C4=C(C=CC=C5C(N(C6=CC=C(OC7=CC(S(=O)(O)=O)=CC=C7)C=C6S(=O)(O)=O)C8=O)=O)C5=C8C=C4)C=C2	O=C(NC1=O)C2=C(C1=CC=C3)C3=C(C4=C(C=CC=C5C(N(C6=CC=C(N(C7=CC=CC=C7)C8=CC=CC=C8)C=C6)C9=O)=O)C5=C9C=C4)C=C2	0.9	21.165
218856	CoPID218856	O=C(C1=CC=C(OC2=CC=C(S(=O)(O)=O)C=C2)C=C1)C3=CC=CC=C3	OC1=CC=CC(OC2=CC=C(C=CC=C3)C3=C2)=C1C#N	0.8	21.1648
183003	CoPID183003	O=C(C1=CC(S(=O)(O)=O)=CC=C1)C2=CC=CC=C2	OC1=CC=C(C(C(C=C2)=CC=C2OC(C=C3)=CC=C3C(CCC(O)=O)(C)C4=CC=CC=C4)=O)C=C1	0.7	21.1605
153951	CoPID153951	O=C(C1=CC(S(=O)(O)=O)=CC=C1)C2=CC=CC=C2	O=S(C1=CC=C(S(=O)(O)=O)C=C1)(O)=O	0.6	21.1552
246686	CoPID246686	O=C(C1=CC=C(OC2=CC(C3=CC(OC)=C(S(=O)(O)=O)C=C3)=C(O)C=C2)C=C1)C4=CC=CC=C4	O=S(C1=CC=CC=C1)(C2=CC=C(OC3=CC=C(O)C=C3)C=C2)=O	0.9	21.1533
240539	CoPID240539	O=C(NC1=O)C2=C(C1=CC=C3)C3=C(C4=C(C=CC=C5C(N(C6=CC(S(=O)(O)=O)=C(OC7=CC=CC=C7S(=O)(O)=O)C=C6)C8=O)=O)C5=C8C=C4)C=C2	O=C(N1)C2=C(C(C1=O)=CC=C3C4=O)C3=C(C(N4C5=CC=C(OC6=CC=C(C7=CC=C(OC8=CC=CC=C8)C=C7)C=C6)C=C5)=O)C=C2	0.9	21.1505

## Sheet: Td5
	CoPID	hydrophilic	hydrophobic	ratioLic	Td5RFPre
36026	CoPID36026	O=S(C1=C(C2=NC3=C(N2)C=C(C4=CC=C(NC=N5)C5=C4)C=C3)C=CC(C6=CC=CC(S(=O)(O)=O)=C6)=C1)(O)=O	O=C1C(C=CC=C2)=C2C(C(C=C3)=CC=C3OC(C=C4)=CC=C4C(N5)=NC(C5=C6)=CC=C6C7=CC(N=CN8)=C8C=C7)=NN1C9=CC=CC=C9	0.2	483.172
34276	CoPID34276	O=S(C1=CC=CC=C1C2=NC3=CC=C(C4=CC=C(N=CN5)C5=C4)C=C3N2)(C6=CC=C(S(=O)(O)=O)C=C6)=O	O=C1C(C=CC=C2)=C2C(C(C=C3)=CC=C3OC(C=C4)=CC=C4C(N5)=NC(C5=C6)=CC=C6C7=CC(N=CN8)=C8C=C7)=NN1C9=CC=CC=C9	0.2	478.23
34101	CoPID34101	O=S(C1=CC(S(=O)(O)=O)=CC2=C(C3=NC4=CC=C(C5=CC=C(NC=N6)C6=C5)C=C4N3)C=CC=C21)(O)=O	O=C1C(C=CC=C2)=C2C(C(C=C3)=CC=C3OC(C=C4)=CC=C4C(N5)=NC(C5=C6)=CC=C6C7=CC(N=CN8)=C8C=C7)=NN1C9=CC=CC=C9	0.2	477.377
17794	CoPID17794	O=S(C1=CC=CC(S(=O)(O)=O)=C1)(C2=CC=C(OC3=CC=C(O)C(C4=CC=CC=C4)=C3)C(S(=O)(O)=O)=C2)=O	O=S(C1=CC=C(OC2=CC=CC=C2C3=CC=C(F)C=C3)C=C1)(C4=CC=C(O)C=C4)=O	0.1	472.734
94126	CoPID94126	O=S(C1=C(C2=NC3=C(N2)C=C(C4=CC=C(NC=N5)C5=C4)C=C3)C=CC(C6=CC=CC(S(=O)(O)=O)=C6)=C1)(O)=O	O=C1C(C=CC=C2)=C2C(C(C=C3)=CC=C3OC(C=C4)=CC=C4C(N5)=NC(C5=C6)=CC=C6C7=CC(N=CN8)=C8C=C7)=NN1C9=CC=CC=C9	0.4	470.353
19185	CoPID19185	O=S(C1=CC(S(=O)(O)=O)=C(OC2=CC=CC=C2C3=CC=C(F)C=C3)C=C1)(C4=CC=C(O)C(S(=O)(O)=O)=C4)=O	O=S(C1=CC=CC=C1)(C2=CC=C(OC3=CC=C(O)C(C4=CC=CC=C4)=C3)C=C2)=O	0.1	470.265
48235	CoPID48235	O=S(C1=CC(S(=O)(O)=O)=C(OC2=CC=CC=C2C3=CC=C(F)C=C3)C=C1)(C4=CC=C(O)C(S(=O)(O)=O)=C4)=O	O=S(C1=CC=CC=C1)(C2=CC=C(OC3=CC=C(O)C(C4=CC=CC=C4)=C3)C=C2)=O	0.2	469.612
65076	CoPID65076	O=S(C1=C(C2=NC3=C(N2)C=C(C4=CC=C(NC=N5)C5=C4)C=C3)C=CC(C6=CC=CC(S(=O)(O)=O)=C6)=C1)(O)=O	O=C1C(C=CC=C2)=C2C(C(C=C3)=CC=C3OC(C=C4)=CC=C4C(N5)=NC(C5=C6)=CC=C6C7=CC(N=CN8)=C8C=C7)=NN1C9=CC=CC=C9	0.3	467.949
18135	CoPID18135	O=S(C1=CC=CC(S(=O)(O)=O)=C1)(C2=CC=C(OC3=CC=C(O)C(C4=CC=C(F)C=C4)=C3)C(S(=O)(O)=O)=C2)=O	O=S(C1=CC=CC=C1)(C2=CC=C(OC3=CC=C(O)C(C4=CC=CC=C4)=C3)C=C2)=O	0.1	467.548
110	CoPID110	O=S(C1=CC=CC(S(=O)(O)=O)=C1)(C2=CC=C(OC3=CC=C(O)C(C4=CC(F)=C(F)C=C4)=C3)C(S(=O)(O)=O)=C2)=O	O=S(C1=CC=CC=C1)(C2=CC=C(OC3=CC=C(O)C(C4=CC=CC=C4)=C3)C=C2)=O	0.1	466.822
19226	CoPID19226	O=S(C1=CC(S(=O)(O)=O)=C(OC2=CC=CC=C2C3=CC=C(F)C=C3)C=C1)(C4=CC=C(O)C(S(=O)(O)=O)=C4)=O	O=C1C(C=CC=C2)=C2C(C(C=C3)=CC=C3OC(C=C4)=CC=C4C(N5)=NC(C5=C6)=CC=C6C7=CC(N=CN8)=C8C=C7)=NN1C9=CC=CC=C9	0.1	465.823
18176	CoPID18176	O=S(C1=CC=CC(S(=O)(O)=O)=C1)(C2=CC=C(OC3=CC=C(O)C(C4=CC=C(F)C=C4)=C3)C(S(=O)(O)=O)=C2)=O	O=C1C(C=CC=C2)=C2C(C(C=C3)=CC=C3OC(C=C4)=CC=C4C(N5)=NC(C5=C6)=CC=C6C7=CC(N=CN8)=C8C=C7)=NN1C9=CC=CC=C9	0.1	465.769
21994	CoPID21994	O=S(C1=CC=C(O)C(S(=O)(O)=O)=C1)(C2=CC(S(=O)(O)=O)=C(OC3=CC=C(C(C(F)(F)F)(C(F)(F)F)C4=CC=C(O)C=C4)C=C3)C=C2)=O	O=S(C1=CC=C(OC2=CC=CC=C2C3=CC=C(F)C=C3)C=C1)(C4=CC=C(O)C=C4)=O	0.1	465.349
9426	CoPID9426	OC1=C(F)C(F)=C(C2=C(F)C(F)=C(OC3=CC(S(=O)(O)=O)=CC4=C3C=CC=C4)C(F)=C2F)C(F)=C1F	O=C1C(C=CC=C2)=C2C(C(C=C3)=CC=C3OC(C=C4)=CC=C4C(N5)=NC(C5=C6)=CC=C6C7=CC(N=CN8)=C8C=C7)=NN1C9=CC=CC=C9	0.1	465.066
16569	CoPID16569	O=S(C1=CC=CC(S(=O)(O)=O)=C1)(C2=CC=C(OC3=CC=C(C(C(F)(F)F)(C(F)(F)F)C4=CC=C(O)C=C4)C=C3)C(S(=O)(O)=O)=C2)=O	O=S(C1=CC=C(OC2=CC=CC=C2C3=CC=C(F)C=C3)C=C1)(C4=CC=C(O)C=C4)=O	0.1	464.663
151	CoPID151	O=S(C1=CC=CC(S(=O)(O)=O)=C1)(C2=CC=C(OC3=CC=C(O)C(C4=CC(F)=C(F)C=C4)=C3)C(S(=O)(O)=O)=C2)=O	O=C1C(C=CC=C2)=C2C(C(C=C3)=CC=C3OC(C=C4)=CC=C4C(N5)=NC(C5=C6)=CC=C6C7=CC(N=CN8)=C8C=C7)=NN1C9=CC=CC=C9	0.1	463.881
92376	CoPID92376	O=S(C1=CC=CC=C1C2=NC3=CC=C(C4=CC=C(N=CN5)C5=C4)C=C3N2)(C6=CC=C(S(=O)(O)=O)C=C6)=O	O=C1C(C=CC=C2)=C2C(C(C=C3)=CC=C3OC(C=C4)=CC=C4C(N5)=NC(C5=C6)=CC=C6C7=CC(N=CN8)=C8C=C7)=NN1C9=CC=CC=C9	0.4	463.843
1551	CoPID1551	OC1=CC(OC(C(F)=C2F)=C(F)C(F)=C2C3=C(F)C(F)=CC(F)=C3F)=CC(SC(F)(C(OC(F)(C(F)(S(=O)(O)=O)F)F)(F)F)F)=C1	O=C1C(C=CC=C2)=C2C(C(C=C3)=CC=C3OC(C=C4)=CC=C4C(N5)=NC(C5=C6)=CC=C6C7=CC(N=CN8)=C8C=C7)=NN1C9=CC=CC=C9	0.1	463.503
92201	CoPID92201	O=S(C1=CC(S(=O)(O)=O)=CC2=C(C3=NC4=CC=C(C5=CC=C(NC=N6)C6=C5)C=C4N3)C=CC=C21)(O)=O	O=C1C(C=CC=C2)=C2C(C(C=C3)=CC=C3OC(C=C4)=CC=C4C(N5)=NC(C5=C6)=CC=C6C7=CC(N=CN8)=C8C=C7)=NN1C9=CC=CC=C9	0.4	463.165
63326	CoPID63326	O=S(C1=CC=CC=C1C2=NC3=CC=C(C4=CC=C(N=CN5)C5=C4)C=C3N2)(C6=CC=C(S(=O)(O)=O)C=C6)=O	O=C1C(C=CC=C2)=C2C(C(C=C3)=CC=C3OC(C=C4)=CC=C4C(N5)=NC(C5=C6)=CC=C6C7=CC(N=CN8)=C8C=C7)=NN1C9=CC=CC=C9	0.3	462.941
21819	CoPID21819	O=S(C1=CC=C(O)C(S(=O)(O)=O)=C1)(C2=CC(S(=O)(O)=O)=C(OC3=CC=C(C=C(O)C=C4)C4=C3)C=C2)=O	O=S(C1=CC=C(OC2=CC=CC=C2C3=CC=C(F)C=C3)C=C1)(C4=CC=C(O)C=C4)=O	0.1	462.724
11176	CoPID11176	NC1=CC=C(S(=O)(O)=O)C(NC(C2=CC(C(NC3=CC=C(S(NS(C4=CC=CC=C4)(=O)=O)(=O)=O)C=C3)=O)=CC(C=O)=C2)=O)=C1	O=C1C(C=CC=C2)=C2C(C(C=C3)=CC=C3OC(C=C4)=CC=C4C(N5)=NC(C5=C6)=CC=C6C7=CC(N=CN8)=C8C=C7)=NN1C9=CC=CC=C9	0.1	462.394
25701	CoPID25701	O=S(C1=CC(S(=O)(O)=O)=CC=C1)(C2=CC=C(OC3=CC=C(C4(NC(C5=C4C=CC=C5)=O)C6=CC=C(O)C=C6)C=C3)C(S(=O)(O)=O)=C2)=O	O=C1C(C=CC=C2)=C2C(C(C=C3)=CC=C3OC(C=C4)=CC=C4C(N5)=NC(C5=C6)=CC=C6C7=CC(N=CN8)=C8C=C7)=NN1C9=CC=CC=C9	0.1	461.049
18144	CoPID18144	O=S(C1=CC=CC(S(=O)(O)=O)=C1)(C2=CC=C(OC3=CC=C(O)C(C4=CC=C(F)C=C4)=C3)C(S(=O)(O)=O)=C2)=O	O=S(C1=CC=C(OC2=CC=CC=C2C3=CC=C(F)C=C3)C=C1)(C4=CC=C(O)C=C4)=O	0.1	460.79
51601	CoPID51601	O=S(C1=CC2=C(C=C1)C=CC=C2C3=NC(C=C(SC=N4)C4=C5)=C5S3)(O)=O	O=C1C(C=CC=C2)=C2C(C(C=C3)=CC=C3OC(C=C4)=CC=C4C(N5)=NC(C5=C6)=CC=C6C7=CC(N=CN8)=C8C=C7)=NN1C9=CC=CC=C9	0.2	460.578
38476	CoPID38476	OC1=C(F)C(F)=C(C2=C(F)C(F)=C(OC3=CC(S(=O)(O)=O)=CC4=C3C=CC=C4)C(F)=C2F)C(F)=C1F	O=C1C(C=CC=C2)=C2C(C(C=C3)=CC=C3OC(C=C4)=CC=C4C(N5)=NC(C5=C6)=CC=C6C7=CC(N=CN8)=C8C=C7)=NN1C9=CC=CC=C9	0.2	460.248
63151	CoPID63151	O=S(C1=CC(S(=O)(O)=O)=CC2=C(C3=NC4=CC=C(C5=CC=C(NC=N6)C6=C5)C=C4N3)C=CC=C21)(O)=O	O=C1C(C=CC=C2)=C2C(C(C=C3)=CC=C3OC(C=C4)=CC=C4C(N5)=NC(C5=C6)=CC=C6C7=CC(N=CN8)=C8C=C7)=NN1C9=CC=CC=C9	0.3	460.181
23035	CoPID23035	O=S(C1=CC=C(O)C(S(=O)(O)=O)=C1)(C2=CC=C(OC3=CC=CC=C3)C(S(=O)(O)=O)=C2)=O	O=S(C1=CC=CC=C1)(C2=CC=C(OC3=CC=C(O)C(C4=CC=CC=C4)=C3)C=C2)=O	0.1	460.099
48276	CoPID48276	O=S(C1=CC(S(=O)(O)=O)=C(OC2=CC=CC=C2C3=CC=C(F)C=C3)C=C1)(C4=CC=C(O)C(S(=O)(O)=O)=C4)=O	O=C1C(C=CC=C2)=C2C(C(C=C3)=CC=C3OC(C=C4)=CC=C4C(N5)=NC(C5=C6)=CC=C6C7=CC(N=CN8)=C8C=C7)=NN1C9=CC=CC=C9	0.2	459.928
2426	CoPID2426	O=S(C1=CC(S(=O)(O)=O)=C(OC2=CC=C(C3=CC=C(C=C3)O)C=C2)C=C1)(C4=CC=CC(S(=O)(O)=O)=C4)=O	O=C1C(C=CC=C2)=C2C(C(C=C3)=CC=C3OC(C=C4)=CC=C4C(N5)=NC(C5=C6)=CC=C6C7=CC(N=CN8)=C8C=C7)=NN1C9=CC=CC=C9	0.1	459.654
21810	CoPID21810	O=S(C1=CC=C(O)C(S(=O)(O)=O)=C1)(C2=CC(S(=O)(O)=O)=C(OC3=CC=C(C=C(O)C=C4)C4=C3)C=C2)=O	O=S(C1=CC=CC=C1)(C2=CC=C(OC3=CC=C(O)C(C4=CC=CC=C4)=C3)C=C2)=O	0.1	459.507
6060	CoPID6060	O=P(C1=CC=C(O)C=C1)(C2=CC=CC=C2)C(C=C3)=CC=C3OC(C(S(=O)(O)=O)=C4)=CC=C4S(C5=CC(S(=O)(O)=O)=CC=C5)(=O)=O	O=S(C1=CC=CC=C1)(C2=CC=C(OC3=CC=C(O)C(C4=CC=CC=C4)=C3)C=C2)=O	0.1	459.41

## Sheet: MePerm
	CoPID	hydrophilic	hydrophobic	ratioLic	MePermRFPre
125199	CoPID125199	OC1=CC=C(OC2=CC=C(OC3=C(C(C4=CC=C(OC5=CC=C(S(=O)(O)=O)C=C5)C=C4)=O)C=CC=C3)C=C2)C=C1	O=S(C1=CC=CC=C1)(C2=CC=C(OC3=CC=C(OC4=CC=C(O)C=C4)C=C3)C=C2)=O	0.5	0.24867
44501	CoPID44501	O=C(C1=CC=C(OC2=CC=C(S(=O)(O)=O)C=C2)C=C1)C3=CC=CC=C3	OC1=C(F)C(F)=C(C2=C(F)C(F)=C(OC3=CC=C(C(C(F)(F)F)(C(F)(F)F)C4=CC=CC=C4)C=C3)C(F)=C2F)C(F)=C1F	0.2	0.283138
46426	CoPID46426	O=P(C1=CC=C(OC2=CC=C(O)C=C2)C=C1)(C3=CC=CC(S(=O)(O)=O)=C3)C4=CC=CC=C4	OC1=C(F)C(F)=C(C2=C(F)C(F)=C(OC3=CC=C(C(C(F)(F)F)(C(F)(F)F)C4=CC=CC=C4)C=C3)C(F)=C2F)C(F)=C1F	0.2	0.307106
6001	CoPID6001	O=P(C1=CC=C(O)C=C1)(C2=CC=CC=C2)C(C=C3)=CC=C3OC(C(S(=O)(O)=O)=C4)=CC=C4S(C5=CC(S(=O)(O)=O)=CC=C5)(=O)=O	OC1=C(F)C(F)=C(C2=C(F)C(F)=C(OC3=CC=C(C(C(F)(F)F)(C(F)(F)F)C4=CC=CC=C4)C=C3)C(F)=C2F)C(F)=C1F	0.1	0.315565
9501	CoPID9501	O=S(C1=CC(C2=NC3=C(C=C(N=CS4)C4=C3)S2)=CC5=C(S(=O)(O)=O)C=CC=C51)(O)=O	OC1=C(F)C(F)=C(C2=C(F)C(F)=C(OC3=CC=C(C(C(F)(F)F)(C(F)(F)F)C4=CC=CC=C4)C=C3)C(F)=C2F)C(F)=C1F	0.1	0.321829
17376	CoPID17376	O=P(C1=CC=C(OC2=CC=C(O)C=C2)C=C1)(C3=CC=CC(S(=O)(O)=O)=C3)C4=CC=CC=C4	OC1=C(F)C(F)=C(C2=C(F)C(F)=C(OC3=CC=C(C(C(F)(F)F)(C(F)(F)F)C4=CC=CC=C4)C=C3)C(F)=C2F)C(F)=C1F	0.1	0.325508
26476	CoPID26476	NC1=CC(NC(C2=CC(C=O)=CC=C2)=O)=CC=C1S(=O)(O)=O	OC1=C(F)C(F)=C(C2=C(F)C(F)=C(OC3=CC=C(C(C(F)(F)F)(C(F)(F)F)C4=CC=CC=C4)C=C3)C(F)=C2F)C(F)=C1F	0.1	0.328818
43276	CoPID43276	O=C(C1=CC=C(OC2=CC(C3=CC(OC)=C(S(=O)(O)=O)C=C3)=C(O)C=C2)C=C1)C4=CC=CC=C4	OC1=C(F)C(F)=C(C2=C(F)C(F)=C(OC3=CC=C(C(C(F)(F)F)(C(F)(F)F)C4=CC=CC=C4)C=C3)C(F)=C2F)C(F)=C1F	0.2	0.338852
95449	CoPID95449	OC1=CC=C(OC2=CC=C(OC3=CC=C(OC4=CC=CC=C4C(C5=CC=C(CCCS(=O)(O)=O)C=C5)=O)C=C3)C=C2)C=C1	O=S(C1=CC=CC=C1)(C2=CC=C(OC3=CC=C(OC4=CC=C(O)C=C4)C=C3)C=C2)=O	0.4	0.339039
53351	CoPID53351	N=P(OC1=CC=C(F)C=C1)OC2=CC=C(OCCCCS(=O)(O)=O)C=C2	O=C1C(C=CC=C2)=C2C(C(C=C3)=CC=C3OC(C=C4)=CC=C4C(N5)=NC(C5=C6)=CC=C6C7=CC(N=CN8)=C8C=C7)=NN1C9=CC=CC=C9	0.2	0.340082
27001	CoPID27001	O=S(C1=CC=CC(S(=O)(O)=O)=C1)(C2=CC(S(=O)(O)=O)=C(SC3=CC(C=CC(S)=C4)=C4C=C3)C=C2)=O	OC1=C(F)C(F)=C(C2=C(F)C(F)=C(OC3=CC=C(C(C(F)(F)F)(C(F)(F)F)C4=CC=CC=C4)C=C3)C(F)=C2F)C(F)=C1F	0.1	0.34462
27526	CoPID27526	NC1=CC=C(S(=O)(O)=O)C(NC(C2=CC=C(OC3=CC=C(C=O)C=C3)C=C2)=O)=C1	OC1=C(F)C(F)=C(C2=C(F)C(F)=C(OC3=CC=C(C(C(F)(F)F)(C(F)(F)F)C4=CC=CC=C4)C=C3)C(F)=C2F)C(F)=C1F	0.1	0.344976
96149	CoPID96149	OC1=CC=C(OC2=CC=C(OC3=C(C(C4=CC=C(OC5=CC=C(S(=O)(O)=O)C=C5)C=C4)=O)C=CC=C3)C=C2)C=C1	O=S(C1=CC=CC=C1)(C2=CC=C(OC3=CC=C(OC4=CC=C(O)C=C4)C=C3)C=C2)=O	0.4	0.351137
21051	CoPID21051	OC1=CC=C(S(C2=C(OC3=CC=C(C(C4=CC(S(=O)(O)=O)=CC=C4)=O)C=C3S(=O)(O)=O)C=C(OC5=CC=CC=C5)C=C2)(=O)=O)C=C1	OC1=C(F)C(F)=C(C2=C(F)C(F)=C(OC3=CC=C(C(C(F)(F)F)(C(F)(F)F)C4=CC=CC=C4)C=C3)C(F)=C2F)C(F)=C1F	0.1	0.351773
12401	CoPID12401	CCC1=CC=C(OCCCCS(=O)(O)=O)C=C1	O=C1C(C=CC=C2)=C2C(C(C=C3)=CC=C3OC(C=C4)=CC=C4C(N5)=NC(C5=C6)=CC=C6C7=CC(N=CN8)=C8C=C7)=NN1C9=CC=CC=C9	0.1	0.352031
66399	CoPID66399	OC1=CC=C(OC2=CC=C(OC3=CC=C(OC4=CC=CC=C4C(C5=CC=C(CCCS(=O)(O)=O)C=C5)=O)C=C3)C=C2)C=C1	O=S(C1=CC=CC=C1)(C2=CC=C(OC3=CC=C(OC4=CC=C(O)C=C4)C=C3)C=C2)=O	0.3	0.352378
14226	CoPID14226	O=C(C1=CC=C(OC2=CC(C3=CC(OC)=C(S(=O)(O)=O)C=C3)=C(O)C=C2)C=C1)C4=CC=CC=C4	OC1=C(F)C(F)=C(C2=C(F)C(F)=C(OC3=CC=C(C(C(F)(F)F)(C(F)(F)F)C4=CC=CC=C4)C=C3)C(F)=C2F)C(F)=C1F	0.1	0.355144
14401	CoPID14401	SC(C=C1)=CC=C1SC(C=C2)=CC=C2SC(C(S(=O)(O)=O)=C3)=CC=C3S(C4=CC(S(=O)(O)=O)=CC=C4)(=O)=O	OC1=C(F)C(F)=C(C2=C(F)C(F)=C(OC3=CC=C(C(C(F)(F)F)(C(F)(F)F)C4=CC=CC=C4)C=C3)C(F)=C2F)C(F)=C1F	0.1	0.359795
124499	CoPID124499	OC1=CC=C(OC2=CC=C(OC3=CC=C(OC4=CC=CC=C4C(C5=CC=C(CCCS(=O)(O)=O)C=C5)=O)C=C3)C=C2)C=C1	O=S(C1=CC=CC=C1)(C2=CC=C(OC3=CC=C(OC4=CC=C(O)C=C4)C=C3)C=C2)=O	0.5	0.366394
75476	CoPID75476	O=P(C1=CC=C(OC2=CC=C(O)C=C2)C=C1)(C3=CC=CC(S(=O)(O)=O)=C3)C4=CC=CC=C4	OC1=C(F)C(F)=C(C2=C(F)C(F)=C(OC3=CC=C(C(C(F)(F)F)(C(F)(F)F)C4=CC=CC=C4)C=C3)C(F)=C2F)C(F)=C1F	0.3	0.367455
18426	CoPID18426	O=C(C1=CC(S(=O)(O)=O)=CC(C=O)=C1)NC(C=C2)=CC=C2OC3=C(C#N)C(OC4=CC=C(N)C=C4)=CC=C3	OC1=C(F)C(F)=C(C2=C(F)C(F)=C(OC3=CC=C(C(C(F)(F)F)(C(F)(F)F)C4=CC=CC=C4)C=C3)C(F)=C2F)C(F)=C1F	0.1	0.373401
28401	CoPID28401	OC(C=C1)=CC=C1OC(C=C2)=CC=C2OC3=C(C(C4=CC=C(OCCCOC5=CC=C(S(=O)(O)=O)C=C5)C=C4)=O)C=CC=C3	OC1=C(F)C(F)=C(C2=C(F)C(F)=C(OC3=CC=C(C(C(F)(F)F)(C(F)(F)F)C4=CC=CC=C4)C=C3)C(F)=C2F)C(F)=C1F	0.1	0.377616
37501	CoPID37501	SC1=CC=C(SC2=CC=C(SC3=CC=C(P(C4=CC=CC(S(=O)(O)=O)=C4)(C5=CC=CC=C5)=O)C=C3)C=C2)C=C1	OC1=C(F)C(F)=C(C2=C(F)C(F)=C(OC3=CC=C(C(C(F)(F)F)(C(F)(F)F)C4=CC=CC=C4)C=C3)C(F)=C2F)C(F)=C1F	0.2	0.38176
3901	CoPID3901	O=P(C1=CC=CC(S(=O)(O)=O)=C1)(C2=CC=CC=C2)C3=CC=C(C(S(=O)(O)=O)=C3)OC4=CC=C(C=C4)C5=NNC(C6=C5C=CC=C6)=O	OC1=C(F)C(F)=C(C2=C(F)C(F)=C(OC3=CC=C(C(C(F)(F)F)(C(F)(F)F)C4=CC=CC=C4)C=C3)C(F)=C2F)C(F)=C1F	0.1	0.382253
5651	CoPID5651	O=C(C1=CC=C(OC2=CC=C(P(C3=CC=C(O)C=C3)(C4=CC=CC=C4)=O)C=C2)C(S(=O)(O)=O)=C1)C5=CC(S(=O)(O)=O)=CC=C5	OC1=C(F)C(F)=C(C2=C(F)C(F)=C(OC3=CC=C(C(C(F)(F)F)(C(F)(F)F)C4=CC=CC=C4)C=C3)C(F)=C2F)C(F)=C1F	0.1	0.382735
26651	CoPID26651	O=S(C1=CC=CC=C1/C=C/C(C=C2)=C(S(=O)(O)=O)C=C2N3N=NC(C4=CC(C5=CNN=N5)=CC=C4)=C3)(O)=O	OC1=C(F)C(F)=C(C2=C(F)C(F)=C(OC3=CC=C(C(C(F)(F)F)(C(F)(F)F)C4=CC=CC=C4)C=C3)C(F)=C2F)C(F)=C1F	0.1	0.386423
66408	CoPID66408	OC1=CC=C(OC2=CC=C(OC3=CC=C(OC4=CC=CC=C4C(C5=CC=C(CCCS(=O)(O)=O)C=C5)=O)C=C3)C=C2)C=C1	SC1=CC=C(SC2=CC=C(SC3=CC=C(S(C4=CC=CC=C4)(=O)=O)C=C3)C=C2)C=C1	0.3	0.386481
6176	CoPID6176	OC1=C(OC2=CC=C(C(C3=CC(C(C4=CC=CC=C4)=O)=CC=C3)=O)C=C2)C=C5C(C=C(S(=O)(O)=O)C=C5)=C1	OC1=C(F)C(F)=C(C2=C(F)C(F)=C(OC3=CC=C(C(C(F)(F)F)(C(F)(F)F)C4=CC=CC=C4)C=C3)C(F)=C2F)C(F)=C1F	0.1	0.386564
55626	CoPID55626	NC1=CC(NC(C2=CC(C=O)=CC=C2)=O)=CC=C1S(=O)(O)=O	O=C1C(C=CC=C2)=C2C(C(C=C3)=CC=C3OC(C=C4)=CC=C4C(N5)=NC(C5=C6)=CC=C6C7=CC(N=CN8)=C8C=C7)=NN1C9=CC=CC=C9	0.2	0.38658
8451	CoPID8451	SC1=CC=C(SC2=CC=C(SC3=CC=C(P(C4=CC=CC(S(=O)(O)=O)=C4)(C5=CC=CC=C5)=O)C=C3)C=C2)C=C1	OC1=C(F)C(F)=C(C2=C(F)C(F)=C(OC3=CC=C(C(C(F)(F)F)(C(F)(F)F)C4=CC=CC=C4)C=C3)C(F)=C2F)C(F)=C1F	0.1	0.38661
52376	CoPID52376	OC1=C(OC2=CC=C(C(C3=CC(C(C4=CC=CC=C4)=O)=CC=C3)=O)C=C2)C=C5C(C=CC(S(=O)(O)=O)=C5)=C1	OC1=C(F)C(F)=C(C2=C(F)C(F)=C(OC3=CC=C(C(C(F)(F)F)(C(F)(F)F)C4=CC=CC=C4)C=C3)C(F)=C2F)C(F)=C1F	0.2	0.389453
23326	CoPID23326	OC1=C(OC2=CC=C(C(C3=CC(C(C4=CC=CC=C4)=O)=CC=C3)=O)C=C2)C=C5C(C=CC(S(=O)(O)=O)=C5)=C1	OC1=C(F)C(F)=C(C2=C(F)C(F)=C(OC3=CC=C(C(C(F)(F)F)(C(F)(F)F)C4=CC=CC=C4)C=C3)C(F)=C2F)C(F)=C1F	0.1	0.39088
115514	CoPID115514	OC(C=C1)=CC=C1OC(C=C2)=CC=C2OC3=C(C(C4=CC=C(OCCCOC5=CC=C(S(=O)(O)=O)C=C5)C=C4)=O)C=CC=C3	O=S(C(C=C1)=CC=C1OC(C=C2)=CC=C2C3=CC=C(O)C=C3)(C4=CC=CC=C4)=O	0.4	0.391717
86496	CoPID86496	OC(C=C1)=CC=C1OC(C=C2)=CC=C2OC3=C(C(C4=CC=C(OCCCOC5=CC=C(S(=O)(O)=O)C=C5)C=C4)=O)C=CC=C3	OC1=CC=C(OC2=CC=C(OC3=CC=C(S(C4=CC=CC=C4)(=O)=O)C=C3)C=C2)C=C1	0.3	0.393286
11076	CoPID11076	NC1=CC=C(S(=O)(O)=O)C(NC(C2=CC(C(NC3=CC=C(S(NS(C4=CC=CC=C4)(=O)=O)(=O)=O)C=C3)=O)=CC(C=O)=C2)=O)=C1	OC1=C(F)C(F)=C(C2=C(F)C(F)=C(OC3=CC=C(C(C(F)(F)F)(C(F)(F)F)C4=CC=CC=C4)C=C3)C(F)=C2F)C(F)=C1F	0.1	0.395898
1451	CoPID1451	OC1=CC(OC(C(F)=C2F)=C(F)C(F)=C2C3=C(F)C(F)=CC(F)=C3F)=CC(SC(F)(C(OC(F)(C(F)(S(=O)(O)=O)F)F)(F)F)F)=C1	OC1=C(F)C(F)=C(C2=C(F)C(F)=C(OC3=CC=C(C(C(F)(F)F)(C(F)(F)F)C4=CC=CC=C4)C=C3)C(F)=C2F)C(F)=C1F	0.1	0.396614
72326	CoPID72326	O=C(C1=CC=C(OC2=CC(C3=CC(OC)=C(S(=O)(O)=O)C=C3)=C(O)C=C2)C=C1)C4=CC=CC=C4	OC1=C(F)C(F)=C(C2=C(F)C(F)=C(OC3=CC=C(C(C(F)(F)F)(C(F)(F)F)C4=CC=CC=C4)C=C3)C(F)=C2F)C(F)=C1F	0.3	0.400742
46176	CoPID46176	O=C(C1=CC=C(OC2=CC=C(C(C(F)(F)F)(C(F)(F)F)C3=CC=C(O)C=C3)C=C2)C(S(=O)(O)=O)=C1)C4=CC=CC(S(=O)(O)=O)=C4	O=C1C(C=CC=C2)=C2C(C(C=C3)=CC=C3OC(C=C4)=CC=C4C(N5)=NC(C5=C6)=CC=C6C7=CC(N=CN8)=C8C=C7)=NN1C9=CC=CC=C9	0.2	0.403048
35226	CoPID35226	OC1=C(OC2=CC=C(C(C3=CC(C(C4=CC=CC=C4)=O)=CC=C3)=O)C=C2)C=C5C(C=C(S(=O)(O)=O)C=C5)=C1	OC1=C(F)C(F)=C(C2=C(F)C(F)=C(OC3=CC=C(C(C(F)(F)F)(C(F)(F)F)C4=CC=CC=C4)C=C3)C(F)=C2F)C(F)=C1F	0.2	0.40562
8101	CoPID8101	O=C(NC1=O)C2=C(C1=CC=C3)C3=C(C4=C(C=CC=C5C(N(C6=CC(S(=O)(O)=O)=C(OC7=CC=CC=C7S(=O)(O)=O)C=C6)C8=O)=O)C5=C8C=C4)C=C2	OC1=C(F)C(F)=C(C2=C(F)C(F)=C(OC3=CC=C(C(C(F)(F)F)(C(F)(F)F)C4=CC=CC=C4)C=C3)C(F)=C2F)C(F)=C1F	0.1	0.405688
41451	CoPID41451	CCC1=CC=C(OCCCCS(=O)(O)=O)C=C1	O=C1C(C=CC=C2)=C2C(C(C=C3)=CC=C3OC(C=C4)=CC=C4C(N5)=NC(C5=C6)=CC=C6C7=CC(N=CN8)=C8C=C7)=NN1C9=CC=CC=C9	0.2	0.406965
7401	CoPID7401	O=S(C1=CC=CC(S(=O)(O)=O)=C1)(C2=CC=C(OC3=CC=C(C(C)(C)C4=CC=C(O)C(C5=CC=CC=C5)=C4)C=C3C6=CC=CC=C6)C(S(=O)(O)=O)=C2)=O	OC1=C(F)C(F)=C(C2=C(F)C(F)=C(OC3=CC=C(C(C(F)(F)F)(C(F)(F)F)C4=CC=CC=C4)C=C3)C(F)=C2F)C(F)=C1F	0.1	0.407183
43451	CoPID43451	SC(C=C1)=CC=C1SC(C=C2)=CC=C2SC(C(S(=O)(O)=O)=C3)=CC=C3S(C4=CC(S(=O)(O)=O)=CC=C4)(=O)=O	OC1=C(F)C(F)=C(C2=C(F)C(F)=C(OC3=CC=C(C(C(F)(F)F)(C(F)(F)F)C4=CC=CC=C4)C=C3)C(F)=C2F)C(F)=C1F	0.2	0.409233
46076	CoPID46076	O=C(C1=CC=C(OC2=CC=C(C(C(F)(F)F)(C(F)(F)F)C3=CC=C(O)C=C3)C=C2)C(S(=O)(O)=O)=C1)C4=CC=CC(S(=O)(O)=O)=C4	OC1=C(F)C(F)=C(C2=C(F)C(F)=C(OC3=CC=C(C(C(F)(F)F)(C(F)(F)F)C4=CC=CC=C4)C=C3)C(F)=C2F)C(F)=C1F	0.2	0.40992
154249	CoPID154249	OC1=CC=C(OC2=CC=C(OC3=C(C(C4=CC=C(OC5=CC=C(S(=O)(O)=O)C=C5)C=C4)=O)C=CC=C3)C=C2)C=C1	O=S(C1=CC=CC=C1)(C2=CC=C(OC3=CC=C(OC4=CC=C(O)C=C4)C=C3)C=C2)=O	0.6	0.410322
23076	CoPID23076	O=S(C1=CC=C(O)C(S(=O)(O)=O)=C1)(C2=CC=C(OC3=CC=CC=C3)C(S(=O)(O)=O)=C2)=O	O=C1C(C=CC=C2)=C2C(C(C=C3)=CC=C3OC(C=C4)=CC=C4C(N5)=NC(C5=C6)=CC=C6C7=CC(N=CN8)=C8C=C7)=NN1C9=CC=CC=C9	0.1	0.410501
12476	CoPID12476	O=S(C1=CC=CC=C1)(C2=CC=C(OC3=CC(C4=CC=CC(OC5=CC=C(C(C6=CC(S(=O)(O)=O)=C(F)C=C6)=O)C=C5S(=O)(O)=O)=C4)=C(O)C=C3)C=C2)=O	OC1=C(F)C(F)=C(C2=C(F)C(F)=C(OC3=CC=C(C(C(F)(F)F)(C(F)(F)F)C4=CC=CC=C4)C=C3)C(F)=C2F)C(F)=C1F	0.1	0.411873
12826	CoPID12826	O=C(C1=CC=C(OC2=CC=C(C(C3=CC=CC=C3C(O)=O)C4=CC=C(O)C=C4)C=C2)C(S(=O)(O)=O)=C1)C5=CC(S(=O)(O)=O)=CC=C5	OC1=C(F)C(F)=C(C2=C(F)C(F)=C(OC3=CC=C(C(C(F)(F)F)(C(F)(F)F)C4=CC=CC=C4)C=C3)C(F)=C2F)C(F)=C1F	0.1	0.412663
34701	CoPID34701	O=C(C1=CC=C(OC2=CC=C(P(C3=CC=C(O)C=C3)(C4=CC=CC=C4)=O)C=C2)C(S(=O)(O)=O)=C1)C5=CC(S(=O)(O)=O)=CC=C5	OC1=C(F)C(F)=C(C2=C(F)C(F)=C(OC3=CC=C(C(C(F)(F)F)(C(F)(F)F)C4=CC=CC=C4)C=C3)C(F)=C2F)C(F)=C1F	0.2	0.412966
40651	CoPID40651	OC1=C(S(=O)(O)=O)C=C(C(C2=CC(S(=O)(O)=O)=C(OC3=CC=C(C=C3)C(C(F)(F)F)(C(F)(F)F)C4=CC=CC=C4)C=C2)=O)C=C1	OC1=C(F)C(F)=C(C2=C(F)C(F)=C(OC3=CC=C(C(C(F)(F)F)(C(F)(F)F)C4=CC=CC=C4)C=C3)C(F)=C2F)C(F)=C1F	0.2	0.414911
66551	CoPID66551	SC1=CC=C(SC2=CC=C(SC3=CC=C(P(C4=CC=CC(S(=O)(O)=O)=C4)(C5=CC=CC=C5)=O)C=C3)C=C2)C=C1	OC1=C(F)C(F)=C(C2=C(F)C(F)=C(OC3=CC=C(C(C(F)(F)F)(C(F)(F)F)C4=CC=CC=C4)C=C3)C(F)=C2F)C(F)=C1F	0.3	0.416598
13176	CoPID13176	O=P(C1=CC=C(OC2=CC=C(C(C(F)(F)F)(C(F)(F)F)C3=CC=C(O)C=C3)C=C2)C(S(=O)(O)=O)=C1)(C4=CC=CC(S(=O)(O)=O)=C4)C5=CC=CC=C5	OC1=C(F)C(F)=C(C2=C(F)C(F)=C(OC3=CC=C(C(C(F)(F)F)(C(F)(F)F)C4=CC=CC=C4)C=C3)C(F)=C2F)C(F)=C1F	0.1	0.41717
14751	CoPID14751	O=C(C1=CC(C2=C(OCCCS(=O)(O)=O)C=CC=C2)=C(OCCCS(=O)(O)=O)C=C1)C(C=C3)=CC=C3OC4=CC=C(C(O)=O)C=C4	OC1=C(F)C(F)=C(C2=C(F)C(F)=C(OC3=CC=C(C(C(F)(F)F)(C(F)(F)F)C4=CC=CC=C4)C=C3)C(F)=C2F)C(F)=C1F	0.1	0.417736
23501	CoPID23501	OC1=CC2=C(C=C(S(=O)(O)=O)C=C2OC3=CC=CC=C3C#N)C=C1	OC1=C(F)C(F)=C(C2=C(F)C(F)=C(OC3=CC=C(C(C(F)(F)F)(C(F)(F)F)C4=CC=CC=C4)C=C3)C(F)=C2F)C(F)=C1F	0.1	0.419476
13701	CoPID13701	OC1=CC(S(=O)(O)=O)=C(OC2=CC=C(S(=O)(C3=CC=CC=C3)=O)C=C2)C4=C1C(C5=C6C=CC=C5)C76C4C8=CC=CC=C87	OC1=C(F)C(F)=C(C2=C(F)C(F)=C(OC3=CC=C(C(C(F)(F)F)(C(F)(F)F)C4=CC=CC=C4)C=C3)C(F)=C2F)C(F)=C1F	0.1	0.420465
57451	CoPID57451	OC(C=C1)=CC=C1OC(C=C2)=CC=C2OC3=C(C(C4=CC=C(OCCCOC5=CC=C(S(=O)(O)=O)C=C5)C=C4)=O)C=CC=C3	OC1=C(F)C(F)=C(C2=C(F)C(F)=C(OC3=CC=C(C(C(F)(F)F)(C(F)(F)F)C4=CC=CC=C4)C=C3)C(F)=C2F)C(F)=C1F	0.2	0.421373
51601	CoPID51601	O=S(C1=CC2=C(C=C1)C=CC=C2C3=NC(C=C(SC=N4)C4=C5)=C5S3)(O)=O	O=C1C(C=CC=C2)=C2C(C(C=C3)=CC=C3OC(C=C4)=CC=C4C(N5)=NC(C5=C6)=CC=C6C7=CC(N=CN8)=C8C=C7)=NN1C9=CC=CC=C9	0.2	0.422476
20876	CoPID20876	OC1=CC=C(C(C(C=C2)=CC(S(=O)(O)=O)=C2OC(C=C3)=CC=C3C(CCC(O)=O)(C)C4=CC=CC=C4)=O)C=C1S(=O)(O)=O	OC1=C(F)C(F)=C(C2=C(F)C(F)=C(OC3=CC=C(C(C(F)(F)F)(C(F)(F)F)C4=CC=CC=C4)C=C3)C(F)=C2F)C(F)=C1F	0.1	0.422744
95458	CoPID95458	OC1=CC=C(OC2=CC=C(OC3=CC=C(OC4=CC=CC=C4C(C5=CC=C(CCCS(=O)(O)=O)C=C5)=O)C=C3)C=C2)C=C1	SC1=CC=C(SC2=CC=C(SC3=CC=C(S(C4=CC=CC=C4)(=O)=O)C=C3)C=C2)C=C1	0.4	0.42776
19651	CoPID19651	O=P(C1=CC=C(SC2=CC=C(C(C(F)(F)F)(C(F)(F)F)C3=CC=C(S)C=C3)C=C2)C=C1)(C4=CC=CC(S(=O)(O)=O)=C4)C5=CC=CC=C5	OC1=C(F)C(F)=C(C2=C(F)C(F)=C(OC3=CC=C(C(C(F)(F)F)(C(F)(F)F)C4=CC=CC=C4)C=C3)C(F)=C2F)C(F)=C1F	0.1	0.42876
9151	CoPID9151	O=C(C1=CC=C(C(C2=CC=C(OC3=CC=C(O)C(C(C)(C)C)=C3)C(S(=O)(O)=O)=C2)=O)C=C1)C4=CC(S(=O)(O)=O)=CC=C4	OC1=C(F)C(F)=C(C2=C(F)C(F)=C(OC3=CC=C(C(C(F)(F)F)(C(F)(F)F)C4=CC=CC=C4)C=C3)C(F)=C2F)C(F)=C1F	0.1	0.428795
13001	CoPID13001	O=C(C1=CC=C(OC2=CC=C(C(C3=CC=CC=C3C4=NC(C=CC=C5)=C5N4)C6=CC=C(O)C=C6)C=C2)C(S(=O)(O)=O)=C1)C7=CC(S(=O)(O)=O)=CC=C7	OC1=C(F)C(F)=C(C2=C(F)C(F)=C(OC3=CC=C(C(C(F)(F)F)(C(F)(F)F)C4=CC=CC=C4)C=C3)C(F)=C2F)C(F)=C1F	0.1	0.429597
3201	CoPID3201	O=C(C1=CC=C(OC2=CC=CC=C2)C=C1)C3=CC(C4=C(C=CC=C4)OCCCS(=O)(O)=O)=C(C=C3)OCCCS(=O)(O)=O	OC1=C(F)C(F)=C(C2=C(F)C(F)=C(OC3=CC=C(C(C(F)(F)F)(C(F)(F)F)C4=CC=CC=C4)C=C3)C(F)=C2F)C(F)=C1F	0.1	0.431155
52551	CoPID52551	OC1=CC2=C(C=C(S(=O)(O)=O)C=C2OC3=CC=CC=C3C#N)C=C1	OC1=C(F)C(F)=C(C2=C(F)C(F)=C(OC3=CC=C(C(C(F)(F)F)(C(F)(F)F)C4=CC=CC=C4)C=C3)C(F)=C2F)C(F)=C1F	0.2	0.431612
86464	CoPID86464	OC(C=C1)=CC=C1OC(C=C2)=CC=C2OC3=C(C(C4=CC=C(OCCCOC5=CC=C(S(=O)(O)=O)C=C5)C=C4)=O)C=CC=C3	O=S(C(C=C1)=CC=C1OC(C=C2)=CC=C2C3=CC=C(O)C=C3)(C4=CC=CC=C4)=O	0.3	0.433504
115544	CoPID115544	OC(C=C1)=CC=C1OC(C=C2)=CC=C2OC3=C(C(C4=CC=C(OCCCOC5=CC=C(S(=O)(O)=O)C=C5)C=C4)=O)C=CC=C3	O=S(C1=CC=CC=C1)(C2=CC=C(OC3=CC=C(C=CC(O)=C4)C4=C3)C=C2)=O	0.4	0.435079
14576	CoPID14576	OC(C(C1=CC=C(NC(C2=CC=C(NCCCCS(=O)(O)=O)C=C2)=O)C=C1)=C3)=CC=C3OC(C=C4)=CC=C4C(C5=CC=CC=C5)=O	OC1=C(F)C(F)=C(C2=C(F)C(F)=C(OC3=CC=C(C(C(F)(F)F)(C(F)(F)F)C4=CC=CC=C4)C=C3)C(F)=C2F)C(F)=C1F	0.1	0.435372
115546	CoPID115546	OC(C=C1)=CC=C1OC(C=C2)=CC=C2OC3=C(C(C4=CC=C(OCCCOC5=CC=C(S(=O)(O)=O)C=C5)C=C4)=O)C=CC=C3	OC1=CC=C(OC2=CC=C(OC3=CC=C(S(C4=CC=CC=C4)(=O)=O)C=C3)C=C2)C=C1	0.4	0.437102
22801	CoPID22801	O=C(C1=CC=CC(C(C2=CC=C(OC3=CC=C(C(C)(C)C4=CC=C(O)C=C4)C=C3)C(S(=O)(O)=O)=C2)=O)=C1)C5=CC(S(=O)(O)=O)=CC=C5	OC1=C(F)C(F)=C(C2=C(F)C(F)=C(OC3=CC=C(C(C(F)(F)F)(C(F)(F)F)C4=CC=CC=C4)C=C3)C(F)=C2F)C(F)=C1F	0.1	0.437304
66651	CoPID66651	SC1=CC=C(SC2=CC=C(SC3=CC=C(P(C4=CC=CC(S(=O)(O)=O)=C4)(C5=CC=CC=C5)=O)C=C3)C=C2)C=C1	O=C1C(C=CC=C2)=C2C(C(C=C3)=CC=C3OC(C=C4)=CC=C4C(N5)=NC(C5=C6)=CC=C6C7=CC(N=CN8)=C8C=C7)=NN1C9=CC=CC=C9	0.3	0.437442
64419	CoPID64419	OC1=CC=C(C2(C3=CC=CC=C3C4=CC=CC=C42)C5=CC=C(OC6=CC=C(P(C7=CC=CC=C7)(C8=CC=CC(S(=O)(O)=O)=C8)=O)C=C6)C=C5)C=C1	O=CC1=CC=C(OC2=CC=C(C3=NC4=C(C=C(C5=CC(N=CN6)=C6C=C5)C=C4)N3)C=C2)C=C1	0.3	0.437926
14926	CoPID14926	O=C(NC1=O)C2=C(C1=CC=C3)C3=C(C4=C(C=CC=C5C(N(C6=CC=C(OC7=CC(S(=O)(O)=O)=CC=C7)C=C6S(=O)(O)=O)C8=O)=O)C5=C8C=C4)C=C2	OC1=C(F)C(F)=C(C2=C(F)C(F)=C(OC3=CC=C(C(C(F)(F)F)(C(F)(F)F)C4=CC=CC=C4)C=C3)C(F)=C2F)C(F)=C1F	0.1	0.439732
5826	CoPID5826	OC(C=C1)=CC=C1P(C(C=C2)=CC=C2OC(C(S(=O)(O)=O)=C3)=CC=C3C(C4=CC=CC(C(C5=CC=CC(S(=O)(O)=O)=C5)=O)=C4)=O)(C6=CC=CC=C6)=O	OC1=C(F)C(F)=C(C2=C(F)C(F)=C(OC3=CC=C(C(C(F)(F)F)(C(F)(F)F)C4=CC=CC=C4)C=C3)C(F)=C2F)C(F)=C1F	0.1	0.441184
27351	CoPID27351	O=S(C1=CC=CC=C1/C=C/C(C=C2)=C(S(=O)(O)=O)C=C2C3N=NC(COC(C=C4)=CC=C4OCC5=CNN=N5)=N3)(O)=O	OC1=C(F)C(F)=C(C2=C(F)C(F)=C(OC3=CC=C(C(C(F)(F)F)(C(F)(F)F)C4=CC=CC=C4)C=C3)C(F)=C2F)C(F)=C1F	0.1	0.442175
6351	CoPID6351	OC1=CC=C(C2(C3=CC=CC=C3C4=CC=CC=C42)C5=CC=C(OC6=CC=C(P(C7=CC=CC=C7)(C8=CC=CC(S(=O)(O)=O)=C8)=O)C=C6)C=C5)C=C1	OC1=C(F)C(F)=C(C2=C(F)C(F)=C(OC3=CC=C(C(C(F)(F)F)(C(F)(F)F)C4=CC=CC=C4)C=C3)C(F)=C2F)C(F)=C1F	0.1	0.444976
66523	CoPID66523	SC1=CC=C(SC2=CC=C(SC3=CC=C(P(C4=CC=CC(S(=O)(O)=O)=C4)(C5=CC=CC=C5)=O)C=C3)C=C2)C=C1	O=P(C1=CC=C(OC2=CC=C(C3=NNC(C4=C3C=CC=C4)=O)C=C2)C=C1)(C5=CC=CC=C5)C6=CC=CC=C6	0.3	0.450891
115631	CoPID115631	OC(C=C1)=CC=C1OC(C=C2)=CC=C2OC3=C(C(C4=CC=C(OCCCOC5=CC=C(S(=O)(O)=O)C=C5)C=C4)=O)C=CC=C3	O=S(C1=CC=CC=C1)(C2=CC=C(OC3=CC=C(C=C(O)C=C4)C4=C3)C=C2)=O	0.4	0.451389
115610	CoPID115610	OC(C=C1)=CC=C1OC(C=C2)=CC=C2OC3=C(C(C4=CC=C(OCCCOC5=CC=C(S(=O)(O)=O)C=C5)C=C4)=O)C=CC=C3	O=S(C1=CC=CC=C1)(C2=CC=C(OC3=CC=C(O)C(C4=CC=CC=C4)=C3)C=C2)=O	0.4	0.451466
56576	CoPID56576	NC1=CC=C(S(=O)(O)=O)C(NC(C2=CC=C(OC3=CC=C(C=O)C=C3)C=C2)=O)=C1	OC1=C(F)C(F)=C(C2=C(F)C(F)=C(OC3=CC=C(C(C(F)(F)F)(C(F)(F)F)C4=CC=CC=C4)C=C3)C(F)=C2F)C(F)=C1F	0.2	0.451677
13351	CoPID13351	O=P(C1=CC=C(OC2=CC=C(C(C(F)(F)F)(C(F)(F)F)C3=CC=C(O)C=C3)C=C2)C(S(=O)(O)=O)=C1)(C4=CC=CC(S(=O)(O)=O)=C4)C5=CC=CC(S(=O)(O)=O)=C5	OC1=C(F)C(F)=C(C2=C(F)C(F)=C(OC3=CC=C(C(C(F)(F)F)(C(F)(F)F)C4=CC=CC=C4)C=C3)C(F)=C2F)C(F)=C1F	0.1	0.452987
42226	CoPID42226	O=P(C1=CC=C(OC2=CC=C(C(C(F)(F)F)(C(F)(F)F)C3=CC=C(O)C=C3)C=C2)C(S(=O)(O)=O)=C1)(C4=CC=CC(S(=O)(O)=O)=C4)C5=CC=CC=C5	OC1=C(F)C(F)=C(C2=C(F)C(F)=C(OC3=CC=C(C(C(F)(F)F)(C(F)(F)F)C4=CC=CC=C4)C=C3)C(F)=C2F)C(F)=C1F	0.2	0.453504
35051	CoPID35051	O=P(C1=CC=C(O)C=C1)(C2=CC=CC=C2)C(C=C3)=CC=C3OC(C(S(=O)(O)=O)=C4)=CC=C4S(C5=CC(S(=O)(O)=O)=CC=C5)(=O)=O	OC1=C(F)C(F)=C(C2=C(F)C(F)=C(OC3=CC=C(C(C(F)(F)F)(C(F)(F)F)C4=CC=CC=C4)C=C3)C(F)=C2F)C(F)=C1F	0.2	0.456248
7723	CoPID7723	O=S(C1=CC=CC(S(=O)(O)=O)=C1)(C2=CC=C(OC3=CC=C(C4(C5=C(C6=C4C=CC=C6)C=CC=C5)C7=CC=C(O)C=C7)C=C3)C(S(=O)(O)=O)=C2)=O	O=P(C1=CC=C(OC2=CC=C(C3=NNC(C4=C3C=CC=C4)=O)C=C2)C=C1)(C5=CC=CC=C5)C6=CC=CC=C6	0.1	0.456978
25923	CoPID25923	O=C(C1=CC=C(OC2=CC=C(C(C)(C)C3=CC=C(C(C)(C)C4=CC=C(O)C=C4)C=C3)C=C2)C(S(=O)(O)=O)=C1)C5=CC(S(=O)(O)=O)=CC=C5	O=P(C1=CC=C(OC2=CC=C(C3=NNC(C4=C3C=CC=C4)=O)C=C2)C=C1)(C5=CC=CC=C5)C6=CC=CC=C6	0.1	0.457201
26098	CoPID26098	O=C(C1=CC=C(OC2=CC=C(C(C)(C3=CC=CC(C(C)(C)C4=CC=C(O)C=C4)=C3)C)C=C2)C(S(=O)(O)=O)=C1)C5=CC(S(=O)(O)=O)=CC=C5	O=P(C1=CC=C(OC2=CC=C(C3=NNC(C4=C3C=CC=C4)=O)C=C2)C=C1)(C5=CC=CC=C5)C6=CC=CC=C6	0.1	0.457246
42723	CoPID42723	OC1=CC(S(=O)(O)=O)=C(OC2=CC=C(S(=O)(C3=CC=CC=C3)=O)C=C2)C4=C1C(C5=C6C=CC=C5)C76C4C8=CC=CC=C87	O=P(C1=CC=C(OC2=CC=C(C3=NNC(C4=C3C=CC=C4)=O)C=C2)C=C1)(C5=CC=CC=C5)C6=CC=CC=C6	0.2	0.457583
35373	CoPID35373	OC1=CC=C(C2(C3=CC=CC=C3C4=CC=CC=C42)C5=CC=C(OC6=CC=C(P(C7=CC=CC=C7)(C8=CC=CC(S(=O)(O)=O)=C8)=O)C=C6)C=C5)C=C1	O=P(C1=CC=C(OC2=CC=C(C3=NNC(C4=C3C=CC=C4)=O)C=C2)C=C1)(C5=CC=CC=C5)C6=CC=CC=C6	0.2	0.458557
10901	CoPID10901	O=C(C1=CC=C(C(C2=CC(S(=O)(O)=O)=CC=C2)=O)C=C1)C(C=C3S(=O)(O)=O)=CC=C3OC(C(C)=C4)=C(C)C=C4C5=CC(C)=C(O)C(C)=C5	OC1=C(F)C(F)=C(C2=C(F)C(F)=C(OC3=CC=C(C(C(F)(F)F)(C(F)(F)F)C4=CC=CC=C4)C=C3)C(F)=C2F)C(F)=C1F	0.1	0.459441
37473	CoPID37473	SC1=CC=C(SC2=CC=C(SC3=CC=C(P(C4=CC=CC(S(=O)(O)=O)=C4)(C5=CC=CC=C5)=O)C=C3)C=C2)C=C1	O=P(C1=CC=C(OC2=CC=C(C3=NNC(C4=C3C=CC=C4)=O)C=C2)C=C1)(C5=CC=CC=C5)C6=CC=CC=C6	0.2	0.459712
144594	CoPID144594	OC(C=C1)=CC=C1OC(C=C2)=CC=C2OC3=C(C(C4=CC=C(OCCCOC5=CC=C(S(=O)(O)=O)C=C5)C=C4)=O)C=CC=C3	O=S(C1=CC=CC=C1)(C2=CC=C(OC3=CC=C(C=CC(O)=C4)C4=C3)C=C2)=O	0.5	0.460245
55148	CoPID55148	O=C(C1=CC=C(OC2=CC=C(C(C)(C3=CC=CC(C(C)(C)C4=CC=C(O)C=C4)=C3)C)C=C2)C(S(=O)(O)=O)=C1)C5=CC(S(=O)(O)=O)=CC=C5	O=P(C1=CC=C(OC2=CC=C(C3=NNC(C4=C3C=CC=C4)=O)C=C2)C=C1)(C5=CC=CC=C5)C6=CC=CC=C6	0.2	0.460525
54973	CoPID54973	O=C(C1=CC=C(OC2=CC=C(C(C)(C)C3=CC=C(C(C)(C)C4=CC=C(O)C=C4)C=C3)C=C2)C(S(=O)(O)=O)=C1)C5=CC(S(=O)(O)=O)=CC=C5	O=P(C1=CC=C(OC2=CC=C(C3=NNC(C4=C3C=CC=C4)=O)C=C2)C=C1)(C5=CC=CC=C5)C6=CC=CC=C6	0.2	0.460632
57446	CoPID57446	OC(C=C1)=CC=C1OC(C=C2)=CC=C2OC3=C(C(C4=CC=C(OCCCOC5=CC=C(S(=O)(O)=O)C=C5)C=C4)=O)C=CC=C3	OC1=CC=C(OC2=CC=C(OC3=CC=C(S(C4=CC=CC=C4)(=O)=O)C=C3)C=C2)C=C1	0.2	0.461167
44601	CoPID44601	O=C(C1=CC=C(OC2=CC=C(S(=O)(O)=O)C=C2)C=C1)C3=CC=CC=C3	O=C1C(C=CC=C2)=C2C(C(C=C3)=CC=C3OC(C=C4)=CC=C4C(N5)=NC(C5=C6)=CC=C6C7=CC(N=CN8)=C8C=C7)=NN1C9=CC=CC=C9	0.2	0.463051
18001	CoPID18001	O=S(C1=CC=CC(S(=O)(O)=O)=C1)(C2=CC=C(OC3=CC=C(O)C=C3)C(S(=O)(O)=O)=C2)=O	O=C1C(C=CC=C2)=C2C(C(C=C3)=CC=C3OC(C=C4)=CC=C4C(N5)=NC(C5=C6)=CC=C6C7=CC(N=CN8)=C8C=C7)=NN1C9=CC=CC=C9	0.1	0.463125
1801	CoPID1801	CC(CCC(N1C=CN=N1)=O)(C2=CC=C(O)C=C2)C(C=C3)=CC=C3OC(C(S(=O)(O)=O)=C4)=CC=C4C(C5=CC=CC(S(=O)(O)=O)=C5)=O	OC1=C(F)C(F)=C(C2=C(F)C(F)=C(OC3=CC=C(C(C(F)(F)F)(C(F)(F)F)C4=CC=CC=C4)C=C3)C(F)=C2F)C(F)=C1F	0.1	0.464332
11526	CoPID11526	C=C(C1=CC(S(=O)(O)=O)=CC=C1)C2=CC=CC=C2	O=C1C(C=CC=C2)=C2C(C(C=C3)=CC=C3OC(C=C4)=CC=C4C(N5)=NC(C5=C6)=CC=C6C7=CC(N=CN8)=C8C=C7)=NN1C9=CC=CC=C9	0.1	0.464381
26576	CoPID26576	NC1=CC(NC(C2=CC(C=O)=CC=C2)=O)=CC=C1S(=O)(O)=O	O=C1C(C=CC=C2)=C2C(C(C=C3)=CC=C3OC(C=C4)=CC=C4C(N5)=NC(C5=C6)=CC=C6C7=CC(N=CN8)=C8C=C7)=NN1C9=CC=CC=C9	0.1	0.465162
37601	CoPID37601	SC1=CC=C(SC2=CC=C(SC3=CC=C(P(C4=CC=CC(S(=O)(O)=O)=C4)(C5=CC=CC=C5)=O)C=C3)C=C2)C=C1	O=C1C(C=CC=C2)=C2C(C(C=C3)=CC=C3OC(C=C4)=CC=C4C(N5)=NC(C5=C6)=CC=C6C7=CC(N=CN8)=C8C=C7)=NN1C9=CC=CC=C9	0.2	0.465871
73551	CoPID73551	O=C(C1=CC=C(OC2=CC=C(S(=O)(O)=O)C=C2)C=C1)C3=CC=CC=C3	OC1=C(F)C(F)=C(C2=C(F)C(F)=C(OC3=CC=C(C(C(F)(F)F)(C(F)(F)F)C4=CC=CC=C4)C=C3)C(F)=C2F)C(F)=C1F	0.3	0.465941
52826	CoPID52826	OC1=CC(C=C(S(=O)(O)=O)C=C2)=C2C=C1OC3=CC=CC=C3C#N	O=C1C(C=CC=C2)=C2C(C(C=C3)=CC=C3OC(C=C4)=CC=C4C(N5)=NC(C5=C6)=CC=C6C7=CC(N=CN8)=C8C=C7)=NN1C9=CC=CC=C9	0.2	0.466499
81426	CoPID81426	OC1=C(OC2=CC=C(C(C3=CC(C(C4=CC=CC=C4)=O)=CC=C3)=O)C=C2)C=C5C(C=CC(S(=O)(O)=O)=C5)=C1	OC1=C(F)C(F)=C(C2=C(F)C(F)=C(OC3=CC=C(C(C(F)(F)F)(C(F)(F)F)C4=CC=CC=C4)C=C3)C(F)=C2F)C(F)=C1F	0.3	0.466503
95506	CoPID95506	OC1=CC=C(OC2=CC=C(OC3=CC=C(OC4=CC=CC=C4C(C5=CC=C(CCCS(=O)(O)=O)C=C5)=O)C=C3)C=C2)C=C1	O=S(C1=CC=CC=C1)(C2=CC=C(OC3=CC=C(C=C(O)C=C4)C4=C3)C=C2)=O	0.4	0.466589
75301	CoPID75301	OC1=CC=CC(OC2=CC=C(C=CC=C3)C3=C2)=C1C(C4=C(S(=O)(O)=O)C=CC=C4)=O	OC1=C(F)C(F)=C(C2=C(F)C(F)=C(OC3=CC=C(C(C(F)(F)F)(C(F)(F)F)C4=CC=CC=C4)C=C3)C(F)=C2F)C(F)=C1F	0.3	0.466738
95485	CoPID95485	OC1=CC=C(OC2=CC=C(OC3=CC=C(OC4=CC=CC=C4C(C5=CC=C(CCCS(=O)(O)=O)C=C5)=O)C=C3)C=C2)C=C1	O=S(C1=CC=CC=C1)(C2=CC=C(OC3=CC=C(O)C(C4=CC=CC=C4)=C3)C=C2)=O	0.4	0.467781
95389	CoPID95389	OC1=CC=C(OC2=CC=C(OC3=CC=C(OC4=CC=CC=C4C(C5=CC=C(CCCS(=O)(O)=O)C=C5)=O)C=C3)C=C2)C=C1	O=S(C(C=C1)=CC=C1OC(C=C2)=CC=C2C3=CC=C(O)C=C3)(C4=CC=CC=C4)=O	0.4	0.468258
8726	CoPID8726	O=C(C1=CC(S(=O)(O)=O)=CC=C1)C2=CC=CC=C2	O=C1C(C=CC=C2)=C2C(C(C=C3)=CC=C3OC(C=C4)=CC=C4C(N5)=NC(C5=C6)=CC=C6C7=CC(N=CN8)=C8C=C7)=NN1C9=CC=CC=C9	0.1	0.468874
56676	CoPID56676	NC1=CC=C(S(=O)(O)=O)C(NC(C2=CC=C(OC3=CC=C(C=O)C=C3)C=C2)=O)=C1	O=C1C(C=CC=C2)=C2C(C(C=C3)=CC=C3OC(C=C4)=CC=C4C(N5)=NC(C5=C6)=CC=C6C7=CC(N=CN8)=C8C=C7)=NN1C9=CC=CC=C9	0.2	0.469205
40751	CoPID40751	OC1=C(S(=O)(O)=O)C=C(C(C2=CC(S(=O)(O)=O)=C(OC3=CC=C(C=C3)C(C(F)(F)F)(C(F)(F)F)C4=CC=CC=C4)C=C2)=O)C=C1	O=C1C(C=CC=C2)=C2C(C(C=C3)=CC=C3OC(C=C4)=CC=C4C(N5)=NC(C5=C6)=CC=C6C7=CC(N=CN8)=C8C=C7)=NN1C9=CC=CC=C9	0.2	0.470669
25951	CoPID25951	O=C(C1=CC=C(OC2=CC=C(C(C)(C)C3=CC=C(C(C)(C)C4=CC=C(O)C=C4)C=C3)C=C2)C(S(=O)(O)=O)=C1)C5=CC(S(=O)(O)=O)=CC=C5	OC1=C(F)C(F)=C(C2=C(F)C(F)=C(OC3=CC=C(C(C(F)(F)F)(C(F)(F)F)C4=CC=CC=C4)C=C3)C(F)=C2F)C(F)=C1F	0.1	0.470881
124469	CoPID124469	OC1=CC=C(OC2=CC=C(OC3=CC=C(OC4=CC=CC=C4C(C5=CC=C(CCCS(=O)(O)=O)C=C5)=O)C=C3)C=C2)C=C1	O=S(C1=CC=CC=C1)(C2=CC=C(OC3=CC=C(C=CC(O)=C4)C4=C3)C=C2)=O	0.5	0.471039
50055	CoPID50055	OC1=CC=C(S(C2=C(OC3=CC=C(C(C4=CC(S(=O)(O)=O)=CC=C4)=O)C=C3S(=O)(O)=O)C=C(OC5=CC=CC=C5)C=C2)(=O)=O)C=C1	O=P(C1=CC=C(SC2=CC=C(SC3=CC=C(S)C=C3)C=C2)C=C1)(C4=CC=CC=C4)C5=CC=CC=C5	0.2	0.471298
723	CoPID723	O=P(C1=CC=CC(S(=O)(O)=O)=C1)(C2=CC(OS(O)=O)=CC=C2)C3=CC=C(C(S(=O)(O)=O)=C3)SC4=CC=C(C=C4)SC5=CC=C(C=C5)S	O=P(C1=CC=C(OC2=CC=C(C3=NNC(C4=C3C=CC=C4)=O)C=C2)C=C1)(C5=CC=CC=C5)C6=CC=CC=C6	0.1	0.473173
48701	CoPID48701	O=P(C1=CC=C(SC2=CC=C(C(C(F)(F)F)(C(F)(F)F)C3=CC=C(S)C=C3)C=C2)C=C1)(C4=CC=CC(S(=O)(O)=O)=C4)C5=CC=CC=C5	OC1=C(F)C(F)=C(C2=C(F)C(F)=C(OC3=CC=C(C(C(F)(F)F)(C(F)(F)F)C4=CC=CC=C4)C=C3)C(F)=C2F)C(F)=C1F	0.2	0.474524
66348	CoPID66348	OC1=CC=C(OC2=CC=C(OC3=CC=C(OC4=CC=CC=C4C(C5=CC=C(CCCS(=O)(O)=O)C=C5)=O)C=C3)C=C2)C=C1	O=P(C1=CC=C(OC2=CC=C(C3=NNC(C4=C3C=CC=C4)=O)C=C2)C=C1)(C5=CC=CC=C5)C6=CC=CC=C6	0.3	0.474662
26126	CoPID26126	O=C(C1=CC=C(OC2=CC=C(C(C)(C3=CC=CC(C(C)(C)C4=CC=C(O)C=C4)=C3)C)C=C2)C(S(=O)(O)=O)=C1)C5=CC(S(=O)(O)=O)=CC=C5	OC1=C(F)C(F)=C(C2=C(F)C(F)=C(OC3=CC=C(C(C(F)(F)F)(C(F)(F)F)C4=CC=CC=C4)C=C3)C(F)=C2F)C(F)=C1F	0.1	0.47486
28326	CoPID28326	OC1=CC(S(=O)(O)=O)=C(OC2=CC=CC=C2C#N)C=C1	O=C1C(C=CC=C2)=C2C(C(C=C3)=CC=C3OC(C=C4)=CC=C4C(N5)=NC(C5=C6)=CC=C6C7=CC(N=CN8)=C8C=C7)=NN1C9=CC=CC=C9	0.1	0.475122
66330	CoPID66330	OC1=CC=C(OC2=CC=C(OC3=CC=C(OC4=CC=CC=C4C(C5=CC=C(CCCS(=O)(O)=O)C=C5)=O)C=C3)C=C2)C=C1	O=P(C1=CC=C(SC2=CC=C(SC3=CC=C(S)C=C3)C=C2)C=C1)(C4=CC=CC=C4)C5=CC=CC=C5	0.3	0.475474
4776	CoPID4776	OC1=CC=C(C2(C3=CC=CC=C3CN2CCOCCCS(=O)(O)=O)C4=CC=C(OC5=CC=C(S(C6=CC=CC=C6)(=O)=O)C=C5)C=C4)C=C1	OC1=C(F)C(F)=C(C2=C(F)C(F)=C(OC3=CC=C(C(C(F)(F)F)(C(F)(F)F)C4=CC=CC=C4)C=C3)C(F)=C2F)C(F)=C1F	0.1	0.476322
33798	CoPID33798	OC1=CC=C(C2(C3=CC=CC=C3CN2CCOCCCS(=O)(O)=O)C4=CC=C(OC5=CC=C(S(C6=CC=CC=C6)(=O)=O)C=C5)C=C4)C=C1	O=P(C1=CC=C(OC2=CC=C(C3=NNC(C4=C3C=CC=C4)=O)C=C2)C=C1)(C5=CC=CC=C5)C6=CC=CC=C6	0.2	0.476478
144681	CoPID144681	OC(C=C1)=CC=C1OC(C=C2)=CC=C2OC3=C(C(C4=CC=C(OCCCOC5=CC=C(S(=O)(O)=O)C=C5)C=C4)=O)C=CC=C3	O=S(C1=CC=CC=C1)(C2=CC=C(OC3=CC=C(C=C(O)C=C4)C4=C3)C=C2)=O	0.5	0.477193
86473	CoPID86473	OC(C=C1)=CC=C1OC(C=C2)=CC=C2OC3=C(C(C4=CC=C(OCCCOC5=CC=C(S(=O)(O)=O)C=C5)C=C4)=O)C=CC=C3	O=P(C1=CC=C(OC2=CC=C(C3=NNC(C4=C3C=CC=C4)=O)C=C2)C=C1)(C5=CC=CC=C5)C6=CC=CC=C6	0.3	0.477198
95380	CoPID95380	OC1=CC=C(OC2=CC=C(OC3=CC=C(OC4=CC=CC=C4C(C5=CC=C(CCCS(=O)(O)=O)C=C5)=O)C=C3)C=C2)C=C1	O=P(C1=CC=C(SC2=CC=C(SC3=CC=C(S)C=C3)C=C2)C=C1)(C4=CC=CC=C4)C5=CC=CC=C5	0.4	0.477997
25573	CoPID25573	O=S(C1=CC(S(=O)(O)=O)=CC=C1)(C2=CC=C(OC3=CC=C(C4(NC(C5=C4C=CC=C5)=O)C6=CC=C(O)C=C6)C=C3)C(S(=O)(O)=O)=C2)=O	O=P(C1=CC=C(OC2=CC=C(C3=NNC(C4=C3C=CC=C4)=O)C=C2)C=C1)(C5=CC=CC=C5)C6=CC=CC=C6	0.1	0.480932
32951	CoPID32951	O=P(C1=CC=CC(S(=O)(O)=O)=C1)(C2=CC=CC=C2)C3=CC=C(C(S(=O)(O)=O)=C3)OC4=CC=C(C=C4)C5=NNC(C6=C5C=CC=C6)=O	OC1=C(F)C(F)=C(C2=C(F)C(F)=C(OC3=CC=C(C(C(F)(F)F)(C(F)(F)F)C4=CC=CC=C4)C=C3)C(F)=C2F)C(F)=C1F	0.2	0.481981
125139	CoPID125139	OC1=CC=C(OC2=CC=C(OC3=C(C(C4=CC=C(OC5=CC=C(S(=O)(O)=O)C=C5)C=C4)=O)C=CC=C3)C=C2)C=C1	O=S(C(C=C1)=CC=C1OC(C=C2)=CC=C2C3=CC=C(O)C=C3)(C4=CC=CC=C4)=O	0.5	0.482117
95573	CoPID95573	SC1=CC=C(SC2=CC=C(SC3=CC=C(P(C4=CC=CC(S(=O)(O)=O)=C4)(C5=CC=CC=C5)=O)C=C3)C=C2)C=C1	O=P(C1=CC=C(OC2=CC=C(C3=NNC(C4=C3C=CC=C4)=O)C=C2)C=C1)(C5=CC=CC=C5)C6=CC=CC=C6	0.4	0.483385
77723	CoPID77723	O=P(C1=CC=C(SC2=CC=C(C(C(F)(F)F)(C(F)(F)F)C3=CC=C(S)C=C3)C=C2)C=C1)(C4=CC=CC(S(=O)(O)=O)=C4)C5=CC=CC=C5	O=P(C1=CC=C(OC2=CC=C(C3=NNC(C4=C3C=CC=C4)=O)C=C2)C=C1)(C5=CC=CC=C5)C6=CC=CC=C6	0.3	0.483669
64276	CoPID64276	OC1=C(OC2=CC=C(C(C3=CC(C(C4=CC=CC=C4)=O)=CC=C3)=O)C=C2)C=C5C(C=C(S(=O)(O)=O)C=C5)=C1	OC1=C(F)C(F)=C(C2=C(F)C(F)=C(OC3=CC=C(C(C(F)(F)F)(C(F)(F)F)C4=CC=CC=C4)C=C3)C(F)=C2F)C(F)=C1F	0.3	0.484993
124556	CoPID124556	OC1=CC=C(OC2=CC=C(OC3=CC=C(OC4=CC=CC=C4C(C5=CC=C(CCCS(=O)(O)=O)C=C5)=O)C=C3)C=C2)C=C1	O=S(C1=CC=CC=C1)(C2=CC=C(OC3=CC=C(C=C(O)C=C4)C4=C3)C=C2)=O	0.5	0.485558
34655	CoPID34655	O=C(C1=CC=C(OC2=CC=C(P(C3=CC=C(O)C=C3)(C4=CC=CC=C4)=O)C=C2)C(S(=O)(O)=O)=C1)C5=CC(S(=O)(O)=O)=CC=C5	O=P(C1=CC=C(SC2=CC=C(SC3=CC=C(S)C=C3)C=C2)C=C1)(C4=CC=CC=C4)C5=CC=CC=C5	0.2	0.485965
154189	CoPID154189	OC1=CC=C(OC2=CC=C(OC3=C(C(C4=CC=C(OC5=CC=C(S(=O)(O)=O)C=C5)C=C4)=O)C=CC=C3)C=C2)C=C1	O=S(C(C=C1)=CC=C1OC(C=C2)=CC=C2C3=CC=C(O)C=C3)(C4=CC=CC=C4)=O	0.6	0.486806
23123	CoPID23123	OC1=CC=C(C(C)(C)C2=CC=C(OCC3=CN(C4=CC=C(/C=C/C5=C(S(=O)(O)=O)C=C(N6N=NC=C6)C=C5)C(S(=O)(O)=O)=C4)N=N3)C=C2)C=C1	O=P(C1=CC=C(OC2=CC=C(C3=NNC(C4=C3C=CC=C4)=O)C=C2)C=C1)(C5=CC=CC=C5)C6=CC=CC=C6	0.1	0.486886
38476	CoPID38476	OC1=C(F)C(F)=C(C2=C(F)C(F)=C(OC3=CC(S(=O)(O)=O)=CC4=C3C=CC=C4)C(F)=C2F)C(F)=C1F	O=C1C(C=CC=C2)=C2C(C(C=C3)=CC=C3OC(C=C4)=CC=C4C(N5)=NC(C5=C6)=CC=C6C7=CC(N=CN8)=C8C=C7)=NN1C9=CC=CC=C9	0.2	0.487677
48673	CoPID48673	O=P(C1=CC=C(SC2=CC=C(C(C(F)(F)F)(C(F)(F)F)C3=CC=C(S)C=C3)C=C2)C=C1)(C4=CC=CC(S(=O)(O)=O)=C4)C5=CC=CC=C5	O=P(C1=CC=C(OC2=CC=C(C3=NNC(C4=C3C=CC=C4)=O)C=C2)C=C1)(C5=CC=CC=C5)C6=CC=CC=C6	0.2	0.487772
5973	CoPID5973	O=P(C1=CC=C(O)C=C1)(C2=CC=CC=C2)C(C=C3)=CC=C3OC(C(S(=O)(O)=O)=C4)=CC=C4S(C5=CC(S(=O)(O)=O)=CC=C5)(=O)=O	O=P(C1=CC=C(OC2=CC=C(C3=NNC(C4=C3C=CC=C4)=O)C=C2)C=C1)(C5=CC=CC=C5)C6=CC=CC=C6	0.1	0.488532
124508	CoPID124508	OC1=CC=C(OC2=CC=C(OC3=CC=C(OC4=CC=CC=C4C(C5=CC=C(CCCS(=O)(O)=O)C=C5)=O)C=C3)C=C2)C=C1	SC1=CC=C(SC2=CC=C(SC3=CC=C(S(C4=CC=CC=C4)(=O)=O)C=C3)C=C2)C=C1	0.5	0.488628
144564	CoPID144564	OC(C=C1)=CC=C1OC(C=C2)=CC=C2OC3=C(C(C4=CC=C(OCCCOC5=CC=C(S(=O)(O)=O)C=C5)C=C4)=O)C=CC=C3	O=S(C(C=C1)=CC=C1OC(C=C2)=CC=C2C3=CC=C(O)C=C3)(C4=CC=CC=C4)=O	0.5	0.489427
64423	CoPID64423	OC1=CC=C(C2(C3=CC=CC=C3C4=CC=CC=C42)C5=CC=C(OC6=CC=C(P(C7=CC=CC=C7)(C8=CC=CC(S(=O)(O)=O)=C8)=O)C=C6)C=C5)C=C1	O=P(C1=CC=C(OC2=CC=C(C3=NNC(C4=C3C=CC=C4)=O)C=C2)C=C1)(C5=CC=CC=C5)C6=CC=CC=C6	0.3	0.489905
66376	CoPID66376	OC1=CC=C(OC2=CC=C(OC3=CC=C(OC4=CC=CC=C4C(C5=CC=C(CCCS(=O)(O)=O)C=C5)=O)C=C3)C=C2)C=C1	OC1=C(F)C(F)=C(C2=C(F)C(F)=C(OC3=CC=C(C(C(F)(F)F)(C(F)(F)F)C4=CC=CC=C4)C=C3)C(F)=C2F)C(F)=C1F	0.3	0.49035
37298	CoPID37298	OC1=CC=C(OC2=CC=C(OC3=CC=C(OC4=CC=CC=C4C(C5=CC=C(CCCS(=O)(O)=O)C=C5)=O)C=C3)C=C2)C=C1	O=P(C1=CC=C(OC2=CC=C(C3=NNC(C4=C3C=CC=C4)=O)C=C2)C=C1)(C5=CC=CC=C5)C6=CC=CC=C6	0.2	0.4908
25776	CoPID25776	O=C(C1=C2C=CC=C1)N(CCCS(=O)(O)=O)C2(C3=CC=C(O)C=C3)C(C=C4)=CC=C4OC5=CC=C(S(C6=CC=CC(S(=O)(O)=O)=C6)(=O)=O)C=C5S(=O)(O)=O	OC1=C(F)C(F)=C(C2=C(F)C(F)=C(OC3=CC=C(C(C(F)(F)F)(C(F)(F)F)C4=CC=CC=C4)C=C3)C(F)=C2F)C(F)=C1F	0.1	0.491618
77751	CoPID77751	O=P(C1=CC=C(SC2=CC=C(C(C(F)(F)F)(C(F)(F)F)C3=CC=C(S)C=C3)C=C2)C=C1)(C4=CC=CC(S(=O)(O)=O)=C4)C5=CC=CC=C5	OC1=C(F)C(F)=C(C2=C(F)C(F)=C(OC3=CC=C(C(C(F)(F)F)(C(F)(F)F)C4=CC=CC=C4)C=C3)C(F)=C2F)C(F)=C1F	0.3	0.491772
326	CoPID326	O=S(C1=CC=CC(S(=O)(O)=O)=C1)(C2=CC=C(OC3=CC=C(C4=CC=CC=C4)C=C3)C(S(=O)(O)=O)=C2)=O	O=C1C(C=CC=C2)=C2C(C(C=C3)=CC=C3OC(C=C4)=CC=C4C(N5)=NC(C5=C6)=CC=C6C7=CC(N=CN8)=C8C=C7)=NN1C9=CC=CC=C9	0.1	0.492437
144660	CoPID144660	OC(C=C1)=CC=C1OC(C=C2)=CC=C2OC3=C(C(C4=CC=C(OCCCOC5=CC=C(S(=O)(O)=O)C=C5)C=C4)=O)C=CC=C3	O=S(C1=CC=CC=C1)(C2=CC=C(OC3=CC=C(O)C(C4=CC=CC=C4)=C3)C=C2)=O	0.5	0.493009
66542	CoPID66542	SC1=CC=C(SC2=CC=C(SC3=CC=C(P(C4=CC=CC(S(=O)(O)=O)=C4)(C5=CC=CC=C5)=O)C=C3)C=C2)C=C1	O=S(C1=CC=CC=C1)(C2=CC=C(C=C2)OC3=CC=C(C=C3)C(C4=CC=CC=C4)(C5=CC=CC=C5)C6=CC=C(C=C6)O)=O	0.3	0.493056
42751	CoPID42751	OC1=CC(S(=O)(O)=O)=C(OC2=CC=C(S(=O)(C3=CC=CC=C3)=O)C=C2)C4=C1C(C5=C6C=CC=C5)C76C4C8=CC=CC=C87	OC1=C(F)C(F)=C(C2=C(F)C(F)=C(OC3=CC=C(C(C(F)(F)F)(C(F)(F)F)C4=CC=CC=C4)C=C3)C(F)=C2F)C(F)=C1F	0.2	0.493652
52651	CoPID52651	OC1=CC2=C(C=C(S(=O)(O)=O)C=C2OC3=CC=CC=C3C#N)C=C1	O=C1C(C=CC=C2)=C2C(C(C=C3)=CC=C3OC(C=C4)=CC=C4C(N5)=NC(C5=C6)=CC=C6C7=CC(N=CN8)=C8C=C7)=NN1C9=CC=CC=C9	0.2	0.49373
47476	CoPID47476	O=C(C1=CC(S(=O)(O)=O)=CC(C=O)=C1)NC(C=C2)=CC=C2OC3=C(C#N)C(OC4=CC=C(N)C=C4)=CC=C3	OC1=C(F)C(F)=C(C2=C(F)C(F)=C(OC3=CC=C(C(C(F)(F)F)(C(F)(F)F)C4=CC=CC=C4)C=C3)C(F)=C2F)C(F)=C1F	0.2	0.493989
95601	CoPID95601	SC1=CC=C(SC2=CC=C(SC3=CC=C(P(C4=CC=CC(S(=O)(O)=O)=C4)(C5=CC=CC=C5)=O)C=C3)C=C2)C=C1	OC1=C(F)C(F)=C(C2=C(F)C(F)=C(OC3=CC=C(C(C(F)(F)F)(C(F)(F)F)C4=CC=CC=C4)C=C3)C(F)=C2F)C(F)=C1F	0.4	0.49444
95419	CoPID95419	OC1=CC=C(OC2=CC=C(OC3=CC=C(OC4=CC=CC=C4C(C5=CC=C(CCCS(=O)(O)=O)C=C5)=O)C=C3)C=C2)C=C1	O=S(C1=CC=CC=C1)(C2=CC=C(OC3=CC=C(C=CC(O)=C4)C4=C3)C=C2)=O	0.4	0.494597
10348	CoPID10348	CC(C1=CC=C(OCC2=CN(C3=CC=C(/C=C/C4=C(S(=O)(O)=O)C=CC=C4)C(S(=O)(O)=O)=C3)N=N2)C=C1)(C)C(C=C5)=CC=C5OCC6=CNN=N6	O=P(C1=CC=C(OC2=CC=C(C3=NNC(C4=C3C=CC=C4)=O)C=C2)C=C1)(C5=CC=CC=C5)C6=CC=CC=C6	0.1	0.494958
13673	CoPID13673	OC1=CC(S(=O)(O)=O)=C(OC2=CC=C(S(=O)(C3=CC=CC=C3)=O)C=C2)C4=C1C(C5=C6C=CC=C5)C76C4C8=CC=CC=C87	O=P(C1=CC=C(OC2=CC=C(C3=NNC(C4=C3C=CC=C4)=O)C=C2)C=C1)(C5=CC=CC=C5)C6=CC=CC=C6	0.1	0.495588
21023	CoPID21023	OC1=CC=C(S(C2=C(OC3=CC=C(C(C4=CC(S(=O)(O)=O)=CC=C4)=O)C=C3S(=O)(O)=O)C=C(OC5=CC=CC=C5)C=C2)(=O)=O)C=C1	O=P(C1=CC=C(OC2=CC=C(C3=NNC(C4=C3C=CC=C4)=O)C=C2)C=C1)(C5=CC=CC=C5)C6=CC=CC=C6	0.1	0.496274
41830	CoPID41830	O=C(C1=CC=C(OC2=CC=C(C(C3=CC=CC=C3C(O)=O)C4=CC=C(O)C=C4)C=C2)C(S(=O)(O)=O)=C1)C5=CC(S(=O)(O)=O)=CC=C5	O=P(C1=CC=C(SC2=CC=C(SC3=CC=C(S)C=C3)C=C2)C=C1)(C4=CC=CC=C4)C5=CC=CC=C5	0.2	0.499625
10873	CoPID10873	O=C(C1=CC=C(C(C2=CC(S(=O)(O)=O)=CC=C2)=O)C=C1)C(C=C3S(=O)(O)=O)=CC=C3OC(C(C)=C4)=C(C)C=C4C5=CC(C)=C(O)C(C)=C5	O=P(C1=CC=C(OC2=CC=C(C3=NNC(C4=C3C=CC=C4)=O)C=C2)C=C1)(C5=CC=CC=C5)C6=CC=CC=C6	0.1	0.499863

## Sheet: TM
	CoPID	hydrophilic	hydrophobic	ratioLic	TMRFPre
51769	CoPID51769	O=C(C1=CC=C(OC2=CC=C(C(C(F)(F)F)(C(F)(F)F)C3=CC=C(O)C=C3)C=C2)C(S(=O)(O)=O)=C1)C4=CC(S(=O)(O)=O)=CC=C4	OC(C=C1)=CC=C1C(C(F)(F)F)(C(F)(F)F)C(C=C2)=CC=C2OC3=NC4=CC(C(C(F)(F)F)(C(F)(F)F)C5=CC6=C(C=C5)OC(C7=CC=CC=C7)=N6)=CC=C4O3	0.2	2.58112
51730	CoPID51730	O=C(C1=CC=C(OC2=CC=C(C(C(F)(F)F)(C(F)(F)F)C3=CC=C(O)C=C3)C=C2)C(S(=O)(O)=O)=C1)C4=CC(S(=O)(O)=O)=CC=C4	OC(C=C1)=CC=C1C(C(F)(F)F)(C(F)(F)F)C(C=C2)=CC=C2OC(C=C3)=CC=C3C4=NC5=CC(C(C6=CC(N=C(C7=CC=CC=C7)O8)=C8C=C6)(C(F)(F)F)C(F)(F)F)=CC=C5O4	0.2	2.55508
22719	CoPID22719	O=C(C1=CC=C(OC2=CC=C(C(C(F)(F)F)(C(F)(F)F)C3=CC=C(O)C=C3)C=C2)C(S(=O)(O)=O)=C1)C4=CC(S(=O)(O)=O)=CC=C4	OC(C=C1)=CC=C1C(C(F)(F)F)(C(F)(F)F)C(C=C2)=CC=C2OC3=NC4=CC(C(C(F)(F)F)(C(F)(F)F)C5=CC6=C(C=C5)OC(C7=CC=CC=C7)=N6)=CC=C4O3	0.1	2.53188
40744	CoPID40744	OC1=C(S(=O)(O)=O)C=C(C(C2=CC(S(=O)(O)=O)=C(OC3=CC=C(C=C3)C(C(F)(F)F)(C(F)(F)F)C4=CC=CC=C4)C=C2)=O)C=C1	OC(C=C1)=CC=C1C(C(F)(F)F)(C(F)(F)F)C(C=C2)=CC=C2OC3=NC4=CC(C(C(F)(F)F)(C(F)(F)F)C5=CC6=C(C=C5)OC(C7=CC=CC=C7)=N6)=CC=C4O3	0.2	2.49152
7844	CoPID7844	O=S(C1=CC=CC(S(=O)(O)=O)=C1)(C2=CC=C(OC3=CC=C(C4(C5=C(C6=C4C=CC=C6)C=CC=C5)C7=CC=C(O)C=C7)C=C3)C(S(=O)(O)=O)=C2)=O	OC(C=C1)=CC=C1C(C(F)(F)F)(C(F)(F)F)C(C=C2)=CC=C2OC3=NC4=CC(C(C(F)(F)F)(C(F)(F)F)C5=CC6=C(C=C5)OC(C7=CC=CC=C7)=N6)=CC=C4O3	0.1	2.4804
4519	CoPID4519	CC(C)(C1=CC=C(O)C=C1)C(C=C2)=CC=C2OC(C(S(=O)(O)=O)=C3)=CC=C3S(C4=CC(S(=O)(O)=O)=CC=C4)(=O)=O	OC(C=C1)=CC=C1C(C(F)(F)F)(C(F)(F)F)C(C=C2)=CC=C2OC3=NC4=CC(C(C(F)(F)F)(C(F)(F)F)C5=CC6=C(C=C5)OC(C7=CC=CC=C7)=N6)=CC=C4O3	0.1	2.47989
16594	CoPID16594	O=S(C1=CC=CC(S(=O)(O)=O)=C1)(C2=CC=C(OC3=CC=C(C(C(F)(F)F)(C(F)(F)F)C4=CC=C(O)C=C4)C=C3)C(S(=O)(O)=O)=C2)=O	OC(C=C1)=CC=C1C(C(F)(F)F)(C(F)(F)F)C(C=C2)=CC=C2OC3=NC4=CC(C(C(F)(F)F)(C(F)(F)F)C5=CC6=C(C=C5)OC(C7=CC=CC=C7)=N6)=CC=C4O3	0.1	2.47944
7669	CoPID7669	O=S(C1=CC=CC(S(=O)(O)=O)=C1)(C2=CC=C(OC3=CC=C(C(C4=CC=C(O)C=C4)(C5=CC=CC=C5)C6=CC=CC=C6)C=C3)C(S(=O)(O)=O)=C2)=O	OC(C=C1)=CC=C1C(C(F)(F)F)(C(F)(F)F)C(C=C2)=CC=C2OC3=NC4=CC(C(C(F)(F)F)(C(F)(F)F)C5=CC6=C(C=C5)OC(C7=CC=CC=C7)=N6)=CC=C4O3	0.1	2.47916
22894	CoPID22894	O=C(C1=CC=CC(C(C2=CC=C(OC3=CC=C(C(C)(C)C4=CC=C(O)C=C4)C=C3)C(S(=O)(O)=O)=C2)=O)=C1)C5=CC(S(=O)(O)=O)=CC=C5	OC(C=C1)=CC=C1C(C(F)(F)F)(C(F)(F)F)C(C=C2)=CC=C2OC3=NC4=CC(C(C(F)(F)F)(C(F)(F)F)C5=CC6=C(C=C5)OC(C7=CC=CC=C7)=N6)=CC=C4O3	0.1	2.47762
22680	CoPID22680	O=C(C1=CC=C(OC2=CC=C(C(C(F)(F)F)(C(F)(F)F)C3=CC=C(O)C=C3)C=C2)C(S(=O)(O)=O)=C1)C4=CC(S(=O)(O)=O)=CC=C4	OC(C=C1)=CC=C1C(C(F)(F)F)(C(F)(F)F)C(C=C2)=CC=C2OC(C=C3)=CC=C3C4=NC5=CC(C(C6=CC(N=C(C7=CC=CC=C7)O8)=C8C=C6)(C(F)(F)F)C(F)(F)F)=CC=C5O4	0.1	2.47513
13094	CoPID13094	O=C(C1=CC=C(OC2=CC=C(C(C3=CC=CC=C3C4=NC(C=CC=C5)=C5N4)C6=CC=C(O)C=C6)C=C2)C(S(=O)(O)=O)=C1)C7=CC(S(=O)(O)=O)=CC=C7	OC(C=C1)=CC=C1C(C(F)(F)F)(C(F)(F)F)C(C=C2)=CC=C2OC3=NC4=CC(C(C(F)(F)F)(C(F)(F)F)C5=CC6=C(C=C5)OC(C7=CC=CC=C7)=N6)=CC=C4O3	0.1	2.47508
22019	CoPID22019	O=S(C1=CC=C(O)C(S(=O)(O)=O)=C1)(C2=CC(S(=O)(O)=O)=C(OC3=CC=C(C(C(F)(F)F)(C(F)(F)F)C4=CC=C(O)C=C4)C=C3)C=C2)=O	OC(C=C1)=CC=C1C(C(F)(F)F)(C(F)(F)F)C(C=C2)=CC=C2OC3=NC4=CC(C(C(F)(F)F)(C(F)(F)F)C5=CC6=C(C=C5)OC(C7=CC=CC=C7)=N6)=CC=C4O3	0.1	2.4744
26044	CoPID26044	O=C(C1=CC=C(OC2=CC=C(C(C)(C)C3=CC=C(C(C)(C)C4=CC=C(O)C=C4)C=C3)C=C2)C(S(=O)(O)=O)=C1)C5=CC(S(=O)(O)=O)=CC=C5	OC(C=C1)=CC=C1C(C(F)(F)F)(C(F)(F)F)C(C=C2)=CC=C2OC3=NC4=CC(C(C(F)(F)F)(C(F)(F)F)C5=CC6=C(C=C5)OC(C7=CC=CC=C7)=N6)=CC=C4O3	0.1	2.47375
41969	CoPID41969	O=C(C1=CC=C(OC2=CC=C(C(C3=CC=CC=C3C(O)=O)C4=CC=C(O)C=C4)C=C2)C(S(=O)(O)=O)=C1)C5=CC(S(=O)(O)=O)=CC=C5	OC(C=C1)=CC=C1C(C(F)(F)F)(C(F)(F)F)C(C=C2)=CC=C2OC3=NC4=CC(C(C(F)(F)F)(C(F)(F)F)C5=CC6=C(C=C5)OC(C7=CC=CC=C7)=N6)=CC=C4O3	0.2	2.47128
55094	CoPID55094	O=C(C1=CC=C(OC2=CC=C(C(C)(C)C3=CC=C(C(C)(C)C4=CC=C(O)C=C4)C=C3)C=C2)C(S(=O)(O)=O)=C1)C5=CC(S(=O)(O)=O)=CC=C5	OC(C=C1)=CC=C1C(C(F)(F)F)(C(F)(F)F)C(C=C2)=CC=C2OC3=NC4=CC(C(C(F)(F)F)(C(F)(F)F)C5=CC6=C(C=C5)OC(C7=CC=CC=C7)=N6)=CC=C4O3	0.2	2.47022
25694	CoPID25694	O=S(C1=CC(S(=O)(O)=O)=CC=C1)(C2=CC=C(OC3=CC=C(C4(NC(C5=C4C=CC=C5)=O)C6=CC=C(O)C=C6)C=C3)C(S(=O)(O)=O)=C2)=O	OC(C=C1)=CC=C1C(C(F)(F)F)(C(F)(F)F)C(C=C2)=CC=C2OC3=NC4=CC(C(C(F)(F)F)(C(F)(F)F)C5=CC6=C(C=C5)OC(C7=CC=CC=C7)=N6)=CC=C4O3	0.1	2.46893
12919	CoPID12919	O=C(C1=CC=C(OC2=CC=C(C(C3=CC=CC=C3C(O)=O)C4=CC=C(O)C=C4)C=C2)C(S(=O)(O)=O)=C1)C5=CC(S(=O)(O)=O)=CC=C5	OC(C=C1)=CC=C1C(C(F)(F)F)(C(F)(F)F)C(C=C2)=CC=C2OC3=NC4=CC(C(C(F)(F)F)(C(F)(F)F)C5=CC6=C(C=C5)OC(C7=CC=CC=C7)=N6)=CC=C4O3	0.1	2.4675
1894	CoPID1894	CC(CCC(N1C=CN=N1)=O)(C2=CC=C(O)C=C2)C(C=C3)=CC=C3OC(C(S(=O)(O)=O)=C4)=CC=C4C(C5=CC=CC(S(=O)(O)=O)=C5)=O	OC(C=C1)=CC=C1C(C(F)(F)F)(C(F)(F)F)C(C=C2)=CC=C2OC3=NC4=CC(C(C(F)(F)F)(C(F)(F)F)C5=CC6=C(C=C5)OC(C7=CC=CC=C7)=N6)=CC=C4O3	0.1	2.4668
30944	CoPID30944	CC(CCC(N1C=CN=N1)=O)(C2=CC=C(O)C=C2)C(C=C3)=CC=C3OC(C(S(=O)(O)=O)=C4)=CC=C4C(C5=CC=CC(S(=O)(O)=O)=C5)=O	OC(C=C1)=CC=C1C(C(F)(F)F)(C(F)(F)F)C(C=C2)=CC=C2OC3=NC4=CC(C(C(F)(F)F)(C(F)(F)F)C5=CC6=C(C=C5)OC(C7=CC=CC=C7)=N6)=CC=C4O3	0.2	2.46236
40705	CoPID40705	OC1=C(S(=O)(O)=O)C=C(C(C2=CC(S(=O)(O)=O)=C(OC3=CC=C(C=C3)C(C(F)(F)F)(C(F)(F)F)C4=CC=CC=C4)C=C2)=O)C=C1	OC(C=C1)=CC=C1C(C(F)(F)F)(C(F)(F)F)C(C=C2)=CC=C2OC(C=C3)=CC=C3C4=NC5=CC(C(C6=CC(N=C(C7=CC=CC=C7)O8)=C8C=C6)(C(F)(F)F)C(F)(F)F)=CC=C5O4	0.2	2.45637
11694	CoPID11694	OC1=C(S(=O)(O)=O)C=C(C(C2=CC(S(=O)(O)=O)=C(OC3=CC=C(C=C3)C(C(F)(F)F)(C(F)(F)F)C4=CC=CC=C4)C=C2)=O)C=C1	OC(C=C1)=CC=C1C(C(F)(F)F)(C(F)(F)F)C(C=C2)=CC=C2OC3=NC4=CC(C(C(F)(F)F)(C(F)(F)F)C5=CC6=C(C=C5)OC(C7=CC=CC=C7)=N6)=CC=C4O3	0.1	2.45627
17294	CoPID17294	OC1=CC=CC(OC2=CC=C(C=CC=C3)C3=C2)=C1C(C4=C(S(=O)(O)=O)C=CC=C4)=O	OC(C=C1)=CC=C1C(C(F)(F)F)(C(F)(F)F)C(C=C2)=CC=C2OC3=NC4=CC(C(C(F)(F)F)(C(F)(F)F)C5=CC6=C(C=C5)OC(C7=CC=CC=C7)=N6)=CC=C4O3	0.1	2.45611
46344	CoPID46344	OC1=CC=CC(OC2=CC=C(C=CC=C3)C3=C2)=C1C(C4=C(S(=O)(O)=O)C=CC=C4)=O	OC(C=C1)=CC=C1C(C(F)(F)F)(C(F)(F)F)C(C=C2)=CC=C2OC3=NC4=CC(C(C(F)(F)F)(C(F)(F)F)C5=CC6=C(C=C5)OC(C7=CC=CC=C7)=N6)=CC=C4O3	0.2	2.4559
3819	CoPID3819	O=S(C1=CC(S(=O)(O)=O)=CC=C1)(C2=CC=C(OC3=CC=C(C(C4=CC=C(O)C=C4)(N5C6=CC=CC=C6)C7=C(C5=O)C=CC=C7)C=C3)C(S(=O)(O)=O)=C2)=O	OC(C=C1)=CC=C1C(C(F)(F)F)(C(F)(F)F)C(C=C2)=CC=C2OC3=NC4=CC(C(C(F)(F)F)(C(F)(F)F)C5=CC6=C(C=C5)OC(C7=CC=CC=C7)=N6)=CC=C4O3	0.1	2.45525
51944	CoPID51944	O=C(C1=CC=CC(C(C2=CC=C(OC3=CC=C(C(C)(C)C4=CC=C(O)C=C4)C=C3)C(S(=O)(O)=O)=C2)=O)=C1)C5=CC(S(=O)(O)=O)=CC=C5	OC(C=C1)=CC=C1C(C(F)(F)F)(C(F)(F)F)C(C=C2)=CC=C2OC3=NC4=CC(C(C(F)(F)F)(C(F)(F)F)C5=CC6=C(C=C5)OC(C7=CC=CC=C7)=N6)=CC=C4O3	0.2	2.45419
1194	CoPID1194	O=C(C1=CC=C(OC2=CC=C(C(CCCC(NCCC(C3=CC=C(S(=O)(O)=O)C=C3)C4=CC=C(S(=O)(O)=O)C=C4)=O)(C)C5=CC=C(O)C=C5)C=C2)C=C1)C6=CC=C(F)C=C6	OC(C=C1)=CC=C1C(C(F)(F)F)(C(F)(F)F)C(C=C2)=CC=C2OC3=NC4=CC(C(C(F)(F)F)(C(F)(F)F)C5=CC6=C(C=C5)OC(C7=CC=CC=C7)=N6)=CC=C4O3	0.1	2.45038
109869	CoPID109869	O=C(C1=CC=C(OC2=CC=C(C(C(F)(F)F)(C(F)(F)F)C3=CC=C(O)C=C3)C=C2)C(S(=O)(O)=O)=C1)C4=CC(S(=O)(O)=O)=CC=C4	OC(C=C1)=CC=C1C(C(F)(F)F)(C(F)(F)F)C(C=C2)=CC=C2OC3=NC4=CC(C(C(F)(F)F)(C(F)(F)F)C5=CC6=C(C=C5)OC(C7=CC=CC=C7)=N6)=CC=C4O3	0.4	2.45
14319	CoPID14319	O=C(C1=CC=C(OC2=CC(C3=CC(OC)=C(S(=O)(O)=O)C=C3)=C(O)C=C2)C=C1)C4=CC=CC=C4	OC(C=C1)=CC=C1C(C(F)(F)F)(C(F)(F)F)C(C=C2)=CC=C2OC3=NC4=CC(C(C(F)(F)F)(C(F)(F)F)C5=CC6=C(C=C5)OC(C7=CC=CC=C7)=N6)=CC=C4O3	0.1	2.4473
25869	CoPID25869	O=C(C1=C2C=CC=C1)N(CCCS(=O)(O)=O)C2(C3=CC=C(O)C=C3)C(C=C4)=CC=C4OC5=CC=C(S(C6=CC=CC(S(=O)(O)=O)=C6)(=O)=O)C=C5S(=O)(O)=O	OC(C=C1)=CC=C1C(C(F)(F)F)(C(F)(F)F)C(C=C2)=CC=C2OC3=NC4=CC(C(C(F)(F)F)(C(F)(F)F)C5=CC6=C(C=C5)OC(C7=CC=CC=C7)=N6)=CC=C4O3	0.1	2.44288
138919	CoPID138919	O=C(C1=CC=C(OC2=CC=C(C(C(F)(F)F)(C(F)(F)F)C3=CC=C(O)C=C3)C=C2)C(S(=O)(O)=O)=C1)C4=CC(S(=O)(O)=O)=CC=C4	OC(C=C1)=CC=C1C(C(F)(F)F)(C(F)(F)F)C(C=C2)=CC=C2OC3=NC4=CC(C(C(F)(F)F)(C(F)(F)F)C5=CC6=C(C=C5)OC(C7=CC=CC=C7)=N6)=CC=C4O3	0.5	2.44157
12744	CoPID12744	O=S(C1=CC=CC=C1)(C2=CC=C(OC3=CC(C4=CC=CC(OC5=CC=C(C(C6=CC=C(C(C7=CC(S(=O)(O)=O)=C(F)C=C7)=O)C=C6)=O)C=C5S(=O)(O)=O)=C4)=C(O)C=C3)C=C2)=O	OC(C=C1)=CC=C1C(C(F)(F)F)(C(F)(F)F)C(C=C2)=CC=C2OC3=NC4=CC(C(C(F)(F)F)(C(F)(F)F)C5=CC6=C(C=C5)OC(C7=CC=CC=C7)=N6)=CC=C4O3	0.1	2.44059
15894	CoPID15894	O=C(C1=CC=C(OC2=CC=C(C(C3=C(F)C(F)=C(OC4=CC=C(C=C4)C5(C6=CC=C(O)C=C6)C7=CC(S(=O)(O)=O)=CC=C7C8=C5C=C(S(=O)(O)=O)C=C8)C(F)=C3F)=O)C=C2)C=C1)C9=C(F)C(F)=CC(F)=C9F	OC(C=C1)=CC=C1C(C(F)(F)F)(C(F)(F)F)C(C=C2)=CC=C2OC3=NC4=CC(C(C(F)(F)F)(C(F)(F)F)C5=CC6=C(C=C5)OC(C7=CC=CC=C7)=N6)=CC=C4O3	0.1	2.44017
109830	CoPID109830	O=C(C1=CC=C(OC2=CC=C(C(C(F)(F)F)(C(F)(F)F)C3=CC=C(O)C=C3)C=C2)C(S(=O)(O)=O)=C1)C4=CC(S(=O)(O)=O)=CC=C4	OC(C=C1)=CC=C1C(C(F)(F)F)(C(F)(F)F)C(C=C2)=CC=C2OC(C=C3)=CC=C3C4=NC5=CC(C(C6=CC(N=C(C7=CC=CC=C7)O8)=C8C=C6)(C(F)(F)F)C(F)(F)F)=CC=C5O4	0.4	2.43861
10819	CoPID10819	O=C(C1=CC(S(=O)(O)=O)=CC=C1)C(C=C2S(=O)(O)=O)=CC=C2OC(C(C)=C3)=C(C)C=C3C4=CC(C)=C(O)C(C)=C4	OC(C=C1)=CC=C1C(C(F)(F)F)(C(F)(F)F)C(C=C2)=CC=C2OC3=NC4=CC(C(C(F)(F)F)(C(F)(F)F)C5=CC6=C(C=C5)OC(C7=CC=CC=C7)=N6)=CC=C4O3	0.1	2.43563
23244	CoPID23244	OC1=CC=C(C(C)(C)C2=CC=C(OCC3=CN(C4=CC=C(/C=C/C5=C(S(=O)(O)=O)C=C(N6N=NC=C6)C=C5)C(S(=O)(O)=O)=C4)N=N3)C=C2)C=C1	OC(C=C1)=CC=C1C(C(F)(F)F)(C(F)(F)F)C(C=C2)=CC=C2OC3=NC4=CC(C(C(F)(F)F)(C(F)(F)F)C5=CC6=C(C=C5)OC(C7=CC=CC=C7)=N6)=CC=C4O3	0.1	2.43483
21144	CoPID21144	OC1=CC=C(S(C2=C(OC3=CC=C(C(C4=CC(S(=O)(O)=O)=CC=C4)=O)C=C3S(=O)(O)=O)C=C(OC5=CC=CC=C5)C=C2)(=O)=O)C=C1	OC(C=C1)=CC=C1C(C(F)(F)F)(C(F)(F)F)C(C=C2)=CC=C2OC3=NC4=CC(C(C(F)(F)F)(C(F)(F)F)C5=CC6=C(C=C5)OC(C7=CC=CC=C7)=N6)=CC=C4O3	0.1	2.43337
45644	CoPID45644	O=S(C1=CC=CC(S(=O)(O)=O)=C1)(C2=CC=C(OC3=CC=C(C(C(F)(F)F)(C(F)(F)F)C4=CC=C(O)C=C4)C=C3)C(S(=O)(O)=O)=C2)=O	OC(C=C1)=CC=C1C(C(F)(F)F)(C(F)(F)F)C(C=C2)=CC=C2OC3=NC4=CC(C(C(F)(F)F)(C(F)(F)F)C5=CC6=C(C=C5)OC(C7=CC=CC=C7)=N6)=CC=C4O3	0.2	2.43168
12569	CoPID12569	O=S(C1=CC=CC=C1)(C2=CC=C(OC3=CC(C4=CC=CC(OC5=CC=C(C(C6=CC(S(=O)(O)=O)=C(F)C=C6)=O)C=C5S(=O)(O)=O)=C4)=C(O)C=C3)C=C2)=O	OC(C=C1)=CC=C1C(C(F)(F)F)(C(F)(F)F)C(C=C2)=CC=C2OC3=NC4=CC(C(C(F)(F)F)(C(F)(F)F)C5=CC6=C(C=C5)OC(C7=CC=CC=C7)=N6)=CC=C4O3	0.1	2.4247
2419	CoPID2419	O=S(C1=CC(S(=O)(O)=O)=C(OC2=CC=C(C3=CC=C(C=C3)O)C=C2)C=C1)(C4=CC=CC(S(=O)(O)=O)=C4)=O	OC(C=C1)=CC=C1C(C(F)(F)F)(C(F)(F)F)C(C=C2)=CC=C2OC3=NC4=CC(C(C(F)(F)F)(C(F)(F)F)C5=CC6=C(C=C5)OC(C7=CC=CC=C7)=N6)=CC=C4O3	0.1	2.42368
138880	CoPID138880	O=C(C1=CC=C(OC2=CC=C(C(C(F)(F)F)(C(F)(F)F)C3=CC=C(O)C=C3)C=C2)C(S(=O)(O)=O)=C1)C4=CC(S(=O)(O)=O)=CC=C4	OC(C=C1)=CC=C1C(C(F)(F)F)(C(F)(F)F)C(C=C2)=CC=C2OC(C=C3)=CC=C3C4=NC5=CC(C(C6=CC(N=C(C7=CC=CC=C7)O8)=C8C=C6)(C(F)(F)F)C(F)(F)F)=CC=C5O4	0.5	2.42341
51069	CoPID51069	O=S(C1=CC=C(O)C(S(=O)(O)=O)=C1)(C2=CC(S(=O)(O)=O)=C(OC3=CC=C(C(C(F)(F)F)(C(F)(F)F)C4=CC=C(O)C=C4)C=C3)C=C2)=O	OC(C=C1)=CC=C1C(C(F)(F)F)(C(F)(F)F)C(C=C2)=CC=C2OC3=NC4=CC(C(C(F)(F)F)(C(F)(F)F)C5=CC6=C(C=C5)OC(C7=CC=CC=C7)=N6)=CC=C4O3	0.2	2.42201
39869	CoPID39869	O=C(C1=CC(S(=O)(O)=O)=CC=C1)C(C=C2S(=O)(O)=O)=CC=C2OC(C(C)=C3)=C(C)C=C3C4=CC(C)=C(O)C(C)=C4	OC(C=C1)=CC=C1C(C(F)(F)F)(C(F)(F)F)C(C=C2)=CC=C2OC3=NC4=CC(C(C(F)(F)F)(C(F)(F)F)C5=CC6=C(C=C5)OC(C7=CC=CC=C7)=N6)=CC=C4O3	0.2	2.42008
13269	CoPID13269	O=P(C1=CC=C(OC2=CC=C(C(C(F)(F)F)(C(F)(F)F)C3=CC=C(O)C=C3)C=C2)C(S(=O)(O)=O)=C1)(C4=CC=CC(S(=O)(O)=O)=C4)C5=CC=CC=C5	OC(C=C1)=CC=C1C(C(F)(F)F)(C(F)(F)F)C(C=C2)=CC=C2OC3=NC4=CC(C(C(F)(F)F)(C(F)(F)F)C5=CC6=C(C=C5)OC(C7=CC=CC=C7)=N6)=CC=C4O3	0.1	2.41905
20969	CoPID20969	OC1=CC=C(C(C(C=C2)=CC(S(=O)(O)=O)=C2OC(C=C3)=CC=C3C(CCC(O)=O)(C)C4=CC=CC=C4)=O)C=C1S(=O)(O)=O	OC(C=C1)=CC=C1C(C(F)(F)F)(C(F)(F)F)C(C=C2)=CC=C2OC3=NC4=CC(C(C(F)(F)F)(C(F)(F)F)C5=CC6=C(C=C5)OC(C7=CC=CC=C7)=N6)=CC=C4O3	0.1	2.41883
36894	CoPID36894	O=S(C1=CC=CC(S(=O)(O)=O)=C1)(C2=CC=C(OC3=CC=C(C4(C5=C(C6=C4C=CC=C6)C=CC=C5)C7=CC=C(O)C=C7)C=C3)C(S(=O)(O)=O)=C2)=O	OC(C=C1)=CC=C1C(C(F)(F)F)(C(F)(F)F)C(C=C2)=CC=C2OC3=NC4=CC(C(C(F)(F)F)(C(F)(F)F)C5=CC6=C(C=C5)OC(C7=CC=CC=C7)=N6)=CC=C4O3	0.2	2.41392
33569	CoPID33569	CC(C)(C1=CC=C(O)C=C1)C(C=C2)=CC=C2OC(C(S(=O)(O)=O)=C3)=CC=C3S(C4=CC(S(=O)(O)=O)=CC=C4)(=O)=O	OC(C=C1)=CC=C1C(C(F)(F)F)(C(F)(F)F)C(C=C2)=CC=C2OC3=NC4=CC(C(C(F)(F)F)(C(F)(F)F)C5=CC6=C(C=C5)OC(C7=CC=CC=C7)=N6)=CC=C4O3	0.2	2.41311
36719	CoPID36719	O=S(C1=CC=CC(S(=O)(O)=O)=C1)(C2=CC=C(OC3=CC=C(C(C4=CC=C(O)C=C4)(C5=CC=CC=C5)C6=CC=CC=C6)C=C3)C(S(=O)(O)=O)=C2)=O	OC(C=C1)=CC=C1C(C(F)(F)F)(C(F)(F)F)C(C=C2)=CC=C2OC3=NC4=CC(C(C(F)(F)F)(C(F)(F)F)C5=CC6=C(C=C5)OC(C7=CC=CC=C7)=N6)=CC=C4O3	0.2	2.41186
17994	CoPID17994	O=S(C1=CC=CC(S(=O)(O)=O)=C1)(C2=CC=C(OC3=CC=C(O)C=C3)C(S(=O)(O)=O)=C2)=O	OC(C=C1)=CC=C1C(C(F)(F)F)(C(F)(F)F)C(C=C2)=CC=C2OC3=NC4=CC(C(C(F)(F)F)(C(F)(F)F)C5=CC6=C(C=C5)OC(C7=CC=CC=C7)=N6)=CC=C4O3	0.1	2.41029

## Sheet: four_index
	hydrophilic	hydrophobic	ratioLic	sigmaRFPre	Td5RFPre	MePermRFPre	TMRFPre	selectivity
921	O=C(C1=CC=C(OC2=CC(C3=CC(OC)=C(S(=O)(O)=O)C=C3)=C(O)C=C2)C=C1)C4=CC=CC=C4	SC(C=C1)=CC=C1SC(C=C2)=CC=C2SC3=C(C#N)C=CC=C3	0.7	18.1514	331.812	2.78131	1.2833	6.5262
869	O=C(C1=CC=C(OC2=CC(C3=CC(OC)=C(S(=O)(O)=O)C=C3)=C(O)C=C2)C=C1)C4=CC=CC=C4	O=CC1=CC=C(OC2=CC=C(C3=NC4=C(C=C(C5=CC(N=CN6)=C6C=C5)C=C4)N3)C=C2)C=C1	0.7	18.2957	266.316	2.90302	1.3663	6.30231
920	O=C(C1=CC=C(OC2=CC(C3=CC(OC)=C(S(=O)(O)=O)C=C3)=C(O)C=C2)C=C1)C4=CC=CC=C4	SC1=CC(C=C2)=C(C=C1)C=C2SC3=C(C#N)C=CC=C3	0.7	18.0324	327.028	2.91463	1.25616	6.18683
925	O=C(C1=CC=C(OC2=CC(C3=CC(OC)=C(S(=O)(O)=O)C=C3)=C(O)C=C2)C=C1)C4=CC=CC=C4	N#CC1=C(C2=CC=C(OC3=CC=CC=C3)C=C2)C=CC=C1	0.7	19.1554	310.641	3.09727	1.52217	6.18461
882	O=C(C1=CC=C(OC2=CC(C3=CC(OC)=C(S(=O)(O)=O)C=C3)=C(O)C=C2)C=C1)C4=CC=CC=C4	O=C(C1=CC=C(OC2=CC=C(C(C)(C)C3=CC=C(O)C=C3)C=C2)C=C1)C4=CC=CC=C4	0.7	22.0392	324.847	3.65281	1.5222	6.03349
915	O=C(C1=CC=C(OC2=CC(C3=CC(OC)=C(S(=O)(O)=O)C=C3)=C(O)C=C2)C=C1)C4=CC=CC=C4	N=P(OC1=CC=C(F)C=C1)OC2=CC=C(OC)C=C2	0.7	18.8845	306.444	3.16251	1.54214	5.97137
566	OC1=CC=CC(OC2=CC=C(C=CC=C3)C3=C2)=C1C(C4=C(S(=O)(O)=O)C=CC=C4)=O	N=P(OC1=CC=C(F)C=C1)OC2=CC=C(OC)C=C2	0.6	19.1397	304.692	3.21158	1.22044	5.9596
495	O=C(C1=CC=C(OC2=CC(C3=CC(OC)=C(S(=O)(O)=O)C=C3)=C(O)C=C2)C=C1)C4=CC=CC=C4	O=C(C1=CC=C(OC2=CC=C(C(C)(C)C3=CC=C(O)C=C3)C=C2)C=C1)C4=CC=CC=C4	0.6	18.0637	336.616	3.04952	1.58512	5.92346
871	O=C(C1=CC=C(OC2=CC(C3=CC(OC)=C(S(=O)(O)=O)C=C3)=C(O)C=C2)C=C1)C4=CC=CC=C4	O=S(C1=CC=C(O)C=C1)(C2=CC=C(OC3=CC=C(C(C4=CC=CC=C4)=O)C=C3)C=C2)=O	0.7	20.9898	321.873	3.66074	1.46692	5.73375
867	O=C(C1=CC=C(OC2=CC(C3=CC(OC)=C(S(=O)(O)=O)C=C3)=C(O)C=C2)C=C1)C4=CC=CC=C4	O=C(C1=CC=C(C=C1)F)C2=CC=C(C=C2)OC3=CC=C(C=C3)C(C)(C4=CC=C(C=C4)O)C	0.7	20.7332	323.838	3.61803	1.58598	5.73054
97	SC(C=C1)=CC=C1SC(C=C2)=CC=C2SC(C(S(=O)(O)=O)=C3)=CC=C3S(C4=CC(S(=O)(O)=O)=CC=C4)(=O)=O	SC1=CC(C=C2)=C(C=C1)C=C2SC3=C(C#N)C=CC=C3	0.4	17.8864	322.749	3.12905	1.17573	5.71625
571	OC1=CC=CC(OC2=CC=C(C=CC=C3)C3=C2)=C1C(C4=C(S(=O)(O)=O)C=CC=C4)=O	N#CC1=C(C2=CC=C(OC3=CC=CC=C3)C=C2)C=CC=C1	0.6	18.8942	304.035	3.33453	1.06002	5.66622
545	OC1=CC=CC(OC2=CC=C(C=CC=C3)C3=C2)=C1C(C4=C(S(=O)(O)=O)C=CC=C4)=O	O=P(C1=CC=C(OC2=CC=C(O)C=C2)C=C1)(C3=CC=CC=C3)C4=CC=CC=C4	0.6	18.6038	333.586	3.3056	1.07469	5.62796
888	O=C(C1=CC=C(OC2=CC(C3=CC(OC)=C(S(=O)(O)=O)C=C3)=C(O)C=C2)C=C1)C4=CC=CC=C4	O=P(C1=CC=C(OC2=CC=C(O)C=C2)C=C1)(C3=CC=CC=C3)C4=CC=CC=C4	0.7	19.8241	327.331	3.55011	1.41719	5.58408
878	O=C(C1=CC=C(OC2=CC(C3=CC(OC)=C(S(=O)(O)=O)C=C3)=C(O)C=C2)C=C1)C4=CC=CC=C4	CCC1=CC=C(OCCCC)C=C1	0.7	18.1541	316.741	3.25662	1.34293	5.57454
552	OC1=CC=CC(OC2=CC=C(C=CC=C3)C3=C2)=C1C(C4=C(S(=O)(O)=O)C=CC=C4)=O	O=C(C1=CC=CC(C=O)=C1)NC(C=C2)=CC=C2OC3=C(C#N)C(OC4=CC=C(N)C=C4)=CC=C3	0.6	19.8225	266.26	3.59316	1.28155	5.51674
542	OC1=CC=CC(OC2=CC=C(C=CC=C3)C3=C2)=C1C(C4=C(S(=O)(O)=O)C=CC=C4)=O	O=C(NC1=O)C2=CC=C3C4=C2C1=CC=C4C(N(C5=CC=C(OC6=CC=CC=C6)C=C5)C3=O)=O	0.6	18.0651	299.991	3.29795	1.06734	5.47769
540	OC1=CC=CC(OC2=CC=C(C=CC=C3)C3=C2)=C1C(C4=C(S(=O)(O)=O)C=CC=C4)=O	O=C(C1=CC(C2=C(OC)C=CC=C2)=C(OC)C=C1)C(C=C3)=CC=C3OC4=CC=C(C(O)=O)C=C4	0.6	20.5626	308.193	3.75425	1.34727	5.47715
1598	O=C(C1=CC=C(OC2=CC(C3=CC(OC)=C(S(=O)(O)=O)C=C3)=C(O)C=C2)C=C1)C4=CC=CC=C4	SC(C=C1)=CC=C1SC(C=C2)=CC=C2SC3=C(C#N)C=CC=C3	0.8	19.4827	331.366	3.6228	1.42452	5.37778
1597	O=C(C1=CC=C(OC2=CC(C3=CC(OC)=C(S(=O)(O)=O)C=C3)=C(O)C=C2)C=C1)C4=CC=CC=C4	SC1=CC(C=C2)=C(C=C1)C=C2SC3=C(C#N)C=CC=C3	0.8	20.199	319.254	3.80162	1.40506	5.31326
868	O=C(C1=CC=C(OC2=CC(C3=CC(OC)=C(S(=O)(O)=O)C=C3)=C(O)C=C2)C=C1)C4=CC=CC=C4	O=S(C(C=C1)=CC=C1OC(C=C2)=CC=C2C3=CC=C(O)C=C3)(C4=CC=CC=C4)=O	0.7	19.2373	329.333	3.63831	1.58266	5.28743
903	O=C(C1=CC=C(OC2=CC(C3=CC(OC)=C(S(=O)(O)=O)C=C3)=C(O)C=C2)C=C1)C4=CC=CC=C4	OC1=CC=C(S(C2=CC=C(OC3=CC=C(C4=CC=CC=C4)C=C3)C=C2)(=O)=O)C=C1	0.7	19.9704	324.539	3.77725	1.58311	5.28702
550	OC1=CC=CC(OC2=CC=C(C=CC=C3)C3=C2)=C1C(C4=C(S(=O)(O)=O)C=CC=C4)=O	OC(C=C1)=CC=C1C(C=C2)=CC=C2OC3=C(C#N)C=CC=C3	0.6	19.1033	310.742	3.61346	1.25701	5.2867
875	O=C(C1=CC=C(OC2=CC(C3=CC(OC)=C(S(=O)(O)=O)C=C3)=C(O)C=C2)C=C1)C4=CC=CC=C4	CC(C)(C1=CC=C(OC2=CC=C(S(C3=CC=CC=C3)(=O)=O)C=C2)C=C1)C4=CC=C(O)C=C4	0.7	19.5982	324.55	3.70947	1.64222	5.2833
902	O=C(C1=CC=C(OC2=CC(C3=CC(OC)=C(S(=O)(O)=O)C=C3)=C(O)C=C2)C=C1)C4=CC=CC=C4	OC1=CC=C(C(C(C=C2)=CC=C2OC(C=C3)=CC=C3C(CCC(O)=O)(C)C4=CC=CC=C4)=O)C=C1	0.7	20.3629	318.741	3.87662	1.4981	5.25275
658	N=P(OC1=CC=C(F)C=C1)OC2=CC=C(OCCCCS(=O)(O)=O)C=C2	OC1=CC=C(C(C2=CC=C(OC3=CC=C(C(C4=CC=CC=C4)=O)C=C3)C=C2)=O)C=C1	0.6	17.6126	300.785	3.36898	1.1644	5.22788
1523	O=C(C1=CC=C(OC2=CC(C3=CC(OC)=C(S(=O)(O)=O)C=C3)=C(O)C=C2)C=C1)C4=CC=CC=C4	O=CC1=CC=C(OC2=CC=C(C3=NC4=C(C=C(C5=CC(N=CN6)=C6C=C5)C=C4)N3)C=C2)C=C1	0.8	20.3562	286.225	3.89805	1.3711	5.22215
874	O=C(C1=CC=C(OC2=CC(C3=CC(OC)=C(S(=O)(O)=O)C=C3)=C(O)C=C2)C=C1)C4=CC=CC=C4	O=C1N(C2=CC=CC=C2C(F)(F)F)C(C3=CC=CC4=C3C1=CC=C4)=O	0.7	19.0207	269.028	3.66319	1.32007	5.1924
555	OC1=CC=CC(OC2=CC=C(C=CC=C3)C3=C2)=C1C(C4=C(S(=O)(O)=O)C=CC=C4)=O	OC1=CC=C(C(C2=CC=C(OC3=CC=C(C(C4=CC=CC=C4)=O)C=C3)C=C2)=O)C=C1	0.6	19.161	319.146	3.69384	1.13504	5.18728
553	OC1=CC=CC(OC2=CC=C(C=CC=C3)C3=C2)=C1C(C4=C(S(=O)(O)=O)C=CC=C4)=O	O=C(C1=CC=CC=C1)C2=CC=C(C(C3=CC=CC=C3)=O)C=C2	0.6	19.0055	303.487	3.67272	1.05317	5.17479
1697	O=C(C1=CC=C(OC2=CC=C(S(=O)(O)=O)C=C2)C=C1)C3=CC=CC=C3	SC1=CC(C=C2)=C(C=C1)C=C2SC3=C(C#N)C=CC=C3	0.8	20.9128	269.399	4.0422	1.08725	5.17363
534	OC1=CC=CC(OC2=CC=C(C=CC=C3)C3=C2)=C1C(C4=C(S(=O)(O)=O)C=CC=C4)=O	OC1=CC=C(OC2=CC=C(OC3=CC=C(S(C4=CC=CC=C4)(=O)=O)C=C3)C=C2)C=C1	0.6	18.9609	328.138	3.67684	1.17355	5.15684
565	OC1=CC=CC(OC2=CC=C(C=CC=C3)C3=C2)=C1C(C4=C(S(=O)(O)=O)C=CC=C4)=O	OC1=CC=C(C2=CC=C(C3=CC=CC=C3C#N)C=C2)C=C1	0.6	18.955	313.011	3.68027	1.0797	5.15042
883	O=C(C1=CC=C(OC2=CC(C3=CC(OC)=C(S(=O)(O)=O)C=C3)=C(O)C=C2)C=C1)C4=CC=CC=C4	O=C(C1=CC=C(CCC)C=C1)C2=CC=CC=C2	0.7	19.7573	311.533	3.84443	1.32465	5.1392
924	O=C(C1=CC=C(OC2=CC(C3=CC(OC)=C(S(=O)(O)=O)C=C3)=C(O)C=C2)C=C1)C4=CC=CC=C4	O=C(C1=CC=C(C2=CC=C(OC3=CC=CC=C3)C=C2)C=C1)C4=CC=CC=C4	0.7	18.0496	321.183	3.5146	1.44275	5.13562
873	O=C(C1=CC=C(OC2=CC(C3=CC(OC)=C(S(=O)(O)=O)C=C3)=C(O)C=C2)C=C1)C4=CC=CC=C4	OC1=CC=C(OC2=CC=C(OC3=CC=C(S(C4=CC=CC=C4)(=O)=O)C=C3)C=C2)C=C1	0.7	18.1123	335.89	3.53319	1.60044	5.12633
893	O=C(C1=CC=C(OC2=CC(C3=CC(OC)=C(S(=O)(O)=O)C=C3)=C(O)C=C2)C=C1)C4=CC=CC=C4	OC(C=C1)=CC=C1C(C=C2)=CC=C2OC3=C(C#N)C=CC=C3	0.7	20.05	315.564	3.91937	1.63521	5.11561
443	O=C(C1=CC(S(=O)(O)=O)=CC=C1)C2=CC=CC=C2	O=P(C1=CC=C(OC2=CC=C(O)C=C2)C=C1)(C3=CC=CC=C3)C4=CC=CC=C4	0.6	20.0685	297.847	3.92329	1.07809	5.11522
897	O=C(C1=CC=C(OC2=CC(C3=CC(OC)=C(S(=O)(O)=O)C=C3)=C(O)C=C2)C=C1)C4=CC=CC=C4	O=S(C1=CC=C(OC2=CC=CC=C2C3=CC=C(F)C=C3)C=C1)(C4=CC=C(O)C=C4)=O	0.7	19.6881	323.014	3.85061	1.58122	5.11298
887	O=C(C1=CC=C(OC2=CC(C3=CC(OC)=C(S(=O)(O)=O)C=C3)=C(O)C=C2)C=C1)C4=CC=CC=C4	O=S(C1=CC=C(O)C=C1)(C2=CC=C(OC3=CC=C(C=CC=C4)C4=C3)C=C2)=O	0.7	19.864	318.889	3.88758	1.46216	5.10961
2961	O=C(C1=CC=C(OC2=CC=C(S(=O)(O)=O)C=C2)C=C1)C3=CC=CC=C3	O=P(C1=CC=C(SC2=CC=C(SC3=CC=C(S)C=C3)C=C2)C=C1)(C4=CC=CC=C4)C5=CC=CC=C5	0.9	23.134	296.416	4.56015	1.06521	5.07309
376	O=S(C1=C(OC2=CC=C(C3=NC4=C(C=C(N=CS5)C5=C4)S3)C=C2S(=O)(O)=O)C=CC=C1)(O)=O	OC(C=C1)=CC=C1P(C(C=C2)=CC=C2OC(C=C3)=CC=C3C(C4=CC=CC(C(C5=CC=CC=C5)=O)=C4)=O)(C6=CC=CC=C6)=O	0.6	19.3508	328.384	3.81626	1.31783	5.07062
136	O=S(C1=CC=CC(C2=CC=CC(S(=O)(O)=O)=C2)=C1)(O)=O	O=C(C1=CC(C(C2=CC=CC=C2)=O)=CC=C1)C(C=C3)=CC=C3OC4=CC=C(O)C=C4	0.4	21.2352	296.88	4.19813	1.08475	5.05826
895	O=C(C1=CC=C(OC2=CC(C3=CC(OC)=C(S(=O)(O)=O)C=C3)=C(O)C=C2)C=C1)C4=CC=CC=C4	O=C(C1=CC=CC=C1)C2=CC=C(C(C3=CC=CC=C3)=O)C=C2	0.7	18.457	311.916	3.6714	1.31163	5.02722
872	O=C(C1=CC=C(OC2=CC(C3=CC(OC)=C(S(=O)(O)=O)C=C3)=C(O)C=C2)C=C1)C4=CC=CC=C4	O=S(C1=CC=CC=C1)(C2=CC=C(OC3=CC=C(C=CC(O)=C4)C4=C3)C=C2)=O	0.7	19.6679	321.832	3.91507	1.46251	5.02364
908	O=C(C1=CC=C(OC2=CC(C3=CC(OC)=C(S(=O)(O)=O)C=C3)=C(O)C=C2)C=C1)C4=CC=CC=C4	O=C(C1=CC=CC=C1)C2=CC=CC=C2	0.7	18.9613	312.577	3.7797	1.35033	5.01662
877	O=C(C1=CC=C(OC2=CC(C3=CC(OC)=C(S(=O)(O)=O)C=C3)=C(O)C=C2)C=C1)C4=CC=CC=C4	O=S(C1=CC=CC=C1)(C2=CC=C(OC3=CC=C(O)C(C(C)(C)C)=C3)C=C2)=O	0.7	18.6887	322.986	3.72961	1.5993	5.01088
912	O=C(C1=CC=C(OC2=CC(C3=CC(OC)=C(S(=O)(O)=O)C=C3)=C(O)C=C2)C=C1)C4=CC=CC=C4	O=C(C1=CC(C(C2=CC=CC=C2)=O)=CC=C1)C(C=C3)=CC=C3OC4=CC=C(O)C=C4	0.7	18.8564	323.238	3.77336	1.48731	4.99725
1602	O=C(C1=CC=C(OC2=CC(C3=CC(OC)=C(S(=O)(O)=O)C=C3)=C(O)C=C2)C=C1)C4=CC=CC=C4	N#CC1=C(C2=CC=C(OC3=CC=CC=C3)C=C2)C=CC=C1	0.8	20.1976	312.281	4.04186	1.48776	4.9971
911	O=C(C1=CC=C(OC2=CC(C3=CC(OC)=C(S(=O)(O)=O)C=C3)=C(O)C=C2)C=C1)C4=CC=CC=C4	O=S(C1=CC=C(O)C=C1)(C2=CC=C(OC3=CC=CC=C3)C=C2)=O	0.7	19.5179	323.938	3.91099	1.57482	4.99052
3089	O=C(C1=CC=C(OC2=CC=C(S(=O)(O)=O)C=C2)C=C1)C3=CC=CC=C3	SC(C=C1)=CC=C1SC(C=C2)=CC=C2SC3=C(C#N)C=CC=C3	0.9	24.329	288.523	4.90272	1.07128	4.96235
1704	O=C(C1=CC=C(OC2=CC=C(S(=O)(O)=O)C=C2)C=C1)C3=CC=CC=C3	N#CC1=C(C2=CC=C(OC3=CC=CC=C3)C=C2)C=CC=C1	0.8	21.4769	268.069	4.32808	1.17177	4.96222
890	O=C(C1=CC=C(OC2=CC(C3=CC(OC)=C(S(=O)(O)=O)C=C3)=C(O)C=C2)C=C1)C4=CC=CC=C4	O=S(C1=CC=CC=C1)(C2=CC=C(OC3=CC=C(O)C(C4=CC=CC=C4)=C3)C=C2)=O	0.7	19.3995	327.23	3.91793	1.54199	4.95146
169	OC1=CC(S(=O)(O)=O)=C(OC2=CC=CC=C2C#N)C=C1	O=C(C1=CC(C2=C(OC)C=CC=C2)=C(OC)C=C1)C(C=C3)=CC=C3OC4=CC=C(C(O)=O)C=C4	0.4	18.1728	278.861	3.68158	1.56971	4.93613
3088	O=C(C1=CC=C(OC2=CC=C(S(=O)(O)=O)C=C2)C=C1)C3=CC=CC=C3	SC1=CC(C=C2)=C(C=C1)C=C2SC3=C(C#N)C=CC=C3	0.9	24.2786	270.033	4.93182	1.07393	4.92284
913	O=C(C1=CC=C(OC2=CC(C3=CC(OC)=C(S(=O)(O)=O)C=C3)=C(O)C=C2)C=C1)C4=CC=CC=C4	OC1=CC=C(C2=CC=C(C3=CC=CC=C3C#N)C=C2)C=C1	0.7	19.1869	315.036	3.90968	1.44253	4.90755
164	O=S(C1=CC=CC(S(=O)(O)=O)=C1)(C2=CC(S(=O)(O)=O)=C(SC3=CC(C=CC(S)=C4)=C4C=C3)C=C2)=O	SC(C=C1)=CC=C1SC(C=C2)=CC=C2SC3=C(C#N)C=CC=C3	0.4	19.1946	326.505	3.92795	1.13308	4.88667
891	O=C(C1=CC=C(OC2=CC(C3=CC(OC)=C(S(=O)(O)=O)C=C3)=C(O)C=C2)C=C1)C4=CC=CC=C4	O=S(C1=CC=CC=C1)(C2=CC=C(OC3=CC=C(O)C=C3)C=C2)=O	0.7	19.5329	329.687	3.99866	1.55428	4.88487
892	O=C(C1=CC=C(OC2=CC(C3=CC(OC)=C(S(=O)(O)=O)C=C3)=C(O)C=C2)C=C1)C4=CC=CC=C4	O=S(C1=CC=CC=C1)(C2=CC=C(OC3=CC=C(O)C(C4=CC=C(F)C=C4)=C3)C=C2)=O	0.7	18.8402	327.937	3.87353	1.52358	4.86384
532	OC1=CC=CC(OC2=CC=C(C=CC=C3)C3=C2)=C1C(C4=C(S(=O)(O)=O)C=CC=C4)=O	O=S(C1=CC=C(O)C=C1)(C2=CC=C(OC3=CC=C(C(C4=CC=CC=C4)=O)C=C3)C=C2)=O	0.6	19.0623	315.032	3.93177	1.14449	4.84828
526	O=C(C1=CC=C(OC2=CC=C(S(=O)(O)=O)C=C2)C=C1)C3=CC=CC=C3	N=P(OC1=CC=C(F)C=C1)OC2=CC=C(OC)C=C2	0.6	18.536	301.892	3.82783	1.23975	4.84243
426	O=C(C1=CC(S(=O)(O)=O)=CC=C1)C2=CC=CC=C2	O=S(C(C=C1)=CC=C1OC(C=C2)=CC=C2C3=CC=C(O)C=C3)(C4=CC=CC=C4)=O	0.6	20.5257	279.831	4.24157	1.19042	4.83917
438	O=C(C1=CC(S(=O)(O)=O)=CC=C1)C2=CC=CC=C2	SC1=CC=C(SC2=CC=C(SC3=CC=C(S(C4=CC=CC=C4)(=O)=O)C=C3)C=C2)C=C1	0.6	20.2042	279.701	4.17605	1.19001	4.83811
2980	O=C(C1=CC=C(OC2=CC=C(S(=O)(O)=O)C=C2)C=C1)C3=CC=CC=C3	C1(C2=NC3=CC=C(C4=CC=C(NC=N5)C5=C4)C=C3N2)=CC=CC6=C1C=CC=C6	0.9	22.5168	278.726	4.65778	1.05667	4.83422
306	O=S(C1=CC=CC(C2=CC=CC(S(=O)(O)=O)=C2)=C1)(O)=O	O=C(C1=CC(C(C2=CC=CC=C2)=O)=CC=C1)C(C=C3)=CC=C3OC4=CC=C(O)C=C4	0.5	21.1668	280.888	4.37967	1.10543	4.83296
95	SC(C=C1)=CC=C1SC(C=C2)=CC=C2SC(C(S(=O)(O)=O)=C3)=CC=C3S(C4=CC(S(=O)(O)=O)=CC=C4)(=O)=O	O=C(C1=CC=CC=C1)C2=CC=C(C(C3=CC=CC=C3)=O)C=C2	0.4	17.6453	279.632	3.66211	1.19764	4.81834
886	O=C(C1=CC=C(OC2=CC(C3=CC(OC)=C(S(=O)(O)=O)C=C3)=C(O)C=C2)C=C1)C4=CC=CC=C4	OC1=CC=CC(OC2=CC=C(C=CC=C3)C3=C2)=C1C#N	0.7	19.6384	309.517	4.07871	1.48371	4.81486
1528	O=C(C1=CC=C(OC2=CC(C3=CC(OC)=C(S(=O)(O)=O)C=C3)=C(O)C=C2)C=C1)C4=CC=CC=C4	C1(C2=CC3=CC=CC=C3C=C2)=NC4=CC=C(C5=CC=C(NC=N6)C6=C5)C=C4N1	0.8	19.6653	282.556	4.08906	1.35394	4.80925
108	O=C(C1=CC=C(OCCCS(=O)(O)=O)C=C1)C2=CC=C(C(C3=CC=C(OCCCS(=O)(O)=O)C=C3)=O)C=C2	O=P(C1=CC=C(OC2=CC=C(O)C=C2)C=C1)(C3=CC=CC=C3)C4=CC=CC=C4	0.4	17.8944	337.011	3.72619	1.18054	4.80233
1550	O=C(C1=CC=C(OC2=CC(C3=CC(OC)=C(S(=O)(O)=O)C=C3)=C(O)C=C2)C=C1)C4=CC=CC=C4	O=C(C1=CC=C(OC2=CC=C(C(C)(C)C3=CC=C(O)C=C3)C=C2)C=C1)C4=CC=CC=C4	0.8	24.4361	319.189	5.09685	1.55224	4.79436
537	OC1=CC=CC(OC2=CC=C(C=CC=C3)C3=C2)=C1C(C4=C(S(=O)(O)=O)C=CC=C4)=O	CCC1=CC=C(OCCCC)C=C1	0.6	17.5874	308.436	3.67081	1.01317	4.79115
459	O=C(C1=CC(S(=O)(O)=O)=CC=C1)C2=CC=CC=C2	OC1=CC=C(C(C2=C(C(O)=O)C=CC=C2)C3=CC=C(OC4=CC=CC=C4C#N)C=C3)C=C1	0.6	19.9842	270.71	4.17497	1.37327	4.78666
1058	OC1=CC=CC(OC2=CC=C(C=CC=C3)C3=C2)=C1C(C4=C(S(=O)(O)=O)C=CC=C4)=O	SC1=CC(C=C2)=C(C=C1)C=C2SC3=C(C#N)C=CC=C3	0.7	17.7078	325.117	3.70776	1.02937	4.77588
1544	O=C(C1=CC=C(OC2=CC(C3=CC(OC)=C(S(=O)(O)=O)C=C3)=C(O)C=C2)C=C1)C4=CC=CC=C4	CCC1=CC=C(OCCCC)C=C1	0.8	20.1845	316.596	4.23459	1.47403	4.76657
907	O=C(C1=CC=C(OC2=CC(C3=CC(OC)=C(S(=O)(O)=O)C=C3)=C(O)C=C2)C=C1)C4=CC=CC=C4	O=C(C1=C2C(C=CC=C23)=CC=C1)N(C4=CC=CC(C(C5=CC=CC=C5)=O)=C4)C3=O	0.7	18.0255	269.384	3.78501	1.29018	4.76233
37	O=S(C1=CC=CC(C2=CC=CC(S(=O)(O)=O)=C2)=C1)(O)=O	O=C(C1=CC(C(C2=CC=CC=C2)=O)=CC=C1)C(C=C3)=CC=C3OC4=CC=C(O)C=C4	0.3	19.9369	311.609	4.18926	1.13005	4.75905
918	O=C(C1=CC=C(OC2=CC(C3=CC(OC)=C(S(=O)(O)=O)C=C3)=C(O)C=C2)C=C1)C4=CC=CC=C4	O=CC1=CC=CC(C(NC2=CC=CC(C(C(F)(F)F)(C(F)(F)F)C3=CC=C(N)C=C3)=C2)=O)=C1	0.7	18.9702	283.826	3.99164	1.30776	4.75247
530	OC1=CC=CC(OC2=CC=C(C=CC=C3)C3=C2)=C1C(C4=C(S(=O)(O)=O)C=CC=C4)=O	O=S(C(C=C1)=CC=C1OC(C=C2)=CC=C2C3=CC=C(O)C=C3)(C4=CC=CC=C4)=O	0.6	18.3946	322.246	3.87249	1.16222	4.75009
230	O=C(C1=CC(S(=O)(O)=O)=CC=C1)C2=CC=CC=C2	O=C(C1=CC(C(C2=CC=CC=C2)=O)=CC=C1)C(C=C3)=CC=C3OC4=CC=C(O)C=C4	0.5	19.5683	274.66	4.12552	1.17774	4.74322
1698	O=C(C1=CC=C(OC2=CC=C(S(=O)(O)=O)C=C2)C=C1)C3=CC=CC=C3	SC(C=C1)=CC=C1SC(C=C2)=CC=C2SC3=C(C#N)C=CC=C3	0.8	20.2595	292.756	4.28934	1.08298	4.72322
77	O=S(C1=CC=CC=C1OC2=C(S(=O)(O)=O)C=C(C3=NC4=CC5=C(N=CS5)C=C4S3)C=C2)(O)=O	O=C(C1=CC(C(C2=CC=CC=C2)=O)=CC=C1)C(C=C3)=CC=C3OC4=CC=C(O)C=C4	0.4	18.2767	319.149	3.86982	1.12432	4.72288
547	OC1=CC=CC(OC2=CC=C(C=CC=C3)C3=C2)=C1C(C4=C(S(=O)(O)=O)C=CC=C4)=O	O=S(C1=CC=CC=C1)(C2=CC=C(OC3=CC=C(O)C(C4=CC=CC=C4)=C3)C=C2)=O	0.6	18.5045	329.149	3.93843	1.14075	4.69846
866	O=C(C1=CC=C(OC2=CC(C3=CC(OC)=C(S(=O)(O)=O)C=C3)=C(O)C=C2)C=C1)C4=CC=CC=C4	O=S(C1=CC=CC=C1)(C2=CC=C(OC3=CC=C(O)C(C4=CC(F)=C(F)C=C4)=C3)C=C2)=O	0.7	19.051	336.194	4.05534	1.52313	4.69776
453	O=C(C1=CC(S(=O)(O)=O)=CC=C1)C2=CC=CC=C2	O=S(C1=CC=CC=C1)(C2=CC=C(OC3=CC=C(C=C(O)C=C4)C4=C3)C=C2)=O	0.6	20.8489	269.401	4.43874	1.14875	4.69704
898	O=C(C1=CC=C(OC2=CC(C3=CC(OC)=C(S(=O)(O)=O)C=C3)=C(O)C=C2)C=C1)C4=CC=CC=C4	OC1=CC=C(S(=O)(C2=CC=C(OC3=CC=C(S(C4=CC=CC=C4)(=O)=O)C=C3)C=C2)=O)C=C1	0.7	18.8267	334.426	4.01122	1.39926	4.69351
549	OC1=CC=CC(OC2=CC=C(C=CC=C3)C3=C2)=C1C(C4=C(S(=O)(O)=O)C=CC=C4)=O	O=S(C1=CC=CC=C1)(C2=CC=C(OC3=CC=C(O)C(C4=CC=C(F)C=C4)=C3)C=C2)=O	0.6	17.74	338.414	3.78292	1.14006	4.6895
3097	O=C(C1=CC=C(OC2=CC=C(S(=O)(O)=O)C=C2)C=C1)C3=CC=CC=C3	N#CC1=C(C2=CC=C(OC3=CC=CC=C3)C=C2)C=CC=C1	0.9	23.636	275.583	5.05054	1.12956	4.67989
1522	O=C(C1=CC=C(OC2=CC(C3=CC(OC)=C(S(=O)(O)=O)C=C3)=C(O)C=C2)C=C1)C4=CC=CC=C4	FC(C(C1=CC=C(C2=NC3=C(C=C(N=CS4)C4=C3)S2)C=C1)(C(F)(F)F)C5=CC=CC=C5)(F)F	0.8	19.9326	311.377	4.26197	1.40159	4.67684
384	O=S(C1=C(OC2=CC=C(C3=NC4=C(C=C(N=CS5)C5=C4)S3)C=C2S(=O)(O)=O)C=CC=C1)(O)=O	OC1=CC=C(C(C2=CC=C(OC3=CC=C(C(C4=CC=CC=C4)=O)C=C3)C=C2)=O)C=C1	0.6	20.2976	323.246	4.34464	1.29006	4.67187
444	O=C(C1=CC(S(=O)(O)=O)=CC=C1)C2=CC=CC=C2	O=S(C1=CC=CC=C1)(C2=CC=C(OC3=CC=C(O)C(C4=CC=CC=C4)=C3)C=C2)=O	0.6	20.4371	282.22	4.37607	1.18523	4.67019
558	OC1=CC=CC(OC2=CC=C(C=CC=C3)C3=C2)=C1C(C4=C(S(=O)(O)=O)C=CC=C4)=O	OC1=CC=C(S(C2=CC=C(OC3=CC=C(C4=CC=CC=C4)C=C3)C=C2)(=O)=O)C=C1	0.6	18.5166	316.98	3.97727	1.16109	4.65562
256	O=C(C1=CC=C(OC2=CC=C(S(=O)(O)=O)C=C2)C=C1)C3=CC=CC=C3	O=C(C1=CC=C(C=C1)F)C2=CC=C(C=C2)OC3=CC=C(C=C3)C(C)(C4=CC=C(C=C4)O)C	0.5	17.886	323.661	3.84312	1.26358	4.65404
901	O=C(C1=CC=C(OC2=CC(C3=CC(OC)=C(S(=O)(O)=O)C=C3)=C(O)C=C2)C=C1)C4=CC=CC=C4	O=C(NC1=O)C2=CC=C3C4=C2C1=CC=C4C(N(CCCCCCCCCC)C3=O)=O	0.7	18.0278	272.661	3.87405	1.23673	4.65348
533	OC1=CC=CC(OC2=CC=C(C=CC=C3)C3=C2)=C1C(C4=C(S(=O)(O)=O)C=CC=C4)=O	O=S(C1=CC=CC=C1)(C2=CC=C(OC3=CC=C(C=CC(O)=C4)C4=C3)C=C2)=O	0.6	18.4196	316.016	3.96099	1.10203	4.65024
570	OC1=CC=CC(OC2=CC=C(C=CC=C3)C3=C2)=C1C(C4=C(S(=O)(O)=O)C=CC=C4)=O	OC1=CC=C(C(C2=C(C(O)=O)C=CC=C2)C3=CC=C(OC4=CC=CC=C4C#N)C=C3)C=C1	0.6	18.7864	309.945	4.04141	1.3154	4.64846
432	O=C(C1=CC(S(=O)(O)=O)=CC=C1)C2=CC=CC=C2	O=S(C1=C(C2=NC3=C(C=C(N=CS4)C4=C3)S2)C=CC=C1)(C5=CC=CC=C5)=O	0.6	19.5099	273.994	4.21267	1.31938	4.63123
923	O=C(C1=CC=C(OC2=CC(C3=CC(OC)=C(S(=O)(O)=O)C=C3)=C(O)C=C2)C=C1)C4=CC=CC=C4	OC1=CC=C(C(C2=C(C(O)=O)C=CC=C2)C3=CC=C(OC4=CC=CC=C4C#N)C=C3)C=C1	0.7	18.3381	311.865	3.96081	1.62969	4.6299
557	OC1=CC=CC(OC2=CC=C(C=CC=C3)C3=C2)=C1C(C4=C(S(=O)(O)=O)C=CC=C4)=O	OC1=CC=C(C(C(C=C2)=CC=C2OC(C=C3)=CC=C3C(CCC(O)=O)(C)C4=CC=CC=C4)=O)C=C1	0.6	18.9174	323.122	4.09599	1.29198	4.61852
982	O=C(C1=CC=C(OC2=CC=C(S(=O)(O)=O)C=C2)C=C1)C3=CC=CC=C3	N=P(OC1=CC=C(F)C=C1)OC2=CC=C(OC)C=C2	0.7	19.893	278.636	4.31481	1.22311	4.6104
561	OC1=CC=CC(OC2=CC=C(C=CC=C3)C3=C2)=C1C(C4=C(S(=O)(O)=O)C=CC=C4)=O	O=C(C1=CC=CC=C1)C2=CC=CC=C2	0.6	19.4178	301.329	4.21625	1.05857	4.60546
1517	O=C(C1=CC=C(OC2=CC(C3=CC(OC)=C(S(=O)(O)=O)C=C3)=C(O)C=C2)C=C1)C4=CC=CC=C4	O=C(C1=CC=C(C=C1)F)C2=CC=C(C=C2)OC3=CC=C(C=C3)C(C)(C4=CC=C(C=C4)O)C	0.8	23.3285	320.461	5.08518	1.56204	4.58756
1062	OC1=CC=CC(OC2=CC=C(C=CC=C3)C3=C2)=C1C(C4=C(S(=O)(O)=O)C=CC=C4)=O	N#CC1=C(C2=CC=C(OC3=CC=CC=C3)C=C2)C=CC=C1	0.7	18.8786	302.227	4.13274	1.16146	4.56806
3014	O=C(C1=CC=C(OC2=CC=C(S(=O)(O)=O)C=C2)C=C1)C3=CC=CC=C3	CCC1=CC=C(OCCCC)C=C1	0.9	23.8483	276.707	5.24542	1.17262	4.5465
469	C=C(C1=CC(S(=O)(O)=O)=CC=C1)C2=CC=CC=C2	SC1=CC=C(SC2=CC=C(SC3=CC=C(S(C4=CC=CC=C4)(=O)=O)C=C3)C=C2)C=C1	0.6	17.8892	308.537	3.96181	1.14776	4.51541
535	OC1=CC=CC(OC2=CC=C(C=CC=C3)C3=C2)=C1C(C4=C(S(=O)(O)=O)C=CC=C4)=O	CC(C)(C1=CC=C(OC2=CC=C(S(C3=CC=CC=C3)(=O)=O)C=C2)C=C1)C4=CC=C(O)C=C4	0.6	17.5884	324.522	3.89621	1.21266	4.51422
258	O=C(C1=CC=C(OC2=CC=C(S(=O)(O)=O)C=C2)C=C1)C3=CC=CC=C3	O=C(C1=CC(C2=C(OC)C=CC=C2)=C(OC)C=C1)C(C=C3)=CC=C3OC4=CC=C(C(O)=O)C=C4	0.5	18.135	288.193	4.03481	1.33752	4.49464
536	OC1=CC=CC(OC2=CC=C(C=CC=C3)C3=C2)=C1C(C4=C(S(=O)(O)=O)C=CC=C4)=O	O=S(C1=CC=CC=C1)(C2=CC=C(OC3=CC=C(O)C(C(C)(C)C)=C3)C=C2)=O	0.6	17.6949	316.272	3.94322	1.19139	4.48744
1534	O=C(C1=CC=C(OC2=CC(C3=CC(OC)=C(S(=O)(O)=O)C=C3)=C(O)C=C2)C=C1)C4=CC=CC=C4	O=S(C1=CC=C(O)C=C1)(C2=CC=C(OC3=CC=C(C(C4=CC=CC=C4)=O)C=C3)C=C2)=O	0.8	21.9865	321.538	4.90364	1.44805	4.48372
567	OC1=CC=CC(OC2=CC=C(C=CC=C3)C3=C2)=C1C(C4=C(S(=O)(O)=O)C=CC=C4)=O	O=CC1=CC=CC(C(NC2=CC=CC(C(C(F)(F)F)(C(F)(F)F)C3=CC=C(N)C=C3)=C2)=O)=C1	0.6	17.7367	276.391	3.96082	0.965682	4.47805
563	OC1=CC=CC(OC2=CC=C(C=CC=C3)C3=C2)=C1C(C4=C(S(=O)(O)=O)C=CC=C4)=O	O=S(C1=CC=C(O)C=C1)(C2=CC=C(OC3=CC=CC=C3)C=C2)=O	0.6	18.7167	315.706	4.1995	1.14911	4.45689
830	O=C(C1=CC(S(=O)(O)=O)=CC=C1)C2=CC=CC=C2	OC1=CC=C(OC2=CC=C(OC3=CC=C(S(C4=CC=CC=C4)(=O)=O)C=C3)C=C2)C=C1	0.7	21.0795	267.646	4.73954	1.18288	4.44758
876	O=C(C1=CC=C(OC2=CC(C3=CC(OC)=C(S(=O)(O)=O)C=C3)=C(O)C=C2)C=C1)C4=CC=CC=C4	O=C(C1=CC=CC=C1)C(C=C2)=CC=C2OC(C(C)=C3)=C(C)C=C3C4=CC(C)=C(O)C(C)=C4	0.7	17.6266	321.201	3.96515	1.466	4.44537
204	O=S(C1=C(OC2=CC=C(C3=NC4=C(C=C(N=CS5)C5=C4)S3)C=C2S(=O)(O)=O)C=CC=C1)(O)=O	O=C(C1=CC(C(C2=CC=CC=C2)=O)=CC=C1)C(C=C3)=CC=C3OC4=CC=C(O)C=C4	0.5	19.4657	320.83	4.39428	1.28123	4.42978
548	OC1=CC=CC(OC2=CC=C(C=CC=C3)C3=C2)=C1C(C4=C(S(=O)(O)=O)C=CC=C4)=O	O=S(C1=CC=CC=C1)(C2=CC=C(OC3=CC=C(O)C=C3)C=C2)=O	0.6	18.7917	318.707	4.24638	1.11698	4.42535
884	O=C(C1=CC=C(OC2=CC(C3=CC(OC)=C(S(=O)(O)=O)C=C3)=C(O)C=C2)C=C1)C4=CC=CC=C4	O=C(NC1=O)C2=CC=C3C4=C2C1=CC=C4C(N(C5=CC=C(OC6=CC=CC=C6)C=C5)C3=O)=O	0.7	17.9445	282.641	4.06032	1.41075	4.41947
847	C=C(C1=CC(S(=O)(O)=O)=CC=C1)C2=CC=CC=C2	SC1=CC=C(SC2=CC=C(SC3=CC=C(S(C4=CC=CC=C4)(=O)=O)C=C3)C=C2)C=C1	0.7	17.905	302.452	4.06683	1.15931	4.40269
529	OC1=CC=CC(OC2=CC=C(C=CC=C3)C3=C2)=C1C(C4=C(S(=O)(O)=O)C=CC=C4)=O	O=S(C1=CC=CC=C1)(C2=CC=C(OC3=CC=C(O)C(C4=CC(F)=C(F)C=C4)=C3)C=C2)=O	0.6	17.5019	334.344	3.97897	1.12259	4.39859
382	O=S(C1=C(OC2=CC=C(C3=NC4=C(C=C(N=CS5)C5=C4)S3)C=C2S(=O)(O)=O)C=CC=C1)(O)=O	O=C(C1=CC=CC=C1)C2=CC=C(C(C3=CC=CC=C3)=O)C=C2	0.6	18.6975	286.899	4.25585	1.24427	4.39336
386	O=S(C1=C(OC2=CC=C(C3=NC4=C(C=C(N=CS5)C5=C4)S3)C=C2S(=O)(O)=O)C=CC=C1)(O)=O	O=C(C1=CC(C(C2=CC=CC=C2)=O)=CC=C1)C(C=C3)=CC=C3OC4=CC=C(C5=CC=C(O)C=C5)C=C4	0.6	18.7422	329.164	4.26643	1.30432	4.39295
96	SC(C=C1)=CC=C1SC(C=C2)=CC=C2SC(C(S(=O)(O)=O)=C3)=CC=C3S(C4=CC(S(=O)(O)=O)=CC=C4)(=O)=O	O=C(C1=CC=CC=C1)C2=CC=CC=C2	0.4	17.6343	274.077	4.02074	1.16698	4.38584
541	OC1=CC=CC(OC2=CC=C(C=CC=C3)C3=C2)=C1C(C4=C(S(=O)(O)=O)C=CC=C4)=O	O=C(C1=CC=C(CCC)C=C1)C2=CC=CC=C2	0.6	18.8022	305.437	4.28886	1.06048	4.38397
1576	O=C(C1=CC=C(OC2=CC(C3=CC(OC)=C(S(=O)(O)=O)C=C3)=C(O)C=C2)C=C1)C4=CC=CC=C4	OC1=CC=C(S(C2=CC=C(OC3=CC=C(C4=CC=CC=C4)C=C3)C=C2)(=O)=O)C=C1	0.8	21.7159	321.708	4.95451	1.46271	4.38306
98	SC(C=C1)=CC=C1SC(C=C2)=CC=C2SC(C(S(=O)(O)=O)=C3)=CC=C3S(C4=CC(S(=O)(O)=O)=CC=C4)(=O)=O	SC(C=C1)=CC=C1SC(C=C2)=CC=C2SC3=C(C#N)C=CC=C3	0.4	19.0696	327.461	4.35089	1.16974	4.38291
430	O=C(C1=CC(S(=O)(O)=O)=CC=C1)C2=CC=CC=C2	OC1=CC=C(OC2=CC=C(OC3=CC=C(S(C4=CC=CC=C4)(=O)=O)C=C3)C=C2)C=C1	0.6	20.0601	303.823	4.58179	1.15254	4.37821
985	O=C(C1=CC=C(OC2=CC=C(S(=O)(O)=O)C=C2)C=C1)C3=CC=CC=C3	SC1=CC(C=C2)=C(C=C1)C=C2SC3=C(C#N)C=CC=C3	0.7	18.1692	274.996	4.1796	1.12947	4.34711
83	O=C(C1=CC(S(=O)(O)=O)=CC=C1)C2=CC=CC=C2	SC1=CC=C(SC2=CC=C(SC3=CC=C(S(C4=CC=CC=C4)(=O)=O)C=C3)C=C2)C=C1	0.4	17.629	346.988	4.08101	1.13001	4.31976
1572	O=C(C1=CC=C(OC2=CC(C3=CC(OC)=C(S(=O)(O)=O)C=C3)=C(O)C=C2)C=C1)C4=CC=CC=C4	OC1=CC=C(C(C2=CC=C(OC3=CC=C(C(C4=CC=CC=C4)=O)C=C3)C=C2)=O)C=C1	0.8	20.6372	319.735	4.78274	1.46913	4.31492
1549	O=C(C1=CC=C(OC2=CC(C3=CC(OC)=C(S(=O)(O)=O)C=C3)=C(O)C=C2)C=C1)C4=CC=CC=C4	SC1=CC=C(SC2=CC=C(SC3=CC=C(S(C4=CC=CC=C4)(=O)=O)C=C3)C=C2)C=C1	0.8	19.1436	342.231	4.44218	1.41401	4.3095
715	O=S(C1=C(OC2=CC=C(C3=NC4=C(C=C(N=CS5)C5=C4)S3)C=C2S(=O)(O)=O)C=CC=C1)(O)=O	OC(C=C1)=CC=C1P(C(C=C2)=CC=C2OC(C=C3)=CC=C3C(C4=CC=CC(C(C5=CC=CC=C5)=O)=C4)=O)(C6=CC=CC=C6)=O	0.7	17.7269	347.137	4.11905	1.29696	4.30364
1610	O=C(C1=CC=C(OC2=CC=C(S(=O)(O)=O)C=C2)C=C1)C3=CC=CC=C3	O=P(C1=CC=C(SC2=CC=C(SC3=CC=C(S)C=C3)C=C2)C=C1)(C4=CC=CC=C4)C5=CC=CC=C5	0.8	18.8606	318.538	4.40046	1.07219	4.28606
203	O=S(C1=C(OC2=CC=C(C3=NC4=C(C=C(N=CS5)C5=C4)S3)C=C2S(=O)(O)=O)C=CC=C1)(O)=O	O=C(C1=CC(C(C2=CC=CC=C2)=O)=CC=C1)C(C=C3)=CC=C3OC4=CC=C(C5=CC=C(O)C=C5)C=C4	0.5	17.8886	326.462	4.17899	1.30716	4.28059
446	O=C(C1=CC(S(=O)(O)=O)=CC=C1)C2=CC=CC=C2	O=S(C1=CC=CC=C1)(C2=CC=C(OC3=CC=C(O)C(C4=CC=C(F)C=C4)=C3)C=C2)=O	0.6	19.9649	289.397	4.66488	1.19203	4.27982
225	O=C(C1=CC(S(=O)(O)=O)=CC=C1)C2=CC=CC=C2	O=C(C1=CC(C2=C(OC)C=CC=C2)=C(OC)C=C1)C(C=C3)=CC=C3OC4=CC=C(C(O)=O)C=C4	0.5	19.3913	269.406	4.53093	1.22347	4.27975
1054	OC1=CC=CC(OC2=CC=C(C=CC=C3)C3=C2)=C1C(C4=C(S(=O)(O)=O)C=CC=C4)=O	N=P(OC1=CC=C(F)C=C1)OC2=CC=C(OC)C=C2	0.7	18.9667	290.192	4.43947	1.21657	4.27228
1559	O=C(C1=CC=C(OC2=CC(C3=CC(OC)=C(S(=O)(O)=O)C=C3)=C(O)C=C2)C=C1)C4=CC=CC=C4	O=S(C1=CC=C(O)C=C1)(C2=CC=C(OC3=CC=C(C=CC=C4)C4=C3)C=C2)=O	0.8	21.6646	316.276	5.08118	1.4372	4.2637
1487	C=C(C1=CC(S(=O)(O)=O)=CC=C1)C2=CC=CC=C2	SC1=CC=C(SC2=CC=C(SC3=CC=C(S(C4=CC=CC=C4)(=O)=O)C=C3)C=C2)C=C1	0.8	18.3713	291.765	4.32191	1.16051	4.25074
445	O=C(C1=CC(S(=O)(O)=O)=CC=C1)C2=CC=CC=C2	O=S(C1=CC=CC=C1)(C2=CC=C(OC3=CC=C(O)C=C3)C=C2)=O	0.6	20.5133	270.663	4.82594	1.21465	4.25064
2974	O=C(C1=CC=C(OC2=CC=C(S(=O)(O)=O)C=C2)C=C1)C3=CC=CC=C3	O=CC1=CC=C(OC2=CC=C(C3=NC4=C(C=C(C5=CC(N=CN6)=C6C=C5)C=C4)N3)C=C2)C=C1	0.9	22.6336	280.186	5.32769	1.04135	4.24829
1570	O=C(C1=CC=C(OC2=CC(C3=CC(OC)=C(S(=O)(O)=O)C=C3)=C(O)C=C2)C=C1)C4=CC=CC=C4	O=S(C1=CC=C(OC2=CC=CC=C2C3=CC=C(F)C=C3)C=C1)(C4=CC=C(O)C=C4)=O	0.8	21.4867	322.933	5.05984	1.47423	4.24651
1560	O=C(C1=CC=C(OC2=CC(C3=CC(OC)=C(S(=O)(O)=O)C=C3)=C(O)C=C2)C=C1)C4=CC=CC=C4	O=P(C1=CC=C(OC2=CC=C(O)C=C2)C=C1)(C3=CC=CC=C3)C4=CC=CC=C4	0.8	21.3476	323.656	5.03375	1.46698	4.2409
1587	O=C(C1=CC=C(OC2=CC(C3=CC(OC)=C(S(=O)(O)=O)C=C3)=C(O)C=C2)C=C1)C4=CC=CC=C4	O=S(C1=CC=C(O)C=C1)(C2=CC=C(OC3=CC=CC=C3)C=C2)=O	0.8	21.3662	322.004	5.0424	1.45963	4.23732
1821	OC1=CC=CC(OC2=CC=C(C=CC=C3)C3=C2)=C1C(C4=C(S(=O)(O)=O)C=CC=C4)=O	SC1=CC(C=C2)=C(C=C1)C=C2SC3=C(C#N)C=CC=C3	0.8	19.6382	317.714	4.64192	1.11652	4.23061
1542	O=C(C1=CC=C(OC2=CC(C3=CC(OC)=C(S(=O)(O)=O)C=C3)=C(O)C=C2)C=C1)C4=CC=CC=C4	O=C(C1=CC=CC=C1)C(C=C2)=CC=C2OC(C(C)=C3)=C(C)C=C3C4=CC(C)=C(O)C(C)=C4	0.8	22.4117	317.644	5.33014	1.46427	4.20472
423	O=C(C1=CC(S(=O)(O)=O)=CC=C1)C2=CC=CC=C2	O=S(C1=CC=CC=C1)(C2=CC=C(OC3=CC=C(O)C(C4=CC(F)=C(F)C=C4)=C3)C=C2)=O	0.6	19.0189	290.641	4.53527	1.18597	4.19355
525	O=C(C1=CC=C(OC2=CC=C(S(=O)(O)=O)C=C2)C=C1)C3=CC=CC=C3	OC1=CC=C(C2=CC=C(C3=CC=CC=C3C#N)C=C2)C=C1	0.6	17.8439	287.911	4.2676	1.24037	4.18125
201	O=S(C1=C(OC2=CC=C(C3=NC4=C(C=C(N=CS5)C5=C4)S3)C=C2S(=O)(O)=O)C=CC=C1)(O)=O	O=C(C1=CC=CC=C1)C2=CC=C(C(C3=CC=CC=C3)=O)C=C2	0.5	18.2455	273.744	4.36584	1.28809	4.17916
1601	O=C(C1=CC=C(OC2=CC(C3=CC(OC)=C(S(=O)(O)=O)C=C3)=C(O)C=C2)C=C1)C4=CC=CC=C4	O=C(C1=CC=C(C2=CC=C(OC3=CC=CC=C3)C=C2)C=C1)C4=CC=CC=C4	0.8	20.7911	316.096	4.98042	1.46817	4.17457
1565	O=C(C1=CC=C(OC2=CC(C3=CC(OC)=C(S(=O)(O)=O)C=C3)=C(O)C=C2)C=C1)C4=CC=CC=C4	OC(C=C1)=CC=C1C(C=C2)=CC=C2OC3=C(C#N)C=CC=C3	0.8	21.3711	318.19	5.1256	1.5659	4.16949
33	O=S(C1=CC=CC(C2=CC=CC(S(=O)(O)=O)=C2)=C1)(O)=O	O=C(C1=CC(C2=C(OC)C=CC=C2)=C(OC)C=C1)C(C=C3)=CC=C3OC4=CC=C(C(O)=O)C=C4	0.3	19.2393	275.634	4.61463	1.3853	4.1692
1521	O=C(C1=CC=C(OC2=CC(C3=CC(OC)=C(S(=O)(O)=O)C=C3)=C(O)C=C2)C=C1)C4=CC=CC=C4	O=S(C(C=C1)=CC=C1OC(C=C2)=CC=C2C3=CC=C(O)C=C3)(C4=CC=CC=C4)=O	0.8	20.7384	326.651	4.97867	1.46312	4.16545
885	O=C(C1=CC=C(OC2=CC(C3=CC(OC)=C(S(=O)(O)=O)C=C3)=C(O)C=C2)C=C1)C4=CC=CC=C4	O=C(NC1=O)C2=CC=C3C4=C2C1=CC=C4C(N(C5=CC6=C(NC7=C6C=C(C)C=C7)C=C5)C3=O)=O	0.7	17.785	270.98	4.27685	1.23112	4.15843
1556	O=C(C1=CC=C(OC2=CC(C3=CC(OC)=C(S(=O)(O)=O)C=C3)=C(O)C=C2)C=C1)C4=CC=CC=C4	OC(C=C1)=CC=C1C(C(F)(F)F)(C(F)(F)F)C(C=C2)=CC=C2OC3=CC=C(C(C4=CC=CC=C4)=O)C=C3	0.8	20.9797	319.761	5.0543	1.4926	4.15085
1515	O=C(C1=CC=C(OC2=CC(C3=CC(OC)=C(S(=O)(O)=O)C=C3)=C(O)C=C2)C=C1)C4=CC=CC=C4	O=S(C1=CC=CC=C1)(C2=CC=C(OC3=CC=C(O)C(C4=CC(F)=C(F)C=C4)=C3)C=C2)=O	0.8	21.2973	323.414	5.13507	1.42622	4.14741
1539	O=C(C1=CC=C(OC2=CC(C3=CC(OC)=C(S(=O)(O)=O)C=C3)=C(O)C=C2)C=C1)C4=CC=CC=C4	CC(C)(C1=CC=C(OC2=CC=C(S(C3=CC=CC=C3)(=O)=O)C=C2)C=C1)C4=CC=C(O)C=C4	0.8	21.1822	322.937	5.10813	1.46849	4.14677
22	O=S(C1=CC=CC(S(=O)(O)=O)=C1)(C2=CC=C(OC3=CC=C(O)C=C3)C(S(=O)(O)=O)=C2)=O	O=C(C1=CC(C2=C(OC)C=CC=C2)=C(OC)C=C1)C(C=C3)=CC=C3OC4=CC=C(C(O)=O)C=C4	0.3	17.9849	300.298	4.34784	1.42149	4.13651
161	O=S(C1=CC=CC(S(=O)(O)=O)=C1)(C2=CC(S(=O)(O)=O)=C(SC3=CC(C=CC(S)=C4)=C4C=C3)C=C2)=O	O=C(C1=CC=CC=C1)C2=CC=C(C(C3=CC=CC=C3)=O)C=C2	0.4	19.51	272.965	4.72515	1.15896	4.12898
242	C=C(C1=CC(S(=O)(O)=O)=CC=C1)C2=CC=CC=C2	SC1=CC=C(SC2=CC=C(SC3=CC=C(S(C4=CC=CC=C4)(=O)=O)C=C3)C=C2)C=C1	0.5	17.7896	312.261	4.32621	1.13071	4.11205
92	CCC1=CC=C(OCCCCS(=O)(O)=O)C=C1	O=C(C1=CC(C2=C(OC)C=CC=C2)=C(OC)C=C1)C(C=C3)=CC=C3OC4=CC=C(C(O)=O)C=C4	0.4	19.0202	281.502	4.62702	1.3513	4.11067
1578	O=C(C1=CC=C(OC2=CC(C3=CC(OC)=C(S(=O)(O)=O)C=C3)=C(O)C=C2)C=C1)C4=CC=CC=C4	O=S(C1=CC=CC=C1)(C2=CC=C(OC3=CC=C(C=C(O)C=C4)C4=C3)C=C2)=O	0.8	20.9233	321.043	5.0992	1.43761	4.10325
45	O=S(C1=CC=CC(S(=O)(O)=O)=C1)(C2=CC=C(OC3=CC=C(C4=CC=CC=C4)C=C3)C(S(=O)(O)=O)=C2)=O	O=C(C1=CC(C(C2=CC=CC=C2)=O)=CC=C1)C(C=C3)=CC=C3OC4=CC=C(O)C=C4	0.4	18.2451	310.236	4.46191	1.10965	4.08908
1563	O=C(C1=CC=C(OC2=CC(C3=CC(OC)=C(S(=O)(O)=O)C=C3)=C(O)C=C2)C=C1)C4=CC=CC=C4	O=S(C1=CC=CC=C1)(C2=CC=C(OC3=CC=C(O)C=C3)C=C2)=O	0.8	20.8788	327.649	5.10963	1.45008	4.08616
72	O=S(C1=C(OC2=CC=C(C3=NC4=C(C=C(N=CS5)C5=C4)S3)C=C2S(=O)(O)=O)C=CC=C1)(O)=O	O=C(C1=CC(C2=C(OC)C=CC=C2)=C(OC)C=C1)C(C=C3)=CC=C3OC4=CC=C(C(O)=O)C=C4	0.4	18.0734	306.971	4.42669	1.3784	4.08281
24	O=S(C1=CC=CC(S(=O)(O)=O)=C1)(C2=CC=C(OC3=CC=C(O)C=C3)C(S(=O)(O)=O)=C2)=O	O=C(C1=CC(C(C2=CC=CC=C2)=O)=CC=C1)C(C=C3)=CC=C3OC4=CC=C(O)C=C4	0.3	18.0226	321.84	4.41473	1.07739	4.08238
1535	O=C(C1=CC=C(OC2=CC(C3=CC(OC)=C(S(=O)(O)=O)C=C3)=C(O)C=C2)C=C1)C4=CC=CC=C4	O=S(C1=CC=CC=C1)(C2=CC=C(OC3=CC=C(C=CC(O)=C4)C4=C3)C=C2)=O	0.8	21.0649	320.422	5.16097	1.43747	4.08158
1571	O=C(C1=CC=C(OC2=CC(C3=CC(OC)=C(S(=O)(O)=O)C=C3)=C(O)C=C2)C=C1)C4=CC=CC=C4	OC1=CC=C(S(=O)(C2=CC=C(OC3=CC=C(S(C4=CC=CC=C4)(=O)=O)C=C3)C=C2)=O)C=C1	0.8	21.4737	324.701	5.26676	1.41101	4.07722
1012	OC1=CC=CC(OC2=CC=C(C=CC=C3)C3=C2)=C1C(C4=C(S(=O)(O)=O)C=CC=C4)=O	O=CC1=CC=C(OC2=CC=C(C3=NC4=C(C=C(C5=CC(N=CN6)=C6C=C5)C=C4)N3)C=C2)C=C1	0.7	17.7679	276.713	4.35909	1.23524	4.07606
1575	O=C(C1=CC=C(OC2=CC(C3=CC(OC)=C(S(=O)(O)=O)C=C3)=C(O)C=C2)C=C1)C4=CC=CC=C4	OC1=CC=C(C(C(C=C2)=CC=C2OC(C=C3)=CC=C3C(CCC(O)=O)(C)C4=CC=CC=C4)=O)C=C1	0.8	21.081	317.32	5.19746	1.4638	4.05601
1562	O=C(C1=CC=C(OC2=CC(C3=CC(OC)=C(S(=O)(O)=O)C=C3)=C(O)C=C2)C=C1)C4=CC=CC=C4	O=S(C1=CC=CC=C1)(C2=CC=C(OC3=CC=C(O)C(C4=CC=CC=C4)=C3)C=C2)=O	0.8	20.6903	325.319	5.10606	1.43284	4.05211
94	CCC1=CC=C(OCCCCS(=O)(O)=O)C=C1	O=C(C1=CC(C(C2=CC=CC=C2)=O)=CC=C1)C(C=C3)=CC=C3OC4=CC=C(O)C=C4	0.4	19.7051	322.781	4.87037	1.20022	4.04592
1531	O=C(C1=CC=C(OC2=CC(C3=CC(OC)=C(S(=O)(O)=O)C=C3)=C(O)C=C2)C=C1)C4=CC=CC=C4	OC1=CC=C(C(C(F)(F)F)(C(F)(F)F)C2=CC=C(OC3=CC=C(S(C4=CC=CC=C4)(=O)=O)C=C3)C=C2)C=C1	0.8	20.2353	320.065	5.00346	1.43355	4.04426
1564	O=C(C1=CC=C(OC2=CC(C3=CC(OC)=C(S(=O)(O)=O)C=C3)=C(O)C=C2)C=C1)C4=CC=CC=C4	O=S(C1=CC=CC=C1)(C2=CC=C(OC3=CC=C(O)C(C4=CC=C(F)C=C4)=C3)C=C2)=O	0.8	20.4321	326.313	5.05655	1.43492	4.04072
472	C=C(C1=CC(S(=O)(O)=O)=CC=C1)C2=CC=CC=C2	SC1=CC(C=C2)=C(C=C1)C=C2SC3=C(C#N)C=CC=C3	0.6	18.4221	279.521	4.56137	1.32296	4.03873
223	O=C(C1=CC(S(=O)(O)=O)=CC=C1)C2=CC=CC=C2	SC1=CC=C(SC2=CC=C(SC3=CC=C(S(C4=CC=CC=C4)(=O)=O)C=C3)C=C2)C=C1	0.5	18.4331	308.882	4.5709	1.16049	4.03271
21	O=S(C1=CC(C2=NC3=C(C=C(N=CS4)C4=C3)S2)=CC5=C(S(=O)(O)=O)C=CC=C51)(O)=O	O=C(C1=CC(C2=C(OC)C=CC=C2)=C(OC)C=C1)C(C=C3)=CC=C3OC4=CC=C(C(O)=O)C=C4	0.3	18.0061	299.549	4.46629	1.28462	4.03156
1516	O=C(C1=CC=C(OC2=CC(C3=CC(OC)=C(S(=O)(O)=O)C=C3)=C(O)C=C2)C=C1)C4=CC=CC=C4	O=S(C1=CC=C(O)C=C1)(C2=CC=C(OC3=CC=C(C(C(F)(F)F)(C(F)(F)F)C4=CC=CC=C4)C=C3)C=C2)=O	0.8	20.0475	321.041	4.98769	1.42683	4.0194
1536	O=C(C1=CC=C(OC2=CC(C3=CC(OC)=C(S(=O)(O)=O)C=C3)=C(O)C=C2)C=C1)C4=CC=CC=C4	OC1=CC=C(OC2=CC=C(OC3=CC=C(S(C4=CC=CC=C4)(=O)=O)C=C3)C=C2)C=C1	0.8	19.2267	332.186	4.78404	1.47445	4.01893
450	O=C(C1=CC(S(=O)(O)=O)=CC=C1)C2=CC=CC=C2	OC1=CC=C(C(C(C=C2)=CC=C2OC(C=C3)=CC=C3C(CCC(O)=O)(C)C4=CC=CC=C4)=O)C=C1	0.6	20.7122	283.726	5.157	1.25768	4.01632
473	C=C(C1=CC(S(=O)(O)=O)=CC=C1)C2=CC=CC=C2	SC(C=C1)=CC=C1SC(C=C2)=CC=C2SC3=C(C#N)C=CC=C3	0.6	18.4378	284.514	4.59211	1.19866	4.0151
1040	OC1=CC=CC(OC2=CC=C(C=CC=C3)C3=C2)=C1C(C4=C(S(=O)(O)=O)C=CC=C4)=O	O=C(C1=CC=CC=C1)C2=CC=C(C(C3=CC=CC=C3)=O)C=C2	0.7	19.2686	306.12	4.81104	1.01578	4.00507
1822	OC1=CC=CC(OC2=CC=C(C=CC=C3)C3=C2)=C1C(C4=C(S(=O)(O)=O)C=CC=C4)=O	SC(C=C1)=CC=C1SC(C=C2)=CC=C2SC3=C(C#N)C=CC=C3	0.8	18.6595	328.917	4.66136	1.11727	4.00302
1558	O=C(C1=CC=C(OC2=CC(C3=CC(OC)=C(S(=O)(O)=O)C=C3)=C(O)C=C2)C=C1)C4=CC=CC=C4	OC1=CC=CC(OC2=CC=C(C=CC=C3)C3=C2)=C1C#N	0.8	20.8064	310.782	5.2017	1.41642	3.99992
435	O=C(C1=CC(S(=O)(O)=O)=CC=C1)C2=CC=CC=C2	O=C(C1=CC=C(OC2=CC=C(C(C3=CC=CC=C3C(O)=O)C4=CC=C(O)C=C4)C=C2)C=C1)C5=CC=CC=C5	0.6	18.3776	284.065	4.60039	1.2796	3.99479
1032	OC1=CC=CC(OC2=CC=C(C=CC=C3)C3=C2)=C1C(C4=C(S(=O)(O)=O)C=CC=C4)=O	O=P(C1=CC=C(OC2=CC=C(O)C=C2)C=C1)(C3=CC=CC=C3)C4=CC=CC=C4	0.7	18.795	320.864	4.7065	1.09141	3.99341
442	O=C(C1=CC(S(=O)(O)=O)=CC=C1)C2=CC=CC=C2	O=S(C1=CC=C(O)C=C1)(C2=CC=C(OC3=CC=C(C=CC=C4)C4=C3)C=C2)=O	0.6	20.232	269.259	5.06778	1.14777	3.99228
1537	O=C(C1=CC=C(OC2=CC(C3=CC(OC)=C(S(=O)(O)=O)C=C3)=C(O)C=C2)C=C1)C4=CC=CC=C4	O=C(C1=CC=C(C(C2=CC=C(OC3=CC=C(O)C(C(C)(C)C)=C3)C=C2)=O)C=C1)C4=CC=CC=C4	0.8	20.3298	322.433	5.10755	1.46878	3.98034
1552	O=C(C1=CC=C(OC2=CC(C3=CC(OC)=C(S(=O)(O)=O)C=C3)=C(O)C=C2)C=C1)C4=CC=CC=C4	O=C(C1=CC=C(CCC)C=C1)C2=CC=CC=C2	0.8	20.7846	311.932	5.22271	1.4225	3.97965
1641	O=C(C1=CC=C(OC2=CC=C(S(=O)(O)=O)C=C2)C=C1)C3=CC=CC=C3	CCC1=CC=C(OCCCC)C=C1	0.8	21.0515	277.048	5.2898	1.18702	3.97965
428	O=C(C1=CC(S(=O)(O)=O)=CC=C1)C2=CC=CC=C2	O=C(C1=CC=C(OC2=CC=C(P(C3=CC=C(O)C=C3)(C4=CC=CC=C4)=O)C=C2)C=C1)C5=CC=CC=C5	0.6	18.6947	286.793	4.70809	1.17427	3.97075
1039	OC1=CC=CC(OC2=CC=C(C=CC=C3)C3=C2)=C1C(C4=C(S(=O)(O)=O)C=CC=C4)=O	O=C(C1=CC=CC(C=O)=C1)NC(C=C2)=CC=C2OC3=C(C#N)C(OC4=CC=C(N)C=C4)=CC=C3	0.7	19.6581	275.863	4.96243	1.26136	3.9614
1543	O=C(C1=CC=C(OC2=CC(C3=CC(OC)=C(S(=O)(O)=O)C=C3)=C(O)C=C2)C=C1)C4=CC=CC=C4	O=S(C1=CC=CC=C1)(C2=CC=C(OC3=CC=C(O)C(C(C)(C)C)=C3)C=C2)=O	0.8	20.4309	322.411	5.16405	1.44557	3.95637
1592	O=C(C1=CC=C(OC2=CC(C3=CC(OC)=C(S(=O)(O)=O)C=C3)=C(O)C=C2)C=C1)C4=CC=CC=C4	N=P(OC1=CC=C(F)C=C1)OC2=CC=C(OC)C=C2	0.8	19.6231	321.409	4.9606	1.52909	3.95579
720	O=S(C1=C(OC2=CC=C(C3=NC4=C(C=C(N=CS5)C5=C4)S3)C=C2S(=O)(O)=O)C=CC=C1)(O)=O	O=C(C1=CC=CC=C1)C2=CC=C(C(C3=CC=CC=C3)=O)C=C2	0.7	18.4298	328.22	4.65904	1.18478	3.9557
1590	O=C(C1=CC=C(OC2=CC(C3=CC(OC)=C(S(=O)(O)=O)C=C3)=C(O)C=C2)C=C1)C4=CC=CC=C4	OC1=CC=C(C2=CC=C(C3=CC=CC=C3C#N)C=C2)C=C1	0.8	20.3477	316.965	5.15525	1.49557	3.94698
28	O=S(C1=CC=CC(C2=CC=CC(S(=O)(O)=O)=C2)=C1)(O)=O	O=C(C1=CC=C(C=C1)F)C2=CC=C(C=C2)OC3=CC=C(C=C3)C(C)(C4=CC=C(C=C4)O)C	0.3	18.6022	316.71	4.71501	1.26901	3.94532
1529	O=C(C1=CC=C(OC2=CC(C3=CC(OC)=C(S(=O)(O)=O)C=C3)=C(O)C=C2)C=C1)C4=CC=CC=C4	O=S(C(C=C1)=CC=C1C2=NC3=CC=C(C4=CC=C(NC=N5)C5=C4)C=C3N2)(C6=CC=CC=C6)=O	0.8	19.2768	273.524	4.88701	1.34216	3.94449
516	O=C(C1=CC=C(OC2=CC=C(S(=O)(O)=O)C=C2)C=C1)C3=CC=CC=C3	OC(C=C1)=CC=C1C(C=C2)=CC=C2OC3=C(C#N)C=CC=C3	0.6	18.1964	307.177	4.62743	1.26295	3.93229
2807	O=C(C1=CC=C(OC2=CC(C3=CC(OC)=C(S(=O)(O)=O)C=C3)=C(O)C=C2)C=C1)C4=CC=CC=C4	O=P(C1=CC=C(SC2=CC=C(SC3=CC=C(S)C=C3)C=C2)C=C1)(C4=CC=CC=C4)C5=CC=CC=C5	0.9	21.3417	329.653	5.43233	1.42981	3.92864
484	CCC1=CC=C(OCCCCS(=O)(O)=O)C=C1	O=C(C1=CC(C(C2=CC=CC=C2)=O)=CC=C1)C(C=C3)=CC=C3OC4=CC=C(O)C=C4	0.6	19.7103	304.889	5.01739	1.18377	3.9284
1949	OC1=CC(C=C(S(=O)(O)=O)C=C2)=C2C=C1OC3=CC=CC=C3C#N	O=C(NC1=O)C2=C(C1=CC=C3)C3=C(C4=C(C=CC=C5C(N(C6=CC=C(N(C7=CC=CC=C7)C8=CC=CC=C8)C=C6)C9=O)=O)C5=C9C=C4)C=C2	0.8	17.551	278.227	4.47282	1.16074	3.92391
217	O=C(C1=CC(S(=O)(O)=O)=CC=C1)C2=CC=CC=C2	O=C(C1=CC=C(C=C1)F)C2=CC=C(C=C2)OC3=CC=C(C=C3)C(C)(C4=CC=C(C=C4)O)C	0.5	19.4255	284.844	4.95875	1.26161	3.91742
81	O=C(C1=CC(S(=O)(O)=O)=CC=C1)C2=CC=CC=C2	O=C(C1=CC=C(C=C1)F)C2=CC=C(C=C2)OC3=CC=C(C=C3)C(C)(C4=CC=C(C=C4)O)C	0.4	18.0148	313.203	4.60206	1.2684	3.9145
829	O=C(C1=CC(S(=O)(O)=O)=CC=C1)C2=CC=CC=C2	FC1=C(O)C(F)=C(F)C(C2=C(F)C(F)=C(OC3=CC=C(C4=CC=C(O)C=C4)C=C3)C(F)=C2F)=C1F	0.7	19.1497	285.381	4.89755	1.28536	3.91006
1690	O=C(C1=CC=C(OC2=CC=C(S(=O)(O)=O)C=C2)C=C1)C3=CC=CC=C3	N=P(OC1=CC=C(F)C=C1)OC2=CC=C(OC)C=C2	0.8	21.244	295.518	5.43617	1.20176	3.90791
986	O=C(C1=CC=C(OC2=CC=C(S(=O)(O)=O)C=C2)C=C1)C3=CC=CC=C3	SC(C=C1)=CC=C1SC(C=C2)=CC=C2SC3=C(C#N)C=CC=C3	0.7	17.7883	282.268	4.55243	1.11576	3.90743
721	O=S(C1=C(OC2=CC=C(C3=NC4=C(C=C(N=CS5)C5=C4)S3)C=C2S(=O)(O)=O)C=CC=C1)(O)=O	OC1=CC=C(C(C2=CC=C(OC3=CC=C(C(C4=CC=CC=C4)=O)C=C3)C=C2)=O)C=C1	0.7	19.0928	347.443	4.89386	1.29694	3.90138
1538	O=C(C1=CC=C(OC2=CC(C3=CC(OC)=C(S(=O)(O)=O)C=C3)=C(O)C=C2)C=C1)C4=CC=CC=C4	O=C1N(C2=CC=CC=C2C(F)(F)F)C(C3=CC=CC4=C3C1=CC=C4)=O	0.8	19.5833	293.258	5.02123	1.41278	3.9001
31	O=S(C1=CC=CC(C2=CC=CC(S(=O)(O)=O)=C2)=C1)(O)=O	SC1=CC=C(SC2=CC=C(SC3=CC=C(S(C4=CC=CC=C4)(=O)=O)C=C3)C=C2)C=C1	0.3	18.3592	351.325	4.72365	1.07813	3.88665
1827	OC1=CC=CC(OC2=CC=C(C=CC=C3)C3=C2)=C1C(C4=C(S(=O)(O)=O)C=CC=C4)=O	N#CC1=C(C2=CC=C(OC3=CC=CC=C3)C=C2)C=CC=C1	0.8	20.2782	302.259	5.22205	1.1487	3.88319
943	O=C(C1=CC=C(OC2=CC=C(S(=O)(O)=O)C=C2)C=C1)C3=CC=CC=C3	O=S(C1=C(C2=NC3=C(C=C(N=CS4)C4=C3)S2)C=CC=C1)(C5=CC=CC=C5)=O	0.7	18.7496	277.351	4.83072	1.09516	3.88133
1532	O=C(C1=CC=C(OC2=CC(C3=CC(OC)=C(S(=O)(O)=O)C=C3)=C(O)C=C2)C=C1)C4=CC=CC=C4	O=C(C1=CC=C(OC2=CC=C(P(C3=CC=C(O)C=C3)(C4=CC=CC=C4)=O)C=C2)C=C1)C5=CC=CC=C5	0.8	18.5122	325.241	4.77539	1.45236	3.87657
1582	O=C(C1=CC=C(OC2=CC(C3=CC(OC)=C(S(=O)(O)=O)C=C3)=C(O)C=C2)C=C1)C4=CC=CC=C4	O=C(C1=CC=CC=C1)C2=CC=CC=C2	0.8	19.6061	313.066	5.05788	1.43403	3.87634
257	O=C(C1=CC=C(OC2=CC=C(S(=O)(O)=O)C=C2)C=C1)C3=CC=CC=C3	O=S(C1=CC=C(O)C=C1)(C2=CC=C(OC3=CC=C(C(C4=CC=CC=C4)=O)C=C3)C=C2)=O	0.5	17.7944	319.285	4.59202	1.08822	3.87508
1541	O=C(C1=CC=C(OC2=CC(C3=CC(OC)=C(S(=O)(O)=O)C=C3)=C(O)C=C2)C=C1)C4=CC=CC=C4	CC(C1=CC=CC=C1)(C(F)(F)F)C2=CC=C(C3=NC4=C(C=C(N=CS5)C5=C4)S3)C=C2	0.8	19.6763	310.293	5.08221	1.414	3.8716
639	OC1=CC(C=C(S(=O)(O)=O)C=C2)=C2C=C1OC3=CC=CC=C3C#N	O=C(C1=CC=CC(C=O)=C1)NC(C=C2)=CC=C2OC3=C(C#N)C(OC4=CC=C(N)C=C4)=CC=C3	0.6	17.7336	280.852	4.58916	1.33939	3.86424
1567	O=C(C1=CC=C(OC2=CC(C3=CC(OC)=C(S(=O)(O)=O)C=C3)=C(O)C=C2)C=C1)C4=CC=CC=C4	O=C(C1=CC=CC=C1)C2=CC=C(C(C3=CC=CC=C3)=O)C=C2	0.8	19.2199	309.644	4.97979	1.3863	3.85958
1540	O=C(C1=CC=C(OC2=CC(C3=CC(OC)=C(S(=O)(O)=O)C=C3)=C(O)C=C2)C=C1)C4=CC=CC=C4	O=S(C1=C(C2=NC3=C(C=C(N=CS4)C4=C3)S2)C=CC=C1)(C5=CC=CC=C5)=O	0.8	19.1921	296.556	4.97421	1.4071	3.85832
451	O=C(C1=CC(S(=O)(O)=O)=CC=C1)C2=CC=CC=C2	OC1=CC=C(S(C2=CC=C(OC3=CC=C(C4=CC=CC=C4)C=C3)C=C2)(=O)=O)C=C1	0.6	19.8525	278.56	5.14983	1.18973	3.85499
1026	OC1=CC=CC(OC2=CC=C(C=CC=C3)C3=C2)=C1C(C4=C(S(=O)(O)=O)C=CC=C4)=O	O=C(C1=CC(C2=C(OC)C=CC=C2)=C(OC)C=C1)C(C=C3)=CC=C3OC4=CC=C(C(O)=O)C=C4	0.7	20.1723	305.584	5.23372	1.31481	3.85429
135	O=S(C1=CC=CC(C2=CC=CC(S(=O)(O)=O)=C2)=C1)(O)=O	O=C(C1=CC(C(C2=CC=CC=C2)=O)=CC=C1)C(C=C3)=CC=C3OC4=CC=C(C5=CC=C(O)C=C5)C=C4	0.4	17.9765	307.414	4.66477	1.14195	3.85367
900	O=C(C1=CC=C(OC2=CC(C3=CC(OC)=C(S(=O)(O)=O)C=C3)=C(O)C=C2)C=C1)C4=CC=CC=C4	O=S(C1=CC=C(S(=O)(O)=O)C=C1)(O)=O	0.7	18.8198	300.654	4.88741	1.14885	3.85067
1519	O=C(C1=CC=C(OC2=CC(C3=CC(OC)=C(S(=O)(O)=O)C=C3)=C(O)C=C2)C=C1)C4=CC=CC=C4	O=C(C1=CC=C(F)C=C1)C(C=C2)=CC=C2OC(C=C3)=CC=C3C(C(F)(F)F)(C(F)(F)F)C4=CC=CC=C4	0.8	18.7208	314.566	4.86819	1.4883	3.84553
723	O=S(C1=C(OC2=CC=C(C3=NC4=C(C=C(N=CS5)C5=C4)S3)C=C2S(=O)(O)=O)C=CC=C1)(O)=O	O=C(C1=CC(C(C2=CC=CC=C2)=O)=CC=C1)C(C=C3)=CC=C3OC4=CC=C(C5=CC=C(O)C=C5)C=C4	0.7	17.6762	350.46	4.59852	1.29592	3.84389
246	C=C(C1=CC(S(=O)(O)=O)=CC=C1)C2=CC=CC=C2	SC(C=C1)=CC=C1SC(C=C2)=CC=C2SC3=C(C#N)C=CC=C3	0.5	18.3044	284.431	4.76783	1.18527	3.83915
250	CCC1=CC=C(OCCCCS(=O)(O)=O)C=C1	O=C(C1=CC(C(C2=CC=CC=C2)=O)=CC=C1)C(C=C3)=CC=C3OC4=CC=C(O)C=C4	0.5	19.6285	320.351	5.11318	1.18571	3.8388
1043	OC1=CC=CC(OC2=CC=C(C=CC=C3)C3=C2)=C1C(C4=C(S(=O)(O)=O)C=CC=C4)=O	OC1=CC=C(C(C2=CC=C(OC3=CC=C(C(C4=CC=CC=C4)=O)C=C3)C=C2)=O)C=C1	0.7	19.201	315.463	5.00843	1.11619	3.83373
980	O=C(C1=CC=C(OC2=CC=C(S(=O)(O)=O)C=C2)C=C1)C3=CC=CC=C3	OC1=CC=C(C2=CC=C(C3=CC=CC=C3C#N)C=C2)C=C1	0.7	19.265	284.103	5.02699	1.21943	3.8323
3071	O=C(C1=CC=C(OC2=CC=C(S(=O)(O)=O)C=C2)C=C1)C3=CC=CC=C3	OC1=CC=C(C2=CC=C(C3=CC=CC=C3C#N)C=C2)C=C1	0.9	23.6637	293.996	6.18478	1.12395	3.82612
388	O=S(C1=C(OC2=CC=C(C3=NC4=C(C=C(N=CS5)C5=C4)S3)C=C2S(=O)(O)=O)C=CC=C1)(O)=O	O=C(C1=CC=C(C2=CC=C(OC3=CC=CC=C3)C=C2)C=C1)C4=CC=CC=C4	0.6	18.0001	371.807	4.71072	1.18506	3.8211
1533	O=C(C1=CC=C(OC2=CC(C3=CC(OC)=C(S(=O)(O)=O)C=C3)=C(O)C=C2)C=C1)C4=CC=CC=C4	OC1=C(OC2=CC=C(C(C3=CC(C(C4=CC=CC=C4)=O)=CC=C3)=O)C=C2)C=C5C(C6C=CC5C6)=C1	0.8	19.3588	318.75	5.06848	1.44957	3.81944
245	C=C(C1=CC(S(=O)(O)=O)=CC=C1)C2=CC=CC=C2	SC1=CC(C=C2)=C(C=C1)C=C2SC3=C(C#N)C=CC=C3	0.5	18.2559	281.062	4.78374	1.32062	3.81624
471	C=C(C1=CC(S(=O)(O)=O)=CC=C1)C2=CC=CC=C2	O=C(C1=CC(C(C2=CC=CC=C2)=O)=CC=C1)C(C=C3)=CC=C3OC4=CC=C(O)C=C4	0.6	21.0602	266.748	5.52573	1.23372	3.8113
129	O=S(C1=CC=CC(C2=CC=CC(S(=O)(O)=O)=C2)=C1)(O)=O	SC1=CC=C(SC2=CC=C(SC3=CC=C(S(C4=CC=CC=C4)(=O)=O)C=C3)C=C2)C=C1	0.4	18.0122	342.07	4.72674	1.08448	3.81069
318	OC1=CC(C=C(S(=O)(O)=O)C=C2)=C2C=C1OC3=CC=CC=C3C#N	O=C(C1=CC=CC=C1)C2=CC=C(C(C3=CC=CC=C3)=O)C=C2	0.5	17.6344	267.669	4.62776	1.20315	3.81057
1028	OC1=CC=CC(OC2=CC=C(C=CC=C3)C3=C2)=C1C(C4=C(S(=O)(O)=O)C=CC=C4)=O	O=C(NC1=O)C2=CC=C3C4=C2C1=CC=C4C(N(C5=CC=C(OC6=CC=CC=C6)C=C5)C3=O)=O	0.7	18.3631	283.528	4.82254	1.13329	3.80778
6	O=S(C1=CC=CC(C2=CC=CC(S(=O)(O)=O)=C2)=C1)(O)=O	O=C(C1=CC(C2=C(OC)C=CC=C2)=C(OC)C=C1)C(C=C3)=CC=C3OC4=CC=C(C(O)=O)C=C4	0.2	18.0561	273.026	4.74235	1.40748	3.80741
3024	O=C(C1=CC=C(OC2=CC=C(S(=O)(O)=O)C=C2)C=C1)C3=CC=CC=C3	SC1=CC=C(SC2=CC=C(SC3=CC=C(S(C4=CC=CC=C4)(=O)=O)C=C3)C=C2)C=C1	0.9	24.0773	292.703	6.32426	1.07813	3.80713
1518	O=C(C1=CC=C(OC2=CC(C3=CC(OC)=C(S(=O)(O)=O)C=C3)=C(O)C=C2)C=C1)C4=CC=CC=C4	FC1=C(O)C(F)=C(F)C(C2=C(F)C(F)=C(OC3=CC=C(C4=CC=C(O)C=C4)C=C3)C(F)=C2F)=C1F	0.8	19.885	318.056	5.22491	1.59378	3.80581
828	O=C(C1=CC(S(=O)(O)=O)=CC=C1)C2=CC=CC=C2	O=P(C1=CC=C(SC2=CC=C(SC3=CC=C(S)C=C3)C=C2)C=C1)(C4=CC=CC=C4)C5=CC=CC=C5	0.7	17.7705	275.991	4.67091	1.15394	3.80451
381	O=S(C1=C(OC2=CC=C(C3=NC4=C(C=C(N=CS5)C5=C4)S3)C=C2S(=O)(O)=O)C=CC=C1)(O)=O	O=C(C1=CC(C2=C(OC)C=CC=C2)=C(OC)C=C1)C(C=C3)=CC=C3OC4=CC=C(C(O)=O)C=C4	0.6	18.3309	323.187	4.83116	1.33885	3.7943
1588	O=C(C1=CC=C(OC2=CC(C3=CC(OC)=C(S(=O)(O)=O)C=C3)=C(O)C=C2)C=C1)C4=CC=CC=C4	O=C(C1=CC(C(C2=CC=CC=C2)=O)=CC=C1)C(C=C3)=CC=C3OC4=CC=C(C5=CC=C(O)C=C5)C=C4	0.8	18.6602	321.385	4.92921	1.47495	3.78564
3063	O=C(C1=CC=C(OC2=CC=C(S(=O)(O)=O)C=C2)C=C1)C3=CC=CC=C3	O=C(C1=CC=CC=C1)C2=CC=CC=C2	0.9	24.401	275.099	6.45041	1.08636	3.78286
681	OC1=CC(S(=O)(O)=O)=C(OC2=CC=CC=C2C#N)C=C1	O=C(C1=CC(C(C2=CC=CC=C2)=O)=CC=C1)C(C=C3)=CC=C3OC4=CC=C(O)C=C4	0.6	19.1311	292.198	5.05986	1.44311	3.78094
43	O=S(C1=CC=CC(S(=O)(O)=O)=C1)(C2=CC=C(OC3=CC=C(C4=CC=CC=C4)C=C3)C(S(=O)(O)=O)=C2)=O	O=C(C1=CC(C2=C(OC)C=CC=C2)=C(OC)C=C1)C(C=C3)=CC=C3OC4=CC=C(C(O)=O)C=C4	0.4	17.7907	289.938	4.70681	1.21764	3.77977
346	O=S(C1=CC=CC(S(=O)(O)=O)=C1)(C2=CC=C(OC3=CC=C(C4=CC=CC=C4)C=C3)C(S(=O)(O)=O)=C2)=O	OC(C=C1)=CC=C1P(C(C=C2)=CC=C2OC(C=C3)=CC=C3C(C4=CC=CC(C(C5=CC=CC=C5)=O)=C4)=O)(C6=CC=CC=C6)=O	0.6	18.5837	332.139	4.91745	1.00316	3.77913
1016	OC1=CC=CC(OC2=CC=C(C=CC=C3)C3=C2)=C1C(C4=C(S(=O)(O)=O)C=CC=C4)=O	OC1=CC=C(OC2=CC=C(OC3=CC=C(S(C4=CC=CC=C4)(=O)=O)C=C3)C=C2)C=C1	0.7	18.6037	312.307	4.92281	1.19115	3.77909
3049	O=C(C1=CC=C(OC2=CC=C(S(=O)(O)=O)C=C2)C=C1)C3=CC=CC=C3	O=C(C1=CC=CC=C1)C2=CC=C(C(C3=CC=CC=C3)=O)C=C2	0.9	24.2867	269.737	6.44748	1.0803	3.76685
1568	O=C(C1=CC=C(OC2=CC(C3=CC(OC)=C(S(=O)(O)=O)C=C3)=C(O)C=C2)C=C1)C4=CC=CC=C4	OC(C=C1)=CC=C1C2(C3=CC=C(OC4=CC=CC=C4C#N)C=C3)C5=C(C=CC=C5)C6=CC=CC=C26	0.8	19.4589	315.611	5.16585	1.58259	3.76684
2861	O=C(C1=CC=C(OC2=CC(C3=CC(OC)=C(S(=O)(O)=O)C=C3)=C(O)C=C2)C=C1)C4=CC=CC=C4	CCC1=CC=C(OCCCC)C=C1	0.9	21.6114	315.811	5.73837	1.50127	3.76612
1595	O=C(C1=CC=C(OC2=CC(C3=CC(OC)=C(S(=O)(O)=O)C=C3)=C(O)C=C2)C=C1)C4=CC=CC=C4	O=CC1=CC=CC(C(NC2=CC=CC(C(C(F)(F)F)(C(F)(F)F)C3=CC=C(N)C=C3)=C2)=O)=C1	0.8	20.4238	305.564	5.43341	1.41049	3.75892
3046	O=C(C1=CC=C(OC2=CC=C(S(=O)(O)=O)C=C2)C=C1)C3=CC=CC=C3	OC(C=C1)=CC=C1C(C=C2)=CC=C2OC3=C(C#N)C=CC=C3	0.9	23.408	309.453	6.22909	1.1281	3.75784
1734	OC1=CC=CC(OC2=CC=C(C=CC=C3)C3=C2)=C1C(C4=C(S(=O)(O)=O)C=CC=C4)=O	O=P(C1=CC=C(SC2=CC=C(SC3=CC=C(S)C=C3)C=C2)C=C1)(C4=CC=CC=C4)C5=CC=CC=C5	0.8	18.1116	349.569	4.83076	1.09105	3.74921
1014	OC1=CC=CC(OC2=CC=C(C=CC=C3)C3=C2)=C1C(C4=C(S(=O)(O)=O)C=CC=C4)=O	O=S(C1=CC=C(O)C=C1)(C2=CC=C(OC3=CC=C(C(C4=CC=CC=C4)=O)C=C3)C=C2)=O	0.7	19.2804	313.807	5.15392	1.13387	3.74091
852	CCC1=CC=C(OCCCCS(=O)(O)=O)C=C1	O=C(C1=CC(C(C2=CC=CC=C2)=O)=CC=C1)C(C=C3)=CC=C3OC4=CC=C(O)C=C4	0.7	19.0316	300.647	5.09412	1.17319	3.73599
1600	O=C(C1=CC=C(OC2=CC(C3=CC(OC)=C(S(=O)(O)=O)C=C3)=C(O)C=C2)C=C1)C4=CC=CC=C4	OC1=CC=C(C(C2=C(C(O)=O)C=CC=C2)C3=CC=C(OC4=CC=CC=C4C#N)C=C3)C=C1	0.8	19.4962	313.811	5.22262	1.58523	3.73303
480	CCC1=CC=C(OCCCCS(=O)(O)=O)C=C1	OC(C=C1)=CC=C1P(C(C=C2)=CC=C2OC(C=C3)=CC=C3C(C4=CC=CC(C(C5=CC=CC=C5)=O)=C4)=O)(C6=CC=CC=C6)=O	0.6	17.8148	310.052	4.77483	1.10607	3.73098
301	O=S(C1=CC=CC(C2=CC=CC(S(=O)(O)=O)=C2)=C1)(O)=O	O=C(C1=CC=C(C(C2=CC=C(OC3=CC=C(O)C(C(C)(C)C)=C3)C=C2)=O)C=C1)C4=CC=CC=C4	0.5	19.9454	278.156	5.35077	1.14481	3.72758
716	O=S(C1=C(OC2=CC=C(C3=NC4=C(C=C(N=CS5)C5=C4)S3)C=C2S(=O)(O)=O)C=CC=C1)(O)=O	O=C(C1=CC=C(OC2=C(C=CC=C3C(N(C4=CC=CC=C4C)C5=O)=O)C3=C5C=C2)C=C1)C6=CC=CC=C6	0.7	17.618	268.74	4.74436	1.27503	3.71346
1049	OC1=CC=CC(OC2=CC=C(C=CC=C3)C3=C2)=C1C(C4=C(S(=O)(O)=O)C=CC=C4)=O	O=C(C1=CC=CC=C1)C2=CC=CC=C2	0.7	19.5441	307.787	5.28105	1.02753	3.7008
89	C=C(C1=CC(S(=O)(O)=O)=CC=C1)C2=CC=CC=C2	O=C(C1=CC(C2=C(OC)C=CC=C2)=C(OC)C=C1)C(C=C3)=CC=C3OC4=CC=C(C(O)=O)C=C4	0.4	18.3384	266.49	4.96774	1.27595	3.6915
2822	O=C(C1=CC=C(OC2=CC(C3=CC(OC)=C(S(=O)(O)=O)C=C3)=C(O)C=C2)C=C1)C4=CC=CC=C4	C1(C2=NC3=CC=C(C4=CC=C(NC=N5)C5=C4)C=C3N2)=CC=CC6=C1C=CC=C6	0.9	21.3662	307.749	5.78978	1.35072	3.69034
3096	O=C(C1=CC=C(OC2=CC=C(S(=O)(O)=O)C=C2)C=C1)C3=CC=CC=C3	O=C(C1=CC=C(C2=CC=C(OC3=CC=CC=C3)C=C2)C=C1)C4=CC=CC=C4	0.9	23.7787	281.071	6.45187	1.08813	3.68555
378	O=S(C1=C(OC2=CC=C(C3=NC4=C(C=C(N=CS5)C5=C4)S3)C=C2S(=O)(O)=O)C=CC=C1)(O)=O	O=C(C1=CC=C(C(C2=CC=C(OC3=CC=C(O)C(C(C)(C)C)=C3)C=C2)=O)C=C1)C4=CC=CC=C4	0.6	19.038	315.119	5.166	1.3436	3.68526
1036	OC1=CC=CC(OC2=CC=C(C=CC=C3)C3=C2)=C1C(C4=C(S(=O)(O)=O)C=CC=C4)=O	O=S(C1=CC=CC=C1)(C2=CC=C(OC3=CC=C(O)C(C4=CC=C(F)C=C4)=C3)C=C2)=O	0.7	18.2177	315.182	4.94455	1.16671	3.6844
305	O=S(C1=CC=CC(C2=CC=CC(S(=O)(O)=O)=C2)=C1)(O)=O	O=C(C1=CC(C(C2=CC=CC=C2)=O)=CC=C1)C(C=C3)=CC=C3OC4=CC=C(C5=CC=C(O)C=C5)C=C4	0.5	18.156	289.785	4.93118	1.12711	3.68187
454	O=C(C1=CC(S(=O)(O)=O)=CC=C1)C2=CC=CC=C2	O=S(C1=CC=C(O)C=C1)(C2=CC=C(OC3=CC=CC=C3)C=C2)=O	0.6	19.8869	271.029	5.41286	1.23991	3.67402
3041	O=C(C1=CC=C(OC2=CC=C(S(=O)(O)=O)C=C2)C=C1)C3=CC=CC=C3	O=P(C1=CC=C(OC2=CC=C(O)C=C2)C=C1)(C3=CC=CC=C3)C4=CC=CC=C4	0.9	23.1379	313.256	6.30292	1.06748	3.67098
1520	O=C(C1=CC=C(OC2=CC(C3=CC(OC)=C(S(=O)(O)=O)C=C3)=C(O)C=C2)C=C1)C4=CC=CC=C4	CC(CCC(N1C=CN=N1)=O)(C2=CC=C(O)C=C2)C(C=C3)=CC=C3OC(C=C4)=CC=C4C(C5=CC=CC=C5)=O	0.8	17.8865	301.683	4.87562	1.45284	3.66856
1530	O=C(C1=CC=C(OC2=CC(C3=CC(OC)=C(S(=O)(O)=O)C=C3)=C(O)C=C2)C=C1)C4=CC=CC=C4	O=S(C1=CC=CC=C1C2=NC3=CC=C(C4=CC=C(N=CN5)C5=C4)C=C3N2)(C6=CC=CC=C6)=O	0.8	19.2633	273.816	5.25902	1.34175	3.66292
437	O=C(C1=CC(S(=O)(O)=O)=CC=C1)C2=CC=CC=C2	OC(C=C1)=CC=C1C(C)(C)C(C=C2)=CC=C2OC3=CC=C(C(C4=CC=CC=C4)=O)C=C3	0.6	20.4466	269.92	5.58773	1.31477	3.65919
59	O=S(C1=CC=CC=C1)(O)=O	SC1=CC=C(SC2=CC=C(SC3=CC=C(S(C4=CC=CC=C4)(=O)=O)C=C3)C=C2)C=C1	0.4	18.1634	303.312	4.96399	1.07704	3.65904
1037	OC1=CC=CC(OC2=CC=C(C=CC=C3)C3=C2)=C1C(C4=C(S(=O)(O)=O)C=CC=C4)=O	OC(C=C1)=CC=C1C(C=C2)=CC=C2OC3=C(C#N)C=CC=C3	0.7	18.7798	304.223	5.13638	1.22558	3.65624
2983	O=C(C1=CC=C(OC2=CC=C(S(=O)(O)=O)C=C2)C=C1)C3=CC=CC=C3	O=S(C1=CC=CC=C1C2=NC3=CC=C(C4=CC=C(N=CN5)C5=C4)C=C3N2)(C6=CC=CC=C6)=O	0.9	22.9009	279.233	6.26559	1.07883	3.65503
1061	OC1=CC=CC(OC2=CC=C(C=CC=C3)C3=C2)=C1C(C4=C(S(=O)(O)=O)C=CC=C4)=O	O=C(C1=CC=C(C2=CC=C(OC3=CC=CC=C3)C=C2)C=C1)C4=CC=CC=C4	0.7	19.4673	323.489	5.33982	1.11025	3.64568
1047	OC1=CC=CC(OC2=CC=C(C=CC=C3)C3=C2)=C1C(C4=C(S(=O)(O)=O)C=CC=C4)=O	O=S(C1=CC=CC=C1)(C2=CC=C(OC3=CC=C(C=C(O)C=C4)C4=C3)C=C2)=O	0.7	18.5999	307.974	5.11143	1.12351	3.63889
1688	O=C(C1=CC=C(OC2=CC=C(S(=O)(O)=O)C=C2)C=C1)C3=CC=CC=C3	OC1=CC=C(C2=CC=C(C3=CC=CC=C3C#N)C=C2)C=C1	0.8	21.5122	295.25	5.91861	1.15378	3.63468
1008	O=C(NC1=O)C2=CC=C3C4=C2C1=CC=C4C(N(C5=CC=C(OC6=CC(C=C(OC7=CC=CC=C7)C(S(=O)(O)=O)=C8)=C8C=C6S(=O)(O)=O)C=C5)C3=O)=O	N#CC1=C(C2=CC=C(OC3=CC=CC=C3)C=C2)C=CC=C1	0.7	19.7398	295.346	5.43351	1.08953	3.63297
1573	O=C(C1=CC=C(OC2=CC(C3=CC(OC)=C(S(=O)(O)=O)C=C3)=C(O)C=C2)C=C1)C4=CC=CC=C4	O=S(C1=CC=C(S(=O)(O)=O)C=C1)(O)=O	0.8	19.663	305.783	5.41343	1.28076	3.63227
1581	O=C(C1=CC=C(OC2=CC(C3=CC(OC)=C(S(=O)(O)=O)C=C3)=C(O)C=C2)C=C1)C4=CC=CC=C4	O=C(C1=C2C(C=CC=C23)=CC=C1)N(C4=CC=CC(C(C5=CC=CC=C5)=O)=C4)C3=O	0.8	18.6707	294.129	5.15187	1.38579	3.62407
190	O=S(C1=CC=CC=C1)(O)=O	SC1=CC=C(SC2=CC=C(SC3=CC=C(S(C4=CC=CC=C4)(=O)=O)C=C3)C=C2)C=C1	0.5	18.1482	295.111	5.0124	1.11698	3.62066
366	O=S(C1=CC=CC=C1)(O)=O	SC1=CC=C(SC2=CC=C(SC3=CC=C(S(C4=CC=CC=C4)(=O)=O)C=C3)C=C2)C=C1	0.6	17.7334	293.816	4.90217	1.19211	3.61745
379	O=S(C1=C(OC2=CC=C(C3=NC4=C(C=C(N=CS5)C5=C4)S3)C=C2S(=O)(O)=O)C=CC=C1)(O)=O	O=C1N(C2=CC=CC=C2C(F)(F)F)C(C3=CC=CC4=C3C1=CC=C4)=O	0.6	17.7029	266.785	4.89455	1.35071	3.61685
3057	O=C(C1=CC=C(OC2=CC=C(S(=O)(O)=O)C=C2)C=C1)C3=CC=CC=C3	O=S(C1=CC=C(S(=O)(O)=O)C=C1)(O)=O	0.9	24.1603	269.564	6.68068	1.06525	3.61644
160	O=S(C1=CC=CC(S(=O)(O)=O)=C1)(C2=CC(S(=O)(O)=O)=C(SC3=CC(C=CC(S)=C4)=C4C=C3)C=C2)=O	SC1=CC=C(SC2=CC=C(SC3=CC=C(S(C4=CC=CC=C4)(=O)=O)C=C3)C=C2)C=C1	0.4	18.2143	336.143	5.03739	1.06619	3.61581
2982	O=C(C1=CC=C(OC2=CC=C(S(=O)(O)=O)C=C2)C=C1)C3=CC=CC=C3	O=S(C(C=C1)=CC=C1C2=NC3=CC=C(C4=CC=C(NC=N5)C5=C4)C=C3N2)(C6=CC=CC=C6)=O	0.9	22.7055	280.12	6.27989	1.07863	3.61559
23	O=S(C1=CC=CC(S(=O)(O)=O)=C1)(C2=CC=C(OC3=CC=C(O)C=C3)C(S(=O)(O)=O)=C2)=O	OC1=CC=C(C(C2=CC=C(OC3=CC=C(C(C4=CC=CC=C4)=O)C=C3)C=C2)=O)C=C1	0.3	18.0388	324.259	4.99911	1.08144	3.60839
3073	O=C(C1=CC=C(OC2=CC=C(S(=O)(O)=O)C=C2)C=C1)C3=CC=CC=C3	N=P(OC1=CC=C(F)C=C1)OC2=CC=C(OC)C=C2	0.9	22.9658	291.744	6.36566	1.11379	3.60777
501	O=C(C1=CC=C(OC2=CC=C(S(=O)(O)=O)C=C2)C=C1)C3=CC=CC=C3	O=S(C(C=C1)=CC=C1OC(C=C2)=CC=C2C3=CC=C(O)C=C3)(C4=CC=CC=C4)=O	0.6	17.8927	338.828	4.96268	1.08136	3.60545
1015	OC1=CC=CC(OC2=CC=C(C=CC=C3)C3=C2)=C1C(C4=C(S(=O)(O)=O)C=CC=C4)=O	O=S(C1=CC=CC=C1)(C2=CC=C(OC3=CC=C(C=CC(O)=C4)C4=C3)C=C2)=O	0.7	18.5963	308.005	5.15888	1.12304	3.60472
2963	O=C(C1=CC=C(OC2=CC=C(S(=O)(O)=O)C=C2)C=C1)C3=CC=CC=C3	O=C(C1=CC=C(C=C1)F)C2=CC=C(C=C2)OC3=CC=C(C=C3)C(C)(C4=CC=C(C=C4)O)C	0.9	23.9003	313.586	6.64749	1.1391	3.59539
612	O=S(C1=CC=CC(C2=CC=CC(S(=O)(O)=O)=C2)=C1)(O)=O	OC(C=C1)=CC=C1P(C(C=C2)=CC=C2OC(C=C3)=CC=C3C(C4=CC=CC(C(C5=CC=CC=C5)=O)=C4)=O)(C6=CC=CC=C6)=O	0.6	17.9234	289.276	4.98727	1.14885	3.59383
70	O=S(C1=CC=CC=C1)(O)=O	SC(C=C1)=CC=C1SC(C=C2)=CC=C2SC3=C(C#N)C=CC=C3	0.4	18.0789	286.037	5.04383	1.30395	3.58435
3002	O=C(C1=CC=C(OC2=CC=C(S(=O)(O)=O)C=C2)C=C1)C3=CC=CC=C3	CC(C)(C1=CC=C(OC2=CC=C(S(C3=CC=CC=C3)(=O)=O)C=C2)C=C1)C4=CC=C(O)C=C4	0.9	23.4084	311.218	6.53451	1.13274	3.58227
3087	O=C(C1=CC=C(OC2=CC=C(S(=O)(O)=O)C=C2)C=C1)C3=CC=CC=C3	O=CC1=CC=CC(C(NC2=CC=CC(C(C(F)(F)F)(C(F)(F)F)C3=CC=C(N)C=C3)=C2)=O)=C1	0.9	23.857	281.392	6.66159	1.11698	3.58128
302	O=S(C1=CC=CC(C2=CC=CC(S(=O)(O)=O)=C2)=C1)(O)=O	SC1=CC=C(SC2=CC=C(SC3=CC=C(S(C4=CC=CC=C4)(=O)=O)C=C3)C=C2)C=C1	0.5	18.0748	314.001	5.04717	1.09881	3.58117
194	O=S(C1=CC=CC=C1)(O)=O	O=C(C1=CC(C(C2=CC=CC=C2)=O)=CC=C1)C(C=C3)=CC=C3OC4=CC=C(O)C=C4	0.5	20.9451	286.268	5.8508	1.26749	3.57987
138	O=S(C1=CC=CC(C2=CC=CC(S(=O)(O)=O)=C2)=C1)(O)=O	SC(C=C1)=CC=C1SC(C=C2)=CC=C2SC3=C(C#N)C=CC=C3	0.4	18.0759	301.918	5.05728	1.18945	3.57423
69	O=S(C1=CC=CC=C1)(O)=O	SC1=CC(C=C2)=C(C=C1)C=C2SC3=C(C#N)C=CC=C3	0.4	17.717	282.302	4.95805	1.3845	3.57337
1680	O=C(C1=CC=C(OC2=CC=C(S(=O)(O)=O)C=C2)C=C1)C3=CC=CC=C3	O=S(C1=CC=CC=C1)(C2=CC=C(OC3=CC=C(C=C(O)C=C4)C4=C3)C=C2)=O	0.8	21.755	311.953	6.0926	1.06773	3.57072
1667	O=C(C1=CC=C(OC2=CC=C(S(=O)(O)=O)C=C2)C=C1)C3=CC=CC=C3	OC(C=C1)=CC=C1C(C=C2)=CC=C2OC3=C(C#N)C=CC=C3	0.8	21.7408	309.771	6.09144	1.19741	3.56907
3048	O=C(C1=CC=C(OC2=CC=C(S(=O)(O)=O)C=C2)C=C1)C3=CC=CC=C3	O=C(C1=CC=CC(C=O)=C1)NC(C=C2)=CC=C2OC3=C(C#N)C(OC4=CC=C(N)C=C4)=CC=C3	0.9	22.6209	283.709	6.33987	1.08548	3.56804
678	OC1=CC(S(=O)(O)=O)=C(OC2=CC=CC=C2C#N)C=C1	O=C(C1=CC=CC(C=O)=C1)NC(C=C2)=CC=C2OC3=C(C#N)C(OC4=CC=C(N)C=C4)=CC=C3	0.6	17.734	268.153	4.97032	1.37725	3.56798
127	O=S(C1=CC=CC(C2=CC=CC(S(=O)(O)=O)=C2)=C1)(O)=O	O=C(C1=CC=C(C(C2=CC=C(OC3=CC=C(O)C(C(C)(C)C)=C3)C=C2)=O)C=C1)C4=CC=CC=C4	0.4	19.5189	292.485	5.47238	1.15603	3.56681
19	O=S(C1=CC=CC=C1)(O)=O	SC(C=C1)=CC=C1SC(C=C2)=CC=C2SC3=C(C#N)C=CC=C3	0.3	17.5381	289.478	4.92079	1.22635	3.56408
369	O=S(C1=CC=CC=C1)(O)=O	SC1=CC(C=C2)=C(C=C1)C=C2SC3=C(C#N)C=CC=C3	0.6	18.5809	274.656	5.2191	1.37564	3.56016
1664	O=C(C1=CC=C(OC2=CC=C(S(=O)(O)=O)C=C2)C=C1)C3=CC=CC=C3	O=S(C1=CC=CC=C1)(C2=CC=C(OC3=CC=C(O)C(C4=CC=CC=C4)=C3)C=C2)=O	0.8	21.3925	316.17	6.01074	1.07178	3.55904
483	CCC1=CC=C(OCCCCS(=O)(O)=O)C=C1	O=C(C1=CC(C(C2=CC=CC=C2)=O)=CC=C1)C(C=C3)=CC=C3OC4=CC=C(C5=CC=C(O)C=C5)C=C4	0.6	18.1329	321.014	5.09521	1.23235	3.55882
1051	OC1=CC=CC(OC2=CC=C(C=CC=C3)C3=C2)=C1C(C4=C(S(=O)(O)=O)C=CC=C4)=O	O=S(C1=CC=C(O)C=C1)(C2=CC=C(OC3=CC=CC=C3)C=C2)=O	0.7	18.5127	307.291	5.20574	1.16604	3.55621
1553	O=C(C1=CC=C(OC2=CC(C3=CC(OC)=C(S(=O)(O)=O)C=C3)=C(O)C=C2)C=C1)C4=CC=CC=C4	O=C(NC1=O)C2=CC=C3C4=C2C1=CC=C4C(N(C5=CC=C(OC6=CC=CC=C6)C=C5)C3=O)=O	0.8	19.1368	300.011	5.38869	1.42874	3.55128
3050	O=C(C1=CC=C(OC2=CC=C(S(=O)(O)=O)C=C2)C=C1)C3=CC=CC=C3	OC(C=C1)=CC=C1C2(C3=CC=C(OC4=CC=CC=C4C#N)C=C3)C5=C(C=CC=C5)C6=CC=CC=C26	0.9	22.3856	305.08	6.30392	1.15941	3.55106
139	O=S(C1=CC=CC(C2=CC=CC(S(=O)(O)=O)=C2)=C1)(O)=O	O=C(C1=CC=C(C2=CC=C(OC3=CC=CC=C3)C=C2)C=C1)C4=CC=CC=C4	0.4	18.0545	286.634	5.08779	1.22559	3.5486
85	O=C(C1=CC(S(=O)(O)=O)=CC=C1)C2=CC=CC=C2	O=C(C1=CC=C(C2=CC=C(OC3=CC=CC=C3)C=C2)C=C1)C4=CC=CC=C4	0.4	17.7999	289.3	5.018	1.25557	3.54722
3059	O=C(C1=CC=C(OC2=CC=C(S(=O)(O)=O)C=C2)C=C1)C3=CC=CC=C3	OC1=CC=C(S(C2=CC=C(OC3=CC=C(C4=CC=CC=C4)C=C3)C=C2)(=O)=O)C=C1	0.9	23.434	310.909	6.6093	1.07334	3.54561
1034	OC1=CC=CC(OC2=CC=C(C=CC=C3)C3=C2)=C1C(C4=C(S(=O)(O)=O)C=CC=C4)=O	O=S(C1=CC=CC=C1)(C2=CC=C(OC3=CC=C(O)C(C4=CC=CC=C4)=C3)C=C2)=O	0.7	18.6489	314.956	5.26062	1.17099	3.54501
3023	O=C(C1=CC=C(OC2=CC=C(S(=O)(O)=O)C=C2)C=C1)C3=CC=CC=C3	OC(C=C1)=CC=C1C(C)(C)C(C=C2)=CC=C2OC3=CC=C(C(C4=CC=CC=C4)=O)C=C3	0.9	23.9033	311.811	6.75899	1.12957	3.53652
3040	O=C(C1=CC=C(OC2=CC=C(S(=O)(O)=O)C=C2)C=C1)C3=CC=CC=C3	O=S(C1=CC=C(O)C=C1)(C2=CC=C(OC3=CC=C(C=CC=C4)C4=C3)C=C2)=O	0.9	23.4343	308.814	6.62893	1.06796	3.53516
3039	O=C(C1=CC=C(OC2=CC=C(S(=O)(O)=O)C=C2)C=C1)C3=CC=CC=C3	OC1=CC=CC(OC2=CC=C(C=CC=C3)C3=C2)=C1C#N	0.9	23.2591	307.561	6.58392	1.07382	3.53272
1010	OC1=CC=CC(OC2=CC=C(C=CC=C3)C3=C2)=C1C(C4=C(S(=O)(O)=O)C=CC=C4)=O	O=C(C1=CC=C(C=C1)F)C2=CC=C(C=C2)OC3=CC=C(C=C3)C(C)(C4=CC=C(C=C4)O)C	0.7	19.2713	323.061	5.4575	1.18045	3.53116
1662	O=C(C1=CC=C(OC2=CC=C(S(=O)(O)=O)C=C2)C=C1)C3=CC=CC=C3	O=P(C1=CC=C(OC2=CC=C(O)C=C2)C=C1)(C3=CC=CC=C3)C4=CC=CC=C4	0.8	21.104	314.855	5.9883	1.06274	3.5242
3044	O=C(C1=CC=C(OC2=CC=C(S(=O)(O)=O)C=C2)C=C1)C3=CC=CC=C3	O=S(C1=CC=CC=C1)(C2=CC=C(OC3=CC=C(O)C=C3)C=C2)=O	0.9	23.2126	311.237	6.59249	1.07574	3.52107
1665	O=C(C1=CC=C(OC2=CC=C(S(=O)(O)=O)C=C2)C=C1)C3=CC=CC=C3	O=S(C1=CC=CC=C1)(C2=CC=C(OC3=CC=C(O)C=C3)C=C2)=O	0.8	21.619	315.881	6.14552	1.08059	3.51785
200	O=S(C1=C(OC2=CC=C(C3=NC4=C(C=C(N=CS5)C5=C4)S3)C=C2S(=O)(O)=O)C=CC=C1)(O)=O	O=C(C1=CC=C(C(C2=CC=C(OC3=CC=C(O)C(C(C)(C)C)=C3)C=C2)=O)C=C1)C4=CC=CC=C4	0.5	18.355	317.775	5.21854	1.33	3.51726
1035	OC1=CC=CC(OC2=CC=C(C=CC=C3)C3=C2)=C1C(C4=C(S(=O)(O)=O)C=CC=C4)=O	O=S(C1=CC=CC=C1)(C2=CC=C(OC3=CC=C(O)C=C3)C=C2)=O	0.7	18.5475	309.164	5.27598	1.13501	3.51547
3052	O=C(C1=CC=C(OC2=CC=C(S(=O)(O)=O)C=C2)C=C1)C3=CC=CC=C3	O=S(C1=CC=C(OC2=CC=CC=C2C3=CC=C(F)C=C3)C=C1)(C4=CC=C(O)C=C4)=O	0.9	23.2918	311.53	6.62921	1.08222	3.51352
1011	OC1=CC=CC(OC2=CC=C(C=CC=C3)C3=C2)=C1C(C4=C(S(=O)(O)=O)C=CC=C4)=O	O=S(C(C=C1)=CC=C1OC(C=C2)=CC=C2C3=CC=C(O)C=C3)(C4=CC=CC=C4)=O	0.7	18.4651	310.768	5.25834	1.16718	3.51159
2943	O=C(C1=CC=C(OC2=CC(C3=CC(OC)=C(S(=O)(O)=O)C=C3)=C(O)C=C2)C=C1)C4=CC=CC=C4	SC(C=C1)=CC=C1SC(C=C2)=CC=C2SC3=C(C#N)C=CC=C3	0.9	21.8854	325.822	6.23368	1.43031	3.51082
448	O=C(C1=CC(S(=O)(O)=O)=CC=C1)C2=CC=CC=C2	O=S(C1=CC=C(OC2=CC=CC=C2C3=CC=C(F)C=C3)C=C1)(C4=CC=C(O)C=C4)=O	0.6	19.361	288.51	5.53031	1.20334	3.50088
3069	O=C(C1=CC=C(OC2=CC=C(S(=O)(O)=O)C=C2)C=C1)C3=CC=CC=C3	O=C(C1=CC(C(C2=CC=CC=C2)=O)=CC=C1)C(C=C3)=CC=C3OC4=CC=C(O)C=C4	0.9	22.9179	308.138	6.54943	1.07456	3.49922
1046	OC1=CC=CC(OC2=CC=C(C=CC=C3)C3=C2)=C1C(C4=C(S(=O)(O)=O)C=CC=C4)=O	OC1=CC=C(S(C2=CC=C(OC3=CC=C(C4=CC=CC=C4)C=C3)C=C2)(=O)=O)C=C1	0.7	18.6411	307.914	5.32761	1.16683	3.49897
3012	O=C(C1=CC=C(OC2=CC=C(S(=O)(O)=O)C=C2)C=C1)C3=CC=CC=C3	O=S(C1=CC=CC=C1)(C2=CC=C(OC3=CC=C(O)C(C(C)(C)C)=C3)C=C2)=O	0.9	23.4253	310.8	6.69571	1.13787	3.49855
162	O=S(C1=CC=CC(S(=O)(O)=O)=C1)(C2=CC(S(=O)(O)=O)=C(SC3=CC(C=CC(S)=C4)=C4C=C3)C=C2)=O	O=C(C1=CC=CC=C1)C2=CC=CC=C2	0.4	18.9405	266.376	5.42076	1.14203	3.49407
3066	O=C(C1=CC=C(OC2=CC=C(S(=O)(O)=O)C=C2)C=C1)C3=CC=CC=C3	O=S(C1=CC=C(O)C=C1)(C2=CC=C(OC3=CC=CC=C3)C=C2)=O	0.9	23.3393	310.445	6.67984	1.08555	3.49398
3045	O=C(C1=CC=C(OC2=CC=C(S(=O)(O)=O)C=C2)C=C1)C3=CC=CC=C3	O=S(C1=CC=CC=C1)(C2=CC=C(OC3=CC=C(O)C(C4=CC=C(F)C=C4)=C3)C=C2)=O	0.9	23.1786	312.555	6.63513	1.07306	3.49331
280	O=C(C1=CC=C(OCCCS(=O)(O)=O)C=C1)C2=CC=C(C(C3=CC=C(OCCCS(=O)(O)=O)C=C3)=O)C=C2	OC(C=C1)=CC=C1C(C=C2)=CC=C2OC3=C(C#N)C=CC=C3	0.5	19.301	291.774	5.52607	1.3176	3.49272
124	O=S(C1=CC=CC(C2=CC=CC(S(=O)(O)=O)=C2)=C1)(O)=O	O=C(C1=CC=C(C=C1)F)C2=CC=C(C=C2)OC3=CC=C(C=C3)C(C)(C4=CC=C(C=C4)O)C	0.4	18.2274	313.842	5.21935	1.23995	3.49227
244	C=C(C1=CC(S(=O)(O)=O)=CC=C1)C2=CC=CC=C2	O=C(C1=CC(C(C2=CC=CC=C2)=O)=CC=C1)C(C=C3)=CC=C3OC4=CC=C(O)C=C4	0.5	19.5604	286.613	5.60152	1.16867	3.49198
425	O=C(C1=CC(S(=O)(O)=O)=CC=C1)C2=CC=CC=C2	FC1=C(O)C(F)=C(F)C(C2=C(F)C(F)=C(OC3=CC=C(C4=CC=C(O)C=C4)C=C3)C(F)=C2F)=C1F	0.6	18.2048	314.469	5.21507	1.30226	3.49081
195	O=S(C1=CC=CC=C1)(O)=O	SC1=CC(C=C2)=C(C=C1)C=C2SC3=C(C#N)C=CC=C3	0.5	18.4174	282.993	5.27756	1.39483	3.48976
2993	O=C(C1=CC=C(OC2=CC=C(S(=O)(O)=O)C=C2)C=C1)C3=CC=CC=C3	O=S(C1=CC=C(O)C=C1)(C2=CC=C(OC3=CC=C(C(C4=CC=CC=C4)=O)C=C3)C=C2)=O	0.9	23.1907	311.62	6.66595	1.07287	3.47898
2998	O=C(C1=CC=C(OC2=CC=C(S(=O)(O)=O)C=C2)C=C1)C3=CC=CC=C3	OC1=CC=C(OC2=CC=C(OC3=CC=C(S(C4=CC=CC=C4)(=O)=O)C=C3)C=C2)C=C1	0.9	22.8116	314.212	6.56474	1.08279	3.47486
196	O=S(C1=CC=CC=C1)(O)=O	SC(C=C1)=CC=C1SC(C=C2)=CC=C2SC3=C(C#N)C=CC=C3	0.5	18.5391	285.418	5.336	1.33355	3.47434
1547	O=C(C1=CC=C(OC2=CC(C3=CC(OC)=C(S(=O)(O)=O)C=C3)=C(O)C=C2)C=C1)C4=CC=CC=C4	O=S(C1=CC=CC=C1)(C2=CC=C(OC3=CC=C(S(=O)(C4=CC=CC=C4)=O)C=C3)C=C2)=O	0.8	18.3569	323.249	5.2853	1.38098	3.4732
1586	O=C(C1=CC=C(OC2=CC(C3=CC(OC)=C(S(=O)(O)=O)C=C3)=C(O)C=C2)C=C1)C4=CC=CC=C4	O=C(C1=CC=CC(C(C2=CC=C(OC3=CC=C(C(C)(C)C4=CC=C(O)C=C4)C=C3)C=C2)=O)=C1)C5=CC=CC=C5	0.8	17.5405	322.735	5.05272	1.46573	3.4715
966	O=C(C1=CC=C(OC2=CC=C(S(=O)(O)=O)C=C2)C=C1)C3=CC=CC=C3	OC(C=C1)=CC=C1C(C=C2)=CC=C2OC3=C(C#N)C=CC=C3	0.7	20.0116	302.702	5.76597	1.26798	3.47063
2966	O=C(C1=CC=C(OC2=CC=C(S(=O)(O)=O)C=C2)C=C1)C3=CC=CC=C3	O=C(C1=CC=C(F)C=C1)C(C=C2)=CC=C2OC(C=C3)=CC=C3C(C(F)(F)F)(C(F)(F)F)C4=CC=CC=C4	0.9	23.2273	278.367	6.69964	1.12106	3.46694
91	C=C(C1=CC(S(=O)(O)=O)=CC=C1)C2=CC=CC=C2	O=C(C1=CC(C(C2=CC=CC=C2)=O)=CC=C1)C(C=C3)=CC=C3OC4=CC=C(O)C=C4	0.4	18.7647	309.43	5.41883	1.17085	3.46288
67	O=S(C1=CC=CC=C1)(O)=O	O=C(C1=CC(C(C2=CC=CC=C2)=O)=CC=C1)C(C=C3)=CC=C3OC4=CC=C(O)C=C4	0.4	20.241	301.189	5.85232	1.24645	3.45863
1669	O=C(C1=CC=C(OC2=CC=C(S(=O)(O)=O)C=C2)C=C1)C3=CC=CC=C3	O=C(C1=CC=CC(C=O)=C1)NC(C=C2)=CC=C2OC3=C(C#N)C(OC4=CC=C(N)C=C4)=CC=C3	0.8	20.755	276.693	6.00103	1.09503	3.45857
3008	O=C(C1=CC=C(OC2=CC=C(S(=O)(O)=O)C=C2)C=C1)C3=CC=CC=C3	O=C(C1=CC=CC=C1)C(C=C2)=CC=C2OC(C(C)=C3)=C(C)C=C3C4=CC(C)=C(O)C(C)=C4	0.9	24.0963	312.717	6.96922	1.13227	3.45754
2957	O=C(C1=CC=C(OC2=CC=C(S(=O)(O)=O)C=C2)C=C1)C3=CC=CC=C3	O=S(C1=CC=CC=C1)(C2=CC=C(OC3=CC=C(O)C(C4=CC(F)=C(F)C=C4)=C3)C=C2)=O	0.9	22.8824	311.231	6.62037	1.07995	3.45636
849	CCC1=CC=C(OCCCCS(=O)(O)=O)C=C1	O=C(C1=CC=C(C(C2=CC=C(OC3=CC=C(O)C(C(C)(C)C)=C3)C=C2)=O)C=C1)C4=CC=CC=C4	0.7	18.2728	295.532	5.29485	1.16641	3.45104
3035	O=C(C1=CC=C(OC2=CC=C(S(=O)(O)=O)C=C2)C=C1)C3=CC=CC=C3	OC(C=C1)=CC=C1C(C(F)(F)F)(C(F)(F)F)C(C=C2)=CC=C2OC3=CC=C(C(C4=CC=CC=C4)=O)C=C3	0.9	23.0217	312.093	6.67121	1.1146	3.4509
424	O=C(C1=CC(S(=O)(O)=O)=CC=C1)C2=CC=CC=C2	O=P(C1=CC=C(SC2=CC=C(SC3=CC=C(S)C=C3)C=C2)C=C1)(C4=CC=CC=C4)C5=CC=CC=C5	0.6	17.6391	309.223	5.11213	1.1219	3.45045
1682	O=C(C1=CC=C(OC2=CC=C(S(=O)(O)=O)C=C2)C=C1)C3=CC=CC=C3	O=C(C1=CC=CC=C1)C2=CC=CC=C2	0.8	21.6968	268.242	6.29309	1.13686	3.44772
3020	O=C(C1=CC=C(OC2=CC=C(S(=O)(O)=O)C=C2)C=C1)C3=CC=CC=C3	O=S(C1=CC=CC=C1)(C2=CC=C(OC3=CC=C(S(=O)(C4=CC=CC=C4)=O)C=C3)C=C2)=O	0.9	22.9592	278.094	6.66057	1.06945	3.44704
556	OC1=CC=CC(OC2=CC=C(C=CC=C3)C3=C2)=C1C(C4=C(S(=O)(O)=O)C=CC=C4)=O	O=S(C1=CC=C(S(=O)(O)=O)C=C1)(O)=O	0.6	19.0443	295.964	5.53489	0.950686	3.44077
3095	O=C(C1=CC=C(OC2=CC=C(S(=O)(O)=O)C=C2)C=C1)C3=CC=CC=C3	OC1=CC=C(C(C2=C(C(O)=O)C=CC=C2)C3=CC=C(OC4=CC=CC=C4C#N)C=C3)C=C1	0.9	22.6578	308.745	6.58718	1.1153	3.43968
710	O=S(C1=CC=CC=C1)(O)=O	SC1=CC(C=C2)=C(C=C1)C=C2SC3=C(C#N)C=CC=C3	0.7	18.4978	275.636	5.37815	1.37155	3.43944
3058	O=C(C1=CC=C(OC2=CC=C(S(=O)(O)=O)C=C2)C=C1)C3=CC=CC=C3	OC1=CC=C(C(C(C=C2)=CC=C2OC(C=C3)=CC=C3C(CCC(O)=O)(C)C4=CC=CC=C4)=O)C=C1	0.9	23.3282	311.344	6.78962	1.12841	3.43586
2988	O=C(C1=CC=C(OC2=CC=C(S(=O)(O)=O)C=C2)C=C1)C3=CC=CC=C3	OC1=C(OC2=CC=C(C(C3=CC(C(C4=CC=CC=C4)=O)=CC=C3)=O)C=C2)C=C5C(C6C=CC5C6)=C1	0.9	23.2134	305.791	6.75726	1.14052	3.43533
377	O=S(C1=C(OC2=CC=C(C3=NC4=C(C=C(N=CS5)C5=C4)S3)C=C2S(=O)(O)=O)C=CC=C1)(O)=O	OC1=CC=C(OC2=CC=C(OC3=CC=C(S(C4=CC=CC=C4)(=O)=O)C=C3)C=C2)C=C1	0.6	17.5338	376.488	5.10492	1.18653	3.43468
719	O=S(C1=C(OC2=CC=C(C3=NC4=C(C=C(N=CS5)C5=C4)S3)C=C2S(=O)(O)=O)C=CC=C1)(O)=O	O=C(C1=CC(C2=C(OC)C=CC=C2)=C(OC)C=C1)C(C=C3)=CC=C3OC4=CC=C(C(O)=O)C=C4	0.7	17.6955	376.727	5.15281	1.33027	3.43415
787	O=C(C1=CC=C(OC2=CC=C(P(C3=CC=C(O)C=C3)(C4=CC=CC=C4)=O)C=C2)C(S(=O)(O)=O)=C1)C5=CC(S(=O)(O)=O)=CC=C5	O=CC1=CC=C(OC2=CC=C(C3=NC4=C(C=C(C5=CC(N=CN6)=C6C=C5)C=C4)N3)C=C2)C=C1	0.7	17.7913	290.258	5.1854	1.17158	3.43103
1551	O=C(C1=CC=C(OC2=CC(C3=CC(OC)=C(S(=O)(O)=O)C=C3)=C(O)C=C2)C=C1)C4=CC=CC=C4	O=C(C1=CC(C2=C(OC)C=CC=C2)=C(OC)C=C1)C(C=C3)=CC=C3OC4=CC=C(C(O)=O)C=C4	0.8	18.2894	313.102	5.33362	1.46408	3.42908
433	O=C(C1=CC(S(=O)(O)=O)=CC=C1)C2=CC=CC=C2	O=C(C1=CC=CC=C1)C(C=C2)=CC=C2OC(C(C)=C3)=C(C)C=C3C4=CC(C)=C(O)C(C)=C4	0.6	20.0617	273.892	5.85267	1.29908	3.42779
1574	O=C(C1=CC=C(OC2=CC(C3=CC(OC)=C(S(=O)(O)=O)C=C3)=C(O)C=C2)C=C1)C4=CC=CC=C4	O=C(NC1=O)C2=CC=C3C4=C2C1=CC=C4C(N(CCCCCCCCCC)C3=O)=O	0.8	19.1168	296.559	5.58255	1.43168	3.42439
1060	OC1=CC=CC(OC2=CC=C(C=CC=C3)C3=C2)=C1C(C4=C(S(=O)(O)=O)C=CC=C4)=O	OC1=CC=C(C(C2=C(C(O)=O)C=CC=C2)C3=CC=C(OC4=CC=CC=C4C#N)C=C3)C=C1	0.7	18.7109	308.738	5.46478	1.25761	3.42391
3068	O=C(C1=CC=C(OC2=CC=C(S(=O)(O)=O)C=C2)C=C1)C3=CC=CC=C3	O=C(C1=CC(C(C2=CC=CC=C2)=O)=CC=C1)C(C=C3)=CC=C3OC4=CC=C(C5=CC=C(O)C=C5)C=C4	0.9	22.3416	308.579	6.52867	1.09606	3.42207
2965	O=C(C1=CC=C(OC2=CC=C(S(=O)(O)=O)C=C2)C=C1)C3=CC=CC=C3	FC1=C(O)C(F)=C(F)C(C2=C(F)C(F)=C(OC3=CC=C(C4=CC=C(O)C=C4)C=C3)C(F)=C2F)=C1F	0.9	22.4583	314.609	6.56656	1.12774	3.4201
3000	O=C(C1=CC=C(OC2=CC=C(S(=O)(O)=O)C=C2)C=C1)C3=CC=CC=C3	O=C(C1=CC=C(C(C2=CC=C(OC3=CC=C(O)C(C(C)(C)C)=C3)C=C2)=O)C=C1)C4=CC=CC=C4	0.9	23.2277	307.029	6.79873	1.13123	3.41647
1053	OC1=CC=CC(OC2=CC=C(C=CC=C3)C3=C2)=C1C(C4=C(S(=O)(O)=O)C=CC=C4)=O	OC1=CC=C(C2=CC=C(C3=CC=CC=C3C#N)C=C2)C=C1	0.7	18.6818	308.436	5.47061	1.054	3.41495
1009	OC1=CC=CC(OC2=CC=C(C=CC=C3)C3=C2)=C1C(C4=C(S(=O)(O)=O)C=CC=C4)=O	O=S(C1=CC=CC=C1)(C2=CC=C(OC3=CC=C(O)C(C4=CC(F)=C(F)C=C4)=C3)C=C2)=O	0.7	17.6915	322.462	5.1811	1.1497	3.41462
1042	OC1=CC=CC(OC2=CC=C(C=CC=C3)C3=C2)=C1C(C4=C(S(=O)(O)=O)C=CC=C4)=O	O=S(C1=CC=C(OC2=CC=CC=C2C3=CC=C(F)C=C3)C=C1)(C4=CC=C(O)C=C4)=O	0.7	17.7779	311.621	5.20699	1.19519	3.41424
219	O=C(C1=CC(S(=O)(O)=O)=CC=C1)C2=CC=CC=C2	O=C(C1=CC=C(C(C2=CC=C(OC3=CC=C(O)C(C(C)(C)C)=C3)C=C2)=O)C=C1)C4=CC=CC=C4	0.5	18.7068	276.142	5.48579	1.17999	3.41004
1024	OC1=CC=CC(OC2=CC=C(C=CC=C3)C3=C2)=C1C(C4=C(S(=O)(O)=O)C=CC=C4)=O	OC(C=C1)=CC=C1C(C)(C)C(C=C2)=CC=C2OC3=CC=C(C(C4=CC=CC=C4)=O)C=C3	0.7	19.4502	327.189	5.70447	1.15376	3.40965
1021	OC1=CC=CC(OC2=CC=C(C=CC=C3)C3=C2)=C1C(C4=C(S(=O)(O)=O)C=CC=C4)=O	CCC1=CC=C(OCCCC)C=C1	0.7	17.8368	305.504	5.23315	1.0242	3.40842
3053	O=C(C1=CC=C(OC2=CC=C(S(=O)(O)=O)C=C2)C=C1)C3=CC=CC=C3	OC1=CC=C(S(=O)(C2=CC=C(OC3=CC=C(S(C4=CC=CC=C4)(=O)=O)C=C3)C=C2)=O)C=C1	0.9	23.1223	310.283	6.78831	1.06922	3.40619
2872	O=C(C1=CC=C(OC2=CC(C3=CC(OC)=C(S(=O)(O)=O)C=C3)=C(O)C=C2)C=C1)C4=CC=CC=C4	O=C(C1=CC=C(OC2=CC=C(C(C)(C)C3=CC=C(O)C=C3)C=C2)C=C1)C4=CC=CC=C4	0.9	22.9426	316.953	6.74254	1.4432	3.40267
1019	OC1=CC=CC(OC2=CC=C(C=CC=C3)C3=C2)=C1C(C4=C(S(=O)(O)=O)C=CC=C4)=O	O=S(C1=C(C2=NC3=C(C=C(N=CS4)C4=C3)S2)C=CC=C1)(C5=CC=CC=C5)=O	0.7	17.589	337.109	5.17347	1.01397	3.39985
368	O=S(C1=CC=CC=C1)(O)=O	O=C(C1=CC(C(C2=CC=CC=C2)=O)=CC=C1)C(C=C3)=CC=C3OC4=CC=C(O)C=C4	0.6	20.7797	266.434	6.11249	1.34863	3.39955
1687	O=C(C1=CC=C(OC2=CC=C(S(=O)(O)=O)C=C2)C=C1)C3=CC=CC=C3	O=C(C1=CC(C(C2=CC=CC=C2)=O)=CC=C1)C(C=C3)=CC=C3OC4=CC=C(O)C=C4	0.8	21.2195	306.306	6.2456	1.07958	3.39751
851	CCC1=CC=C(OCCCCS(=O)(O)=O)C=C1	O=C(C1=CC(C(C2=CC=CC=C2)=O)=CC=C1)C(C=C3)=CC=C3OC4=CC=C(C5=CC=C(O)C=C5)C=C4	0.7	17.8275	310.747	5.24835	1.21956	3.39679
370	O=S(C1=CC=CC=C1)(O)=O	SC(C=C1)=CC=C1SC(C=C2)=CC=C2SC3=C(C#N)C=CC=C3	0.6	18.5064	285.099	5.45122	1.36228	3.39491
1187	OC1=CC(S(=O)(O)=O)=C(OC2=CC=CC=C2C#N)C=C1	O=C(C1=CC=CC(C=O)=C1)NC(C=C2)=CC=C2OC3=C(C#N)C(OC4=CC=C(N)C=C4)=CC=C3	0.7	17.9339	271.609	5.28346	1.38463	3.39434
979	O=C(C1=CC=C(OC2=CC=C(S(=O)(O)=O)C=C2)C=C1)C3=CC=CC=C3	O=C(C1=CC(C(C2=CC=CC=C2)=O)=CC=C1)C(C=C3)=CC=C3OC4=CC=C(O)C=C4	0.7	19.9299	307.454	5.87261	1.09386	3.3937
1950	OC1=CC(C=C(S(=O)(O)=O)C=C2)=C2C=C1OC3=CC=CC=C3C#N	O=C(C1=C2C(C=CC=C23)=CC=C1)N(C4=CC=CC(C(C5=CC=CC=C5)=O)=C4)C3=O	0.8	17.861	289.889	5.27104	1.29512	3.38852
717	O=S(C1=C(OC2=CC=C(C3=NC4=C(C=C(N=CS5)C5=C4)S3)C=C2S(=O)(O)=O)C=CC=C1)(O)=O	O=C(C1=CC=C(C(C2=CC=C(OC3=CC=C(O)C(C(C)(C)C)=C3)C=C2)=O)C=C1)C4=CC=CC=C4	0.7	18.3644	321.103	5.42011	1.38558	3.3882
17	O=S(C1=CC=CC=C1)(O)=O	O=C(C1=CC(C(C2=CC=CC=C2)=O)=CC=C1)C(C=C3)=CC=C3OC4=CC=C(O)C=C4	0.3	19.6744	323.518	5.81246	1.23695	3.38486
1626	O=C(C1=CC=C(OC2=CC=C(S(=O)(O)=O)C=C2)C=C1)C3=CC=CC=C3	O=S(C1=CC=C(O)C=C1)(C2=CC=C(OC3=CC=C(C(C4=CC=CC=C4)=O)C=C3)C=C2)=O	0.8	22.1199	314.376	6.53762	1.0874	3.38348
613	O=S(C1=CC=CC(C2=CC=CC(S(=O)(O)=O)=C2)=C1)(O)=O	SC1=CC=C(SC2=CC=C(SC3=CC=C(S(C4=CC=CC=C4)(=O)=O)C=C3)C=C2)C=C1	0.6	17.8081	307.536	5.26361	1.11382	3.38325
2985	O=C(C1=CC=C(OC2=CC=C(S(=O)(O)=O)C=C2)C=C1)C3=CC=CC=C3	O=C(C1=CC=C(OC2=CC=C(P(C3=CC=C(O)C=C3)(C4=CC=CC=C4)=O)C=C2)C=C1)C5=CC=CC=C5	0.9	22.2579	312.286	6.58136	1.09689	3.38196
1630	O=C(C1=CC=C(OC2=CC=C(S(=O)(O)=O)C=C2)C=C1)C3=CC=CC=C3	OC1=CC=C(OC2=CC=C(OC3=CC=C(S(C4=CC=CC=C4)(=O)=O)C=C3)C=C2)C=C1	0.8	20.7708	320.359	6.15444	1.08734	3.37493
481	CCC1=CC=C(OCCCCS(=O)(O)=O)C=C1	O=C(C1=CC=C(C(C2=CC=C(OC3=CC=C(O)C(C(C)(C)C)=C3)C=C2)=O)C=C1)C4=CC=CC=C4	0.6	19.0901	301.867	5.66225	1.18641	3.37148
308	O=S(C1=CC=CC(C2=CC=CC(S(=O)(O)=O)=C2)=C1)(O)=O	SC(C=C1)=CC=C1SC(C=C2)=CC=C2SC3=C(C#N)C=CC=C3	0.5	18.4989	297.725	5.4872	1.19702	3.37129
1661	O=C(C1=CC=C(OC2=CC=C(S(=O)(O)=O)C=C2)C=C1)C3=CC=CC=C3	O=S(C1=CC=C(O)C=C1)(C2=CC=C(OC3=CC=C(C=CC=C4)C4=C3)C=C2)=O	0.8	21.655	309.858	6.42431	1.06777	3.37079
711	O=S(C1=CC=CC=C1)(O)=O	SC(C=C1)=CC=C1SC(C=C2)=CC=C2SC3=C(C#N)C=CC=C3	0.7	18.3787	276.96	5.46299	1.37097	3.36422
718	O=S(C1=C(OC2=CC=C(C3=NC4=C(C=C(N=CS5)C5=C4)S3)C=C2S(=O)(O)=O)C=CC=C1)(O)=O	O=C1N(C2=CC=CC=C2C(F)(F)F)C(C3=CC=CC4=C3C1=CC=C4)=O	0.7	18.0315	325.72	5.36112	1.36135	3.36337
3247	OC1=CC=CC(OC2=CC=C(C=CC=C3)C3=C2)=C1C(C4=C(S(=O)(O)=O)C=CC=C4)=O	O=P(C1=CC=C(SC2=CC=C(SC3=CC=C(S)C=C3)C=C2)C=C1)(C4=CC=CC=C4)C5=CC=CC=C5	0.9	20.0358	334.089	5.95814	1.10197	3.36275
616	O=S(C1=CC=CC(C2=CC=CC(S(=O)(O)=O)=C2)=C1)(O)=O	SC(C=C1)=CC=C1SC(C=C2)=CC=C2SC3=C(C#N)C=CC=C3	0.6	18.4647	289.978	5.49982	1.17932	3.35734
107	O=S(C1=CC=CC(S(=O)(O)=O)=C1)(C2=CC=C(OC3=CC=C(C4=CC=C(O)C=C4)C=C3)C(S(=O)(O)=O)=C2)=O	O=C(C1=CC(C2=C(OC)C=CC=C2)=C(OC)C=C1)C(C=C3)=CC=C3OC4=CC=C(C(O)=O)C=C4	0.4	17.7768	305.003	5.29548	1.28396	3.35699
1703	O=C(C1=CC=C(OC2=CC=C(S(=O)(O)=O)C=C2)C=C1)C3=CC=CC=C3	O=C(C1=CC=C(C2=CC=C(OC3=CC=CC=C3)C=C2)C=C1)C4=CC=CC=C4	0.8	21.3522	281.815	6.36234	1.12434	3.35602
1218	O=S(C1=CC=CC=C1)(O)=O	SC(C=C1)=CC=C1SC(C=C2)=CC=C2SC3=C(C#N)C=CC=C3	0.8	18.5188	277.264	5.52129	1.3704	3.35408
528	O=C(C1=CC=C(OC2=CC=C(S(=O)(O)=O)C=C2)C=C1)C3=CC=CC=C3	O=C(C1=CC=C(C2=CC=C(OC3=CC=CC=C3)C=C2)C=C1)C4=CC=CC=C4	0.6	19.1301	294.394	5.70563	1.22265	3.35284
524	O=C(C1=CC=C(OC2=CC=C(S(=O)(O)=O)C=C2)C=C1)C3=CC=CC=C3	O=C(C1=CC(C(C2=CC=CC=C2)=O)=CC=C1)C(C=C3)=CC=C3OC4=CC=C(O)C=C4	0.6	18.7139	316.063	5.58488	1.13616	3.35081
1017	OC1=CC=CC(OC2=CC=C(C=CC=C3)C3=C2)=C1C(C4=C(S(=O)(O)=O)C=CC=C4)=O	O=C(C1=CC=C(C(C2=CC=C(OC3=CC=C(O)C(C(C)(C)C)=C3)C=C2)=O)C=C1)C4=CC=CC=C4	0.7	18.3199	321.59	5.47371	1.1732	3.34689
2809	O=C(C1=CC=C(OC2=CC(C3=CC(OC)=C(S(=O)(O)=O)C=C3)=C(O)C=C2)C=C1)C4=CC=CC=C4	O=C(C1=CC=C(C=C1)F)C2=CC=C(C=C2)OC3=CC=C(C=C3)C(C)(C4=CC=C(C=C4)O)C	0.9	22.6132	319.33	6.7595	1.44755	3.3454
338	O=S(C1=CC=CC(S(=O)(O)=O)=C1)(C2=CC(S(=O)(O)=O)=C(SC3=CC(C=CC(S)=C4)=C4C=C3)C=C2)=O	SC(C=C1)=CC=C1SC(C=C2)=CC=C2SC3=C(C#N)C=CC=C3	0.5	19.8867	328.444	5.96183	1.1486	3.33566
355	O=S(C1=CC=CC(S(=O)(O)=O)=C1)(C2=CC=C(OC3=CC=C(C4=CC=CC=C4)C=C3)C(S(=O)(O)=O)=C2)=O	O=C(C1=CC(C(C2=CC=CC=C2)=O)=CC=C1)C(C=C3)=CC=C3OC4=CC=C(O)C=C4	0.6	20.1791	325.121	6.05016	1.01143	3.3353
509	O=C(C1=CC=C(OC2=CC=C(S(=O)(O)=O)C=C2)C=C1)C3=CC=CC=C3	O=C(C1=CC(C2=C(OC)C=CC=C2)=C(OC)C=C1)C(C=C3)=CC=C3OC4=CC=C(C(O)=O)C=C4	0.6	20.1474	290.369	6.04485	1.28388	3.33299
283	O=C(C1=CC=C(OCCCS(=O)(O)=O)C=C1)C2=CC=C(C(C3=CC=C(OCCCS(=O)(O)=O)C=C3)=O)C=C2	OC1=CC=C(C2=CC=C(C3=CC=CC=C3C#N)C=C2)C=C1	0.5	18.697	289.04	5.61242	1.28205	3.33137
1191	OC1=CC(S(=O)(O)=O)=C(OC2=CC=CC=C2C#N)C=C1	O=C(C1=CC(C(C2=CC=CC=C2)=O)=CC=C1)C(C=C3)=CC=C3OC4=CC=C(O)C=C4	0.7	19.194	288.319	5.76241	1.43527	3.33089
596	O=C(C1=CC=C(OCCCS(=O)(O)=O)C=C1)C2=CC=C(C(C3=CC=C(OCCCS(=O)(O)=O)C=C3)=O)C=C2	C=S(C(C=C1)=CC=C1OC2=CC3=CC=CC=C3C=C2)(C4=CC=C(OC5=CC=C(C=CC(O)=C6)C6=C5)C=C4)=C	0.6	17.8072	278.641	5.34935	1.11342	3.32886
1449	O=C(C1=CC=C(OC2=CC=C(P(C3=CC=C(O)C=C3)(C4=CC=CC=C4)=O)C=C2)C(S(=O)(O)=O)=C1)C5=CC(S(=O)(O)=O)=CC=C5	N#CC1=C(C2=CC=C(OC3=CC=CC=C3)C=C2)C=CC=C1	0.8	19.0297	339.812	5.71743	1.10355	3.32836
1027	OC1=CC=CC(OC2=CC=C(C=CC=C3)C3=C2)=C1C(C4=C(S(=O)(O)=O)C=CC=C4)=O	O=C(C1=CC=C(CCC)C=C1)C2=CC=CC=C2	0.7	19.3972	312.205	5.83388	1.03413	3.32493
3026	O=C(C1=CC=C(OC2=CC=C(S(=O)(O)=O)C=C2)C=C1)C3=CC=CC=C3	O=C(C1=CC(C2=C(OC)C=CC=C2)=C(OC)C=C1)C(C=C3)=CC=C3OC4=CC=C(C(O)=O)C=C4	0.9	22.4777	287.998	6.76213	1.14318	3.32406
1685	O=C(C1=CC=C(OC2=CC=C(S(=O)(O)=O)C=C2)C=C1)C3=CC=CC=C3	O=S(C1=CC=C(O)C=C1)(C2=CC=C(OC3=CC=CC=C3)C=C2)=O	0.8	21.5141	313.051	6.47415	1.10784	3.32308
1652	O=C(C1=CC=C(OC2=CC=C(S(=O)(O)=O)C=C2)C=C1)C3=CC=CC=C3	O=C(C1=CC(C2=C(OC)C=CC=C2)=C(OC)C=C1)C(C=C3)=CC=C3OC4=CC=C(C(O)=O)C=C4	0.8	21.3175	287.933	6.41641	1.19766	3.32233
1678	O=C(C1=CC=C(OC2=CC=C(S(=O)(O)=O)C=C2)C=C1)C3=CC=CC=C3	OC1=CC=C(S(C2=CC=C(OC3=CC=C(C4=CC=CC=C4)C=C3)C=C2)(=O)=O)C=C1	0.8	21.25	314.968	6.39643	1.07182	3.32217
467	C=C(C1=CC(S(=O)(O)=O)=CC=C1)C2=CC=CC=C2	OC(C=C1)=CC=C1P(C(C=C2)=CC=C2OC(C=C3)=CC=C3C(C4=CC=CC(C(C5=CC=CC=C5)=O)=C4)=O)(C6=CC=CC=C6)=O	0.6	17.8008	292.175	5.36365	1.1768	3.31878
2942	O=C(C1=CC=C(OC2=CC(C3=CC(OC)=C(S(=O)(O)=O)C=C3)=C(O)C=C2)C=C1)C4=CC=CC=C4	SC1=CC(C=C2)=C(C=C1)C=C2SC3=C(C#N)C=CC=C3	0.9	21.7273	310.207	6.55125	1.42011	3.31651
2992	O=C(C1=CC=C(OC2=CC=C(S(=O)(O)=O)C=C2)C=C1)C3=CC=CC=C3	FC(C(C1=CC=CC=C1)(C(F)(F)F)C2=CC=C(C3=NC4=C(N3)C=C(C5=CC=C(NC=N6)C6=C5)C=C4)C=C2)(F)F	0.9	21.2745	279.599	6.415	1.19001	3.31637
1554	O=C(C1=CC=C(OC2=CC(C3=CC(OC)=C(S(=O)(O)=O)C=C3)=C(O)C=C2)C=C1)C4=CC=CC=C4	O=C(NC1=O)C2=CC=C3C4=C2C1=CC=C4C(N(C5=CC6=C(NC7=C6C=C(C)C=C7)C=C5)C3=O)=O	0.8	18.6935	282.535	5.64168	1.31915	3.31347
2984	O=C(C1=CC=C(OC2=CC=C(S(=O)(O)=O)C=C2)C=C1)C3=CC=CC=C3	OC1=CC=C(C(C(F)(F)F)(C(F)(F)F)C2=CC=C(OC3=CC=C(S(C4=CC=CC=C4)(=O)=O)C=C3)C=C2)C=C1	0.9	22.6682	311.174	6.84603	1.13682	3.31114
2958	O=C(C1=CC=C(OC2=CC=C(S(=O)(O)=O)C=C2)C=C1)C3=CC=CC=C3	O=S(C1=CC=C(O)C=C1)(C2=CC=C(OC3=CC=C(C(C(F)(F)F)(C(F)(F)F)C4=CC=CC=C4)C=C3)C=C2)=O	0.9	22.6995	310.467	6.856	1.13656	3.3109
1741	OC1=CC=CC(OC2=CC=C(C=CC=C3)C3=C2)=C1C(C4=C(S(=O)(O)=O)C=CC=C4)=O	O=CC1=CC=C(OC2=CC=C(C3=NC4=C(C=C(C5=CC(N=CN6)=C6C=C5)C=C4)N3)C=C2)C=C1	0.8	19.8212	282.818	5.99173	1.16831	3.3081
2962	O=C(C1=CC=C(OC2=CC=C(S(=O)(O)=O)C=C2)C=C1)C3=CC=CC=C3	C=S(C(C=C1)=CC=C1OC2=CC3=CC=CC=C3C=C2)(C4=CC=C(OC5=CC=C(C=CC(O)=C6)C6=C5)C=C4)=C	0.9	21.6709	310.468	6.55573	1.11099	3.30565
1666	O=C(C1=CC=C(OC2=CC=C(S(=O)(O)=O)C=C2)C=C1)C3=CC=CC=C3	O=S(C1=CC=CC=C1)(C2=CC=C(OC3=CC=C(O)C(C4=CC=C(F)C=C4)=C3)C=C2)=O	0.8	21.1992	317.042	6.41759	1.07688	3.3033
1660	O=C(C1=CC=C(OC2=CC=C(S(=O)(O)=O)C=C2)C=C1)C3=CC=CC=C3	OC1=CC=CC(OC2=CC=C(C=CC=C3)C3=C2)=C1C#N	0.8	21.1648	304.892	6.40735	1.08282	3.3032
1672	O=C(C1=CC=C(OC2=CC=C(S(=O)(O)=O)C=C2)C=C1)C3=CC=CC=C3	O=S(C1=CC=C(OC2=CC=CC=C2C3=CC=C(F)C=C3)C=C1)(C4=CC=C(O)C=C4)=O	0.8	21.2658	313.974	6.44566	1.10562	3.29924
2878	O=C(C1=CC=C(OC2=CC(C3=CC(OC)=C(S(=O)(O)=O)C=C3)=C(O)C=C2)C=C1)C4=CC=CC=C4	O=C(C1=CC=C(CCC)C=C1)C2=CC=CC=C2	0.9	22.1004	311.975	6.70071	1.41786	3.29821
221	O=C(C1=CC(S(=O)(O)=O)=CC=C1)C2=CC=CC=C2	O=C(C1=CC=C(OC2=CC=C(C(C3=CC=CC=C3C(O)=O)C4=CC=C(O)C=C4)C=C2)C=C1)C5=CC=CC=C5	0.5	17.5987	298.856	5.337	1.23818	3.29748
39	O=S(C1=CC=CC(C2=CC=CC(S(=O)(O)=O)=C2)=C1)(O)=O	O=C(C1=CC=C(C2=CC=C(OC3=CC=CC=C3)C=C2)C=C1)C4=CC=CC=C4	0.3	18.3818	290.596	5.58852	1.2439	3.2892
640	OC1=CC(C=C(S(=O)(O)=O)C=C2)=C2C=C1OC3=CC=CC=C3C#N	O=C(C1=CC=CC=C1)C2=CC=C(C(C3=CC=CC=C3)=O)C=C2	0.6	19.1644	290.209	5.82666	1.15679	3.28909
1766	OC1=CC=CC(OC2=CC=C(C=CC=C3)C3=C2)=C1C(C4=C(S(=O)(O)=O)C=CC=C4)=O	CCC1=CC=C(OCCCC)C=C1	0.8	19.418	305.954	5.90644	1.14609	3.28759
1650	O=C(C1=CC=C(OC2=CC=C(S(=O)(O)=O)C=C2)C=C1)C3=CC=CC=C3	SC1=CC=C(SC2=CC=C(SC3=CC=C(S(C4=CC=CC=C4)(=O)=O)C=C3)C=C2)C=C1	0.8	20.026	303.221	6.093	1.09496	3.28672
683	O=S(C1=CC=CC(S(=O)(O)=O)=C1)(C2=CC=C(OC3=CC=C(C4=CC=CC=C4)C=C3)C(S(=O)(O)=O)=C2)=O	OC(C=C1)=CC=C1P(C(C=C2)=CC=C2OC(C=C3)=CC=C3C(C4=CC=CC(C(C5=CC=CC=C5)=O)=C4)=O)(C6=CC=CC=C6)=O	0.7	18.4263	346.718	5.60659	0.963338	3.28655
1607	O=C(C1=CC=C(OC2=CC=C(S(=O)(O)=O)C=C2)C=C1)C3=CC=CC=C3	O=S(C1=CC=CC=C1)(C2=CC=C(OC3=CC=C(O)C(C4=CC(F)=C(F)C=C4)=C3)C=C2)=O	0.8	20.9426	314.455	6.39006	1.07609	3.27738
2977	O=C(C1=CC=C(OC2=CC=C(S(=O)(O)=O)C=C2)C=C1)C3=CC=CC=C3	O=P(C1=CC=C(OC2=CC=C(C3=NNC(C4=C3C=CC=C4)=O)C=C2)C=C1)(C5=CC=CC=C5)C6=CC=CC=C6	0.9	20.8921	283.944	6.38613	1.14627	3.27148
2950	O=C(C1=CC=C(OC2=CC(C3=CC(OC)=C(S(=O)(O)=O)C=C3)=C(O)C=C2)C=C1)C4=CC=CC=C4	N#CC1=C(C2=CC=C(OC3=CC=CC=C3)C=C2)C=CC=C1	0.9	21.2797	314.434	6.50482	1.48925	3.27137
963	O=C(C1=CC=C(OC2=CC=C(S(=O)(O)=O)C=C2)C=C1)C3=CC=CC=C3	O=S(C1=CC=CC=C1)(C2=CC=C(OC3=CC=C(O)C(C4=CC=CC=C4)=C3)C=C2)=O	0.7	19.5966	321.284	5.99383	1.12652	3.26947
2815	O=C(C1=CC=C(OC2=CC(C3=CC(OC)=C(S(=O)(O)=O)C=C3)=C(O)C=C2)C=C1)C4=CC=CC=C4	FC(C(C1=CC=C(C2=NC3=C(C=C(N=CS4)C4=C3)S2)C=C1)(C(F)(F)F)C5=CC=CC=C5)(F)F	0.9	21.3114	307.238	6.52523	1.39438	3.266
2987	O=C(C1=CC=C(OC2=CC=C(S(=O)(O)=O)C=C2)C=C1)C3=CC=CC=C3	O=P(C1=CC=C(O)C=C1)(C2=CC=CC=C2)C(C=C3)=CC=C3OC(C=C4)=CC=C4S(C5=CC=CC=C5)(=O)=O	0.9	21.9582	312.51	6.72572	1.1347	3.2648
2852	O=C(C1=CC=C(OC2=CC(C3=CC(OC)=C(S(=O)(O)=O)C=C3)=C(O)C=C2)C=C1)C4=CC=CC=C4	O=C(C1=CC=CC=C1)C(C=C2)=CC=C2OC(C(C)=C3)=C(C)C=C3C4=CC(C)=C(O)C(C)=C4	0.9	22.6897	318.834	6.95629	1.42559	3.26175
1056	OC1=CC=CC(OC2=CC=C(C=CC=C3)C3=C2)=C1C(C4=C(S(=O)(O)=O)C=CC=C4)=O	O=CC1=CC=CC(C(NC2=CC=CC(C(C(F)(F)F)(C(F)(F)F)C3=CC=C(N)C=C3)=C2)=O)=C1	0.7	18.0957	282.26	5.54887	1.01636	3.26115
964	O=C(C1=CC=C(OC2=CC=C(S(=O)(O)=O)C=C2)C=C1)C3=CC=CC=C3	O=S(C1=CC=CC=C1)(C2=CC=C(OC3=CC=C(O)C=C3)C=C2)=O	0.7	20.1377	317.286	6.18022	1.13677	3.25841
2817	O=C(C1=CC=C(OC2=CC(C3=CC(OC)=C(S(=O)(O)=O)C=C3)=C(O)C=C2)C=C1)C4=CC=CC=C4	O=CC1=CC=C(OC2=CC=C(C3=NC4=C(C=C(C5=CC(N=CN6)=C6C=C5)C=C4)N3)C=C2)C=C1	0.9	20.762	306.813	6.37883	1.36012	3.25483
1045	OC1=CC=CC(OC2=CC=C(C=CC=C3)C3=C2)=C1C(C4=C(S(=O)(O)=O)C=CC=C4)=O	OC1=CC=C(C(C(C=C2)=CC=C2OC(C=C3)=CC=C3C(CCC(O)=O)(C)C4=CC=CC=C4)=O)C=C1	0.7	19.0411	321.472	5.85662	1.25307	3.25121
1612	O=C(C1=CC=C(OC2=CC=C(S(=O)(O)=O)C=C2)C=C1)C3=CC=CC=C3	O=C(C1=CC=C(C=C1)F)C2=CC=C(C=C2)OC3=CC=C(C=C3)C(C)(C4=CC=C(C=C4)O)C	0.8	21.6021	315.215	6.64544	1.19413	3.25066
3021	O=C(C1=CC=C(OC2=CC=C(S(=O)(O)=O)C=C2)C=C1)C3=CC=CC=C3	OC(C=C1)=CC=C1C2=CC=C(OC3=CC(N=C4C5=CC=CC=C5)=C(C=C3)N=C4C(C=C6)=CC=C6C7=NC8=C(N=C7C9=CC=CC=C9)C=CC=C8)C=C2	0.9	19.537	289.393	6.01299	1.14466	3.24914
1702	O=C(C1=CC=C(OC2=CC=C(S(=O)(O)=O)C=C2)C=C1)C3=CC=CC=C3	OC1=CC=C(C(C2=C(C(O)=O)C=CC=C2)C3=CC=C(OC4=CC=CC=C4C#N)C=C3)C=C1	0.8	20.816	307.034	6.40855	1.19032	3.24815
1383	O=C(C1=CC=C(OC2=CC=C(P(C3=CC=C(O)C=C3)(C4=CC=CC=C4)=O)C=C2)C(S(=O)(O)=O)=C1)C5=CC(S(=O)(O)=O)=CC=C5	O=C(N1)C2=C(C(C1=O)=CC=C3)C3=C(C4=C(C=CC=C5C6=O)C5=C(C(N6C7=CC=C(OC8=CC=C(C9=CC=C(OC%10=CC=CC=C%10)C=C9)C=C8)C=C7)=O)C=C4)C=C2	0.8	18.4141	313.132	5.68104	1.39355	3.24132
956	O=C(C1=CC=C(OC2=CC=C(S(=O)(O)=O)C=C2)C=C1)C3=CC=CC=C3	O=C(C1=CC(C2=C(OC)C=CC=C2)=C(OC)C=C1)C(C=C3)=CC=C3OC4=CC=C(C(O)=O)C=C4	0.7	20.3187	289.115	6.26966	1.20925	3.24079
934	O=C(C1=CC=C(OC2=CC=C(S(=O)(O)=O)C=C2)C=C1)C3=CC=CC=C3	OC1=CC=C(C2=CC=C(OC3=CC=C(S(=O)(C4=CC=C(OC5=CC=C(C6=CC=C(O)C=C6)C=C5)C=C4)=O)C=C3)C=C2)C=C1	0.7	17.5248	325.32	5.40829	1.24397	3.24035
2833	O=C(C1=CC=C(OC2=CC(C3=CC(OC)=C(S(=O)(O)=O)C=C3)=C(O)C=C2)C=C1)C4=CC=CC=C4	O=S(C1=CC=C(O)C=C1)(C2=CC=C(OC3=CC=C(C(C4=CC=CC=C4)=O)C=C3)C=C2)=O	0.9	21.7989	321.557	6.72753	1.4382	3.24025
134	O=S(C1=CC=CC(C2=CC=CC(S(=O)(O)=O)=C2)=C1)(O)=O	O=C(C1=CC=CC(C(C2=CC=C(OC3=CC=C(C(C)(C)C4=CC=C(O)C=C4)C=C3)C=C2)=O)=C1)C5=CC=CC=C5	0.4	17.7227	294.969	5.47288	1.16659	3.23827
939	O=C(C1=CC=C(OC2=CC=C(S(=O)(O)=O)C=C2)C=C1)C3=CC=CC=C3	O=S(C1=CC=CC=C1)(C2=CC=C(OC3=CC=C(C=CC(O)=C4)C4=C3)C=C2)=O	0.7	19.8918	312.472	6.14509	1.07845	3.23703
1115	O=S(C1=CC=CC(C2=CC=CC(S(=O)(O)=O)=C2)=C1)(O)=O	O=C(C1=CC(C(C2=CC=CC=C2)=O)=CC=C1)C(C=C3)=CC=C3OC4=CC=C(O)C=C4	0.7	19.5335	269.821	6.03563	1.138	3.23637
278	O=C(C1=CC=C(OCCCS(=O)(O)=O)C=C1)C2=CC=C(C(C3=CC=C(OCCCS(=O)(O)=O)C=C3)=O)C=C2	O=P(C1=CC=C(OC2=CC=C(O)C=C2)C=C1)(C3=CC=CC=C3)C4=CC=CC=C4	0.5	18.9714	320.825	5.86499	1.18341	3.23469
707	O=S(C1=CC=CC=C1)(O)=O	SC1=CC=C(SC2=CC=C(SC3=CC=C(S(C4=CC=CC=C4)(=O)=O)C=C3)C=C2)C=C1	0.7	18.3172	281.596	5.67943	1.26827	3.22519
514	O=C(C1=CC=C(OC2=CC=C(S(=O)(O)=O)C=C2)C=C1)C3=CC=CC=C3	O=S(C1=CC=CC=C1)(C2=CC=C(OC3=CC=C(O)C(C4=CC=CC=C4)=C3)C=C2)=O	0.6	18.1258	335.481	5.62135	1.10307	3.22445
174	O=S(C1=CC=CC(S(=O)(O)=O)=C1)(C2=CC=C(OC3=CC=C(C4=CC=CC=C4)C=C3)C(S(=O)(O)=O)=C2)=O	O=C(C1=CC(C(C2=CC=CC=C2)=O)=CC=C1)C(C=C3)=CC=C3OC4=CC=C(O)C=C4	0.5	19.7532	320.934	6.12823	1.08555	3.22332
1219	O=S(C1=C(OC2=CC=C(C3=NC4=C(C=C(N=CS5)C5=C4)S3)C=C2S(=O)(O)=O)C=CC=C1)(O)=O	O=C(C1=C2C(C=CC=C23)=CC=C1)N(C4=CC=CC(C(C5=CC=CC=C5)=O)=C4)C3=O	0.8	17.5808	354.507	5.45971	1.18727	3.2201
354	O=S(C1=CC=CC(S(=O)(O)=O)=C1)(C2=CC=C(OC3=CC=C(C4=CC=CC=C4)C=C3)C(S(=O)(O)=O)=C2)=O	O=C(C1=CC(C(C2=CC=CC=C2)=O)=CC=C1)C(C=C3)=CC=C3OC4=CC=C(C5=CC=C(O)C=C5)C=C4	0.6	19.0232	326.667	5.908	1.0585	3.21991
137	O=S(C1=CC=CC(C2=CC=CC(S(=O)(O)=O)=C2)=C1)(O)=O	SC1=CC(C=C2)=C(C=C1)C=C2SC3=C(C#N)C=CC=C3	0.4	17.6054	296.907	5.46919	1.32376	3.21901
218	O=C(C1=CC(S(=O)(O)=O)=CC=C1)C2=CC=CC=C2	O=S(C1=CC=C(O)C=C1)(C2=CC=C(OC3=CC=C(C(C4=CC=CC=C4)=O)C=C3)C=C2)=O	0.5	20.2895	276.823	6.31593	1.13123	3.21243
3009	O=C(C1=CC=C(OC2=CC=C(S(=O)(O)=O)C=C2)C=C1)C3=CC=CC=C3	NC1=CC=C(C2(C3=CC=C(NC(CCCCCCC=O)=O)C=C3)C4=CC=CC=C4C5=C2C=CC=C5)C=C1	0.9	22.5836	275.495	7.03321	1.1587	3.21099
99	O=S(C1=CC=CC(S(=O)(O)=O)=C1)(C2=CC=C(OC3=CC=C(O)C(C4=CC=CC=C4)=C3)C(S(=O)(O)=O)=C2)=O	O=C(C1=CC(C2=C(OC)C=CC=C2)=C(OC)C=C1)C(C=C3)=CC=C3OC4=CC=C(C(O)=O)C=C4	0.4	17.7544	304.596	5.5295	1.27631	3.21086
989	O=C(C1=CC=C(OC2=CC=C(S(=O)(O)=O)C=C2)C=C1)C3=CC=CC=C3	O=C(C1=CC=C(C2=CC=C(OC3=CC=CC=C3)C=C2)C=C1)C4=CC=CC=C4	0.7	20.4998	286.112	6.38485	1.16245	3.2107
1696	O=C(C1=CC=C(OC2=CC=C(S(=O)(O)=O)C=C2)C=C1)C3=CC=CC=C3	O=CC1=CC=CC(C(NC2=CC=CC(C(C(F)(F)F)(C(F)(F)F)C3=CC=C(N)C=C3)=C2)=O)=C1	0.8	21.4671	274.593	6.68702	1.0958	3.21026
938	O=C(C1=CC=C(OC2=CC=C(S(=O)(O)=O)C=C2)C=C1)C3=CC=CC=C3	O=S(C1=CC=C(O)C=C1)(C2=CC=C(OC3=CC=C(C(C4=CC=CC=C4)=O)C=C3)C=C2)=O	0.7	21.0227	313.836	6.55753	1.10121	3.20589
2847	O=C(C1=CC=C(OC2=CC(C3=CC(OC)=C(S(=O)(O)=O)C=C3)=C(O)C=C2)C=C1)C4=CC=CC=C4	CC(C)(C1=CC=C(OC2=CC=C(S(C3=CC=CC=C3)(=O)=O)C=C2)C=C1)C4=CC=C(O)C=C4	0.9	21.7819	320.239	6.79493	1.43732	3.20561
3022	O=C(C1=CC=C(OC2=CC=C(S(=O)(O)=O)C=C2)C=C1)C3=CC=CC=C3	OC(C=C1)=CC=C1C2=CC=C(OC3=CC(N=C4C5=CC=CC=C5)=C(C=C3)N=C4C6=CC=C(OC7=NC8=C(N=C7C9=CC=CC=C9)C=CC=C8)C=C6)C=C2	0.9	19.3103	291.999	6.02476	1.14899	3.20515
3030	O=C(C1=CC=C(OC2=CC=C(S(=O)(O)=O)C=C2)C=C1)C3=CC=CC=C3	O=C(N1)C2=C(C(C1=O)=CC=C3)C3=C(C4=C(C=CC=C5C6=O)C5=C(C(N6C7=CC=C(OC8=CC=C(C9=CC=C(OC%10=CC=CC=C%10)C=C9)C=C8)C=C7)=O)C=C4)C=C2	0.9	19.1817	267.707	5.9855	1.37563	3.20469
2912	O=C(C1=CC=C(OC2=CC(C3=CC(OC)=C(S(=O)(O)=O)C=C3)=C(O)C=C2)C=C1)C4=CC=CC=C4	OC1=CC=C(S(C2=CC=C(OC3=CC=C(C4=CC=CC=C4)C=C3)C=C2)(=O)=O)C=C1	0.9	21.7065	319.736	6.77625	1.43631	3.20333
3054	O=C(C1=CC=C(OC2=CC=C(S(=O)(O)=O)C=C2)C=C1)C3=CC=CC=C3	CC(C)(C1=CC=C(OCC2=CN(CC3=CC=CC=C3)N=N2)C=C1)C4=CC=C(C=C4)OCC5=CNN=N5	0.9	22.4585	267.419	7.01253	1.24757	3.20262
2949	O=C(C1=CC=C(OC2=CC(C3=CC(OC)=C(S(=O)(O)=O)C=C3)=C(O)C=C2)C=C1)C4=CC=CC=C4	O=C(C1=CC=C(C2=CC=C(OC3=CC=CC=C3)C=C2)C=C1)C4=CC=CC=C4	0.9	21.5926	315.984	6.75019	1.42736	3.19882
2923	O=C(C1=CC=C(OC2=CC(C3=CC(OC)=C(S(=O)(O)=O)C=C3)=C(O)C=C2)C=C1)C4=CC=CC=C4	O=S(C1=CC=C(O)C=C1)(C2=CC=C(OC3=CC=CC=C3)C=C2)=O	0.9	21.4823	320.435	6.71799	1.43873	3.19772
304	O=S(C1=CC=CC(C2=CC=CC(S(=O)(O)=O)=C2)=C1)(O)=O	O=C(C1=CC=CC(C(C2=CC=C(OC3=CC=C(C(C)(C)C4=CC=C(O)C=C4)C=C3)C=C2)=O)=C1)C5=CC=CC=C5	0.5	17.5808	285.258	5.50052	1.15262	3.19621
122	OC1=C(S(=O)(O)=O)C=C(C=C(S(=O)(O)=O)C(OC2=CC=CC=C2C#N)=C3)C3=C1	O=C(C1=CC(C(C2=CC=CC=C2)=O)=CC=C1)C(C=C3)=CC=C3OC4=CC=C(O)C=C4	0.4	20.8165	292.782	6.51458	1.19947	3.19537
254	SC(C=C1)=CC=C1SC(C=C2)=CC=C2SC(C(S(=O)(O)=O)=C3)=CC=C3S(C4=CC(S(=O)(O)=O)=CC=C4)(=O)=O	SC1=CC(C=C2)=C(C=C1)C=C2SC3=C(C#N)C=CC=C3	0.5	19.5134	325.337	6.11569	1.18495	3.1907
3029	O=C(C1=CC=C(OC2=CC=C(S(=O)(O)=O)C=C2)C=C1)C3=CC=CC=C3	O=C(N1)C2=C(C(C1=O)=CC=C3C4=O)C3=C(C(N4C5=CC=C(OC6=CC=C(C7=CC=C(OC8=CC=CC=C8)C=C7)C=C6)C=C5)=O)C=C2	0.9	19.882	280.983	6.23595	1.16445	3.18829
9	O=S(C1=CC=CC=C1)(O)=O	O=C(C1=CC=C(C=C1)F)C2=CC=C(C=C2)OC3=CC=C(C=C3)C(C)(C4=CC=C(C=C4)O)C	0.3	18.4936	323.123	5.80064	1.27789	3.1882
2829	O=C(C1=CC=C(OC2=CC(C3=CC(OC)=C(S(=O)(O)=O)C=C3)=C(O)C=C2)C=C1)C4=CC=CC=C4	OC1=C(OC2=CC=C(C(C3=CC(C(C4=CC=CC=C4)=O)=CC=C3)=O)C=C2)C=C5C(C6C=CC5C6)=C1	0.9	20.8092	316.165	6.53061	1.42465	3.18641
512	O=C(C1=CC=C(OC2=CC=C(S(=O)(O)=O)C=C2)C=C1)C3=CC=CC=C3	O=P(C1=CC=C(OC2=CC=C(O)C=C2)C=C1)(C3=CC=CC=C3)C4=CC=CC=C4	0.6	17.784	328.816	5.58208	1.01626	3.18592
2907	O=C(C1=CC=C(OC2=CC(C3=CC(OC)=C(S(=O)(O)=O)C=C3)=C(O)C=C2)C=C1)C4=CC=CC=C4	OC1=CC=C(C(C2=CC=C(OC3=CC=C(C(C4=CC=CC=C4)=O)C=C3)C=C2)=O)C=C1	0.9	21.1709	318.555	6.6457	1.43521	3.18565
1746	OC1=CC=CC(OC2=CC=C(C=CC=C3)C3=C2)=C1C(C4=C(S(=O)(O)=O)C=CC=C4)=O	C1(C2=NC3=CC=C(C4=CC=C(NC=N5)C5=C4)C=C3N2)=CC=CC6=C1C=CC=C6	0.8	18.4456	281.98	5.79077	1.11145	3.18535
2879	O=C(C1=CC=C(OC2=CC(C3=CC(OC)=C(S(=O)(O)=O)C=C3)=C(O)C=C2)C=C1)C4=CC=CC=C4	O=C(C1=CC=C(CCCCCCCCCCCC)C=C1)C2=CC=CC=C2	0.9	22.1492	312.27	6.9594	1.41866	3.18263
2996	O=C(C1=CC=C(OC2=CC=C(S(=O)(O)=O)C=C2)C=C1)C3=CC=CC=C3	O=S(C1=CC=CC=C1)(C2=CC=C(C=C2)OC3=CC=C(C=C3)C4(C5=CC=C(C=C5)O)C6=C(C=CC=C6)C7=C4C=CC=C7)=O	0.9	20.2528	307.487	6.36795	1.15458	3.18042
2871	O=C(C1=CC=C(OC2=CC(C3=CC(OC)=C(S(=O)(O)=O)C=C3)=C(O)C=C2)C=C1)C4=CC=CC=C4	SC1=CC=C(SC2=CC=C(SC3=CC=C(S(C4=CC=CC=C4)(=O)=O)C=C3)C=C2)C=C1	0.9	21.2388	330.9	6.68262	1.43981	3.17822
834	O=S(C1=CC(C2=NC3=C(C=C(N=CS4)C4=C3)S2)=CC5=C(S(=O)(O)=O)C=CC=C51)(O)=O	FC(C(C1=CC=C(C2=NC3=CC4=C(N=CS4)C=C3S2)C=C1)(C(F)(F)F)C5=CC=CC=C5)(F)F	0.7	17.5944	366.235	5.53726	1.63704	3.17746
1190	OC1=CC(S(=O)(O)=O)=C(OC2=CC=CC=C2C#N)C=C1	O=C(C1=CC(C(C2=CC=CC=C2)=O)=CC=C1)C(C=C3)=CC=C3OC4=CC=C(C5=CC=C(O)C=C5)C=C4	0.7	18.1908	299.706	5.73454	1.49938	3.17215
143	O=S(C1=CC=C(O)C(S(=O)(O)=O)=C1)(C2=CC=C(OC3=CC=CC=C3)C(S(=O)(O)=O)=C2)=O	O=C(C1=CC(C(C2=CC=CC=C2)=O)=CC=C1)C(C=C3)=CC=C3OC4=CC=C(O)C=C4	0.4	17.8033	312.509	5.61505	1.04513	3.17065
3065	O=C(C1=CC=C(OC2=CC=C(S(=O)(O)=O)C=C2)C=C1)C3=CC=CC=C3	O=C(C1=CC=CC(C(C2=CC=C(OC3=CC=C(C(C)(C)C4=CC=C(O)C=C4)C=C3)C=C2)=O)=C1)C5=CC=CC=C5	0.9	21.8183	309.894	6.8828	1.18172	3.16998
48	C=C(C1=CC=C(C(S(=O)(O)=O)=C1)F)C2=CC=C(C(S(=O)(O)=O)=C2)OC3=CC=C(C=C3)C4=CC=C(C=C4)OC5=CC=C(C=C5S(=O)(O)=O)C(C6=CC=C(C(S(=O)(O)=O)=C6)F)=C	O=C(C1=CC(C(C2=CC=CC=C2)=O)=CC=C1)C(C=C3)=CC=C3OC4=CC=C(O)C=C4	0.4	18.445	307.263	5.82484	1.33743	3.16661
3016	O=C(C1=CC=C(OC2=CC=C(S(=O)(O)=O)C=C2)C=C1)C3=CC=CC=C3	O=C(C1=CC=C(OC2=CC=C(C(C3=CC=CC=C3C(O)=O)C4=CC=C(O)C=C4)C=C2)C=C1)C5=CC=CC=C5	0.9	21.3055	311.419	6.72897	1.16954	3.16624
2989	O=C(C1=CC=C(OC2=CC=C(S(=O)(O)=O)C=C2)C=C1)C3=CC=CC=C3	OC1=CC=C(C2(C3=CC=CC=C3C4=CC=CC=C42)C5=CC=C(OC6=CC=C(P(C7=CC=CC=C7)(C8=CC=CC=C8)=O)C=C6)C=C5)C=C1	0.9	19.4873	307.956	6.15951	1.15454	3.16377
515	O=C(C1=CC=C(OC2=CC=C(S(=O)(O)=O)C=C2)C=C1)C3=CC=CC=C3	O=S(C1=CC=CC=C1)(C2=CC=C(OC3=CC=C(O)C=C3)C=C2)=O	0.6	18.693	331.176	5.91104	1.11336	3.16238
2890	O=C(C1=CC=C(OC2=CC(C3=CC(OC)=C(S(=O)(O)=O)C=C3)=C(O)C=C2)C=C1)C4=CC=CC=C4	O=S(C1=CC=C(O)C=C1)(C2=CC=C(OC3=CC=C(C=CC=C4)C4=C3)C=C2)=O	0.9	21.7063	318.224	6.86399	1.43283	3.16235
1029	OC1=CC=CC(OC2=CC=C(C=CC=C3)C3=C2)=C1C(C4=C(S(=O)(O)=O)C=CC=C4)=O	O=C(NC1=O)C2=CC=C3C4=C2C1=CC=C4C(N(C5=CC6=C(NC7=C6C=C(C)C=C7)C=C5)C3=O)=O	0.7	17.9512	274.615	5.68012	1.14502	3.16036
2891	O=C(C1=CC=C(OC2=CC(C3=CC(OC)=C(S(=O)(O)=O)C=C3)=C(O)C=C2)C=C1)C4=CC=CC=C4	O=P(C1=CC=C(OC2=CC=C(O)C=C2)C=C1)(C3=CC=CC=C3)C4=CC=CC=C4	0.9	21.3258	320.936	6.74888	1.43114	3.1599
1150	OC1=CC(C=C(S(=O)(O)=O)C=C2)=C2C=C1OC3=CC=CC=C3C#N	O=C(C1=CC=CC=C1)C2=CC=C(C(C3=CC=CC=C3)=O)C=C2	0.7	19.1	293.324	6.05303	1.13415	3.15545
1677	O=C(C1=CC=C(OC2=CC=C(S(=O)(O)=O)C=C2)C=C1)C3=CC=CC=C3	OC1=CC=C(C(C(C=C2)=CC=C2OC(C=C3)=CC=C3C(CCC(O)=O)(C)C4=CC=CC=C4)=O)C=C1	0.8	21.6258	312.653	6.85591	1.14676	3.15433
1152	OC1=CC(C=C(S(=O)(O)=O)C=C2)=C2C=C1OC3=CC=CC=C3C#N	O=C(C1=CC(C(C2=CC=CC=C2)=O)=CC=C1)C(C=C3)=CC=C3OC4=CC=C(O)C=C4	0.7	18.6191	304.743	5.90712	1.1417	3.15197
1020	OC1=CC=CC(OC2=CC=C(C=CC=C3)C3=C2)=C1C(C4=C(S(=O)(O)=O)C=CC=C4)=O	O=S(C1=CC=CC=C1)(C2=CC=C(OC3=CC=C(O)C(C(C)(C)C)=C3)C=C2)=O	0.7	17.6879	311.951	5.61265	1.22544	3.15143
933	O=C(C1=CC=C(OC2=CC=C(S(=O)(O)=O)C=C2)C=C1)C3=CC=CC=C3	O=S(C(C=C1)=CC=C1OC(C=C2)=CC=C2C3=CC=C(O)C=C3)(C4=CC=CC=C4)=O	0.7	19.3146	322.636	6.13151	1.12669	3.15005
300	O=S(C1=CC=CC(C2=CC=CC(S(=O)(O)=O)=C2)=C1)(O)=O	OC1=C(OC2=CC=C(C(C3=CC(C(C4=CC=CC=C4)=O)=CC=C3)=O)C=C2)C=C5C(C6C=CC5C6)=C1	0.5	17.7998	287.57	5.65088	1.18028	3.14992
1555	O=C(C1=CC=C(OC2=CC(C3=CC(OC)=C(S(=O)(O)=O)C=C3)=C(O)C=C2)C=C1)C4=CC=CC=C4	O=C(NC1=O)C2=CC=C3C4=C2C1=CC=C4C(N(C5=NC=NN5)C3=O)=O	0.8	18.8683	273.714	5.99318	1.41531	3.1483
2902	O=C(C1=CC=C(OC2=CC(C3=CC(OC)=C(S(=O)(O)=O)C=C3)=C(O)C=C2)C=C1)C4=CC=CC=C4	O=S(C1=CC=C(OC2=CC=CC=C2C3=CC=C(F)C=C3)C=C1)(C4=CC=C(O)C=C4)=O	0.9	21.5008	321.915	6.83294	1.43966	3.14664
1345	O=C(C1=CC=C(OC2=CC=C(P(C3=CC=C(O)C=C3)(C4=CC=CC=C4)=O)C=C2)C(S(=O)(O)=O)=C1)C5=CC(S(=O)(O)=O)=CC=C5	O=C(NC1=O)C2=C(C1=CC=C3)C3=C(C4=C(C=CC=C5C(N(C6=CC=C(N(C7=CC=CC=C7)C8=CC=CC=C8)C=C6)C9=O)=O)C5=C9C=C4)C=C2	0.8	18.8591	284.389	5.99454	1.13741	3.14605
641	OC1=CC(C=C(S(=O)(O)=O)C=C2)=C2C=C1OC3=CC=CC=C3C#N	OC1=CC=C(C(C2=CC=C(OC3=CC=C(C(C4=CC=CC=C4)=O)C=C3)C=C2)=O)C=C1	0.6	18.8249	308.426	5.98413	1.15376	3.14581
1616	O=C(C1=CC=C(OC2=CC=C(S(=O)(O)=O)C=C2)C=C1)C3=CC=CC=C3	O=S(C(C=C1)=CC=C1OC2=CC=C(C3=CC(C4=CC=CC=C4)=CC=C3)C=C2)(C5=CC=C(OC6=CC=C(C7=CC=CC(C8=CC=C(O)C=C8)=C7)C=C6)C=C5)=O	0.8	18.1859	321.276	5.78173	1.32718	3.1454
961	O=C(C1=CC=C(OC2=CC=C(S(=O)(O)=O)C=C2)C=C1)C3=CC=CC=C3	O=P(C1=CC=C(OC2=CC=C(O)C=C2)C=C1)(C3=CC=CC=C3)C4=CC=CC=C4	0.7	19.0697	316.37	6.06643	1.03386	3.14347
2894	O=C(C1=CC=C(OC2=CC(C3=CC(OC)=C(S(=O)(O)=O)C=C3)=C(O)C=C2)C=C1)C4=CC=CC=C4	O=S(C1=CC=CC=C1)(C2=CC=C(OC3=CC=C(O)C=C3)C=C2)=O	0.9	21.1533	322.561	6.73031	1.43537	3.14299
614	O=S(C1=CC=CC(C2=CC=CC(S(=O)(O)=O)=C2)=C1)(O)=O	O=C(C1=CC(C(C2=CC=CC=C2)=O)=CC=C1)C(C=C3)=CC=C3OC4=CC=C(C5=CC=C(O)C=C5)C=C4	0.6	18.0475	267.422	5.74225	1.15804	3.14292
2843	O=C(C1=CC=C(OC2=CC(C3=CC(OC)=C(S(=O)(O)=O)C=C3)=C(O)C=C2)C=C1)C4=CC=CC=C4	O=C(C1=CC=C(C(C2=CC=C(OC3=CC=C(O)C(C(C)(C)C)=C3)C=C2)=O)C=C1)C4=CC=CC=C4	0.9	21.267	318.268	6.76834	1.42953	3.14213
2939	O=C(C1=CC=C(OC2=CC(C3=CC(OC)=C(S(=O)(O)=O)C=C3)=C(O)C=C2)C=C1)C4=CC=CC=C4	O=CC1=CC=CC(C(NC2=CC=CC(C(C(F)(F)F)(C(F)(F)F)C3=CC=C(N)C=C3)=C2)=O)=C1	0.9	21.7983	312.116	6.93858	1.41699	3.14161
615	O=S(C1=CC=CC(C2=CC=CC(S(=O)(O)=O)=C2)=C1)(O)=O	SC1=CC(C=C2)=C(C=C1)C=C2SC3=C(C#N)C=CC=C3	0.6	18.5367	285.357	5.90086	1.27976	3.14136
2904	O=C(C1=CC=C(OC2=CC(C3=CC(OC)=C(S(=O)(O)=O)C=C3)=C(O)C=C2)C=C1)C4=CC=CC=C4	CC(C)(C1=CC=C(OCC2=CN(CC3=CC=CC=C3)N=N2)C=C1)C4=CC=C(C=C4)OCC5=CNN=N5	0.9	20.6678	302.512	6.57956	1.51856	3.14122
673	O=S(C1=CC=CC(S(=O)(O)=O)=C1)(C2=CC(S(=O)(O)=O)=C(SC3=CC(C=CC(S)=C4)=C4C=C3)C=C2)=O	SC(C=C1)=CC=C1SC(C=C2)=CC=C2SC3=C(C#N)C=CC=C3	0.6	18.3298	336.774	5.83719	1.15641	3.14017
2911	O=C(C1=CC=C(OC2=CC(C3=CC(OC)=C(S(=O)(O)=O)C=C3)=C(O)C=C2)C=C1)C4=CC=CC=C4	OC1=CC=C(C(C(C=C2)=CC=C2OC(C=C3)=CC=C3C(CCC(O)=O)(C)C4=CC=CC=C4)=O)C=C1	0.9	21.3864	316.565	6.81273	1.44122	3.13918
1951	OC1=CC(C=C(S(=O)(O)=O)C=C2)=C2C=C1OC3=CC=CC=C3C#N	CCCCCCN(C1=O)C(C2=CC=CC(C2=C1C=C3)=C3C4=C5C(C6=CC=C5)=C(C(NC6=O)=O)C=C4)=O	0.8	17.9496	270.267	5.71947	1.2717	3.13834
3055	O=C(C1=CC=C(OC2=CC=C(S(=O)(O)=O)C=C2)C=C1)C3=CC=CC=C3	O=P(C1=CC=C(SC2=CC=C(C(C(F)(F)F)(C(F)(F)F)C3=CC=C(S)C=C3)C=C2)C=C1)(C4=CC=CC=C4)C5=CC=CC=C5	0.9	20.2093	278.31	6.44074	1.15905	3.13773
1639	O=C(C1=CC=C(OC2=CC=C(S(=O)(O)=O)C=C2)C=C1)C3=CC=CC=C3	O=S(C1=CC=CC=C1)(C2=CC=C(OC3=CC=C(O)C(C(C)(C)C)=C3)C=C2)=O	0.8	21.4413	313.039	6.83408	1.14725	3.1374
2995	O=C(C1=CC=C(OC2=CC=C(S(=O)(O)=O)C=C2)C=C1)C3=CC=CC=C3	O=S(C1=CC=CC=C1)(C2=CC=C(C=C2)OC3=CC=C(C=C3)C(C4=CC=CC=C4)(C5=CC=CC=C5)C6=CC=C(C=C6)O)=O	0.9	20.1993	310.864	6.43964	1.15407	3.13672
1634	O=C(C1=CC=C(OC2=CC=C(S(=O)(O)=O)C=C2)C=C1)C3=CC=CC=C3	CC(C)(C1=CC=C(OC2=CC=C(S(C3=CC=CC=C3)(=O)=O)C=C2)C=C1)C4=CC=C(O)C=C4	0.8	21.0952	315.278	6.72585	1.14966	3.13643
1018	OC1=CC=CC(OC2=CC=C(C=CC=C3)C3=C2)=C1C(C4=C(S(=O)(O)=O)C=CC=C4)=O	CC(C)(C1=CC=C(OC2=CC=C(S(C3=CC=CC=C3)(=O)=O)C=C2)C=C1)C4=CC=C(O)C=C4	0.7	17.8565	319.195	5.69328	1.22345	3.13642
2918	O=C(C1=CC=C(OC2=CC(C3=CC(OC)=C(S(=O)(O)=O)C=C3)=C(O)C=C2)C=C1)C4=CC=CC=C4	O=C(C1=CC=CC=C1)C2=CC=CC=C2	0.9	21.2164	312.827	6.7647	1.41035	3.13635
679	OC1=CC(S(=O)(O)=O)=C(OC2=CC=CC=C2C#N)C=C1	O=C(C1=CC=CC=C1)C2=CC=C(C(C3=CC=CC=C3)=O)C=C2	0.6	19.6629	284.093	6.26946	1.27396	3.13629
1044	OC1=CC=CC(OC2=CC=C(C=CC=C3)C3=C2)=C1C(C4=C(S(=O)(O)=O)C=CC=C4)=O	O=S(C1=CC=C(S(=O)(O)=O)C=C1)(O)=O	0.7	19.1588	293.773	6.10906	0.940915	3.13612
2859	O=C(C1=CC=C(OC2=CC(C3=CC(OC)=C(S(=O)(O)=O)C=C3)=C(O)C=C2)C=C1)C4=CC=CC=C4	O=S(C1=CC=CC=C1)(C2=CC=C(OC3=CC=C(O)C(C(C)(C)C)=C3)C=C2)=O	0.9	21.2667	320.516	6.7828	1.42415	3.13538
4	O=S(C1=CC=CC=C1)(O)=O	O=C(C1=CC(C(C2=CC=CC=C2)=O)=CC=C1)C(C=C3)=CC=C3OC4=CC=C(O)C=C4	0.2	17.9012	348.614	5.71607	1.24289	3.13173
500	O=C(C1=CC=C(OC2=CC=C(S(=O)(O)=O)C=C2)C=C1)C3=CC=CC=C3	O=C(C1=CC=C(C=C1)F)C2=CC=C(C=C2)OC3=CC=C(C=C3)C(C)(C4=CC=C(C=C4)O)C	0.6	19.3801	322.318	6.19809	1.25871	3.12679
2887	O=C(C1=CC=C(OC2=CC(C3=CC(OC)=C(S(=O)(O)=O)C=C3)=C(O)C=C2)C=C1)C4=CC=CC=C4	OC(C=C1)=CC=C1C(C(F)(F)F)(C(F)(F)F)C(C=C2)=CC=C2OC3=CC=C(C(C4=CC=CC=C4)=O)C=C3	0.9	21.1116	319.587	6.75384	1.43551	3.12587
66	O=S(C1=CC=CC=C1)(O)=O	O=C(C1=CC(C(C2=CC=CC=C2)=O)=CC=C1)C(C=C3)=CC=C3OC4=CC=C(C5=CC=C(O)C=C5)C=C4	0.4	17.7941	316.753	5.69289	1.25475	3.12566
2804	O=C(C1=CC=C(OC2=CC(C3=CC(OC)=C(S(=O)(O)=O)C=C3)=C(O)C=C2)C=C1)C4=CC=CC=C4	O=S(C1=CC=CC=C1)(C2=CC=C(OC3=CC=C(O)C(C4=CC(F)=C(F)C=C4)=C3)C=C2)=O	0.9	21.5533	321.637	6.90387	1.42414	3.12191
1987	OC1=CC(S(=O)(O)=O)=C(OC2=CC=CC=C2C#N)C=C1	O=C(C1=C2C(C=CC=C23)=CC=C1)N(C4=CC=CC(C(C5=CC=CC=C5)=O)=C4)C3=O	0.8	18.1011	275.315	5.80116	1.32943	3.12025
1791	OC1=CC=CC(OC2=CC=C(C=CC=C3)C3=C2)=C1C(C4=C(S(=O)(O)=O)C=CC=C4)=O	O=C(C1=CC=CC(C=O)=C1)NC(C=C2)=CC=C2OC3=C(C#N)C(OC4=CC=C(N)C=C4)=CC=C3	0.8	20.3861	297.818	6.53558	1.18968	3.11924
930	O=C(C1=CC=C(OC2=CC=C(S(=O)(O)=O)C=C2)C=C1)C3=CC=CC=C3	O=C(C1=CC=C(C=C1)F)C2=CC=C(C=C2)OC3=CC=C(C=C3)C(C)(C4=CC=C(C=C4)O)C	0.7	20.7099	318.068	6.63987	1.2319	3.11902
504	O=C(C1=CC=C(OC2=CC=C(S(=O)(O)=O)C=C2)C=C1)C3=CC=CC=C3	O=S(C1=CC=CC=C1)(C2=CC=C(OC3=CC=C(C=CC(O)=C4)C4=C3)C=C2)=O	0.6	18.48	328.328	5.92582	1.01805	3.11856
2994	O=C(C1=CC=C(OC2=CC=C(S(=O)(O)=O)C=C2)C=C1)C3=CC=CC=C3	O=S(C1=CC=CC=C1)(C2=CC=C(C=C2)OC3=CC=C(C=C3C4=CC=CC=C4)C(C)(C5=CC=C(C(C6=CC=CC=C6)=C5)O)C)=O	0.9	20.3278	310.853	6.52644	1.18865	3.11469
2812	O=C(C1=CC=C(OC2=CC(C3=CC(OC)=C(S(=O)(O)=O)C=C3)=C(O)C=C2)C=C1)C4=CC=CC=C4	O=C(C1=CC=C(F)C=C1)C(C=C2)=CC=C2OC(C=C3)=CC=C3C(C(F)(F)F)(C(F)(F)F)C4=CC=CC=C4	0.9	21.0531	315.389	6.76073	1.39369	3.11402
2899	O=C(C1=CC=C(OC2=CC(C3=CC(OC)=C(S(=O)(O)=O)C=C3)=C(O)C=C2)C=C1)C4=CC=CC=C4	O=C(C1=CC=CC=C1)C2=CC=C(C(C3=CC=CC=C3)=O)C=C2	0.9	20.7977	309.827	6.68407	1.41663	3.11154
470	C=C(C1=CC(S(=O)(O)=O)=CC=C1)C2=CC=CC=C2	O=C(C1=CC(C(C2=CC=CC=C2)=O)=CC=C1)C(C=C3)=CC=C3OC4=CC=C(C5=CC=C(O)C=C5)C=C4	0.6	17.7654	279.403	5.71241	1.23775	3.10996
1792	OC1=CC=CC(OC2=CC=C(C=CC=C3)C3=C2)=C1C(C4=C(S(=O)(O)=O)C=CC=C4)=O	O=C(C1=CC=CC=C1)C2=CC=C(C(C3=CC=CC=C3)=O)C=C2	0.8	20.2945	306.671	6.5286	1.0563	3.10856
307	O=S(C1=CC=CC(C2=CC=CC(S(=O)(O)=O)=C2)=C1)(O)=O	SC1=CC(C=C2)=C(C=C1)C=C2SC3=C(C#N)C=CC=C3	0.5	18.4997	292.535	5.95297	1.33058	3.10765
47	C=C(C1=CC=C(C(S(=O)(O)=O)=C1)F)C2=CC=C(C(S(=O)(O)=O)=C2)OC3=CC=C(C=C3)C4=CC=C(C=C4)OC5=CC=C(C=C5S(=O)(O)=O)C(C6=CC=C(C(S(=O)(O)=O)=C6)F)=C	O=C(C1=CC(C(C2=CC=CC=C2)=O)=CC=C1)C(C=C3)=CC=C3OC4=CC=C(C5=CC=C(O)C=C5)C=C4	0.4	17.9988	307.669	5.79282	1.31789	3.10708
1806	OC1=CC=CC(OC2=CC=C(C=CC=C3)C3=C2)=C1C(C4=C(S(=O)(O)=O)C=CC=C4)=O	O=C(C1=C2C(C=CC=C23)=CC=C1)N(C4=CC=CC(C(C5=CC=CC=C5)=O)=C4)C3=O	0.8	20.2082	292.542	6.50431	1.04809	3.10689
2849	O=C(C1=CC=C(OC2=CC(C3=CC(OC)=C(S(=O)(O)=O)C=C3)=C(O)C=C2)C=C1)C4=CC=CC=C4	CC(C1=CC=CC=C1)(C(F)(F)F)C2=CC=C(C3=NC4=C(C=C(N=CS5)C5=C4)S3)C=C2	0.9	21.0559	308.509	6.78078	1.42636	3.10522
2805	O=C(C1=CC=C(OC2=CC(C3=CC(OC)=C(S(=O)(O)=O)C=C3)=C(O)C=C2)C=C1)C4=CC=CC=C4	O=S(C1=CC=C(O)C=C1)(C2=CC=C(OC3=CC=C(C(C(F)(F)F)(C(F)(F)F)C4=CC=CC=C4)C=C3)C=C2)=O	0.9	21.189	320.377	6.82607	1.44834	3.10413
1648	O=C(C1=CC=C(OC2=CC=C(S(=O)(O)=O)C=C2)C=C1)C3=CC=CC=C3	OC(C=C1)=CC=C1C2=CC=C(OC3=CC(N=C4C5=CC=CC=C5)=C(C=C3)N=C4C6=CC=C(OC7=NC8=C(N=C7C9=CC=CC=C9)C=CC=C8)C=C6)C=C2	0.8	17.6287	301.276	5.683	1.36975	3.10201
3001	O=C(C1=CC=C(OC2=CC=C(S(=O)(O)=O)C=C2)C=C1)C3=CC=CC=C3	OC1=C(F)C(F)=C(C2=C(F)C(F)=C(OC3=CC=C(C(C(F)(F)F)(C(F)(F)F)C4=CC=CC=C4)C=C3)C(F)=C2F)C(F)=C1F	0.9	20.653	312.344	6.65911	1.26168	3.10146
1649	O=C(C1=CC=C(OC2=CC=C(S(=O)(O)=O)C=C2)C=C1)C3=CC=CC=C3	OC(C=C1)=CC=C1C(C)(C)C(C=C2)=CC=C2OC3=CC=C(C(C4=CC=CC=C4)=O)C=C3	0.8	21.7375	316.305	7.01897	1.18081	3.09696
248	CCC1=CC=C(OCCCCS(=O)(O)=O)C=C1	O=C(C1=CC=C(C(C2=CC=C(OC3=CC=C(O)C(C(C)(C)C)=C3)C=C2)=O)C=C1)C4=CC=CC=C4	0.5	18.0319	312.729	5.83185	1.21825	3.09197
2928	O=C(C1=CC=C(OC2=CC(C3=CC(OC)=C(S(=O)(O)=O)C=C3)=C(O)C=C2)C=C1)C4=CC=CC=C4	OC1=CC=C(C2=CC=C(C3=CC=CC=C3C#N)C=C2)C=C1	0.9	21.5482	317.584	6.97104	1.49354	3.0911
799	O=C(C1=CC=C(OC2=CC=C(P(C3=CC=C(O)C=C3)(C4=CC=CC=C4)=O)C=C2)C(S(=O)(O)=O)=C1)C5=CC(S(=O)(O)=O)=CC=C5	O=C(N1)C2=C(C(C1=O)=CC=C3C4=O)C3=C(C(N4C5=CC=C(OC6=CC=C(C7=CC=C(OC8=CC=CC=C8)C=C7)C=C6)C=C5)=O)C=C2	0.7	17.6074	302.195	5.69815	1.19743	3.09002
2893	O=C(C1=CC=C(OC2=CC(C3=CC(OC)=C(S(=O)(O)=O)C=C3)=C(O)C=C2)C=C1)C4=CC=CC=C4	O=S(C1=CC=CC=C1)(C2=CC=C(OC3=CC=C(O)C(C4=CC=CC=C4)=C3)C=C2)=O	0.9	21.1261	322.272	6.83721	1.42088	3.08987
2903	O=C(C1=CC=C(OC2=CC(C3=CC(OC)=C(S(=O)(O)=O)C=C3)=C(O)C=C2)C=C1)C4=CC=CC=C4	OC1=CC=C(S(=O)(C2=CC=C(OC3=CC=C(S(C4=CC=CC=C4)(=O)=O)C=C3)C=C2)=O)C=C1	0.9	21.7881	322.052	7.05597	1.43135	3.08789
634	OC1=CC2=C(C=C(S(=O)(O)=O)C=C2OC3=CC=CC=C3C#N)C=C1	O=C(C1=CC=CC=C1)C2=CC=C(C(C3=CC=CC=C3)=O)C=C2	0.6	19.1963	285.977	6.2211	1.14097	3.08568
2826	O=C(C1=CC=C(OC2=CC(C3=CC(OC)=C(S(=O)(O)=O)C=C3)=C(O)C=C2)C=C1)C4=CC=CC=C4	OC1=CC=C(C(C(F)(F)F)(C(F)(F)F)C2=CC=C(OC3=CC=C(S(C4=CC=CC=C4)(=O)=O)C=C3)C=C2)C=C1	0.9	20.952	319.984	6.79074	1.44823	3.08538
2896	O=C(C1=CC=C(OC2=CC(C3=CC(OC)=C(S(=O)(O)=O)C=C3)=C(O)C=C2)C=C1)C4=CC=CC=C4	OC(C=C1)=CC=C1C(C=C2)=CC=C2OC3=C(C#N)C=CC=C3	0.9	21.3027	318.569	6.90593	1.50151	3.0847
1442	O=C(C1=CC=C(OC2=CC=C(P(C3=CC=C(O)C=C3)(C4=CC=CC=C4)=O)C=C2)C(S(=O)(O)=O)=C1)C5=CC(S(=O)(O)=O)=CC=C5	SC1=CC(C=C2)=C(C=C1)C=C2SC3=C(C#N)C=CC=C3	0.8	18.4054	334.799	5.97063	1.07318	3.08266
1730	O=C(NC1=O)C2=CC=C3C4=C2C1=CC=C4C(N(C5=CC=C(OC6=CC(C=C(OC7=CC=CC=C7)C(S(=O)(O)=O)=C8)=C8C=C6S(=O)(O)=O)C=C5)C3=O)=O	N#CC1=C(C2=CC=C(OC3=CC=CC=C3)C=C2)C=CC=C1	0.8	19.0551	294.425	6.18167	1.13372	3.08251
228	O=C(C1=CC(S(=O)(O)=O)=CC=C1)C2=CC=CC=C2	OC1=CC=C(C(C(C=C2)=CC=C2OC(C=C3)=CC=C3C(CCC(O)=O)(C)C4=CC=CC=C4)=O)C=C1	0.5	18.2964	293.405	5.93905	1.21597	3.0807
503	O=C(C1=CC=C(OC2=CC=C(S(=O)(O)=O)C=C2)C=C1)C3=CC=CC=C3	O=S(C1=CC=C(O)C=C1)(C2=CC=C(OC3=CC=C(C(C4=CC=CC=C4)=O)C=C3)C=C2)=O	0.6	19.583	317.76	6.36083	1.08945	3.07868
2848	O=C(C1=CC=C(OC2=CC(C3=CC(OC)=C(S(=O)(O)=O)C=C3)=C(O)C=C2)C=C1)C4=CC=CC=C4	O=S(C1=C(C2=NC3=C(C=C(N=CS4)C4=C3)S2)C=CC=C1)(C5=CC=CC=C5)=O	0.9	20.697	306.765	6.72802	1.41094	3.07625
2895	O=C(C1=CC=C(OC2=CC(C3=CC(OC)=C(S(=O)(O)=O)C=C3)=C(O)C=C2)C=C1)C4=CC=CC=C4	O=S(C1=CC=CC=C1)(C2=CC=C(OC3=CC=C(O)C(C4=CC=C(F)C=C4)=C3)C=C2)=O	0.9	21.0744	323.561	6.85257	1.42205	3.0754
1618	O=C(C1=CC=C(OC2=CC=C(S(=O)(O)=O)C=C2)C=C1)C3=CC=CC=C3	OC1=CC=C(C2=CC=C(OC3=CC=C(S(=O)(C4=CC=C(OC5=CC=C(C6=CC=C(O)C=C6)C=C5)C=C4)=O)C=C3)C=C2)C=C1	0.8	18.3748	321.128	5.97619	1.16359	3.07467
2889	O=C(C1=CC=C(OC2=CC(C3=CC(OC)=C(S(=O)(O)=O)C=C3)=C(O)C=C2)C=C1)C4=CC=CC=C4	OC1=CC=CC(OC2=CC=C(C=CC=C3)C3=C2)=C1C#N	0.9	21.2068	315.904	6.8977	1.40759	3.07448
13	O=S(C1=CC=CC=C1)(O)=O	O=C(C1=CC(C2=C(OC)C=CC=C2)=C(OC)C=C1)C(C=C3)=CC=C3OC4=CC=C(C(O)=O)C=C4	0.3	19.2448	275.085	6.2638	1.45046	3.07238
2868	O=C(C1=CC=C(OC2=CC(C3=CC(OC)=C(S(=O)(O)=O)C=C3)=C(O)C=C2)C=C1)C4=CC=CC=C4	OC(C=C1)=CC=C1C2=CC=C(OC3=CC(N=C4C5=CC=CC=C5)=C(C=C3)N=C4C(C=C6)=CC=C6C7=NC8=C(N=C7C9=CC=CC=C9)C=CC=C8)C=C2	0.9	18.6217	309.016	6.06633	1.36712	3.06969
2839	O=C(C1=CC=C(OC2=CC(C3=CC(OC)=C(S(=O)(O)=O)C=C3)=C(O)C=C2)C=C1)C4=CC=CC=C4	OC1=CC=C(OC2=CC=C(OC3=CC=C(S(C4=CC=CC=C4)(=O)=O)C=C3)C=C2)C=C1	0.9	20.4314	325.125	6.65814	1.44604	3.06864
3098	O=C(C1=CC=C(OC2=CC=C(S(=O)(O)=O)C=C2)C=C1)C3=CC=CC=C3	O=C(NC1=O)C2=C(C1=CC=C3C(N(C4=CC=C(OC5=CC=C(P(C6=CC=C(OC7=CC=CC=C7)C=C6)(C8=CC=CC=C8)=O)C=C5)C=C4)C9=O)=O)C3=C9C=C2	0.9	19.6014	281.444	6.38771	1.18242	3.06862
3017	O=C(C1=CC=C(OC2=CC=C(S(=O)(O)=O)C=C2)C=C1)C3=CC=CC=C3	O=C(C1=CC=C(OC2=CC=C(C(C3=CC=CC=C3C4=NC(C=CC=C5)=C5N4)C6=CC=C(O)C=C6)C=C2)C=C1)C7=CC=CC=C7	0.9	20.0508	304.91	6.53587	1.18574	3.0678
1108	O=S(C1=CC(S(=O)(O)=O)=C(OC2=CC=CC=C2C3=CC=C(F)C=C3)C=C1)(C4=CC=C(O)C(S(=O)(O)=O)=C4)=O	O=C(NC1=O)C2=C(C1=CC=C3)C3=C(C4=C(C=CC=C5C(N(C6=CC=C(OC7=CC=CC=C7)C=C6)C8=O)=O)C5=C8C=C4)C=C2	0.7	18.306	266.755	5.96728	0.949427	3.06773
2857	O=C(C1=CC=C(OC2=CC(C3=CC(OC)=C(S(=O)(O)=O)C=C3)=C(O)C=C2)C=C1)C4=CC=CC=C4	O=C(C1=CC=CC2=C1C3=CC=C2)N(NC4=CC=C(CC5=CC=C(NN(C6=O)C(C7=C(C6=CC=C8)C8=CC=C7)=O)C(C)=C5)C=C4C)C3=O	0.9	18.2172	296.484	5.93993	1.36069	3.06691
367	O=S(C1=CC=CC=C1)(O)=O	O=C(C1=CC(C(C2=CC=CC=C2)=O)=CC=C1)C(C=C3)=CC=C3OC4=CC=C(C5=CC=C(O)C=C5)C=C4	0.6	18.2521	274.983	5.95659	1.3233	3.06419
1658	O=C(C1=CC=C(OC2=CC=C(S(=O)(O)=O)C=C2)C=C1)C3=CC=CC=C3	OC(C=C1)=CC=C1C(C(F)(F)F)(C(F)(F)F)C(C=C2)=CC=C2OC3=CC=C(C(C4=CC=CC=C4)=O)C=C3	0.8	20.8035	317.037	6.79274	1.1681	3.06261
440	O=C(C1=CC(S(=O)(O)=O)=CC=C1)C2=CC=CC=C2	OC(C=C1)=CC=C1C(C(F)(F)F)(C(F)(F)F)C(C=C2)=CC=C2OC3=CC=C(C(C4=CC=CC=C4)=O)C=C3	0.6	18.1301	266.505	5.92234	1.32249	3.0613
2930	O=C(C1=CC=C(OC2=CC(C3=CC(OC)=C(S(=O)(O)=O)C=C3)=C(O)C=C2)C=C1)C4=CC=CC=C4	N=P(OC1=CC=C(F)C=C1)OC2=CC=C(OC)C=C2	0.9	20.4277	319.821	6.67434	1.42463	3.06063
2948	O=C(C1=CC=C(OC2=CC(C3=CC(OC)=C(S(=O)(O)=O)C=C3)=C(O)C=C2)C=C1)C4=CC=CC=C4	OC1=CC=C(C(C2=C(C(O)=O)C=CC=C2)C3=CC=C(OC4=CC=CC=C4C#N)C=C3)C=C1	0.9	20.7268	315.577	6.77646	1.44968	3.05865
940	O=C(C1=CC=C(OC2=CC=C(S(=O)(O)=O)C=C2)C=C1)C3=CC=CC=C3	OC1=CC=C(OC2=CC=C(OC3=CC=C(S(C4=CC=CC=C4)(=O)=O)C=C3)C=C2)C=C1	0.7	18.9677	327.75	6.20499	1.149	3.05685
2855	O=C(C1=CC=C(OC2=CC(C3=CC(OC)=C(S(=O)(O)=O)C=C3)=C(O)C=C2)C=C1)C4=CC=CC=C4	O=C(C1=CC=CC2=C1C3=CC=C2)N(NC4=CC=C(CC5=CC=C(NN(C6=O)C(C7=C(C6=CC=C8)C8=CC=C7)=O)C=C5)C=C4)C3=O	0.9	18.044	297.572	5.90471	1.42123	3.05587
1613	O=C(C1=CC=C(OC2=CC=C(S(=O)(O)=O)C=C2)C=C1)C3=CC=CC=C3	FC1=C(O)C(F)=C(F)C(C2=C(F)C(F)=C(OC3=CC=C(C4=CC=C(O)C=C4)C=C3)C(F)=C2F)=C1F	0.8	19.7556	320.277	6.4654	1.18174	3.05558
2810	O=C(C1=CC=C(OC2=CC(C3=CC(OC)=C(S(=O)(O)=O)C=C3)=C(O)C=C2)C=C1)C4=CC=CC=C4	O=C(C1=CC=C(OC2=CC=C(C(C)(C)C3=CC=CC=C3)C=C2)C=C1)C(C=C4)=CC=C4OC5=CC=C(C(C)(C)C6=CC=C(O)C=C6)C=C5	0.9	18.9139	321.212	6.19374	1.44051	3.05372
2858	O=C(C1=CC=C(OC2=CC(C3=CC(OC)=C(S(=O)(O)=O)C=C3)=C(O)C=C2)C=C1)C4=CC=CC=C4	O=C(C1=CC=C(C(C2=CC=C(O)C=C2)=O)C=C1)C3=CC=C(OC4=CC=C(C=C4)C(C(F)(F)F)(C(F)(F)F)C5=CC=CC=C5)C=C3	0.9	19.3698	316.999	6.34372	1.39614	3.05339
988	O=C(C1=CC=C(OC2=CC=C(S(=O)(O)=O)C=C2)C=C1)C3=CC=CC=C3	OC1=CC=C(C(C2=C(C(O)=O)C=CC=C2)C3=CC=C(OC4=CC=CC=C4C#N)C=C3)C=C1	0.7	18.9029	301.953	6.2044	1.24441	3.04669
3077	O=C(C1=CC=C(OC2=CC=C(S(=O)(O)=O)C=C2)C=C1)C3=CC=CC=C3	O=C1C(C=CC=C2)=C2C(C(C=C3)=CC=C3OC(C=C4)=CC=C4C(N5)=NC(C5=C6)=CC=C6C7=CC(N=CN8)=C8C=C7)=NN1C9=CC=CC=C9	0.9	19.6379	270.622	6.44645	1.13466	3.04631
2925	O=C(C1=CC=C(OC2=CC(C3=CC(OC)=C(S(=O)(O)=O)C=C3)=C(O)C=C2)C=C1)C4=CC=CC=C4	O=C(C1=CC(C(C2=CC=CC=C2)=O)=CC=C1)C(C=C3)=CC=C3OC4=CC=C(C5=CC=C(O)C=C5)C=C4	0.9	20.1951	318.942	6.63055	1.43622	3.04576
25	OC1=C(S(=O)(O)=O)C=C(C=C(S(=O)(O)=O)C(OC2=CC=CC=C2C#N)=C3)C3=C1	O=C(C1=CC(C2=C(OC)C=CC=C2)=C(OC)C=C1)C(C=C3)=CC=C3OC4=CC=C(C(O)=O)C=C4	0.3	19.2579	279.23	6.32498	1.46107	3.04474
2864	O=C(C1=CC=C(OC2=CC(C3=CC(OC)=C(S(=O)(O)=O)C=C3)=C(O)C=C2)C=C1)C4=CC=CC=C4	O=C(C1=CC=C(OC2=CC=C(C(C3=CC=CC=C3C4=NC(C=CC=C5)=C5N4)C6=CC=C(O)C=C6)C=C2)C=C1)C7=CC=CC=C7	0.9	19.086	313.543	6.26919	1.44615	3.04442
2968	O=C(C1=CC=C(OC2=CC=C(S(=O)(O)=O)C=C2)C=C1)C3=CC=CC=C3	O=S(C(C=C1)=CC=C1OC2=CC=C(C3=CC(C4=CC=CC=C4)=CC=C3)C=C2)(C5=CC=C(OC6=CC=C(C7=CC=CC(C8=CC=C(O)C=C8)=C7)C=C6)C=C5)=O	0.9	19.5295	317.21	6.42174	1.15795	3.04116
141	O=S(C1=CC=C(O)C(S(=O)(O)=O)=C1)(C2=CC(S(=O)(O)=O)=C(OC3=CC=C(C=C(O)C=C4)C4=C3)C=C2)=O	O=C(C1=CC(C(C2=CC=CC=C2)=O)=CC=C1)C(C=C3)=CC=C3OC4=CC=C(O)C=C4	0.4	17.5346	306.882	5.76767	1.1661	3.04016
2900	O=C(C1=CC=C(OC2=CC(C3=CC(OC)=C(S(=O)(O)=O)C=C3)=C(O)C=C2)C=C1)C4=CC=CC=C4	OC(C=C1)=CC=C1C2(C3=CC=C(OC4=CC=CC=C4C#N)C=C3)C5=C(C=CC=C5)C6=CC=CC=C26	0.9	21.195	313.491	6.97307	1.50997	3.03955
310	O=S(C1=CC=C(O)C(S(=O)(O)=O)=C1)(C2=CC(S(=O)(O)=O)=C(OC3=CC=C(OC4=CC=C(O)C=C4)C=C3)C=C2)=O	OC(C=C1)=CC=C1P(C(C=C2)=CC=C2OC(C=C3)=CC=C3C(C4=CC=CC(C(C5=CC=CC=C5)=O)=C4)=O)(C6=CC=CC=C6)=O	0.5	17.8781	342.489	5.88207	1.20811	3.03942
3011	O=C(C1=CC=C(OC2=CC=C(S(=O)(O)=O)C=C2)C=C1)C3=CC=CC=C3	O=C(C1=CC=C(C(C2=CC=C(O)C=C2)=O)C=C1)C3=CC=C(OC4=CC=C(C=C4)C(C(F)(F)F)(C(F)(F)F)C5=CC=CC=C5)C=C3	0.9	20.2399	306.902	6.66138	1.16782	3.0384
2969	O=C(C1=CC=C(OC2=CC=C(S(=O)(O)=O)C=C2)C=C1)C3=CC=CC=C3	O=S(C1=CC=CC=C1)(C2=CC=C(OC3=CC=C(C(C4=CC=C(OC5=CC=C(S(C6=CC=CC=C6)(=O)=O)C=C5)C=C4)=O)C=C3)C=C2)=O	0.9	19.9257	292.054	6.55807	1.16443	3.03835
788	O=C(C1=CC=C(OC2=CC=C(P(C3=CC=C(O)C=C3)(C4=CC=CC=C4)=O)C=C2)C(S(=O)(O)=O)=C1)C5=CC(S(=O)(O)=O)=CC=C5	O=P(C1=CC=C(OC2=CC=C(C3=NNC(C4=C3C=CC=C4)=O)C=C2)C=C1)(C5=CC=CC=C5)C6=CC=CC=C6	0.7	17.5318	322.002	5.77115	1.10623	3.03784
125	O=S(C1=CC=CC(C2=CC=CC(S(=O)(O)=O)=C2)=C1)(O)=O	OC1=C(OC2=CC=C(C(C3=CC(C(C4=CC=CC=C4)=O)=CC=C3)=O)C=C2)C=C5C(C6C=CC5C6)=C1	0.4	18.0079	294.033	5.93294	1.19339	3.03524
347	O=S(C1=CC=CC(S(=O)(O)=O)=C1)(C2=CC=C(OC3=CC=C(C4=CC=CC=C4)C=C3)C(S(=O)(O)=O)=C2)=O	OC1=C(OC2=CC=C(C(C3=CC(C(C4=CC=CC=C4)=O)=CC=C3)=O)C=C2)C=C5C(C6C=CC5C6)=C1	0.6	18.2884	315.84	6.0258	1.13705	3.03502
2845	O=C(C1=CC=C(OC2=CC(C3=CC(OC)=C(S(=O)(O)=O)C=C3)=C(O)C=C2)C=C1)C4=CC=CC=C4	O=C1N(C2=CC=CC=C2C(F)(F)F)C(C3=CC=CC4=C3C1=CC=C4)=O	0.9	20.9788	309.321	6.91337	1.40941	3.03452
353	O=S(C1=CC=CC(S(=O)(O)=O)=C1)(C2=CC=C(OC3=CC=C(C4=CC=CC=C4)C=C3)C(S(=O)(O)=O)=C2)=O	O=C(C1=CC=CC(C(C2=CC=C(OC3=CC=C(C(C)(C)C4=CC=C(O)C=C4)C=C3)C=C2)=O)=C1)C5=CC=CC=C5	0.6	18.5679	320.187	6.12044	1.08122	3.03375
1807	OC1=CC=CC(OC2=CC=C(C=CC=C3)C3=C2)=C1C(C4=C(S(=O)(O)=O)C=CC=C4)=O	O=C(C1=CC=CC=C1)C2=CC=CC=C2	0.8	20.55	312.229	6.77826	1.05158	3.03175
317	O=S(C1=CC=C(O)C(S(=O)(O)=O)=C1)(C2=CC=C(OC3=CC=CC=C3)C(S(=O)(O)=O)=C2)=O	O=C(C1=CC(C(C2=CC=CC=C2)=O)=CC=C1)C(C=C3)=CC=C3OC4=CC=C(O)C=C4	0.5	18.5384	320.245	6.1156	1.05207	3.03133
235	O=S(C1=CC(C2=NC3=C(C=C(N=CS4)C4=C3)S2)=CC5=C(S(=O)(O)=O)C=CC=C51)(O)=O	O=C(C1=CC(C(C2=CC=CC=C2)=O)=CC=C1)C(C=C3)=CC=C3OC4=CC=C(O)C=C4	0.5	19.8925	302.341	6.56573	1.22607	3.02974
3010	O=C(C1=CC=C(OC2=CC=C(S(=O)(O)=O)C=C2)C=C1)C3=CC=CC=C3	O=C(CCCCCCCC=O)NC1=CC=C(C2(C3=CC=C(N)C=C3)C4=CC=CC=C4C5=C2C=CC=C5)C=C1	0.9	21.7424	276.181	7.18018	1.16207	3.02811
88	O=S(C1=CC(C2=NC3=C(C=C(N=CS4)C4=C3)S2)=CC5=C(S(=O)(O)=O)C=CC=C51)(O)=O	O=C(C1=CC(C(C2=CC=CC=C2)=O)=CC=C1)C(C=C3)=CC=C3OC4=CC=C(O)C=C4	0.4	18.8721	312.79	6.23676	1.11619	3.02595
3392	OC1=CC=CC(OC2=CC=C(C=CC=C3)C3=C2)=C1C(C4=C(S(=O)(O)=O)C=CC=C4)=O	SC1=CC(C=C2)=C(C=C1)C=C2SC3=C(C#N)C=CC=C3	0.9	20.5759	308.054	6.80065	1.10442	3.02558
1324	O=C(C1=CC=C(OC2=CC=C(P(C3=CC=C(O)C=C3)(C4=CC=CC=C4)=O)C=C2)C(S(=O)(O)=O)=C1)C5=CC(S(=O)(O)=O)=CC=C5	O=CC1=CC=C(OC2=CC=C(C3=NC4=C(C=C(C5=CC(N=CN6)=C6C=C5)C=C4)N3)C=C2)C=C1	0.8	19.6704	311.301	6.5021	1.11823	3.02524
1686	O=C(C1=CC=C(OC2=CC=C(S(=O)(O)=O)C=C2)C=C1)C3=CC=CC=C3	O=C(C1=CC(C(C2=CC=CC=C2)=O)=CC=C1)C(C=C3)=CC=C3OC4=CC=C(C5=CC=C(O)C=C5)C=C4	0.8	19.2545	306.39	6.36741	1.13966	3.02391
2869	O=C(C1=CC=C(OC2=CC(C3=CC(OC)=C(S(=O)(O)=O)C=C3)=C(O)C=C2)C=C1)C4=CC=CC=C4	OC(C=C1)=CC=C1C2=CC=C(OC3=CC(N=C4C5=CC=CC=C5)=C(C=C3)N=C4C6=CC=C(OC7=NC8=C(N=C7C9=CC=CC=C9)C=CC=C8)C=C6)C=C2	0.9	18.2468	309.726	6.03735	1.38008	3.02233
2986	O=C(C1=CC=C(OC2=CC=C(S(=O)(O)=O)C=C2)C=C1)C3=CC=CC=C3	OC(C=C1)=CC=C1P(C(C=C2)=CC=C2OC(C=C3)=CC=C3C(C4=CC=CC(C(C5=CC=CC=C5)=O)=C4)=O)(C6=CC=CC=C6)=O	0.9	19.4171	309.271	6.42676	1.15207	3.02129
468	C=C(C1=CC(S(=O)(O)=O)=CC=C1)C2=CC=CC=C2	O=C(C1=CC=C(C(C2=CC=C(OC3=CC=C(O)C(C(C)(C)C)=C3)C=C2)=O)C=C1)C4=CC=CC=C4	0.6	19.5963	268.225	6.48734	1.22658	3.0207
2838	O=C(C1=CC=C(OC2=CC(C3=CC(OC)=C(S(=O)(O)=O)C=C3)=C(O)C=C2)C=C1)C4=CC=CC=C4	O=C(NC1=O)C2=C(C1=CC=C3)C3=C(C4=C(C=CC=C5C(N(C6=CC=C(N(C7=CC=CC=C7)C8=CC=CC=C8)C=C6)C9=O)=O)C5=C9C=C4)C=C2	0.9	17.6951	296.873	5.86089	1.42252	3.01917
2830	O=C(C1=CC=C(OC2=CC(C3=CC(OC)=C(S(=O)(O)=O)C=C3)=C(O)C=C2)C=C1)C4=CC=CC=C4	OC1=CC=C(C2(C3=CC=CC=C3C4=CC=CC=C42)C5=CC=C(OC6=CC=C(P(C7=CC=CC=C7)(C8=CC=CC=C8)=O)C=C6)C=C5)C=C1	0.9	18.9037	319.544	6.26349	1.42504	3.01807
3265	OC1=CC=CC(OC2=CC=C(C=CC=C3)C3=C2)=C1C(C4=C(S(=O)(O)=O)C=CC=C4)=O	C1(C2=NC3=CC=C(C4=CC=C(NC=N5)C5=C4)C=C3N2)=CC=CC6=C1C=CC=C6	0.9	20.0159	307.926	6.63517	1.08827	3.01664
2827	O=C(C1=CC=C(OC2=CC(C3=CC(OC)=C(S(=O)(O)=O)C=C3)=C(O)C=C2)C=C1)C4=CC=CC=C4	O=C(C1=CC=C(OC2=CC=C(P(C3=CC=C(O)C=C3)(C4=CC=CC=C4)=O)C=C2)C=C1)C5=CC=CC=C5	0.9	20.1042	321.811	6.66698	1.43535	3.01549
1637	O=C(C1=CC=C(OC2=CC=C(S(=O)(O)=O)C=C2)C=C1)C3=CC=CC=C3	O=C(C1=CC=CC=C1)C(C=C2)=CC=C2OC(C(C)=C3)=C(C)C=C3C4=CC(C)=C(O)C(C)=C4	0.8	21.2234	315.601	7.03937	1.14402	3.01496
3091	O=C(C1=CC=C(OC2=CC=C(S(=O)(O)=O)C=C2)C=C1)C3=CC=CC=C3	O=CC(C=C1)=CC=C1OC(C=C2)=CC=C2C(NC3=CC=C(OC4=CC=C(C(C5=CC=C(OC6=CC=C(N)C=C6)C=C5)(C(F)(F)F)C(F)(F)F)C=C4)C=C3)=O	0.9	19.8416	287.182	6.58127	1.19129	3.01485
2967	O=C(C1=CC=C(OC2=CC=C(S(=O)(O)=O)C=C2)C=C1)C3=CC=CC=C3	CC(CCC(N1C=CN=N1)=O)(C2=CC=C(O)C=C2)C(C=C3)=CC=C3OC(C=C4)=CC=C4C(C5=CC=CC=C5)=O	0.9	20.9225	286.452	6.94455	1.2088	3.0128
1117	O=S(C1=CC=CC(C2=CC=CC(S(=O)(O)=O)=C2)=C1)(O)=O	SC(C=C1)=CC=C1SC(C=C2)=CC=C2SC3=C(C#N)C=CC=C3	0.7	18.1937	285.386	6.04097	1.1649	3.01172
2933	O=C(C1=CC=C(OC2=CC(C3=CC(OC)=C(S(=O)(O)=O)C=C3)=C(O)C=C2)C=C1)C4=CC=CC=C4	O=C1C(C=CC=C2)=C2C(C(C=C3)=CC=C3OC(C=C4)=CC=C4C(N5)=NC(C5=C6)=CC=C6C7=CC(N=CN8)=C8C=C7)=NN1C9=CC=CC=C9	0.9	18.6412	301.312	6.19016	1.34859	3.01143
3028	O=C(C1=CC=C(OC2=CC=C(S(=O)(O)=O)C=C2)C=C1)C3=CC=CC=C3	O=C(N1)C2=C(C(C1=O)=CC=C3C4=O)C3=C(C(N4C5=CC(C(F)(F)F)=C(OC6=CC=C(OC7=CC=CC=C7C(F)(F)F)C=C6)C=C5)=O)C=C2	0.9	20.2909	277.13	6.74587	1.20457	3.0079
20	O=S(C1=CC=CC=C1)(O)=O	O=C(C1=CC=C(C2=CC=C(OC3=CC=CC=C3)C=C2)C=C1)C4=CC=CC=C4	0.3	17.939	281.66	5.96517	1.23774	3.00729
2990	O=C(C1=CC=C(OC2=CC=C(S(=O)(O)=O)C=C2)C=C1)C3=CC=CC=C3	O=C(C1=C(C2=CC=C3C4=NC5=C(N46)C=C(OC7=CC=C(C8=CC=C(O)C=C8)C=C7)C=C5)C3=C(C6=O)C=C1)N9C2=NC%10=C9C=CC=C%10	0.9	19.615	280.975	6.52253	1.16142	3.00727
959	O=C(C1=CC=C(OC2=CC=C(S(=O)(O)=O)C=C2)C=C1)C3=CC=CC=C3	OC1=CC=CC(OC2=CC=C(C=CC=C3)C3=C2)=C1C#N	0.7	19.5688	301.162	6.50756	1.12989	3.00708
1797	OC1=CC=CC(OC2=CC=C(C=CC=C3)C3=C2)=C1C(C4=C(S(=O)(O)=O)C=CC=C4)=O	OC1=CC=C(C(C2=CC=C(OC3=CC=C(C(C4=CC=CC=C4)=O)C=C3)C=C2)=O)C=C1	0.8	20.2901	310.166	6.75713	1.11794	3.00276
3037	O=C(C1=CC=C(OC2=CC=C(S(=O)(O)=O)C=C2)C=C1)C3=CC=CC=C3	OC(C=C1)=CC=C1C(C(F)(F)F)(C(F)(F)F)C(C=C2)=CC=C2OC(C(C(F)(F)F)=C3)=CC=C3C4=CC=C(C5=CC=C(C6=CC=CC(C(F)(F)F)=C6)C=C5)C=C4	0.9	19.3741	314.407	6.45541	1.23934	3.00122
3393	OC1=CC=CC(OC2=CC=C(C=CC=C3)C3=C2)=C1C(C4=C(S(=O)(O)=O)C=CC=C4)=O	SC(C=C1)=CC=C1SC(C=C2)=CC=C2SC3=C(C#N)C=CC=C3	0.9	20.3635	324.318	6.79057	1.10274	2.99879
2979	O=C(C1=CC=C(OC2=CC=C(S(=O)(O)=O)C=C2)C=C1)C3=CC=CC=C3	CC(C)(C1=CC=C(O)C=C1)C(C=C2)=CC=C2OC(C(C(F)(F)F)=C3)=CC=C3C4=CC=C(C5=CC=C(C6=CC=CC(C(F)(F)F)=C6)C=C5)C=C4	0.9	19.6941	315.565	6.56852	1.23214	2.99825
2867	O=C(C1=CC=C(OC2=CC(C3=CC(OC)=C(S(=O)(O)=O)C=C3)=C(O)C=C2)C=C1)C4=CC=CC=C4	O=S(C1=CC=CC=C1)(C2=CC=C(OC3=CC=C(S(=O)(C4=CC=CC=C4)=O)C=C3)C=C2)=O	0.9	20.5926	320.186	6.87112	1.41797	2.99698
173	O=S(C1=CC=CC(S(=O)(O)=O)=C1)(C2=CC=C(OC3=CC=C(C4=CC=CC=C4)C=C3)C(S(=O)(O)=O)=C2)=O	O=C(C1=CC(C(C2=CC=CC=C2)=O)=CC=C1)C(C=C3)=CC=C3OC4=CC=C(C5=CC=C(O)C=C5)C=C4	0.5	17.9344	324.536	5.98794	1.12962	2.99508
3307	OC1=CC=CC(OC2=CC=C(C=CC=C3)C3=C2)=C1C(C4=C(S(=O)(O)=O)C=CC=C4)=O	CCC1=CC=C(OCCCC)C=C1	0.9	20.145	309.183	6.72704	1.13585	2.99463
965	O=C(C1=CC=C(OC2=CC=C(S(=O)(O)=O)C=C2)C=C1)C3=CC=CC=C3	O=S(C1=CC=CC=C1)(C2=CC=C(OC3=CC=C(O)C(C4=CC=C(F)C=C4)=C3)C=C2)=O	0.7	19.08	322.546	6.37381	1.12479	2.99349
3083	O=C(C1=CC=C(OC2=CC=C(S(=O)(O)=O)C=C2)C=C1)C3=CC=CC=C3	O=C(C1=C2C=CC=C1)NC2(C3=CC=C(O)C=C3)C(C=C4)=CC=C4OC5=CC=C(C6=CC=C(C7=CC=C(C8=CC=CC(C(F)(F)F)=C8)C=C7)C=C6)C=C5C(F)(F)F	0.9	19.5046	313.844	6.51709	1.41109	2.99284
132	O=S(C1=CC=CC(C2=CC=CC(S(=O)(O)=O)=C2)=C1)(O)=O	OC1=CC=C(C(C(C=C2)=CC=C2OC(C=C3)=CC=C3C(CCC(O)=O)(C)C4=CC=CC=C4)=O)C=C1	0.4	17.5317	303.976	5.86038	1.18756	2.99156
973	O=C(C1=CC=C(OC2=CC=C(S(=O)(O)=O)C=C2)C=C1)C3=CC=CC=C3	OC1=CC=C(S(C2=CC=C(OC3=CC=C(C4=CC=CC=C4)C=C3)C=C2)(=O)=O)C=C1	0.7	19.092	319.009	6.38901	1.12654	2.98826
977	O=C(C1=CC=C(OC2=CC=C(S(=O)(O)=O)C=C2)C=C1)C3=CC=CC=C3	O=S(C1=CC=C(O)C=C1)(C2=CC=C(OC3=CC=CC=C3)C=C2)=O	0.7	19.4895	313.566	6.52629	1.16888	2.9863
1188	OC1=CC(S(=O)(O)=O)=C(OC2=CC=CC=C2C#N)C=C1	O=C(C1=CC=CC=C1)C2=CC=C(C(C3=CC=CC=C3)=O)C=C2	0.7	20.1553	288.211	6.74926	1.24773	2.9863
2828	O=C(C1=CC=C(OC2=CC(C3=CC(OC)=C(S(=O)(O)=O)C=C3)=C(O)C=C2)C=C1)C4=CC=CC=C4	O=P(C1=CC=C(O)C=C1)(C2=CC=CC=C2)C(C=C3)=CC=C3OC(C=C4)=CC=C4S(C5=CC=CC=C5)(=O)=O	0.9	19.9841	324.432	6.69495	1.43036	2.98495
1002	O=C(NC1=O)C2=CC=C3C4=C2C1=CC=C4C(N(C5=CC=C(OC6=CC(C=C(OC7=CC=CC=C7)C(S(=O)(O)=O)=C8)=C8C=C6S(=O)(O)=O)C=C5)C3=O)=O	O=C(NC1=O)C2=C(C1=CC=C3C(N(C4=CC=C(OC5=CC=CC=C5)C=C4)C6=O)=O)C3=C6C=C2	0.7	21.2667	290.058	7.12555	1.01376	2.98457
3007	O=C(C1=CC=C(OC2=CC=C(S(=O)(O)=O)C=C2)C=C1)C3=CC=CC=C3	O=C(C1=CC=C(C(C2=CC=CC=C2)=O)C=C1)C(C=C3)=CC=C3OC(C(C)=C4)=C(C)C=C4C5=CC(C)=C(O)C(C)=C5	0.9	21.0794	309.061	7.06566	1.20461	2.98336
464	O=S(C1=CC(C2=NC3=C(C=C(N=CS4)C4=C3)S2)=CC5=C(S(=O)(O)=O)C=CC=C51)(O)=O	O=C(C1=CC(C(C2=CC=CC=C2)=O)=CC=C1)C(C=C3)=CC=C3OC4=CC=C(O)C=C4	0.6	19.2428	301.128	6.45508	1.28911	2.98103
2824	O=C(C1=CC=C(OC2=CC(C3=CC(OC)=C(S(=O)(O)=O)C=C3)=C(O)C=C2)C=C1)C4=CC=CC=C4	O=S(C(C=C1)=CC=C1C2=NC3=CC=C(C4=CC=C(NC=N5)C5=C4)C=C3N2)(C6=CC=CC=C6)=O	0.9	20.727	310.46	6.95305	1.41394	2.98099
2944	O=C(C1=CC=C(OC2=CC(C3=CC(OC)=C(S(=O)(O)=O)C=C3)=C(O)C=C2)C=C1)C4=CC=CC=C4	O=CC(C=C1)=CC=C1OC(C=C2)=CC=C2C(NC3=CC=C(OC4=CC=C(C(C5=CC=C(OC6=CC=C(N)C=C6)C=C5)(C(F)(F)F)C(F)(F)F)C=C4)C=C3)=O	0.9	18.0085	309.368	6.04423	1.41136	2.97945
960	O=C(C1=CC=C(OC2=CC=C(S(=O)(O)=O)C=C2)C=C1)C3=CC=CC=C3	O=S(C1=CC=C(O)C=C1)(C2=CC=C(OC3=CC=C(C=CC=C4)C4=C3)C=C2)=O	0.7	19.3853	310.19	6.50785	1.07829	2.97875
3082	O=C(C1=CC=C(OC2=CC=C(S(=O)(O)=O)C=C2)C=C1)C3=CC=CC=C3	O=C(N(C1=CC=CC=C1)C2=O)C(C2=C(C3=CC=C(O)C=C3)C4=C5C=CC=C4)=C5C(C=C6)=CC=C6OC7=CC=C(C(C=C8)=CC=C8C(C=C9)=CC=C9C%10=CC(C(F)(F)F)=CC=C%10)C=C7C(F)(F)F	0.9	18.7696	305.462	6.31472	1.51409	2.97235
1378	O=C(C1=CC=C(OC2=CC=C(P(C3=CC=C(O)C=C3)(C4=CC=CC=C4)=O)C=C2)C(S(=O)(O)=O)=C1)C5=CC(S(=O)(O)=O)=CC=C5	O=C(NC1=O)C2=C(C1=CC=C3)C3=C(C4=C(C=CC=C5C(N(C6=CC=C(OC7=CC=CC=C7)C=C6)C8=O)=O)C5=C8C=C4)C=C2	0.8	18.5971	307.888	6.258	1.12961	2.97174
2825	O=C(C1=CC=C(OC2=CC(C3=CC(OC)=C(S(=O)(O)=O)C=C3)=C(O)C=C2)C=C1)C4=CC=CC=C4	O=S(C1=CC=CC=C1C2=NC3=CC=C(C4=CC=C(N=CN5)C5=C4)C=C3N2)(C6=CC=CC=C6)=O	0.9	20.8282	309.57	7.01041	1.41348	2.97103
2917	O=C(C1=CC=C(OC2=CC(C3=CC(OC)=C(S(=O)(O)=O)C=C3)=C(O)C=C2)C=C1)C4=CC=CC=C4	O=C(C1=C2C(C=CC=C23)=CC=C1)N(C4=CC=CC(C(C5=CC=CC=C5)=O)=C4)C3=O	0.9	20.4447	303.943	6.88403	1.40496	2.96988
2836	O=C(C1=CC=C(OC2=CC(C3=CC(OC)=C(S(=O)(O)=O)C=C3)=C(O)C=C2)C=C1)C4=CC=CC=C4	O=S(C1=CC=CC=C1)(C2=CC=C(C=C2)OC3=CC=C(C=C3)C4(C5=CC=C(C=C5)O)C6=C(C=CC=C6)C7=C4C=CC=C7)=O	0.9	18.9509	318.251	6.38329	1.43454	2.96883
1184	OC1=CC(S(=O)(O)=O)=C(OC2=CC=CC=C2C#N)C=C1	OC1=C(OC2=CC=C(C(C3=CC(C(C4=CC=CC=C4)=O)=CC=C3)=O)C=C2)C=C5C(C6C=CC5C6)=C1	0.7	18.6604	293.479	6.2857	1.43693	2.9687
2973	O=C(C1=CC=C(OC2=CC=C(S(=O)(O)=O)C=C2)C=C1)C3=CC=CC=C3	OC1=CC=C(C2=CC=C(OC3=CC=C(S(=O)(C4=CC=C(OC5=CC=C(C6=CC=C(O)C=C6)C=C5)C=C4)=O)C=C3)C=C2)C=C1	0.9	19.6553	315.189	6.62258	1.16337	2.96793
351	O=S(C1=CC=CC(S(=O)(O)=O)=C1)(C2=CC=C(OC3=CC=C(C4=CC=CC=C4)C=C3)C(S(=O)(O)=O)=C2)=O	O=C(C1=CC=CC=C1)C2=CC=C(C(C3=CC=CC=C3)=O)C=C2	0.6	18.2226	270.069	6.14075	1.02479	2.9675
2937	O=C(C1=CC=C(OC2=CC(C3=CC(OC)=C(S(=O)(O)=O)C=C3)=C(O)C=C2)C=C1)C4=CC=CC=C4	O=C(C1=CC=C(OC2=CC=C(C(C)(C)C3=CC=C(C(C)(C)C4=CC=C(O)C=C4)C=C3)C=C2)C=C1)C5=CC=CC=C5	0.9	19.8979	319.114	6.71124	1.44379	2.96487
71	O=S(C1=CC=CC=C1)(O)=O	O=C(C1=CC=C(C2=CC=C(OC3=CC=CC=C3)C=C2)C=C1)C4=CC=CC=C4	0.4	17.7407	280.534	5.9859	1.25849	2.96374
1624	O=C(C1=CC=C(OC2=CC=C(S(=O)(O)=O)C=C2)C=C1)C3=CC=CC=C3	O=P(C1=CC=C(O)C=C1)(C2=CC=CC=C2)C(C=C3)=CC=C3OC(C=C4)=CC=C4S(C5=CC=CC=C5)(=O)=O	0.8	19.2609	315.461	6.49921	1.13782	2.96358
1614	O=C(C1=CC=C(OC2=CC=C(S(=O)(O)=O)C=C2)C=C1)C3=CC=CC=C3	O=C(C1=CC=C(F)C=C1)C(C=C2)=CC=C2OC(C=C3)=CC=C3C(C(F)(F)F)(C(F)(F)F)C4=CC=CC=C4	0.8	20.4889	281.241	6.91666	1.19801	2.96225
344	OC1=CC(S(=O)(O)=O)=C(OC2=CC=CC=C2C#N)C=C1	OC1=CC=C(C(C2=CC=C(OC3=CC=C(C(C4=CC=CC=C4)=O)C=C3)C=C2)=O)C=C1	0.5	19.047	295.332	6.43332	1.40033	2.96069
929	O=C(C1=CC=C(OC2=CC=C(S(=O)(O)=O)C=C2)C=C1)C3=CC=CC=C3	O=S(C1=CC=CC=C1)(C2=CC=C(OC3=CC=C(O)C(C4=CC(F)=C(F)C=C4)=C3)C=C2)=O	0.7	18.3985	331.577	6.21535	1.12113	2.96018
588	O=S(C1=CC=CC(S(=O)(O)=O)=C1)(C2=CC=C(OC3=CC=C(C4=CC=C(O)C=C4)C=C3)C(S(=O)(O)=O)=C2)=O	OC(C=C1)=CC=C1P(C(C=C2)=CC=C2OC(C=C3)=CC=C3C(C4=CC=CC(C(C5=CC=CC=C5)=O)=C4)=O)(C6=CC=CC=C6)=O	0.6	17.9938	342.834	6.08164	1.00005	2.95871
2940	O=C(C1=CC=C(OC2=CC(C3=CC(OC)=C(S(=O)(O)=O)C=C3)=C(O)C=C2)C=C1)C4=CC=CC=C4	FC(C1=CC(C(C=C2)=CC=C2N3N=NC(C4=CC(C5=CNN=N5)=CC=C4)=C3)=CC=C1OC6=C(C(F)(F)F)C=C(C7=CC=CC=C7)C=C6)(F)F	0.9	18.0339	303.493	6.09756	1.55479	2.95755
436	O=C(C1=CC(S(=O)(O)=O)=CC=C1)C2=CC=CC=C2	O=S(C1=CC=CC=C1)(C2=CC=C(OC3=CC=C(S(=O)(C4=CC=CC=C4)=O)C=C3)C=C2)=O	0.6	18.586	269.904	6.28564	1.13103	2.95689
1611	O=C(C1=CC=C(OC2=CC=C(S(=O)(O)=O)C=C2)C=C1)C3=CC=CC=C3	C=S(C(C=C1)=CC=C1OC2=CC3=CC=CC=C3C=C2)(C4=CC=C(OC5=CC=C(C=CC(O)=C6)C6=C5)C=C4)=C	0.8	18.6551	317.15	6.30901	1.12607	2.95689
2811	O=C(C1=CC=C(OC2=CC(C3=CC(OC)=C(S(=O)(O)=O)C=C3)=C(O)C=C2)C=C1)C4=CC=CC=C4	FC1=C(O)C(F)=C(F)C(C2=C(F)C(F)=C(OC3=CC=C(C4=CC=C(O)C=C4)C=C3)C(F)=C2F)=C1F	0.9	20.6659	317.749	6.98959	1.51846	2.95667
2882	O=C(C1=CC=C(OC2=CC(C3=CC(OC)=C(S(=O)(O)=O)C=C3)=C(O)C=C2)C=C1)C4=CC=CC=C4	O=C(C1=CC=C(OC2=CC=C(C(C3=C(F)C(F)=C(OC4=CC=C(C(C(F)(F)F)(C(F)(F)F)C5=CC=C(O)C=C5)C=C4)C(F)=C3F)=O)C=C2)C=C1)C6=C(F)C(F)=CC(F)=C6F	0.9	18.9205	319.088	6.40181	1.53455	2.9555
978	O=C(C1=CC=C(OC2=CC=C(S(=O)(O)=O)C=C2)C=C1)C3=CC=CC=C3	O=C(C1=CC(C(C2=CC=CC=C2)=O)=CC=C1)C(C=C3)=CC=C3OC4=CC=C(C5=CC=C(O)C=C5)C=C4	0.7	18.5513	310.076	6.27732	1.15989	2.95529
2875	O=C(C1=CC=C(OC2=CC(C3=CC(OC)=C(S(=O)(O)=O)C=C3)=C(O)C=C2)C=C1)C4=CC=CC=C4	O=C(N1)C2=C(C(C1=O)=CC=C3C4=O)C3=C(C(N4C5=CC(C(F)(F)F)=C(OC6=CC=C(OC7=CC=CC=C7C(F)(F)F)C=C6)C=C5)=O)C=C2	0.9	18.7009	308.048	6.33159	1.44618	2.95358
1789	OC1=CC=CC(OC2=CC=C(C=CC=C3)C3=C2)=C1C(C4=C(S(=O)(O)=O)C=CC=C4)=O	OC(C=C1)=CC=C1C(C=C2)=CC=C2OC3=C(C#N)C=CC=C3	0.8	20.1527	302.718	6.82353	1.18042	2.95341
2808	O=C(C1=CC=C(OC2=CC(C3=CC(OC)=C(S(=O)(O)=O)C=C3)=C(O)C=C2)C=C1)C4=CC=CC=C4	C=S(C(C=C1)=CC=C1OC2=CC3=CC=CC=C3C=C2)(C4=CC=C(OC5=CC=C(C=CC(O)=C6)C6=C5)C=C4)=C	0.9	19.8051	318.83	6.71023	1.37117	2.95148
969	O=C(C1=CC=C(OC2=CC=C(S(=O)(O)=O)C=C2)C=C1)C3=CC=CC=C3	O=S(C1=CC=C(OC2=CC=CC=C2C3=CC=C(F)C=C3)C=C1)(C4=CC=C(O)C=C4)=O	0.7	19.0939	317.84	6.47345	1.1595	2.94957
691	O=S(C1=CC=CC(S(=O)(O)=O)=C1)(C2=CC=C(OC3=CC=C(C4=CC=CC=C4)C=C3)C(S(=O)(O)=O)=C2)=O	O=C(C1=CC(C(C2=CC=CC=C2)=O)=CC=C1)C(C=C3)=CC=C3OC4=CC=C(O)C=C4	0.7	18.8288	342.553	6.38669	0.957055	2.94812
1655	O=C(C1=CC=C(OC2=CC=C(S(=O)(O)=O)C=C2)C=C1)C3=CC=CC=C3	O=C(N1)C2=C(C(C1=O)=CC=C3C4=O)C3=C(C(N4C5=CC=C(OC6=CC=C(C7=CC=C(OC8=CC=CC=C8)C=C7)C=C6)C=C5)=O)C=C2	0.8	17.9155	276.93	6.07963	1.15522	2.9468
3367	OC1=CC=CC(OC2=CC=C(C=CC=C3)C3=C2)=C1C(C4=C(S(=O)(O)=O)C=CC=C4)=O	O=C(C1=CC=CC=C1)C2=CC=CC=C2	0.9	20.723	310.926	7.03366	1.10226	2.94626
1146	OC1=CC2=C(C=C(S(=O)(O)=O)C=C2OC3=CC=CC=C3C#N)C=C1	O=C(C1=CC=CC=C1)C2=CC=C(C(C3=CC=CC=C3)=O)C=C2	0.7	19.1309	287.185	6.49443	1.09783	2.94574
3027	O=C(C1=CC=C(OC2=CC=C(S(=O)(O)=O)C=C2)C=C1)C3=CC=CC=C3	O=C(N1)C2=C(C(C1=O)=CC=C3C4=O)C3=C(C(N4C5=CC=C(OC6=CC=C(C7=CC=C(OC8=C(C(F)(F)F)C=CC=C8)C=C7)C=C6)C(C(F)(F)F)=C5)=O)C=C2	0.9	19.8565	279.109	6.74132	1.21563	2.94548
1670	O=C(C1=CC=C(OC2=CC=C(S(=O)(O)=O)C=C2)C=C1)C3=CC=CC=C3	OC(C=C1)=CC=C1C2(C3=CC=C(OC4=CC=CC=C4C#N)C=C3)C5=C(C=CC=C5)C6=CC=CC=C26	0.8	18.4092	308.146	6.25098	1.29342	2.94501
1632	O=C(C1=CC=C(OC2=CC=C(S(=O)(O)=O)C=C2)C=C1)C3=CC=CC=C3	O=C(C1=CC=C(C(C2=CC=C(OC3=CC=C(O)C(C(C)(C)C)=C3)C=C2)=O)C=C1)C4=CC=CC=C4	0.8	20.5404	304.252	6.97955	1.15206	2.94294
2813	O=C(C1=CC=C(OC2=CC(C3=CC(OC)=C(S(=O)(O)=O)C=C3)=C(O)C=C2)C=C1)C4=CC=CC=C4	CC(CCC(N1C=CN=N1)=O)(C2=CC=C(O)C=C2)C(C=C3)=CC=C3OC(C=C4)=CC=C4C(C5=CC=CC=C5)=O	0.9	19.5299	305.238	6.63695	1.4446	2.9426
2880	O=C(C1=CC=C(OC2=CC(C3=CC(OC)=C(S(=O)(O)=O)C=C3)=C(O)C=C2)C=C1)C4=CC=CC=C4	O=C(C1=CC=C(CCCCCCCCCCCCCCCCCC)C=C1)C2=CC=CC=C2	0.9	20.2124	314.721	6.87262	1.4229	2.941
383	O=S(C1=C(OC2=CC=C(C3=NC4=C(C=C(N=CS5)C5=C4)S3)C=C2S(=O)(O)=O)C=CC=C1)(O)=O	O=S(C1=CC=C(OC2=CC=CC=C2C3=CC=C(F)C=C3)C=C1)(C4=CC=C(O)C=C4)=O	0.6	17.508	393.051	5.95364	1.20253	2.94073
3400	OC1=CC=CC(OC2=CC=C(C=CC=C3)C3=C2)=C1C(C4=C(S(=O)(O)=O)C=CC=C4)=O	N#CC1=C(C2=CC=C(OC3=CC=CC=C3)C=C2)C=CC=C1	0.9	20.4892	303.622	6.97943	1.10182	2.93566
2922	O=C(C1=CC=C(OC2=CC(C3=CC(OC)=C(S(=O)(O)=O)C=C3)=C(O)C=C2)C=C1)C4=CC=CC=C4	O=C(C1=CC=CC(C(C2=CC=C(OC3=CC=C(C(C)(C)C4=CC=C(O)C=C4)C=C3)C=C2)=O)=C1)C5=CC=CC=C5	0.9	19.3535	319.021	6.59284	1.44084	2.93554
1222	O=C(C1=CC=C(OC2=CC=CC=C2)C=C1)C3=CC(C4=C(C=CC=C4)OCCCS(=O)(O)=O)=C(C=C3)OCCCS(=O)(O)=O	O=P(C1=CC=C(SC2=CC=C(SC3=CC=C(S)C=C3)C=C2)C=C1)(C4=CC=CC=C4)C5=CC=CC=C5	0.8	17.9875	301.864	6.1276	1.20165	2.93549
944	O=C(C1=CC=C(OC2=CC=C(S(=O)(O)=O)C=C2)C=C1)C3=CC=CC=C3	CC(C1=CC=CC=C1)(C(F)(F)F)C2=CC=C(C3=NC4=C(C=C(N=CS5)C5=C4)S3)C=C2	0.7	18.424	273.318	6.2768	1.18599	2.93525
1623	O=C(C1=CC=C(OC2=CC=C(S(=O)(O)=O)C=C2)C=C1)C3=CC=CC=C3	O=C(C1=CC=C(OC2=CC=C(P(C3=CC=C(O)C=C3)(C4=CC=CC=C4)=O)C=C2)C=C1)C5=CC=CC=C5	0.8	19.3233	315.425	6.58375	1.13398	2.935
2816	O=C(C1=CC=C(OC2=CC(C3=CC(OC)=C(S(=O)(O)=O)C=C3)=C(O)C=C2)C=C1)C4=CC=CC=C4	OC1=CC=C(C2=CC=C(OC3=CC=C(S(=O)(C4=CC=C(OC5=CC=C(C6=CC=C(O)C=C6)C=C5)C=C4)=O)C=C3)C=C2)C=C1	0.9	18.3974	318.868	6.2717	1.47636	2.9334
3018	O=C(C1=CC=C(OC2=CC=C(S(=O)(O)=O)C=C2)C=C1)C3=CC=CC=C3	O=P(C1=CC=C(OC2=CC=C(C(C(F)(F)F)(C(F)(F)F)C3=CC=C(O)C=C3)C=C2)C=C1)(C4=CC=CC=C4)C5=CC=CC=C5	0.9	19.9651	314.134	6.81205	1.16864	2.93085
510	O=C(C1=CC=C(OC2=CC=C(S(=O)(O)=O)C=C2)C=C1)C3=CC=CC=C3	OC1=CC=CC(OC2=CC=C(C=CC=C3)C3=C2)=C1C#N	0.6	18.2839	308.409	6.23975	1.08864	2.93022
3348	OC1=CC=CC(OC2=CC=C(C=CC=C3)C3=C2)=C1C(C4=C(S(=O)(O)=O)C=CC=C4)=O	O=C(C1=CC=CC=C1)C2=CC=C(C(C3=CC=CC=C3)=O)C=C2	0.9	20.6467	308.914	7.04802	1.10822	2.92943
36	O=S(C1=CC=CC(C2=CC=CC(S(=O)(O)=O)=C2)=C1)(O)=O	OC1=CC=C(C(C(C=C2)=CC=C2OC(C=C3)=CC=C3C(CCC(O)=O)(C)C4=CC=CC=C4)=O)C=C1	0.3	17.9136	308.183	6.11644	1.25156	2.92876
2874	O=C(C1=CC=C(OC2=CC(C3=CC(OC)=C(S(=O)(O)=O)C=C3)=C(O)C=C2)C=C1)C4=CC=CC=C4	O=C(N1)C2=C(C(C1=O)=CC=C3C4=O)C3=C(C(N4C5=CC=C(OC6=CC=C(C7=CC=C(OC8=C(C(F)(F)F)C=CC=C8)C=C7)C=C6)C(C(F)(F)F)=C5)=O)C=C2	0.9	18.2882	307.688	6.24499	1.46964	2.92846
2831	O=C(C1=CC=C(OC2=CC(C3=CC(OC)=C(S(=O)(O)=O)C=C3)=C(O)C=C2)C=C1)C4=CC=CC=C4	O=C(C1=C(C2=CC=C3C4=NC5=C(N46)C=C(OC7=CC=C(C8=CC=C(O)C=C8)C=C7)C=C5)C3=C(C6=O)C=C1)N9C2=NC%10=C9C=CC=C%10	0.9	18.4967	301.84	6.32468	1.35565	2.92453
1360	O=C(C1=CC=C(OC2=CC=C(P(C3=CC=C(O)C=C3)(C4=CC=CC=C4)=O)C=C2)C(S(=O)(O)=O)=C1)C5=CC(S(=O)(O)=O)=CC=C5	O=C(C1=CC=CC2=C1C3=CC=C2)N(NC4=CC=C(CC5=CC=C(NN(C6=O)C(C7=C(C6=CC=C8)C8=CC=C7)=O)C=C5)C=C4)C3=O	0.8	18.7746	267.33	6.42293	1.14683	2.92305
2876	O=C(C1=CC=C(OC2=CC(C3=CC(OC)=C(S(=O)(O)=O)C=C3)=C(O)C=C2)C=C1)C4=CC=CC=C4	O=C(N1)C2=C(C(C1=O)=CC=C3C4=O)C3=C(C(N4C5=CC=C(OC6=CC=C(C7=CC=C(OC8=CC=CC=C8)C=C7)C=C6)C=C5)=O)C=C2	0.9	18.1686	307.058	6.21645	1.42111	2.92266
1365	O=C(C1=CC=C(OC2=CC=C(P(C3=CC=C(O)C=C3)(C4=CC=CC=C4)=O)C=C2)C(S(=O)(O)=O)=C1)C5=CC(S(=O)(O)=O)=CC=C5	CCC1=CC=C(OCCCC)C=C1	0.8	18.3236	345.828	6.27357	1.10269	2.92076
1620	O=C(C1=CC=C(OC2=CC=C(S(=O)(O)=O)C=C2)C=C1)C3=CC=CC=C3	O=P(C1=CC=C(OC2=CC=C(C3=NNC(C4=C3C=CC=C4)=O)C=C2)C=C1)(C5=CC=CC=C5)C6=CC=CC=C6	0.8	18.0506	284.959	6.18114	1.11709	2.92027
82	O=C(C1=CC(S(=O)(O)=O)=CC=C1)C2=CC=CC=C2	O=S(C1=CC=C(O)C=C1)(C2=CC=C(OC3=CC=C(C(C4=CC=CC=C4)=O)C=C3)C=C2)=O	0.4	18.4511	311.671	6.32088	1.07689	2.91908
1179	O=S(C1=CC=CC(S(=O)(O)=O)=C1)(C2=CC(S(=O)(O)=O)=C(SC3=CC(C=CC(S)=C4)=C4C=C3)C=C2)=O	SC(C=C1)=CC=C1SC(C=C2)=CC=C2SC3=C(C#N)C=CC=C3	0.7	17.9453	343.802	6.15062	1.14427	2.91763
348	O=S(C1=CC=CC(S(=O)(O)=O)=C1)(C2=CC=C(OC3=CC=C(C4=CC=CC=C4)C=C3)C(S(=O)(O)=O)=C2)=O	O=C(C1=CC=C(C(C2=CC=C(OC3=CC=C(O)C(C(C)(C)C)=C3)C=C2)=O)C=C1)C4=CC=CC=C4	0.6	18.8398	319.732	6.45897	1.09221	2.91683
1756	OC1=CC=CC(OC2=CC=C(C=CC=C3)C3=C2)=C1C(C4=C(S(=O)(O)=O)C=CC=C4)=O	OC1=CC=C(OC2=CC=C(OC3=CC=C(S(C4=CC=CC=C4)(=O)=O)C=C3)C=C2)C=C1	0.8	20.2629	308.8	6.9541	1.15306	2.9138
3084	O=C(C1=CC=C(OC2=CC=C(S(=O)(O)=O)C=C2)C=C1)C3=CC=CC=C3	O=C(C1=C2C=CC=C1)N(CCCS(=O)(O)=O)C2(C3=CC=C(O)C=C3)C(C=C4)=CC=C4OC5=CC=C(C6=CC=C(C7=CC=C(C8=CC=CC(C(F)(F)F)=C8)C=C7)C=C6)C=C5C(F)(F)F	0.9	19.0831	308.723	6.55044	1.55655	2.91325
1195	O=S(C1=CC=CC(S(=O)(O)=O)=C1)(C2=CC=C(OC3=CC=C(C4=CC=CC=C4)C=C3)C(S(=O)(O)=O)=C2)=O	O=C(C1=CC=CC2=C1C3=CC=C2)N(NC4=CC=C(OC5=CC=C(NN(C6=O)C(C7=C(C6=CC=C8)C8=CC=C7)=O)C=C5)C=C4)C3=O	0.8	18.4438	294.824	6.33854	0.65817	2.90978
1628	O=C(C1=CC=C(OC2=CC=C(S(=O)(O)=O)C=C2)C=C1)C3=CC=CC=C3	O=S(C1=CC=CC=C1)(C2=CC=C(C=C2)OC3=CC=C(C=C3)C(C4=CC=CC=C4)(C5=CC=CC=C5)C6=CC=C(C=C6)O)=O	0.8	18.5438	317.763	6.37593	1.16751	2.90841
53	O=S(C1=CC=CC=C1)(O)=O	O=C(C1=CC=C(C=C1)F)C2=CC=C(C=C2)OC3=CC=C(C=C3)C(C)(C4=CC=C(C=C4)O)C	0.4	18.7302	306.602	6.44016	1.28854	2.90834
3034	O=C(C1=CC=C(OC2=CC=C(S(=O)(O)=O)C=C2)C=C1)C3=CC=CC=C3	O=C(C1=CC=C(OC2=CC=C(C(C3=C(F)C(F)=C(OC4=CC=C(C(C(F)(F)F)(C(F)(F)F)C5=CC=C(O)C=C5)C=C4)C(F)=C3F)=O)C=C2)C=C1)C6=C(F)C(F)=CC(F)=C6F	0.9	19.7216	308.531	6.78652	1.45543	2.906
1625	O=C(C1=CC=C(OC2=CC=C(S(=O)(O)=O)C=C2)C=C1)C3=CC=CC=C3	OC1=C(OC2=CC=C(C(C3=CC(C(C4=CC=CC=C4)=O)=CC=C3)=O)C=C2)C=C5C(C6C=CC5C6)=C1	0.8	20.3415	304.419	6.99987	1.22216	2.90598
1774	OC1=CC=CC(OC2=CC=C(C=CC=C3)C3=C2)=C1C(C4=C(S(=O)(O)=O)C=CC=C4)=O	O=C(C1=CC(C2=C(OC)C=CC=C2)=C(OC)C=C1)C(C=C3)=CC=C3OC4=CC=C(C(O)=O)C=C4	0.8	20.6121	303.628	7.09541	1.26157	2.90499
610	O=S(C1=CC(S(=O)(O)=O)=C(OC2=CC=CC=C2C3=CC=C(F)C=C3)C=C1)(C4=CC=C(O)C(S(=O)(O)=O)=C4)=O	OC(C=C1)=CC=C1P(C(C=C2)=CC=C2OC(C=C3)=CC=C3C(C4=CC=CC(C(C5=CC=CC=C5)=O)=C4)=O)(C6=CC=CC=C6)=O	0.6	17.5076	344.79	6.03067	1.09634	2.90309
1647	O=C(C1=CC=C(OC2=CC=C(S(=O)(O)=O)C=C2)C=C1)C3=CC=CC=C3	O=S(C1=CC=CC=C1)(C2=CC=C(OC3=CC=C(S(=O)(C4=CC=CC=C4)=O)C=C3)C=C2)=O	0.8	20.5983	280.971	7.09896	1.07141	2.90159
636	OC1=CC2=C(C=C(S(=O)(O)=O)C=C2OC3=CC=CC=C3C#N)C=C1	O=C(C1=CC(C(C2=CC=CC=C2)=O)=CC=C1)C(C=C3)=CC=C3OC4=CC=C(O)C=C4	0.6	18.5394	302.641	6.39307	1.14005	2.89992
1784	OC1=CC=CC(OC2=CC=C(C=CC=C3)C3=C2)=C1C(C4=C(S(=O)(O)=O)C=CC=C4)=O	O=P(C1=CC=C(OC2=CC=C(O)C=C2)C=C1)(C3=CC=CC=C3)C4=CC=CC=C4	0.8	19.9471	318.486	6.8801	1.07698	2.89924
1754	OC1=CC=CC(OC2=CC=C(C=CC=C3)C3=C2)=C1C(C4=C(S(=O)(O)=O)C=CC=C4)=O	O=S(C1=CC=C(O)C=C1)(C2=CC=C(OC3=CC=C(C(C4=CC=CC=C4)=O)C=C3)C=C2)=O	0.8	20.519	310.991	7.07815	1.11607	2.89892
1788	OC1=CC=CC(OC2=CC=C(C=CC=C3)C3=C2)=C1C(C4=C(S(=O)(O)=O)C=CC=C4)=O	O=S(C1=CC=CC=C1)(C2=CC=C(OC3=CC=C(O)C(C4=CC=C(F)C=C4)=C3)C=C2)=O	0.8	19.9731	311.083	6.89035	1.14339	2.89871
1751	OC1=CC=CC(OC2=CC=C(C=CC=C3)C3=C2)=C1C(C4=C(S(=O)(O)=O)C=CC=C4)=O	O=C(C1=CC=C(OC2=CC=C(P(C3=CC=C(O)C=C3)(C4=CC=CC=C4)=O)C=C2)C=C1)C5=CC=CC=C5	0.8	19.1898	320.721	6.62672	1.16601	2.89582
520	O=C(C1=CC=C(OC2=CC=C(S(=O)(O)=O)C=C2)C=C1)C3=CC=CC=C3	OC1=CC=C(S(C2=CC=C(OC3=CC=C(C4=CC=CC=C4)C=C3)C=C2)(=O)=O)C=C1	0.6	17.6765	334.677	6.10541	1.08132	2.89522
1194	O=S(C1=CC=CC(S(=O)(O)=O)=C1)(C2=CC=C(OC3=CC=C(C4=CC=CC=C4)C=C3)C(S(=O)(O)=O)=C2)=O	O=C(NC1=O)C2=C(C1=CC=C3)C3=C(C4=C(C=CC=C5C(N(C6=CC=C(N(C7=CC=CC=C7)C8=CC=CC=C8)C=C6)C9=O)=O)C5=C9C=C4)C=C2	0.8	17.5182	301.878	6.0522	0.6427	2.89452
460	O=S(C1=CC(C2=NC3=C(C=C(N=CS4)C4=C3)S2)=CC5=C(S(=O)(O)=O)C=CC=C51)(O)=O	OC(C=C1)=CC=C1P(C(C=C2)=CC=C2OC(C=C3)=CC=C3C(C4=CC=CC(C(C5=CC=CC=C5)=O)=C4)=O)(C6=CC=CC=C6)=O	0.6	17.8212	319.504	6.15967	1.27482	2.8932
193	O=S(C1=CC=CC=C1)(O)=O	O=C(C1=CC(C(C2=CC=CC=C2)=O)=CC=C1)C(C=C3)=CC=C3OC4=CC=C(C5=CC=C(O)C=C5)C=C4	0.5	17.8021	294.916	6.15789	1.28197	2.89094
1816	OC1=CC=CC(OC2=CC=C(C=CC=C3)C3=C2)=C1C(C4=C(S(=O)(O)=O)C=CC=C4)=O	N=P(OC1=CC=C(F)C=C1)OC2=CC=C(OC)C=C2	0.8	20.0235	305.817	6.92718	1.18697	2.89057
1359	O=C(C1=CC=C(OC2=CC=C(P(C3=CC=C(O)C=C3)(C4=CC=CC=C4)=O)C=C2)C(S(=O)(O)=O)=C1)C5=CC(S(=O)(O)=O)=CC=C5	O=C(C1=CC=CC2=C1C3=CC=C2)N(NC4=CC=C(OC5=CC=C(NN(C6=O)C(C7=C(C6=CC=C8)C8=CC=C7)=O)C=C5)C=C4)C3=O	0.8	17.8926	280.342	6.19046	1.10998	2.89034
462	O=S(C1=CC(C2=NC3=C(C=C(N=CS4)C4=C3)S2)=CC5=C(S(=O)(O)=O)C=CC=C51)(O)=O	O=C(C1=CC=CC=C1)C2=CC=C(C(C3=CC=CC=C3)=O)C=C2	0.6	19.2049	269.338	6.645	1.33449	2.89013
2924	O=C(C1=CC=C(OC2=CC(C3=CC(OC)=C(S(=O)(O)=O)C=C3)=C(O)C=C2)C=C1)C4=CC=CC=C4	OC1=CC=C(C(C)(C)C2=CC=C(OCC3=CN(CC4=CC=C(C5=CC=C(CN6N=NC=C6)C=C5)C=C4)N=N3)C=C2)C=C1	0.9	18.3871	306.328	6.36322	1.52688	2.88959
706	O=S(C1=CC=CC=C1)(O)=O	O=S(C1=C(C2=NC3=C(C=C(N=CS4)C4=C3)S2)C=CC=C1)(C5=CC=CC=C5)=O	0.7	17.6549	283.81	6.11444	1.32601	2.88742
951	O=C(C1=CC=C(OC2=CC=C(S(=O)(O)=O)C=C2)C=C1)C3=CC=CC=C3	O=C(C1=CC=C(OC2=CC=C(C(C3=CC=CC=C3C4=NC(C=CC=C5)=C5N4)C6=CC=C(O)C=C6)C=C2)C=C1)C7=CC=CC=C7	0.7	17.5837	281.611	6.09095	1.19234	2.88686
1760	OC1=CC=CC(OC2=CC=C(C=CC=C3)C3=C2)=C1C(C4=C(S(=O)(O)=O)C=CC=C4)=O	O=C1N(C2=CC=CC=C2C(F)(F)F)C(C3=CC=CC4=C3C1=CC=C4)=O	0.8	20.1416	285.516	6.97783	1.14812	2.88651
1116	O=S(C1=CC=CC(C2=CC=CC(S(=O)(O)=O)=C2)=C1)(O)=O	SC1=CC(C=C2)=C(C=C1)C=C2SC3=C(C#N)C=CC=C3	0.7	18.4928	285.1	6.41057	1.26129	2.88474
241	C=C(C1=CC(S(=O)(O)=O)=CC=C1)C2=CC=CC=C2	O=C(C1=CC=C(C(C2=CC=C(OC3=CC=C(O)C(C(C)(C)C)=C3)C=C2)=O)C=C1)C4=CC=CC=C4	0.5	18.9934	286.354	6.58896	1.17912	2.88261
812	O=C(C1=CC=C(OC2=CC=C(P(C3=CC=C(O)C=C3)(C4=CC=CC=C4)=O)C=C2)C(S(=O)(O)=O)=C1)C5=CC(S(=O)(O)=O)=CC=C5	O=C(C1=CC(C(C2=CC=CC=C2)=O)=CC=C1)C(C=C3)=CC=C3OC4=CC=C(C5=CC=C(O)C=C5)C=C4	0.7	18.0997	346.384	6.28128	1.09906	2.88153
2877	O=C(C1=CC=C(OC2=CC(C3=CC(OC)=C(S(=O)(O)=O)C=C3)=C(O)C=C2)C=C1)C4=CC=CC=C4	O=C(N1)C2=C(C(C1=O)=CC=C3)C3=C(C4=C(C=CC=C5C6=O)C5=C(C(N6C7=CC(C(F)(F)F)=C(OC8=CC=C(OC9=CC=CC=C9C(F)(F)F)C=C8)C=C7)=O)C=C4)C=C2	0.9	17.6345	307.481	6.1242	1.58125	2.87947
1644	O=C(C1=CC=C(OC2=CC=C(S(=O)(O)=O)C=C2)C=C1)C3=CC=CC=C3	O=C(C1=CC=C(OC2=CC=C(C(C3=CC=CC=C3C4=NC(C=CC=C5)=C5N4)C6=CC=C(O)C=C6)C=C2)C=C1)C7=CC=CC=C7	0.8	18.4792	304.242	6.41852	1.18718	2.87904
1675	O=C(C1=CC=C(OC2=CC=C(S(=O)(O)=O)C=C2)C=C1)C3=CC=CC=C3	O=P(C1=CC=C(SC2=CC=C(C(C(F)(F)F)(C(F)(F)F)C3=CC=C(S)C=C3)C=C2)C=C1)(C4=CC=CC=C4)C5=CC=CC=C5	0.8	17.6839	316.334	6.14332	1.17501	2.87856
2964	O=C(C1=CC=C(OC2=CC=C(S(=O)(O)=O)C=C2)C=C1)C3=CC=CC=C3	O=C(C1=CC=C(OC2=CC=C(C(C)(C)C3=CC=CC=C3)C=C2)C=C1)C(C=C4)=CC=C4OC5=CC=C(C(C)(C)C6=CC=C(O)C=C6)C=C5	0.9	19.8927	312.929	6.91116	1.22618	2.87835
1811	OC1=CC=CC(OC2=CC=C(C=CC=C3)C3=C2)=C1C(C4=C(S(=O)(O)=O)C=CC=C4)=O	O=S(C1=CC=C(O)C=C1)(C2=CC=C(OC3=CC=CC=C3)C=C2)=O	0.8	20.3253	305.568	7.06585	1.14011	2.87655
26	OC1=C(S(=O)(O)=O)C=C(C=C(S(=O)(O)=O)C(OC2=CC=CC=C2C#N)=C3)C3=C1	OC1=CC=C(C(C2=CC=C(OC3=CC=C(C(C4=CC=CC=C4)=O)C=C3)C=C2)=O)C=C1	0.3	18.5396	300.12	6.44657	1.16523	2.87589
1373	O=C(C1=CC=C(OC2=CC=C(P(C3=CC=C(O)C=C3)(C4=CC=CC=C4)=O)C=C2)C(S(=O)(O)=O)=C1)C5=CC(S(=O)(O)=O)=CC=C5	OC(C=C1)=CC=C1C2=CC=C(OC3=CC(N=C4C5=CC=CC=C5)=C(C=C3)N=C4C6=CC=C(OC7=NC8=C(N=C7C9=CC=CC=C9)C=CC=C8)C=C6)C=C2	0.8	18.4792	348.366	6.42626	1.34296	2.87558
2908	O=C(C1=CC=C(OC2=CC(C3=CC(OC)=C(S(=O)(O)=O)C=C3)=C(O)C=C2)C=C1)C4=CC=CC=C4	O=C(NC1=O)C2=CC=C3C4=C2C1=CC=C4C(N(C5=CC=C(C(C6=CC=CC=C67)(C8=CC=CC=C8)C9=C7C=CC=C9)C=C5)C3=O)=O	0.9	18.477	298.902	6.42662	1.4007	2.87508
2960	O=C(C1=CC=C(OC2=CC=C(S(=O)(O)=O)C=C2)C=C1)C3=CC=CC=C3	[H]/C([H])=C/C(C(F)=C1F)=C(C(F)=C1OC2=CC(C3=CC=C(C(OC4=C(C(F)=C(C(F)=C4F)/C=C([H])\[H])F)=C3)N5C(C6=CC=C(C7=C8C=CC(C5=O)=C67)C(NC8=O)=O)=O)=CC=C2)F	0.9	19.7574	276.093	6.87549	1.3348	2.87361
3366	OC1=CC=CC(OC2=CC=C(C=CC=C3)C3=C2)=C1C(C4=C(S(=O)(O)=O)C=CC=C4)=O	O=C(C1=C2C(C=CC=C23)=CC=C1)N(C4=CC=CC(C(C5=CC=CC=C5)=O)=C4)C3=O	0.9	20.4388	304.684	7.12052	1.09947	2.87041
2976	O=C(C1=CC=C(OC2=CC=C(S(=O)(O)=O)C=C2)C=C1)C3=CC=CC=C3	O=C1C(C=CC=C2)=C2C(C3=CC=C(O)C=C3)(N1C4=CC=CC=C4)C5=CC=C(OC(C(C(F)(F)F)=C6)=CC=C6C7=CC=C(C8=CC=C(C9=CC=CC(C(F)(F)F)=C9)C=C8)C=C7)C=C5	0.9	18.7911	309.811	6.55287	1.53165	2.86761
1798	OC1=CC=CC(OC2=CC=C(C=CC=C3)C3=C2)=C1C(C4=C(S(=O)(O)=O)C=CC=C4)=O	O=S(C1=CC=C(S(=O)(O)=O)C=C1)(O)=O	0.8	20.5738	298.417	7.17636	0.996342	2.86688
1197	O=S(C1=CC=CC(S(=O)(O)=O)=C1)(C2=CC=C(OC3=CC=C(C4=CC=CC=C4)C=C3)C(S(=O)(O)=O)=C2)=O	O=C(N1)C2=C(C(C1=O)=CC=C3)C3=C(C4=C(C=CC=C5C6=O)C5=C(C(N6C7=CC=C(OC8=CC=C(C9=CC=C(OC%10=CC=CC=C%10)C=C9)C=C8)C=C7)=O)C=C4)C=C2	0.8	17.526	322.467	6.11806	0.678694	2.86463
1739	OC1=CC=CC(OC2=CC=C(C=CC=C3)C3=C2)=C1C(C4=C(S(=O)(O)=O)C=CC=C4)=O	O=S(C(C=C1)=CC=C1OC(C=C2)=CC=C2C3=CC=C(O)C=C3)(C4=CC=CC=C4)=O	0.8	20.2114	307.375	7.05597	1.12915	2.86444
1	O=S(C1=CC=CC=C1)(O)=O	O=S(C1=CC=C(O)C=C1)(C2=CC=C(OC3=CC=C(C(C4=CC=CC=C4)=O)C=C3)C=C2)=O	0.2	19.7974	332.689	6.92161	1.06364	2.86023
3078	O=C(C1=CC=C(OC2=CC=C(S(=O)(O)=O)C=C2)C=C1)C3=CC=CC=C3	O=C(NC1=O)C2=C(C1=CC=C3C(N(C4=CC=C(OC5=C(C(F)(F)F)C=C(C6=CC=C(C7=CC=C(OC8=CC=CC=C8)C(C(F)(F)F)=C7)C=C6)C=C5)C=C4)C9=O)=O)C3=C9C=C2	0.9	19.4644	277.009	6.80761	1.4893	2.85921
3004	O=C(C1=CC=C(OC2=CC=C(S(=O)(O)=O)C=C2)C=C1)C3=CC=CC=C3	O=C(N(C1=O)C2=CC=C(C(C=C3C(F)(F)F)=CC=C3OC(C=C4)=CC=C4OC(C=C5)=C(C(F)(F)F)C=C5C6=CC=CC=C6)C=C2)C7=C8C1=CC=C(C(NC9=O)=O)C8=C9C=C7	0.9	19.5023	278.203	6.82411	1.48042	2.85786
1801	OC1=CC=CC(OC2=CC=C(C=CC=C3)C3=C2)=C1C(C4=C(S(=O)(O)=O)C=CC=C4)=O	OC1=CC=C(S(C2=CC=C(OC3=CC=C(C4=CC=CC=C4)C=C3)C=C2)(=O)=O)C=C1	0.8	20.5004	305.737	7.17338	1.12878	2.85784
2853	O=C(C1=CC=C(OC2=CC(C3=CC(OC)=C(S(=O)(O)=O)C=C3)=C(O)C=C2)C=C1)C4=CC=CC=C4	NC1=CC=C(C2(C3=CC=C(NC(CCCCCCC=O)=O)C=C3)C4=CC=CC=C4C5=C2C=CC=C5)C=C1	0.9	20.5197	304.194	7.18086	1.35074	2.85755
1196	O=S(C1=CC=CC(S(=O)(O)=O)=C1)(C2=CC=C(OC3=CC=C(C4=CC=CC=C4)C=C3)C(S(=O)(O)=O)=C2)=O	O=C(NC1=O)C2=C(C1=CC=C3)C3=C(C4=C(C=CC=C5C(N(C6=CC=C(OC7=CC=CC=C7)C=C6)C8=O)=O)C5=C8C=C4)C=C2	0.8	18.1161	306.104	6.34096	0.672286	2.857
954	O=C(C1=CC=C(OC2=CC=C(S(=O)(O)=O)C=C2)C=C1)C3=CC=CC=C3	OC(C=C1)=CC=C1C(C)(C)C(C=C2)=CC=C2OC3=CC=C(C(C4=CC=CC=C4)=O)C=C3	0.7	20.476	318.195	7.17244	1.18919	2.85482
86	O=S(C1=CC(C2=NC3=C(C=C(N=CS4)C4=C3)S2)=CC5=C(S(=O)(O)=O)C=CC=C51)(O)=O	O=C(C1=CC(C2=C(OC)C=CC=C2)=C(OC)C=C1)C(C=C3)=CC=C3OC4=CC=C(C(O)=O)C=C4	0.4	18.1527	305.152	6.36024	1.20178	2.85409
2886	O=C(C1=CC=C(OC2=CC(C3=CC(OC)=C(S(=O)(O)=O)C=C3)=C(O)C=C2)C=C1)C4=CC=CC=C4	O=C(NC1=O)C2=CC=C3C4=C2C1=CC=C4C(N(C5=NC=NN5)C3=O)=O	0.9	21.0001	293.272	7.35921	1.4033	2.85358
2910	O=C(C1=CC=C(OC2=CC(C3=CC(OC)=C(S(=O)(O)=O)C=C3)=C(O)C=C2)C=C1)C4=CC=CC=C4	O=C(NC1=O)C2=CC=C3C4=C2C1=CC=C4C(N(CCCCCCCCCC)C3=O)=O	0.9	21.1111	301.679	7.4001	1.41749	2.85282
1354	O=C(C1=CC=C(OC2=CC=C(P(C3=CC=C(O)C=C3)(C4=CC=CC=C4)=O)C=C2)C(S(=O)(O)=O)=C1)C5=CC(S(=O)(O)=O)=CC=C5	O=S(C1=C(C2=NC3=C(C=C(N=CS4)C4=C3)S2)C=CC=C1)(C5=CC=CC=C5)=O	0.8	19.1512	325.609	6.71355	1.07226	2.85262
1777	OC1=CC=CC(OC2=CC=C(C=CC=C3)C3=C2)=C1C(C4=C(S(=O)(O)=O)C=CC=C4)=O	O=C(NC1=O)C2=CC=C3C4=C2C1=CC=C4C(N(C5=CC=C(OC6=CC=CC=C6)C=C5)C3=O)=O	0.8	19.7744	301.863	6.93384	1.12616	2.85187
414	O=C(C1=CC=C(OC2=CC=C(P(C3=CC=C(O)C=C3)(C4=CC=CC=C4)=O)C=C2)C(S(=O)(O)=O)=C1)C5=CC(S(=O)(O)=O)=CC=C5	O=C(C1=CC(C2=C(OC)C=CC=C2)=C(OC)C=C1)C(C=C3)=CC=C3OC4=CC=C(C(O)=O)C=C4	0.6	18.8624	334.235	6.61421	1.26574	2.8518
2909	O=C(C1=CC=C(OC2=CC(C3=CC(OC)=C(S(=O)(O)=O)C=C3)=C(O)C=C2)C=C1)C4=CC=CC=C4	O=S(C1=CC=C(S(=O)(O)=O)C=C1)(O)=O	0.9	21.096	311.766	7.39787	1.38785	2.85163
2881	O=C(C1=CC=C(OC2=CC(C3=CC(OC)=C(S(=O)(O)=O)C=C3)=C(O)C=C2)C=C1)C4=CC=CC=C4	O=C(NC1=O)C2=CC=C3C4=C2C1=CC=C4C(N(C5=CC=C(OC6=CC=CC=C6)C=C5)C3=O)=O	0.9	20.1149	306.309	7.06064	1.41469	2.84887
786	O=C(C1=CC=C(OC2=CC=C(P(C3=CC=C(O)C=C3)(C4=CC=CC=C4)=O)C=C2)C(S(=O)(O)=O)=C1)C5=CC(S(=O)(O)=O)=CC=C5	OC1=CC=C(C2=CC=C(OC3=CC=C(S(=O)(C4=CC=C(OC5=CC=C(C6=CC=C(O)C=C6)C=C5)C=C4)=O)C=C3)C=C2)C=C1	0.7	18.4301	346.718	6.4711	1.19446	2.84807
1803	OC1=CC=CC(OC2=CC=C(C=CC=C3)C3=C2)=C1C(C4=C(S(=O)(O)=O)C=CC=C4)=O	O=S(C1=CC=CC=C1)(C2=CC=C(OC3=CC=C(C=C(O)C=C4)C4=C3)C=C2)=O	0.8	20.3574	306.205	7.15294	1.09353	2.84602
511	O=C(C1=CC=C(OC2=CC=C(S(=O)(O)=O)C=C2)C=C1)C3=CC=CC=C3	O=S(C1=CC=C(O)C=C1)(C2=CC=C(OC3=CC=C(C=CC=C4)C4=C3)C=C2)=O	0.6	17.9543	326.149	6.31042	1.01795	2.84517
1330	O=C(C1=CC=C(OC2=CC=C(P(C3=CC=C(O)C=C3)(C4=CC=CC=C4)=O)C=C2)C(S(=O)(O)=O)=C1)C5=CC(S(=O)(O)=O)=CC=C5	C1(C2=CC3=CC=CC=C3C=C2)=NC4=CC=C(C5=CC=C(NC=N6)C6=C5)C=C4N1	0.8	17.7059	305.332	6.22879	1.07458	2.8426
2834	O=C(C1=CC=C(OC2=CC(C3=CC(OC)=C(S(=O)(O)=O)C=C3)=C(O)C=C2)C=C1)C4=CC=CC=C4	O=S(C1=CC=CC=C1)(C2=CC=C(C=C2)OC3=CC=C(C=C3C4=CC=CC=C4)C(C)(C5=CC=C(C(C6=CC=CC=C6)=C5)O)C)=O	0.9	18.6437	321.076	6.56201	1.42235	2.84116
2952	O=C(C1=CC=C(OC2=CC(C3=CC(OC)=C(S(=O)(O)=O)C=C3)=C(O)C=C2)C=C1)C4=CC=CC=C4	CCCCCCN(C1=O)C(C2=CC=CC(C2=C1C=C3)=C3C4=C5C(C6=CC=C5)=C(C(NC6=O)=O)C=C4)=O	0.9	20.0682	298.768	7.06368	1.35619	2.84104
2835	O=C(C1=CC=C(OC2=CC(C3=CC(OC)=C(S(=O)(O)=O)C=C3)=C(O)C=C2)C=C1)C4=CC=CC=C4	O=S(C1=CC=CC=C1)(C2=CC=C(C=C2)OC3=CC=C(C=C3)C(C4=CC=CC=C4)(C5=CC=CC=C5)C6=CC=C(C=C6)O)=O	0.9	18.6248	321.197	6.55766	1.43595	2.84016
3086	O=C(C1=CC=C(OC2=CC=C(S(=O)(O)=O)C=C2)C=C1)C3=CC=CC=C3	O=C(C1=CC=C(OC2=CC=C(C(C)(C3=CC=CC(C(C)(C)C4=CC=C(O)C=C4)=C3)C)C=C2)C=C1)C5=CC=CC=C5	0.9	20.739	311.82	7.30243	1.20934	2.84002
1787	OC1=CC=CC(OC2=CC=C(C=CC=C3)C3=C2)=C1C(C4=C(S(=O)(O)=O)C=CC=C4)=O	O=S(C1=CC=CC=C1)(C2=CC=C(OC3=CC=C(O)C=C3)C=C2)=O	0.8	20.1673	307.067	7.10209	1.11749	2.83963
3067	O=C(C1=CC=C(OC2=CC=C(S(=O)(O)=O)C=C2)C=C1)C3=CC=CC=C3	OC1=CC=C(C(C)(C)C2=CC=C(OCC3=CN(CC4=CC=C(C5=CC=C(CN6N=NC=C6)C=C5)C=C4)N=N3)C=C2)C=C1	0.9	19.1517	290.605	6.74467	1.27023	2.83952
2873	O=C(C1=CC=C(OC2=CC(C3=CC(OC)=C(S(=O)(O)=O)C=C3)=C(O)C=C2)C=C1)C4=CC=CC=C4	O=C(C1=CC(C2=C(OC)C=CC=C2)=C(OC)C=C1)C(C=C3)=CC=C3OC4=CC=C(C(O)=O)C=C4	0.9	19.667	313.207	6.9288	1.43959	2.83844
957	O=C(C1=CC=C(OC2=CC=C(S(=O)(O)=O)C=C2)C=C1)C3=CC=CC=C3	OC(C=C1)=CC=C1C(C(F)(F)F)(C(F)(F)F)C(C=C2)=CC=C2OC3=CC=C(C(C4=CC=CC=C4)=O)C=C3	0.7	19.3856	320.457	6.83617	1.2231	2.83573
999	O=C(NC1=O)C2=CC=C3C4=C2C1=CC=C4C(N(C5=CC=C(OC6=CC(C=C(OC7=CC=CC=C7)C(S(=O)(O)=O)=C8)=C8C=C6S(=O)(O)=O)C=C5)C3=O)=O	OC(C=C1)=CC=C1C(C=C2)=CC=C2OC3=C(C#N)C=CC=C3	0.7	19.2762	300.289	6.79801	1.12245	2.83557
1114	O=S(C1=CC=CC(C2=CC=CC(S(=O)(O)=O)=C2)=C1)(O)=O	O=C(C1=CC(C(C2=CC=CC=C2)=O)=CC=C1)C(C=C3)=CC=C3OC4=CC=C(C5=CC=C(O)C=C5)C=C4	0.7	17.9431	273.067	6.33225	1.16925	2.8336
2885	O=C(C1=CC=C(OC2=CC(C3=CC(OC)=C(S(=O)(O)=O)C=C3)=C(O)C=C2)C=C1)C4=CC=CC=C4	O=C(NC1=O)C2=CC=C3C4=C2C1=CC=C4C(N(C5=CC6=C(NC7=C6C=C(C)C=C7)C=C5)C3=O)=O	0.9	20.7991	302.003	7.34041	1.39428	2.83351
2841	O=C(C1=CC=C(OC2=CC(C3=CC(OC)=C(S(=O)(O)=O)C=C3)=C(O)C=C2)C=C1)C4=CC=CC=C4	O=C(C1=CC=C(OC2=C(C=CC=C3C(N(C4=CC=CC=C4C)C5=O)=O)C3=C5C=C2)C=C1)C6=CC=CC=C6	0.9	19.0173	309.877	6.7134	1.42309	2.83274
972	O=C(C1=CC=C(OC2=CC=C(S(=O)(O)=O)C=C2)C=C1)C3=CC=CC=C3	OC1=CC=C(C(C(C=C2)=CC=C2OC(C=C3)=CC=C3C(CCC(O)=O)(C)C4=CC=CC=C4)=O)C=C1	0.7	20.5514	314.396	7.25842	1.21674	2.83138
2851	O=C(C1=CC=C(OC2=CC(C3=CC(OC)=C(S(=O)(O)=O)C=C3)=C(O)C=C2)C=C1)C4=CC=CC=C4	O=C(C1=CC=C(C(C2=CC=CC=C2)=O)C=C1)C(C=C3)=CC=C3OC(C(C)=C4)=C(C)C=C4C5=CC(C)=C(O)C(C)=C5	0.9	19.1142	318.526	6.7516	1.42673	2.83106
264	O=S(C1=CC=CC(S(=O)(O)=O)=C1)(C2=CC=C(OC3=CC=C(O)C=C3)C(S(=O)(O)=O)=C2)=O	OC(C=C1)=CC=C1P(C(C=C2)=CC=C2OC(C=C3)=CC=C3C(C4=CC=CC(C(C5=CC=CC=C5)=O)=C4)=O)(C6=CC=CC=C6)=O	0.5	19.0718	347.765	6.7395	1.06647	2.82985
1812	OC1=CC=CC(OC2=CC=C(C=CC=C3)C3=C2)=C1C(C4=C(S(=O)(O)=O)C=CC=C4)=O	O=C(C1=CC(C(C2=CC=CC=C2)=O)=CC=C1)C(C=C3)=CC=C3OC4=CC=C(C5=CC=C(O)C=C5)C=C4	0.8	19.0443	313.465	6.73376	1.19997	2.82819
1814	OC1=CC=CC(OC2=CC=C(C=CC=C3)C3=C2)=C1C(C4=C(S(=O)(O)=O)C=CC=C4)=O	OC1=CC=C(C2=CC=C(C3=CC=CC=C3C#N)C=C2)C=C1	0.8	20.2645	307.513	7.16597	1.13246	2.82788
339	O=S(C1=CC(S(=O)(O)=O)=CC=C1)(C2=CC(S(=O)(O)=O)=C(SC3=CC=C(SC4=CC=C(S)C=C4)C=C3)C=C2)=O	SC1=CC=C(SC2=CC=C(SC3=CC=C(S(C4=CC=CC=C4)(=O)=O)C=C3)C=C2)C=C1	0.5	18.1891	336.681	6.43521	1.10291	2.82649
3094	O=C(C1=CC=C(OC2=CC=C(S(=O)(O)=O)C=C2)C=C1)C3=CC=CC=C3	O=C(N(C1=CC(C(C(F)(F)F)(C(F)(F)F)C2=CC=C(OC3=C(F)C(F)=C(C=C)C(F)=C3F)C=C2)=CC=C1OC4=C(F)C(F)=C(C=C)C(F)=C4F)C5=O)C6=CC=C7C8=C6C5=CC=C8C(NC7=O)=O	0.9	19.6461	274.286	6.95126	1.4906	2.82627
996	O=C(NC1=O)C2=CC=C3C4=C2C1=CC=C4C(N(C5=CC=C(OC6=CC(C=C(OC7=CC=CC=C7)C(S(=O)(O)=O)=C8)=C8C=C6S(=O)(O)=O)C=C5)C3=O)=O	O=C(N1)C2=C(C(C1=O)=CC=C3C4=O)C3=C(C(N4C5=CC=C(OC6=CC=C(C7=CC=C(OC8=CC=CC=C8)C=C7)C=C6)C=C5)=O)C=C2	0.7	19.7764	292.969	6.9985	1.17607	2.82581
1740	OC1=CC=CC(OC2=CC=C(C=CC=C3)C3=C2)=C1C(C4=C(S(=O)(O)=O)C=CC=C4)=O	FC(C(C1=CC=C(C2=NC3=C(C=C(N=CS4)C4=C3)S2)C=C1)(C(F)(F)F)C5=CC=CC=C5)(F)F	0.8	19.0956	320.27	6.75834	1.18279	2.82549
2991	O=C(C1=CC=C(OC2=CC=C(S(=O)(O)=O)C=C2)C=C1)C3=CC=CC=C3	O=C(C1=CC=C(C2=C(C=CC=C34)C3=C(C(N(C4=N5)C6=C5C=CC(OC7=CC=C(C8=CC=C(O)C=C8)C=C7)=C6)=O)C=C2)C9=C1C%10=CC=C9)N%11C%10=NC%12=C%11C=CC=C%12	0.9	19.2657	280.978	6.82093	1.39021	2.8245
3006	O=C(C1=CC=C(OC2=CC=C(S(=O)(O)=O)C=C2)C=C1)C3=CC=CC=C3	O=C(NC1=O)C2=CC=C3C4=C2C1=CC=C4C(N(C5=CC=C(OC6=C(C(F)(F)F)C=C(C7=CC=C(C8=CC=C(C9=CC=C(OC%10=CC=CC=C%10)C(C(F)(F)F)=C9)C=C8)C=C7)C=C6)C=C5)C3=O)=O	0.9	19.1208	279.283	6.76985	1.49047	2.82441
3270	OC1=CC=CC(OC2=CC=C(C=CC=C3)C3=C2)=C1C(C4=C(S(=O)(O)=O)C=CC=C4)=O	O=C(C1=CC=C(OC2=CC=C(P(C3=CC=C(O)C=C3)(C4=CC=CC=C4)=O)C=C2)C=C1)C5=CC=CC=C5	0.9	20.4368	316.904	7.24028	1.13472	2.82265
3070	O=C(C1=CC=C(OC2=CC=C(S(=O)(O)=O)C=C2)C=C1)C3=CC=CC=C3	OC(C=C1)=CC=C1C(C(F)(F)F)(C(F)(F)F)C(C=C2)=CC=C2OC3=NC4=CC(C(C(F)(F)F)(C(F)(F)F)C5=CC6=C(C=C5)OC(C7=CC=CC=C7)=N6)=CC=C4O3	0.9	19.3614	304.924	6.86016	1.22321	2.82229
1627	O=C(C1=CC=C(OC2=CC=C(S(=O)(O)=O)C=C2)C=C1)C3=CC=CC=C3	O=S(C1=CC=CC=C1)(C2=CC=C(C=C2)OC3=CC=C(C=C3C4=CC=CC=C4)C(C)(C5=CC=C(C(C6=CC=CC=C6)=C5)O)C)=O	0.8	18.5816	319.081	6.584	1.18727	2.82223
1254	O=C(C1=CC=C(OC2=CC=CC=C2)C=C1)C3=CC(C4=C(C=CC=C4)OCCCS(=O)(O)=O)=C(C=C3)OCCCS(=O)(O)=O	SC1=CC(C=C2)=C(C=C1)C=C2SC3=C(C#N)C=CC=C3	0.8	18.7336	268.261	6.63813	1.25566	2.82213
2898	O=C(C1=CC=C(OC2=CC(C3=CC(OC)=C(S(=O)(O)=O)C=C3)=C(O)C=C2)C=C1)C4=CC=CC=C4	O=C(C1=CC=CC(C=O)=C1)NC(C=C2)=CC=C2OC3=C(C#N)C(OC4=CC=C(N)C=C4)=CC=C3	0.9	19.3729	308.713	6.86588	1.44007	2.82162
3081	O=C(C1=CC=C(OC2=CC=C(S(=O)(O)=O)C=C2)C=C1)C3=CC=CC=C3	O=C(NC1=O)C2=C(C1=CC=C3C(N(C4=CC=C(OC5=C(C(F)(F)F)C=C(C6=CC=C(C7=CC=C(OC8=CC=CC=C8)C(C(F)(F)F)=C7)S6)C=C5)C=C4)C9=O)=O)C3=C9C=C2	0.9	19.4879	276.939	6.90925	1.48408	2.82055
523	O=C(C1=CC=C(OC2=CC=C(S(=O)(O)=O)C=C2)C=C1)C3=CC=CC=C3	O=S(C1=CC=C(O)C=C1)(C2=CC=C(OC3=CC=CC=C3)C=C2)=O	0.6	17.9874	327.621	6.37985	1.14838	2.81941
334	O=S(C1=CC=CC(S(=O)(O)=O)=C1)(C2=CC(S(=O)(O)=O)=C(SC3=CC(C=CC(S)=C4)=C4C=C3)C=C2)=O	O=C(C1=CC=CC=C1)C2=CC=C(C(C3=CC=CC=C3)=O)C=C2	0.5	20.0798	282.18	7.12297	1.16786	2.81902
2863	O=C(C1=CC=C(OC2=CC(C3=CC(OC)=C(S(=O)(O)=O)C=C3)=C(O)C=C2)C=C1)C4=CC=CC=C4	O=C(C1=CC=C(OC2=CC=C(C(C3=CC=CC=C3C(O)=O)C4=CC=C(O)C=C4)C=C2)C=C1)C5=CC=CC=C5	0.9	19.0399	318.585	6.75525	1.44581	2.81854
2927	O=C(C1=CC=C(OC2=CC(C3=CC(OC)=C(S(=O)(O)=O)C=C3)=C(O)C=C2)C=C1)C4=CC=CC=C4	OC(C=C1)=CC=C1C(C(F)(F)F)(C(F)(F)F)C(C=C2)=CC=C2OC3=NC4=CC(C(C(F)(F)F)(C(F)(F)F)C5=CC6=C(C=C5)OC(C7=CC=CC=C7)=N6)=CC=C4O3	0.9	17.7933	310.945	6.31863	1.46503	2.81601
1826	OC1=CC=CC(OC2=CC=C(C=CC=C3)C3=C2)=C1C(C4=C(S(=O)(O)=O)C=CC=C4)=O	O=C(C1=CC=C(C2=CC=C(OC3=CC=CC=C3)C=C2)C=C1)C4=CC=CC=C4	0.8	20.3112	314.607	7.21461	1.13056	2.81528
333	O=S(C1=CC=CC(S(=O)(O)=O)=C1)(C2=CC(S(=O)(O)=O)=C(SC3=CC(C=CC(S)=C4)=C4C=C3)C=C2)=O	SC1=CC=C(SC2=CC=C(SC3=CC=C(S(C4=CC=CC=C4)(=O)=O)C=C3)C=C2)C=C1	0.5	18.5026	337.085	6.57412	1.09136	2.81446
1786	OC1=CC=CC(OC2=CC=C(C=CC=C3)C3=C2)=C1C(C4=C(S(=O)(O)=O)C=CC=C4)=O	O=S(C1=CC=CC=C1)(C2=CC=C(OC3=CC=C(O)C(C4=CC=CC=C4)=C3)C=C2)=O	0.8	20.2643	311.308	7.20848	1.13712	2.81117
2844	O=C(C1=CC=C(OC2=CC(C3=CC(OC)=C(S(=O)(O)=O)C=C3)=C(O)C=C2)C=C1)C4=CC=CC=C4	OC1=C(F)C(F)=C(C2=C(F)C(F)=C(OC3=CC=C(C(C(F)(F)F)(C(F)(F)F)C4=CC=CC=C4)C=C3)C(F)=C2F)C(F)=C1F	0.9	19.4295	319.914	6.9144	1.51519	2.81001
727	O=C(C1=CC=C(OC2=CC=CC=C2)C=C1)C3=CC(C4=C(C=CC=C4)OCCCS(=O)(O)=O)=C(C=C3)OCCCS(=O)(O)=O	FC(C(C1=CC=C(C2=NC3=C(C=C(N=CS4)C4=C3)S2)C=C1)(C(F)(F)F)C5=CC=CC=C5)(F)F	0.7	17.6212	288.692	6.27092	1.24448	2.80999
140	O=S(C1=CC=C(O)C(S(=O)(O)=O)=C1)(C2=CC(S(=O)(O)=O)=C(OC3=CC=C(C=C(O)C=C4)C4=C3)C=C2)=O	OC1=CC=C(C(C2=CC=C(OC3=CC=C(C(C4=CC=CC=C4)=O)C=C3)C=C2)=O)C=C1	0.4	17.5383	306.604	6.24241	1.16633	2.80954
3090	O=C(C1=CC=C(OC2=CC=C(S(=O)(O)=O)C=C2)C=C1)C3=CC=CC=C3	FC(C1=CC(C(C=C2)=CC=C2C(C=C3)=CC=C3C(C=C4)=CC(C(F)(F)F)=C4OC(C=C5)=CC=C5C6N=NC(COC(C=C7)=CC=C7OCC8=CNN=N8)=N6)=CC=C1OC9=CC=CC=C9)(F)F	0.9	18.6752	273.385	6.64993	1.52837	2.80832
2820	O=C(C1=CC=C(OC2=CC(C3=CC(OC)=C(S(=O)(O)=O)C=C3)=C(O)C=C2)C=C1)C4=CC=CC=C4	O=P(C1=CC=C(OC2=CC=C(C3=NNC(C4=C3C=CC=C4)=O)C=C2)C=C1)(C5=CC=CC=C5)C6=CC=CC=C6	0.9	18.8822	313.054	6.72874	1.42286	2.8062
3074	O=C(C1=CC=C(OC2=CC=C(S(=O)(O)=O)C=C2)C=C1)C3=CC=CC=C3	O=C(NC1=O)C2=C(C1=CC=C3C(N(C4=CC=C(C5=CC(C(F)(F)F)=C(OC6=CC=C(C7(C8=CC=C(OC9=CC=C(C%10=CC=CC=C%10)C=C9C(F)(F)F)C(OC)=C8)C%11=C(C=CC=C%11)C%12=CC=CC=C7%12)C=C6OC)C=C5)C=C4)C%13=O)=O)C3=C%13C=C2	0.9	19.0223	276.655	6.77911	1.47618	2.80602
182	C=C(C1=CC=C(C(S(=O)(O)=O)=C1)F)C2=CC=C(C(S(=O)(O)=O)=C2)OC3=CC=C(C=C3)C4=CC=C(C=C4)OC5=CC=C(C=C5S(=O)(O)=O)C(C6=CC=C(C(S(=O)(O)=O)=C6)F)=C	O=C(C1=CC(C(C2=CC=CC=C2)=O)=CC=C1)C(C=C3)=CC=C3OC4=CC=C(O)C=C4	0.5	19.4047	322.224	6.91666	1.22583	2.80551
1705	O=C(C1=CC=C(OC2=CC=C(S(=O)(O)=O)C=C2)C=C1)C3=CC=CC=C3	O=C(NC1=O)C2=C(C1=CC=C3C(N(C4=CC=C(OC5=CC=C(P(C6=CC=C(OC7=CC=CC=C7)C=C6)(C8=CC=CC=C8)=O)C=C5)C=C4)C9=O)=O)C3=C9C=C2	0.8	17.872	276.399	6.37139	1.3412	2.80503
1223	O=C(C1=CC=C(OC2=CC=CC=C2)C=C1)C3=CC(C4=C(C=CC=C4)OCCCS(=O)(O)=O)=C(C=C3)OCCCS(=O)(O)=O	C=S(C(C=C1)=CC=C1OC2=CC3=CC=CC=C3C=C2)(C4=CC=C(OC5=CC=C(C=CC(O)=C6)C6=C5)C=C4)=C	0.8	19.9636	283.378	7.12373	1.28804	2.80241
116	OC1=C(S(=O)(O)=O)C=C(C=C(S(=O)(O)=O)C(OC2=CC=CC=C2C#N)=C3)C3=C1	O=C(C1=CC(C2=C(OC)C=CC=C2)=C(OC)C=C1)C(C=C3)=CC=C3OC4=CC=C(C(O)=O)C=C4	0.4	19.6349	279.246	7.008	1.39237	2.80178
1772	OC1=CC=CC(OC2=CC=C(C=CC=C3)C3=C2)=C1C(C4=C(S(=O)(O)=O)C=CC=C4)=O	SC1=CC=C(SC2=CC=C(SC3=CC=C(S(C4=CC=CC=C4)(=O)=O)C=C3)C=C2)C=C1	0.8	18.8786	338.14	6.73911	1.04795	2.80135
1322	O=C(C1=CC=C(OC2=CC=C(P(C3=CC=C(O)C=C3)(C4=CC=CC=C4)=O)C=C2)C(S(=O)(O)=O)=C1)C5=CC(S(=O)(O)=O)=CC=C5	FC(C(C1=CC=C(C2=NC3=C(C=C(N=CS4)C4=C3)S2)C=C1)(C(F)(F)F)C5=CC=CC=C5)(F)F	0.8	18.6747	323.007	6.67427	1.14312	2.79801
3340	OC1=CC=CC(OC2=CC=C(C=CC=C3)C3=C2)=C1C(C4=C(S(=O)(O)=O)C=CC=C4)=O	O=P(C1=CC=C(OC2=CC=C(O)C=C2)C=C1)(C3=CC=CC=C3)C4=CC=CC=C4	0.9	20.5727	315.727	7.35814	1.07019	2.79591
633	OC1=CC2=C(C=C(S(=O)(O)=O)C=C2OC3=CC=CC=C3C#N)C=C1	O=C(C1=CC=CC(C=O)=C1)NC(C=C2)=CC=C2OC3=C(C#N)C(OC4=CC=C(N)C=C4)=CC=C3	0.6	17.737	271.963	6.34423	1.36225	2.79577
809	O=C(C1=CC=C(OC2=CC=C(P(C3=CC=C(O)C=C3)(C4=CC=CC=C4)=O)C=C2)C(S(=O)(O)=O)=C1)C5=CC(S(=O)(O)=O)=CC=C5	O=C(C1=C2C(C=CC=C23)=CC=C1)N(C4=CC=CC(C(C5=CC=CC=C5)=O)=C4)C3=O	0.7	17.6503	276.803	6.31353	1.11831	2.79564
1795	OC1=CC=CC(OC2=CC=C(C=CC=C3)C3=C2)=C1C(C4=C(S(=O)(O)=O)C=CC=C4)=O	O=S(C1=CC=C(OC2=CC=CC=C2C3=CC=C(F)C=C3)C=C1)(C4=CC=C(O)C=C4)=O	0.8	19.8611	309.654	7.1104	1.15692	2.79325
1434	O=C(C1=CC=C(OC2=CC=C(P(C3=CC=C(O)C=C3)(C4=CC=CC=C4)=O)C=C2)C(S(=O)(O)=O)=C1)C5=CC(S(=O)(O)=O)=CC=C5	O=C1C(C=CC=C2)=C2C(C(C=C3)=CC=C3OC(C=C4)=CC=C4C(N5)=NC(C5=C6)=CC=C6C7=CC(N=CN8)=C8C=C7)=NN1C9=CC=CC=C9	0.8	19.0482	310.684	6.82141	1.16145	2.79242
1732	OC1=CC=CC(OC2=CC=C(C=CC=C3)C3=C2)=C1C(C4=C(S(=O)(O)=O)C=CC=C4)=O	O=S(C1=CC=CC=C1)(C2=CC=C(OC3=CC=C(O)C(C4=CC(F)=C(F)C=C4)=C3)C=C2)=O	0.8	19.7445	310.217	7.07077	1.12301	2.7924
349	O=S(C1=CC=CC(S(=O)(O)=O)=C1)(C2=CC=C(OC3=CC=C(C4=CC=CC=C4)C=C3)C(S(=O)(O)=O)=C2)=O	O=C(C1=CC=C(C(C2=CC=CC=C2)=O)C=C1)C(C=C3)=CC=C3OC(C(C)=C4)=C(C)C=C4C5=CC(C)=C(O)C(C)=C5	0.6	17.687	321.383	6.33424	1.10214	2.79229
3290	OC1=CC=CC(OC2=CC=C(C=CC=C3)C3=C2)=C1C(C4=C(S(=O)(O)=O)C=CC=C4)=O	O=C1N(C2=CC=CC=C2C(F)(F)F)C(C3=CC=CC4=C3C1=CC=C4)=O	0.9	20.5275	302.271	7.35291	1.11618	2.79176
2832	O=C(C1=CC=C(OC2=CC(C3=CC(OC)=C(S(=O)(O)=O)C=C3)=C(O)C=C2)C=C1)C4=CC=CC=C4	FC(C(C1=CC=CC=C1)(C(F)(F)F)C2=CC=C(C3=NC4=C(N3)C=C(C5=CC=C(NC=N6)C6=C5)C=C4)C=C2)(F)F	0.9	19.47	308.559	6.97565	1.38817	2.79114
686	O=S(C1=CC=CC(S(=O)(O)=O)=C1)(C2=CC=C(OC3=CC=C(C4=CC=CC=C4)C=C3)C(S(=O)(O)=O)=C2)=O	O=C(C1=CC=CC(C=O)=C1)NC(C=C2)=CC=C2OC3=C(C#N)C(OC4=CC=C(N)C=C4)=CC=C3	0.7	18.2001	341.675	6.52114	1.05562	2.79094
936	O=C(C1=CC=C(OC2=CC=C(S(=O)(O)=O)C=C2)C=C1)C3=CC=CC=C3	O=C(C1=CC=C(OC2=CC=C(P(C3=CC=C(O)C=C3)(C4=CC=CC=C4)=O)C=C2)C=C1)C5=CC=CC=C5	0.7	18.6957	320.101	6.70182	1.15442	2.78964
2951	O=C(C1=CC=C(OC2=CC(C3=CC(OC)=C(S(=O)(O)=O)C=C3)=C(O)C=C2)C=C1)C4=CC=CC=C4	O=C(NC1=O)C2=C(C1=CC=C3C(N(C4=CC=C(OC5=CC=C(P(C6=CC=C(OC7=CC=CC=C7)C=C6)(C8=CC=CC=C8)=O)C=C5)C=C4)C9=O)=O)C3=C9C=C2	0.9	17.9762	309.734	6.4478	1.42186	2.78795
170	O=S(C1=CC=CC(S(=O)(O)=O)=C1)(C2=CC=C(OC3=CC=C(C4=CC=CC=C4)C=C3)C(S(=O)(O)=O)=C2)=O	OC1=C(OC2=CC=C(C(C3=CC(C(C4=CC=CC=C4)=O)=CC=C3)=O)C=C2)C=C5C(C6C=CC5C6)=C1	0.5	17.7034	315.348	6.35191	1.15909	2.7871
1111	O=S(C1=CC=CC(C2=CC=CC(S(=O)(O)=O)=C2)=C1)(O)=O	SC1=CC=C(SC2=CC=C(SC3=CC=C(S(C4=CC=CC=C4)(=O)=O)C=C3)C=C2)C=C1	0.7	18.192	299.468	6.52769	1.11379	2.7869
684	O=S(C1=CC=CC(S(=O)(O)=O)=C1)(C2=CC=C(OC3=CC=C(C4=CC=CC=C4)C=C3)C(S(=O)(O)=O)=C2)=O	OC1=C(OC2=CC=C(C(C3=CC(C(C4=CC=CC=C4)=O)=CC=C3)=O)C=C2)C=C5C(C6C=CC5C6)=C1	0.7	17.7275	327.05	6.36116	1.04706	2.78684
1946	OC1=CC2=C(C=C(S(=O)(O)=O)C=C2OC3=CC=CC=C3C#N)C=C1	O=C(NC1=O)C2=C(C1=CC=C3)C3=C(C4=C(C=CC=C5C(N(C6=CC=C(N(C7=CC=CC=C7)C8=CC=CC=C8)C=C6)C9=O)=O)C5=C9C=C4)C=C2	0.8	17.5522	271.096	6.29959	1.13369	2.78625
946	O=C(C1=CC=C(OC2=CC=C(S(=O)(O)=O)C=C2)C=C1)C3=CC=CC=C3	O=C(C1=CC=CC=C1)C(C=C2)=CC=C2OC(C(C)=C3)=C(C)C=C3C4=CC(C)=C(O)C(C)=C4	0.7	20.0593	320.881	7.20573	1.16964	2.78379
1762	OC1=CC=CC(OC2=CC=C(C=CC=C3)C3=C2)=C1C(C4=C(S(=O)(O)=O)C=CC=C4)=O	O=S(C1=C(C2=NC3=C(C=C(N=CS4)C4=C3)S2)C=CC=C1)(C5=CC=CC=C5)=O	0.8	19.933	317.78	7.16915	1.09749	2.78039
56	O=S(C1=CC=CC=C1)(O)=O	O=C(C1=CC=C(C(C2=CC=C(OC3=CC=C(O)C(C(C)(C)C)=C3)C=C2)=O)C=C1)C4=CC=CC=C4	0.4	19.8449	301.553	7.13816	1.30737	2.78011
798	O=C(C1=CC=C(OC2=CC=C(P(C3=CC=C(O)C=C3)(C4=CC=CC=C4)=O)C=C2)C(S(=O)(O)=O)=C1)C5=CC(S(=O)(O)=O)=CC=C5	O=C(C1=CC(C2=C(OC)C=CC=C2)=C(OC)C=C1)C(C=C3)=CC=C3OC4=CC=C(C(O)=O)C=C4	0.7	19.1102	333.137	6.88025	1.22905	2.77755
2856	O=C(C1=CC=C(OC2=CC(C3=CC(OC)=C(S(=O)(O)=O)C=C3)=C(O)C=C2)C=C1)C4=CC=CC=C4	O=C(C1=CC=CC2=C1C3=CC=C2)N(NCCCCCCNN(C4=O)C(C5=C(C4=CC=C6)C6=CC=C5)=O)C3=O	0.9	18.6132	295.112	6.70686	1.36567	2.77525
1699	O=C(C1=CC=C(OC2=CC=C(S(=O)(O)=O)C=C2)C=C1)C3=CC=CC=C3	O=CC(C=C1)=CC=C1OC(C=C2)=CC=C2C(NC3=CC=C(OC4=CC=C(C(C5=CC=C(OC6=CC=C(N)C=C6)C=C5)(C(F)(F)F)C(F)(F)F)C=C4)C=C3)=O	0.8	18.2383	286.289	6.57193	1.21036	2.77518
417	O=S(C1=CC=CC(S(=O)(O)=O)=C1)(C2=CC=C(OC3=CC=C(C=CC(O)=C4)C4=C3)C(S(=O)(O)=O)=C2)=O	OC(C=C1)=CC=C1P(C(C=C2)=CC=C2OC(C=C3)=CC=C3C(C4=CC=CC(C(C5=CC=CC=C5)=O)=C4)=O)(C6=CC=CC=C6)=O	0.6	17.8805	333.895	6.44341	0.947003	2.77501
220	O=C(C1=CC(S(=O)(O)=O)=CC=C1)C2=CC=CC=C2	O=C(C1=CC=CC=C1)C(C=C2)=CC=C2OC(C(C)=C3)=C(C)C=C3C4=CC(C)=C(O)C(C)=C4	0.5	18.8851	291.581	6.80564	1.23115	2.77492
1622	O=C(C1=CC=C(OC2=CC=C(S(=O)(O)=O)C=C2)C=C1)C3=CC=CC=C3	OC1=CC=C(C(C(F)(F)F)(C(F)(F)F)C2=CC=C(OC3=CC=C(S(C4=CC=CC=C4)(=O)=O)C=C3)C=C2)C=C1	0.8	19.5518	314.189	7.04645	1.19599	2.7747
2080	O=S(C1=C(OC2=CC=C(C3=NC4=C(C=C(N=CS5)C5=C4)S3)C=C2S(=O)(O)=O)C=CC=C1)(O)=O	FC(C(C1=CC=C(C2=NC3=CC4=C(N=CS4)C=C3S2)C=C1)(C(F)(F)F)C5=CC=CC=C5)(F)F	0.9	17.57	389.366	6.33628	1.53684	2.77292
3273	OC1=CC=CC(OC2=CC=C(C=CC=C3)C3=C2)=C1C(C4=C(S(=O)(O)=O)C=CC=C4)=O	OC1=C(OC2=CC=C(C(C3=CC(C(C4=CC=CC=C4)=O)=CC=C3)=O)C=C2)C=C5C(C6C=CC5C6)=C1	0.9	20.7151	316.804	7.47979	1.16048	2.76948
1112	O=S(C1=CC=CC(C2=CC=CC(S(=O)(O)=O)=C2)=C1)(O)=O	O=C(C1=CC=CC(C=O)=C1)NC(C=C2)=CC=C2OC3=C(C#N)C(OC4=CC=C(N)C=C4)=CC=C3	0.7	17.696	283.583	6.39161	1.04902	2.76862
187	O=S(C1=CC=CC=C1)(O)=O	O=C(C1=CC=C(C(C2=CC=C(OC3=CC=C(O)C(C(C)(C)C)=C3)C=C2)=O)C=C1)C4=CC=CC=C4	0.5	19.7953	283.332	7.1509	1.31463	2.76822
3399	OC1=CC=CC(OC2=CC=C(C=CC=C3)C3=C2)=C1C(C4=C(S(=O)(O)=O)C=CC=C4)=O	O=C(C1=CC=C(C2=CC=C(OC3=CC=CC=C3)C=C2)C=C1)C4=CC=CC=C4	0.9	20.6613	313.448	7.46809	1.08913	2.76661
3080	O=C(C1=CC=C(OC2=CC=C(S(=O)(O)=O)C=C2)C=C1)C3=CC=CC=C3	O=C(NC1=O)C2=C(C1=CC=C3C(N(C4=CC=C(OC5=C(C(F)(F)F)C=C(C6=CC=CC(C7=CC=C(OC8=CC=CC=C8)C(C(F)(F)F)=C7)=N6)C=C5)C=C4)C9=O)=O)C3=C9C=C2	0.9	19.5528	268.237	7.06806	1.49348	2.76636
3286	OC1=CC=CC(OC2=CC=C(C=CC=C3)C3=C2)=C1C(C4=C(S(=O)(O)=O)C=CC=C4)=O	O=C(C1=CC=C(OC2=C(C=CC=C3C(N(C4=CC=CC=C4C)C5=O)=O)C3=C5C=C2)C=C1)C6=CC=CC=C6	0.9	19.6019	309.344	7.08594	1.17165	2.76631
2865	O=C(C1=CC=C(OC2=CC(C3=CC(OC)=C(S(=O)(O)=O)C=C3)=C(O)C=C2)C=C1)C4=CC=CC=C4	O=P(C1=CC=C(OC2=CC=C(C(C(F)(F)F)(C(F)(F)F)C3=CC=C(O)C=C3)C=C2)C=C1)(C4=CC=CC=C4)C5=CC=CC=C5	0.9	18.3701	322.834	6.64091	1.4269	2.7662
631	O=S(C1=CC=C(O)C(S(=O)(O)=O)=C1)(C2=CC=C(OC3=CC=CC=C3)C(S(=O)(O)=O)=C2)=O	O=C(C1=CC(C(C2=CC=CC=C2)=O)=CC=C1)C(C=C3)=CC=C3OC4=CC=C(O)C=C4	0.6	17.8193	318.835	6.44302	1.00613	2.76568
1752	OC1=CC=CC(OC2=CC=C(C=CC=C3)C3=C2)=C1C(C4=C(S(=O)(O)=O)C=CC=C4)=O	O=P(C1=CC=C(O)C=C1)(C2=CC=CC=C2)C(C=C3)=CC=C3OC(C=C4)=CC=C4S(C5=CC=CC=C5)(=O)=O	0.8	19.0415	315.064	6.88674	1.16751	2.76495
3347	OC1=CC=CC(OC2=CC=C(C=CC=C3)C3=C2)=C1C(C4=C(S(=O)(O)=O)C=CC=C4)=O	O=C(C1=CC=CC(C=O)=C1)NC(C=C2)=CC=C2OC3=C(C#N)C(OC4=CC=C(N)C=C4)=CC=C3	0.9	20.4873	303.269	7.41186	1.13789	2.76413
708	O=S(C1=CC=CC=C1)(O)=O	O=C(C1=CC=CC(C=O)=C1)NC(C=C2)=CC=C2OC3=C(C#N)C(OC4=CC=C(N)C=C4)=CC=C3	0.7	17.7794	274.509	6.43354	1.20954	2.76355
3345	OC1=CC=CC(OC2=CC=C(C=CC=C3)C3=C2)=C1C(C4=C(S(=O)(O)=O)C=CC=C4)=O	OC(C=C1)=CC=C1C(C=C2)=CC=C2OC3=C(C#N)C=CC=C3	0.9	20.4342	305.152	7.39533	1.10921	2.76312
3038	O=C(C1=CC=C(OC2=CC=C(S(=O)(O)=O)C=C2)C=C1)C3=CC=CC=C3	OC(C=C1)=CC=C1C(C(F)(F)F)(C(F)(F)F)C(C=C2)=CC=C2OC(C=C3)=CC=C3C4=NC5=CC(C(C6=CC(N=C(C7=CC=CC=C7)O8)=C8C=C6)(C(F)(F)F)C(F)(F)F)=CC=C5O4	0.9	19.0921	305.07	6.91497	1.58299	2.76098
1673	O=C(C1=CC=C(OC2=CC=C(S(=O)(O)=O)C=C2)C=C1)C3=CC=CC=C3	OC1=CC=C(S(=O)(C2=CC=C(OC3=CC=C(S(C4=CC=CC=C4)(=O)=O)C=C3)C=C2)=O)C=C1	0.8	20.7464	313.533	7.5178	1.06661	2.75964
2972	O=C(C1=CC=C(OC2=CC=C(S(=O)(O)=O)C=C2)C=C1)C3=CC=CC=C3	CC(C=C(C1=CC=C(C2=CC=C(C3=CC=C(OC4=CC=CC=C4)C(C(F)(F)F)=C3)C=C2)C=C1)C=C5)=C5OC6=CC=C(N7C=C(CCOC(C=C8)=CC=C8C(C(F)(F)F)(C(F)(F)F)C(C=C9)=CC=C9OCC%10=CNN=N%10)N=N7)C=C6	0.9	18.6768	272.025	6.77282	1.59028	2.75761
2935	O=C(C1=CC=C(OC2=CC(C3=CC(OC)=C(S(=O)(O)=O)C=C3)=C(O)C=C2)C=C1)C4=CC=CC=C4	O=C(NC1=O)C2=C(C1=CC=C3C(N(C4=CC=C(OC5=C(C(F)(F)F)C=C(C6=CC=CC(C7=CC=C(OC8=CC=CC=C8)C(C(F)(F)F)=C7)=C6)C=C5)C=C4)C9=O)=O)C3=C9C=C2	0.9	17.7009	307.006	6.42084	1.58731	2.75679
814	O=C(C1=CC=C(OC2=CC=C(P(C3=CC=C(O)C=C3)(C4=CC=CC=C4)=O)C=C2)C(S(=O)(O)=O)=C1)C5=CC(S(=O)(O)=O)=CC=C5	N=P(OC1=CC=C(F)C=C1)OC2=CC=C(OC)C=C2	0.7	18.0609	330.82	6.55741	1.17626	2.75427
30	O=S(C1=CC=CC(C2=CC=CC(S(=O)(O)=O)=C2)=C1)(O)=O	OC(C=C1)=CC=C1C(C)(C)C(C=C2)=CC=C2OC3=CC=C(C(C4=CC=CC=C4)=O)C=C3	0.3	17.604	324.213	6.39287	1.24295	2.7537
941	O=C(C1=CC=C(OC2=CC=C(S(=O)(O)=O)C=C2)C=C1)C3=CC=CC=C3	O=C(C1=CC=C(C(C2=CC=C(OC3=CC=C(O)C(C(C)(C)C)=C3)C=C2)=O)C=C1)C4=CC=CC=C4	0.7	19.766	309.37	7.18045	1.15035	2.75276
498	SC(C=C1)=CC=C1SC(C=C2)=CC=C2SC(C(S(=O)(O)=O)=C3)=CC=C3S(C4=CC(S(=O)(O)=O)=CC=C4)(=O)=O	SC1=CC(C=C2)=C(C=C1)C=C2SC3=C(C#N)C=CC=C3	0.6	19.0142	333.782	6.90737	1.17997	2.75274
937	O=C(C1=CC=C(OC2=CC=C(S(=O)(O)=O)C=C2)C=C1)C3=CC=CC=C3	OC1=C(OC2=CC=C(C(C3=CC(C(C4=CC=CC=C4)=O)=CC=C3)=O)C=C2)C=C5C(C6C=CC5C6)=C1	0.7	19.0361	307.755	6.91751	1.22125	2.75187
2959	O=C(C1=CC=C(OC2=CC=C(S(=O)(O)=O)C=C2)C=C1)C3=CC=CC=C3	O=C(C1=CC=C(OC2=CC=CC(OC3=CC=CC(OC4=CC=CC(OC5=CC=CC(OC6=CC=CC(OC7=CC=C(C(C8=CC=CC=C8)=O)C=C7)=C6)=C5C#N)=C4)=C3C#N)=C2)C=C1)C9=CC=CC=C9	0.9	17.9226	283.916	6.51494	1.41677	2.75099
690	O=S(C1=CC=CC(S(=O)(O)=O)=C1)(C2=CC=C(OC3=CC=C(C4=CC=CC=C4)C=C3)C(S(=O)(O)=O)=C2)=O	O=C(C1=CC(C(C2=CC=CC=C2)=O)=CC=C1)C(C=C3)=CC=C3OC4=CC=C(C5=CC=C(O)C=C5)C=C4	0.7	17.963	342.96	6.52992	0.984361	2.75088
222	O=C(C1=CC(S(=O)(O)=O)=CC=C1)C2=CC=CC=C2	OC(C=C1)=CC=C1C(C)(C)C(C=C2)=CC=C2OC3=CC=C(C(C4=CC=CC=C4)=O)C=C3	0.5	18.4181	289.588	6.69637	1.24148	2.75046
685	O=S(C1=CC=CC(S(=O)(O)=O)=C1)(C2=CC=C(OC3=CC=C(C4=CC=CC=C4)C=C3)C(S(=O)(O)=O)=C2)=O	O=C(C1=CC=C(C(C2=CC=C(OC3=CC=C(O)C(C(C)(C)C)=C3)C=C2)=O)C=C1)C4=CC=CC=C4	0.7	18.4418	328.282	6.70675	1.03941	2.74974
3374	OC1=CC=CC(OC2=CC=C(C=CC=C3)C3=C2)=C1C(C4=C(S(=O)(O)=O)C=CC=C4)=O	O=C(C1=CC(C(C2=CC=CC=C2)=O)=CC=C1)C(C=C3)=CC=C3OC4=CC=C(O)C=C4	0.9	20.5928	311.571	7.49222	1.09639	2.74855
1007	O=C(NC1=O)C2=CC=C3C4=C2C1=CC=C4C(N(C5=CC=C(OC6=CC(C=C(OC7=CC=CC=C7)C(S(=O)(O)=O)=C8)=C8C=C6S(=O)(O)=O)C=C5)C3=O)=O	O=C(C1=CC=C(C2=CC=C(OC3=CC=CC=C3)C=C2)C=C1)C4=CC=CC=C4	0.7	19.0819	296.012	6.94509	1.14562	2.74754
181	C=C(C1=CC=C(C(S(=O)(O)=O)=C1)F)C2=CC=C(C(S(=O)(O)=O)=C2)OC3=CC=C(C=C3)C4=CC=C(C=C4)OC5=CC=C(C=C5S(=O)(O)=O)C(C6=CC=C(C(S(=O)(O)=O)=C6)F)=C	O=C(C1=CC(C(C2=CC=CC=C2)=O)=CC=C1)C(C=C3)=CC=C3OC4=CC=C(C5=CC=C(O)C=C5)C=C4	0.5	19.2015	319.275	6.99121	1.20126	2.74652
3003	O=C(C1=CC=C(OC2=CC=C(S(=O)(O)=O)C=C2)C=C1)C3=CC=CC=C3	FC(C(C1=CC=C(OCC2=CN(C3=CC=C(OC4=C(C(F)(F)F)C=C(C5=CC=C(C6=CC=C(C7=CC=C(OC8=CC=CC=C8)C(C(F)(F)F)=C7)C=C6)C=C5)C=C4)C=C3)N=N2)C=C1)(C(F)(F)F)C(C=C9)=CC=C9OCC%10=CNN=N%10)(F)F	0.9	18.4916	272.596	6.73381	1.57944	2.74608
1185	OC1=CC(S(=O)(O)=O)=C(OC2=CC=CC=C2C#N)C=C1	O=C(C1=CC=C(OC2=C(C=CC=C3C(N(C4=CC=CC=C4C)C5=O)=O)C3=C5C=C2)C=C1)C6=CC=CC=C6	0.7	18.2486	266.858	6.65037	1.36713	2.744
3378	OC1=CC=CC(OC2=CC=C(C=CC=C3)C3=C2)=C1C(C4=C(S(=O)(O)=O)C=CC=C4)=O	N=P(OC1=CC=C(F)C=C1)OC2=CC=C(OC)C=C2	0.9	20.3854	308.444	7.43379	1.12265	2.74227
1323	O=C(C1=CC=C(OC2=CC=C(P(C3=CC=C(O)C=C3)(C4=CC=CC=C4)=O)C=C2)C(S(=O)(O)=O)=C1)C5=CC(S(=O)(O)=O)=CC=C5	OC1=CC=C(C2=CC=C(OC3=CC=C(S(=O)(C4=CC=C(OC5=CC=C(C6=CC=C(O)C=C6)C=C5)C=C4)=O)C=C3)C=C2)C=C1	0.8	19.9558	352.208	7.27815	1.13314	2.74188
3327	OC1=CC=CC(OC2=CC=C(C=CC=C3)C3=C2)=C1C(C4=C(S(=O)(O)=O)C=CC=C4)=O	O=C(C1=CC=C(CCC)C=C1)C2=CC=CC=C2	0.9	20.8136	312.1	7.59235	1.1359	2.7414
2854	O=C(C1=CC=C(OC2=CC(C3=CC(OC)=C(S(=O)(O)=O)C=C3)=C(O)C=C2)C=C1)C4=CC=CC=C4	O=C(CCCCCCCC=O)NC1=CC=C(C2(C3=CC=C(N)C=C3)C4=CC=CC=C4C5=C2C=CC=C5)C=C1	0.9	19.5601	304.795	7.13665	1.34793	2.7408
3372	OC1=CC=CC(OC2=CC=C(C=CC=C3)C3=C2)=C1C(C4=C(S(=O)(O)=O)C=CC=C4)=O	O=S(C1=CC=C(O)C=C1)(C2=CC=C(OC3=CC=CC=C3)C=C2)=O	0.9	20.6108	305.871	7.52149	1.09637	2.74025
3245	OC1=CC=CC(OC2=CC=C(C=CC=C3)C3=C2)=C1C(C4=C(S(=O)(O)=O)C=CC=C4)=O	O=C(C1=CC=C(OC2=CC=CC(OC3=CC=CC(OC4=CC=CC(OC5=CC=CC(OC6=CC=CC(OC7=CC=C(C(C8=CC=CC=C8)=O)C=C7)=C6)=C5C#N)=C4)=C3C#N)=C2)C=C1)C9=CC=CC=C9	0.9	17.8214	309.311	6.50682	1.37503	2.73888
2850	O=C(C1=CC=C(OC2=CC(C3=CC(OC)=C(S(=O)(O)=O)C=C3)=C(O)C=C2)C=C1)C4=CC=CC=C4	O=C(N(C1=O)C2=CC=C(C(C=C3C(F)(F)F)=CC=C3OC(C=C4)=CC=C4OC(C=C5)=C(C(F)(F)F)C=C5C6=CC=CC=C6)C=C2)C7=C8C1=CC=C(C(NC9=O)=O)C8=C9C=C7	0.9	17.6519	307.283	6.44705	1.58368	2.73799
802	O=C(C1=CC=C(OC2=CC=C(P(C3=CC=C(O)C=C3)(C4=CC=CC=C4)=O)C=C2)C(S(=O)(O)=O)=C1)C5=CC(S(=O)(O)=O)=CC=C5	O=P(C1=CC=C(OC2=CC=C(O)C=C2)C=C1)(C3=CC=CC=C3)C4=CC=CC=C4	0.7	17.8812	368.642	6.53197	1.05561	2.73748
3319	OC1=CC=CC(OC2=CC=C(C=CC=C3)C3=C2)=C1C(C4=C(S(=O)(O)=O)C=CC=C4)=O	O=C(C1=CC(C2=C(OC)C=CC=C2)=C(OC)C=C1)C(C=C3)=CC=C3OC4=CC=C(C(O)=O)C=C4	0.9	20.6772	306.034	7.55654	1.15544	2.73632
3243	OC1=CC=CC(OC2=CC=C(C=CC=C3)C3=C2)=C1C(C4=C(S(=O)(O)=O)C=CC=C4)=O	O=S(C1=CC=CC=C1)(C2=CC=C(OC3=CC=C(O)C(C4=CC(F)=C(F)C=C4)=C3)C=C2)=O	0.9	20.6657	307.674	7.5565	1.10558	2.73482
2906	O=C(C1=CC=C(OC2=CC(C3=CC(OC)=C(S(=O)(O)=O)C=C3)=C(O)C=C2)C=C1)C4=CC=CC=C4	O=P(C1=CC=C(SC2=CC=C(C(C(F)(F)F)(C(F)(F)F)C3=CC=C(S)C=C3)C=C2)C=C1)(C4=CC=CC=C4)C5=CC=CC=C5	0.9	18.3936	314.28	6.72963	1.42849	2.73323
3005	O=C(C1=CC=C(OC2=CC=C(S(=O)(O)=O)C=C2)C=C1)C3=CC=CC=C3	CC(C1=CC=C(OCC2=CN(C3=CC=C(OC4=C(C(F)(F)F)C=C(C5=CC=C(C6=CC=C(OC7=CC=CC=C7)C(C(F)(F)F)=C6)C=C5)C=C4)C=C3)N=N2)C=C1)(C)C(C=C8)=CC=C8OCC9=CNN=N9	0.9	18.7329	271.927	6.85504	1.58042	2.73271
1643	O=C(C1=CC=C(OC2=CC=C(S(=O)(O)=O)C=C2)C=C1)C3=CC=CC=C3	O=C(C1=CC=C(OC2=CC=C(C(C3=CC=CC=C3C(O)=O)C4=CC=C(O)C=C4)C=C2)C=C1)C5=CC=CC=C5	0.8	18.5977	311.57	6.81838	1.19463	2.72758
3336	OC1=CC=CC(OC2=CC=C(C=CC=C3)C3=C2)=C1C(C4=C(S(=O)(O)=O)C=CC=C4)=O	OC(C=C1)=CC=C1C(C(F)(F)F)(C(F)(F)F)C(C=C2)=CC=C2OC3=CC=C(C(C4=CC=CC=C4)=O)C=C3	0.9	20.5321	316.391	7.52804	1.12935	2.72741
10	O=S(C1=CC=CC=C1)(O)=O	O=S(C1=CC=C(O)C=C1)(C2=CC=C(OC3=CC=C(C(C4=CC=CC=C4)=O)C=C3)C=C2)=O	0.3	19.2648	314.839	7.06461	1.09681	2.72694
793	O=C(C1=CC=C(OC2=CC=C(P(C3=CC=C(O)C=C3)(C4=CC=CC=C4)=O)C=C2)C(S(=O)(O)=O)=C1)C5=CC(S(=O)(O)=O)=CC=C5	O=C(C1=CC=C(OC2=C(C=CC=C3C(N(C4=CC=CC=C4C)C5=O)=O)C3=C5C=C2)C=C1)C6=CC=CC=C6	0.7	17.5757	290.842	6.44778	1.17972	2.72586
790	O=C(C1=CC=C(OC2=CC=C(P(C3=CC=C(O)C=C3)(C4=CC=CC=C4)=O)C=C2)C(S(=O)(O)=O)=C1)C5=CC(S(=O)(O)=O)=CC=C5	O=P(C1=CC=C(O)C=C1)(C2=CC=CC=C2)C(C=C3)=CC=C3OC(C=C4)=CC=C4S(C5=CC=CC=C5)(=O)=O	0.7	17.781	368.674	6.52375	1.07004	2.72557
1653	O=C(C1=CC=C(OC2=CC=C(S(=O)(O)=O)C=C2)C=C1)C3=CC=CC=C3	O=C(N1)C2=C(C(C1=O)=CC=C3C4=O)C3=C(C(N4C5=CC=C(OC6=CC=C(C7=CC=C(OC8=C(C(F)(F)F)C=CC=C8)C=C7)C=C6)C(C(F)(F)F)=C5)=O)C=C2	0.8	18.1846	274.39	6.67394	1.24423	2.72472
3293	OC1=CC=CC(OC2=CC=C(C=CC=C3)C3=C2)=C1C(C4=C(S(=O)(O)=O)C=CC=C4)=O	O=S(C1=C(C2=NC3=C(C=C(N=CS4)C4=C3)S2)C=CC=C1)(C5=CC=CC=C5)=O	0.9	20.5198	307.451	7.54708	1.11073	2.71891
617	OC1=CC=C(S(C2=C(OC3=CC=C(C(C4=CC(S(=O)(O)=O)=CC=C4)=O)C=C3S(=O)(O)=O)C=C(OC5=CC=CC=C5)C=C2)(=O)=O)C=C1	O=C(C1=CC=C(OC2=CC=C(P(C3=CC=C(O)C=C3)(C4=CC=CC=C4)=O)C=C2)C=C1)C5=CC=CC=C5	0.6	18.0714	334.138	6.64682	1.10494	2.7188
1315	O=C(C1=CC=C(OC2=CC=C(P(C3=CC=C(O)C=C3)(C4=CC=CC=C4)=O)C=C2)C(S(=O)(O)=O)=C1)C5=CC(S(=O)(O)=O)=CC=C5	C=S(C(C=C1)=CC=C1OC2=CC3=CC=CC=C3C=C2)(C4=CC=C(OC5=CC=C(C=CC(O)=C6)C6=C5)C=C4)=C	0.8	19.2309	358.757	7.07355	1.11263	2.71871
3343	OC1=CC=CC(OC2=CC=C(C=CC=C3)C3=C2)=C1C(C4=C(S(=O)(O)=O)C=CC=C4)=O	O=S(C1=CC=CC=C1)(C2=CC=C(OC3=CC=C(O)C=C3)C=C2)=O	0.9	20.4836	306.392	7.53694	1.09279	2.71776
3344	OC1=CC=CC(OC2=CC=C(C=CC=C3)C3=C2)=C1C(C4=C(S(=O)(O)=O)C=CC=C4)=O	O=S(C1=CC=CC=C1)(C2=CC=C(OC3=CC=C(O)C(C4=CC=C(F)C=C4)=C3)C=C2)=O	0.9	20.4692	307.692	7.53311	1.11176	2.71722
294	OC1=C(S(=O)(O)=O)C=C(C=C(S(=O)(O)=O)C(OC2=CC=CC=C2C#N)=C3)C3=C1	O=C(C1=CC(C(C2=CC=CC=C2)=O)=CC=C1)C(C=C3)=CC=C3OC4=CC=C(O)C=C4	0.5	21.6102	302.13	7.95321	1.18112	2.71716
820	OC(C=C1)=CC=C1P(C(C=C2)=CC=C2OC(C(S(=O)(O)=O)=C3)=CC=C3C(C4=CC=CC(C(C5=CC=CC(S(=O)(O)=O)=C5)=O)=C4)=O)(C6=CC=CC=C6)=O	N=P(OC1=CC=C(F)C=C1)OC2=CC=C(OC)C=C2	0.7	17.6756	284.591	6.51318	1.17768	2.71383
2936	O=C(C1=CC=C(OC2=CC(C3=CC(OC)=C(S(=O)(O)=O)C=C3)=C(O)C=C2)C=C1)C4=CC=CC=C4	O=C(NC1=O)C2=C(C1=CC=C3C(N(C4=CC=C(OC5=C(C(F)(F)F)C=C(C6=CC=CC(C7=CC=C(OC8=CC=CC=C8)C(C(F)(F)F)=C7)=N6)C=C5)C=C4)C9=O)=O)C3=C9C=C2	0.9	18.0674	301.247	6.65781	1.5881	2.71372
315	O=S(C1=CC=C(O)C(S(=O)(O)=O)=C1)(C2=CC=C(OC3=CC=CC=C3)C(S(=O)(O)=O)=C2)=O	O=C(C1=CC=CC=C1)C2=CC=C(C(C3=CC=CC=C3)=O)C=C2	0.5	18.0769	279.904	6.66786	1.06673	2.71105
3373	OC1=CC=CC(OC2=CC=C(C=CC=C3)C3=C2)=C1C(C4=C(S(=O)(O)=O)C=CC=C4)=O	O=C(C1=CC(C(C2=CC=CC=C2)=O)=CC=C1)C(C=C3)=CC=C3OC4=CC=C(C5=CC=C(O)C=C5)C=C4	0.9	20.4165	312.137	7.53128	1.14715	2.7109
1608	O=C(C1=CC=C(OC2=CC=C(S(=O)(O)=O)C=C2)C=C1)C3=CC=CC=C3	O=S(C1=CC=C(O)C=C1)(C2=CC=C(OC3=CC=C(C(C(F)(F)F)(C(F)(F)F)C4=CC=CC=C4)C=C3)C=C2)=O	0.8	19.2027	313.422	7.08397	1.19592	2.71073
947	O=C(C1=CC=C(OC2=CC=C(S(=O)(O)=O)C=C2)C=C1)C3=CC=CC=C3	O=S(C1=CC=CC=C1)(C2=CC=C(OC3=CC=C(O)C(C(C)(C)C)=C3)C=C2)=O	0.7	18.7299	313.772	6.91428	1.20934	2.70887
1865	O=S(C1=CC=CC(C2=CC=CC(S(=O)(O)=O)=C2)=C1)(O)=O	SC1=CC=C(SC2=CC=C(SC3=CC=C(S(C4=CC=CC=C4)(=O)=O)C=C3)C=C2)C=C1	0.8	18.375	294.326	6.78604	1.10127	2.70776
3257	OC1=CC=CC(OC2=CC=C(C=CC=C3)C3=C2)=C1C(C4=C(S(=O)(O)=O)C=CC=C4)=O	FC(C(C1=CC=C(C2=NC3=C(C=C(N=CS4)C4=C3)S2)C=C1)(C(F)(F)F)C5=CC=CC=C5)(F)F	0.9	20.4052	310.52	7.53707	1.16862	2.70731
3361	OC1=CC=CC(OC2=CC=C(C=CC=C3)C3=C2)=C1C(C4=C(S(=O)(O)=O)C=CC=C4)=O	OC1=CC=C(S(C2=CC=C(OC3=CC=C(C4=CC=CC=C4)C=C3)C=C2)(=O)=O)C=C1	0.9	20.6937	304.832	7.64711	1.1004	2.70609
3251	OC1=CC=CC(OC2=CC=C(C=CC=C3)C3=C2)=C1C(C4=C(S(=O)(O)=O)C=CC=C4)=O	FC1=C(O)C(F)=C(F)C(C2=C(F)C(F)=C(OC3=CC=C(C4=CC=C(O)C=C4)C=C3)C(F)=C2F)=C1F	0.9	20.4949	305.501	7.57769	1.13863	2.70464
1419	O=C(C1=CC=C(OC2=CC=C(P(C3=CC=C(O)C=C3)(C4=CC=CC=C4)=O)C=C2)C(S(=O)(O)=O)=C1)C5=CC(S(=O)(O)=O)=CC=C5	O=C(C1=C2C(C=CC=C23)=CC=C1)N(C4=CC=CC(C(C5=CC=CC=C5)=O)=C4)C3=O	0.8	18.6752	320.623	6.90502	1.10883	2.70459
3282	OC1=CC=CC(OC2=CC=C(C=CC=C3)C3=C2)=C1C(C4=C(S(=O)(O)=O)C=CC=C4)=O	O=S(C1=CC=CC=C1)(C2=CC=C(OC3=CC=C(C=CC(O)=C4)C4=C3)C=C2)=O	0.9	20.5554	305.733	7.6003	1.07965	2.70456
3278	OC1=CC=CC(OC2=CC=C(C=CC=C3)C3=C2)=C1C(C4=C(S(=O)(O)=O)C=CC=C4)=O	O=S(C1=CC=C(O)C=C1)(C2=CC=C(OC3=CC=C(C(C4=CC=CC=C4)=O)C=C3)C=C2)=O	0.9	20.733	309.711	7.66768	1.09705	2.70395
1355	O=C(C1=CC=C(OC2=CC=C(P(C3=CC=C(O)C=C3)(C4=CC=CC=C4)=O)C=C2)C(S(=O)(O)=O)=C1)C5=CC(S(=O)(O)=O)=CC=C5	CC(C1=CC=CC=C1)(C(F)(F)F)C2=CC=C(C3=NC4=C(C=C(N=CS5)C5=C4)S3)C=C2	0.8	18.8558	322.908	6.97385	1.14197	2.70379
1635	O=C(C1=CC=C(OC2=CC=C(S(=O)(O)=O)C=C2)C=C1)C3=CC=CC=C3	O=C(N(C1=O)C2=CC=C(C(C=C3C(F)(F)F)=CC=C3OC(C=C4)=CC=C4OC(C=C5)=C(C(F)(F)F)C=C5C6=CC=CC=C6)C=C2)C7=C8C1=CC=C(C(NC9=O)=O)C8=C9C=C7	0.8	17.9877	272.871	6.6542	1.56182	2.70322
412	O=C(C1=CC=C(OC2=CC=C(P(C3=CC=C(O)C=C3)(C4=CC=CC=C4)=O)C=C2)C(S(=O)(O)=O)=C1)C5=CC(S(=O)(O)=O)=CC=C5	O=S(C1=CC=C(O)C=C1)(C2=CC=C(OC3=CC=C(C(C4=CC=CC=C4)=O)C=C3)C=C2)=O	0.6	18.0762	349.975	6.68728	1.08797	2.70307
1464	OC(C=C1)=CC=C1P(C(C=C2)=CC=C2OC(C(S(=O)(O)=O)=C3)=CC=C3C(C4=CC=CC(C(C5=CC=CC(S(=O)(O)=O)=C5)=O)=C4)=O)(C6=CC=CC=C6)=O	OC(C=C1)=CC=C1C(C=C2)=CC=C2OC3=C(C#N)C=CC=C3	0.8	17.9616	294.401	6.64647	1.20548	2.70243
792	O=C(C1=CC=C(OC2=CC=C(P(C3=CC=C(O)C=C3)(C4=CC=CC=C4)=O)C=C2)C(S(=O)(O)=O)=C1)C5=CC(S(=O)(O)=O)=CC=C5	O=S(C1=CC=C(O)C=C1)(C2=CC=C(OC3=CC=C(C(C4=CC=CC=C4)=O)C=C3)C=C2)=O	0.7	18.6241	349.669	6.89186	1.07055	2.70233
687	O=S(C1=CC=CC(S(=O)(O)=O)=C1)(C2=CC=C(OC3=CC=C(C4=CC=CC=C4)C=C3)C(S(=O)(O)=O)=C2)=O	O=C(C1=CC=CC=C1)C2=CC=C(C(C3=CC=CC=C3)=O)C=C2	0.7	17.9417	304.582	6.64879	0.937548	2.69848
3351	OC1=CC=CC(OC2=CC=C(C=CC=C3)C3=C2)=C1C(C4=C(S(=O)(O)=O)C=CC=C4)=O	O=S(C1=CC=C(OC2=CC=CC=C2C3=CC=C(F)C=C3)C=C1)(C4=CC=C(O)C=C4)=O	0.9	20.4535	307.55	7.58225	1.10582	2.69755
123	OC1=C(S(=O)(O)=O)C=C(C=C(S(=O)(O)=O)C(OC2=CC=CC=C2C#N)=C3)C3=C1	O=C(C1=CC=C(C2=CC=C(OC3=CC=CC=C3)C=C2)C=C1)C4=CC=CC=C4	0.4	19.2893	310.401	7.15226	1.08747	2.69695
1638	O=C(C1=CC=C(OC2=CC=C(S(=O)(O)=O)C=C2)C=C1)C3=CC=CC=C3	O=C(C1=CC=C(C(C2=CC=C(O)C=C2)=O)C=C1)C3=CC=C(OC4=CC=C(C=C4)C(C(F)(F)F)(C(F)(F)F)C5=CC=CC=C5)C=C3	0.8	17.7233	300.753	6.57405	1.17468	2.69595
234	O=S(C1=CC(C2=NC3=C(C=C(N=CS4)C4=C3)S2)=CC5=C(S(=O)(O)=O)C=CC=C51)(O)=O	O=C(C1=CC(C(C2=CC=CC=C2)=O)=CC=C1)C(C=C3)=CC=C3OC4=CC=C(C5=CC=C(O)C=C5)C=C4	0.5	17.7339	304.92	6.58175	1.2313	2.69441
2905	O=C(C1=CC=C(OC2=CC(C3=CC(OC)=C(S(=O)(O)=O)C=C3)=C(O)C=C2)C=C1)C4=CC=CC=C4	O=S(C1=C(C=CC(OCC2=NN(C3=CC(S(=O)(O)=O)=C(/C=C/C4=CC=CC=C4S(=O)(O)=O)C=C3)N=C2)=C1)OCC5=CNN=N5)(O)=O	0.9	18.7137	301.816	6.94607	1.41545	2.69415
255	SC(C=C1)=CC=C1SC(C=C2)=CC=C2SC(C(S(=O)(O)=O)=C3)=CC=C3S(C4=CC(S(=O)(O)=O)=CC=C4)(=O)=O	SC(C=C1)=CC=C1SC(C=C2)=CC=C2SC3=C(C#N)C=CC=C3	0.5	20.693	329.512	7.68135	1.18603	2.69393
709	O=S(C1=CC=CC=C1)(O)=O	O=C(C1=CC(C(C2=CC=CC=C2)=O)=CC=C1)C(C=C3)=CC=C3OC4=CC=C(C5=CC=C(O)C=C5)C=C4	0.7	17.8405	269.738	6.62686	1.37911	2.69214
2081	O=S(C1=C(OC2=CC=C(C3=NC4=C(C=C(N=CS5)C5=C4)S3)C=C2S(=O)(O)=O)C=CC=C1)(O)=O	CC(C1=CC=CC=C1)(C(F)(F)F)C2=CC=C(C3=NC4=C(C=C(N=CS5)C5=C4)S3)C=C2	0.9	17.5138	387.8	6.50786	1.36198	2.69118
311	O=S(C1=CC=C(O)C(S(=O)(O)=O)=C1)(C2=CC(S(=O)(O)=O)=C(OC3=CC=C(C=C(O)C=C4)C4=C3)C=C2)=O	OC(C=C1)=CC=C1P(C(C=C2)=CC=C2OC(C=C3)=CC=C3C(C4=CC=CC(C(C5=CC=CC=C5)=O)=C4)=O)(C6=CC=CC=C6)=O	0.5	18.0612	340.617	6.71544	1.16884	2.6895
629	O=S(C1=CC=C(O)C(S(=O)(O)=O)=C1)(C2=CC=C(OC3=CC=CC=C3)C(S(=O)(O)=O)=C2)=O	O=C(C1=CC=CC=C1)C2=CC=C(C(C3=CC=CC=C3)=O)C=C2	0.6	17.7074	300.036	6.58411	0.94599	2.68941
3284	OC1=CC=CC(OC2=CC=C(C=CC=C3)C3=C2)=C1C(C4=C(S(=O)(O)=O)C=CC=C4)=O	OC1=CC=C(OC2=CC=C(OC3=CC=C(S(C4=CC=CC=C4)(=O)=O)C=C3)C=C2)C=C1	0.9	20.4422	306.784	7.61538	1.11637	2.68433
638	OC1=CC(C=C(S(=O)(O)=O)C=C2)=C2C=C1OC3=CC=CC=C3C#N	O=C(C1=CC=C(C(C2=CC=C(OC3=CC=C(O)C(C(C)(C)C)=C3)C=C2)=O)C=C1)C4=CC=CC=C4	0.6	17.7973	311.082	6.63742	1.23475	2.68135
3342	OC1=CC=CC(OC2=CC=C(C=CC=C3)C3=C2)=C1C(C4=C(S(=O)(O)=O)C=CC=C4)=O	O=S(C1=CC=CC=C1)(C2=CC=C(OC3=CC=C(O)C(C4=CC=CC=C4)=C3)C=C2)=O	0.9	20.4478	308.636	7.62862	1.10374	2.68041
1351	O=C(C1=CC=C(OC2=CC=C(P(C3=CC=C(O)C=C3)(C4=CC=CC=C4)=O)C=C2)C(S(=O)(O)=O)=C1)C5=CC(S(=O)(O)=O)=CC=C5	O=C1N(C2=CC=CC=C2C(F)(F)F)C(C3=CC=CC4=C3C1=CC=C4)=O	0.8	18.7832	317.549	7.01003	1.17619	2.67948
931	O=C(C1=CC=C(OC2=CC=C(S(=O)(O)=O)C=C2)C=C1)C3=CC=CC=C3	FC1=C(O)C(F)=C(F)C(C2=C(F)C(F)=C(OC3=CC=C(C4=CC=C(O)C=C4)C=C3)C(F)=C2F)=C1F	0.7	17.8872	335.288	6.67612	1.23966	2.67928
578	O=S(C1=CC=CC(S(=O)(O)=O)=C1)(C2=CC=C(OC3=CC=C(O)C=C3)C(S(=O)(O)=O)=C2)=O	OC(C=C1)=CC=C1P(C(C=C2)=CC=C2OC(C=C3)=CC=C3C(C4=CC=CC(C(C5=CC=CC=C5)=O)=C4)=O)(C6=CC=CC=C6)=O	0.6	18.8474	331.369	7.0383	0.956841	2.67784
284	O=C(C1=CC=C(OCCCS(=O)(O)=O)C=C1)C2=CC=C(C(C3=CC=C(OCCCS(=O)(O)=O)C=C3)=O)C=C2	O=C(C1=CC=C(C2=CC=C(OC3=CC=CC=C3)C=C2)C=C1)C4=CC=CC=C4	0.5	18.1857	282.849	6.79136	1.20931	2.67776
818	O=C(C1=CC=C(OC2=CC=C(P(C3=CC=C(O)C=C3)(C4=CC=CC=C4)=O)C=C2)C(S(=O)(O)=O)=C1)C5=CC(S(=O)(O)=O)=CC=C5	O=C(C1=CC=C(C2=CC=C(OC3=CC=CC=C3)C=C2)C=C1)C4=CC=CC=C4	0.7	17.6205	340.361	6.58077	1.12362	2.67757
1382	O=C(C1=CC=C(OC2=CC=C(P(C3=CC=C(O)C=C3)(C4=CC=CC=C4)=O)C=C2)C(S(=O)(O)=O)=C1)C5=CC(S(=O)(O)=O)=CC=C5	O=C(N1)C2=C(C(C1=O)=CC=C3)C3=C(C4=C(C=CC=C5C6=O)C5=C(C(N6C7=CC(C(F)(F)F)=C(OC8=CC=C(OC9=CC=CC=C9C(F)(F)F)C=C8)C=C7)=O)C=C4)C=C2	0.8	18.1928	280.115	6.79502	1.52337	2.67737
121	OC1=C(S(=O)(O)=O)C=C(C=C(S(=O)(O)=O)C(OC2=CC=CC=C2C#N)=C3)C3=C1	O=C(C1=CC(C(C2=CC=CC=C2)=O)=CC=C1)C(C=C3)=CC=C3OC4=CC=C(C5=CC=C(O)C=C5)C=C4	0.4	18.2341	301.505	6.81803	1.28815	2.67439
105	O=S(C1=CC=CC(S(=O)(O)=O)=C1)(C2=CC=C(OC3=CC=C(O)C=C3)C(S(=O)(O)=O)=C2)=O	O=C(C1=CC(C(C2=CC=CC=C2)=O)=CC=C1)C(C=C3)=CC=C3OC4=CC=C(O)C=C4	0.4	20.0921	311.187	7.51397	1.0234	2.67396
1694	O=C(C1=CC=C(OC2=CC=C(S(=O)(O)=O)C=C2)C=C1)C3=CC=CC=C3	O=C(NC1=O)C2=C(C1=CC=C3C(N(C4=CC=C(OC5=C(C(F)(F)F)C=C(C6=CC=CC(C7=CC=C(OC8=CC=CC=C8)C(C(F)(F)F)=C7)=C6)C=C5)C=C4)C9=O)=O)C3=C9C=C2	0.8	17.882	272.23	6.68785	1.57537	2.6738
110	OC1=C(S(=O)(O)=O)C=C(C=C(S(=O)(O)=O)C(OC2=CC=CC=C2C#N)=C3)C3=C1	O=C(C1=CC=C(OC2=CC=C(P(C3=CC=C(O)C=C3)(C4=CC=CC=C4)=O)C=C2)C=C1)C5=CC=CC=C5	0.4	17.5485	329.024	6.56573	1.22811	2.67274
2971	O=C(C1=CC=C(OC2=CC=C(S(=O)(O)=O)C=C2)C=C1)C3=CC=CC=C3	CC(C1=CC=C(OC2=CC=C(C(C3=CC=C(OC4=CC=C(N5C(C6=CC=C7C8=C6C(C5=O)=CC=C8C9=C%10C7=CC=C(C(N(C%11=CC=C(OC%12=CC=CC=C%12)C=C%11)C%13=O)=O)C%10=C%13C=C9)=O)C=C4)C=C3)=O)C=C2)C=C1)=O	0.9	18.2707	269.77	6.83639	1.43121	2.67256
1147	OC1=CC2=C(C=C(S(=O)(O)=O)C=C2OC3=CC=CC=C3C#N)C=C1	OC1=CC=C(C(C2=CC=C(OC3=CC=C(C(C4=CC=CC=C4)=O)C=C3)C=C2)=O)C=C1	0.7	18.3132	297.802	6.85356	1.14389	2.67207
1448	O=C(C1=CC=C(OC2=CC=C(P(C3=CC=C(O)C=C3)(C4=CC=CC=C4)=O)C=C2)C(S(=O)(O)=O)=C1)C5=CC(S(=O)(O)=O)=CC=C5	O=C(C1=CC=C(C2=CC=C(OC3=CC=CC=C3)C=C2)C=C1)C4=CC=CC=C4	0.8	19.1346	350.868	7.16102	1.10214	2.67205
1645	O=C(C1=CC=C(OC2=CC=C(S(=O)(O)=O)C=C2)C=C1)C3=CC=CC=C3	O=P(C1=CC=C(OC2=CC=C(C(C(F)(F)F)(C(F)(F)F)C3=CC=C(O)C=C3)C=C2)C=C1)(C4=CC=CC=C4)C5=CC=CC=C5	0.8	17.8394	316.945	6.68286	1.17479	2.66942
992	O=C(NC1=O)C2=CC=C3C4=C2C1=CC=C4C(N(C5=CC=C(OC6=CC(C=C(OC7=CC=CC=C7)C(S(=O)(O)=O)=C8)=C8C=C6S(=O)(O)=O)C=C5)C3=O)=O	O=P(C1=CC=C(OC2=CC=C(C3=NNC(C4=C3C=CC=C4)=O)C=C2)C=C1)(C5=CC=CC=C5)C6=CC=CC=C6	0.7	17.6716	290.749	6.62762	1.14776	2.66635
2806	O=C(C1=CC=C(OC2=CC(C3=CC(OC)=C(S(=O)(O)=O)C=C3)=C(O)C=C2)C=C1)C4=CC=CC=C4	[H]/C([H])=C/C(C(F)=C1F)=C(C(F)=C1OC2=CC(C3=CC=C(C(OC4=C(C(F)=C(C(F)=C4F)/C=C([H])\[H])F)=C3)N5C(C6=CC=C(C7=C8C=CC(C5=O)=C67)C(NC8=O)=O)=O)=CC=C2)F	0.9	18.4872	306.342	6.93458	1.47349	2.66594
942	O=C(C1=CC=C(OC2=CC=C(S(=O)(O)=O)C=C2)C=C1)C3=CC=CC=C3	CC(C)(C1=CC=C(OC2=CC=C(S(C3=CC=CC=C3)(=O)=O)C=C2)C=C1)C4=CC=C(O)C=C4	0.7	18.9309	318.443	7.10416	1.21831	2.66476
270	O=S(C1=CC=CC(S(=O)(O)=O)=C1)(C2=CC=C(OC3=CC=C(O)C=C3)C(S(=O)(O)=O)=C2)=O	O=C(C1=CC(C(C2=CC=CC=C2)=O)=CC=C1)C(C=C3)=CC=C3OC4=CC=C(O)C=C4	0.5	20.1075	322.899	7.5477	0.972689	2.66406
3317	OC1=CC=CC(OC2=CC=C(C=CC=C3)C3=C2)=C1C(C4=C(S(=O)(O)=O)C=CC=C4)=O	SC1=CC=C(SC2=CC=C(SC3=CC=C(S(C4=CC=CC=C4)(=O)=O)C=C3)C=C2)C=C1	0.9	20.0567	327.108	7.52878	1.11464	2.66401
1381	O=C(C1=CC=C(OC2=CC=C(P(C3=CC=C(O)C=C3)(C4=CC=CC=C4)=O)C=C2)C(S(=O)(O)=O)=C1)C5=CC(S(=O)(O)=O)=CC=C5	O=C(N1)C2=C(C(C1=O)=CC=C3C4=O)C3=C(C(N4C5=CC=C(OC6=CC=C(C7=CC=C(OC8=CC=CC=C8)C=C7)C=C6)C=C5)=O)C=C2	0.8	18.9925	331.488	7.13279	1.17148	2.6627
1255	O=C(C1=CC=C(OC2=CC=CC=C2)C=C1)C3=CC(C4=C(C=CC=C4)OCCCS(=O)(O)=O)=C(C=C3)OCCCS(=O)(O)=O	SC(C=C1)=CC=C1SC(C=C2)=CC=C2SC3=C(C#N)C=CC=C3	0.8	17.9354	285.965	6.736	1.26001	2.66263
2846	O=C(C1=CC=C(OC2=CC(C3=CC(OC)=C(S(=O)(O)=O)C=C3)=C(O)C=C2)C=C1)C4=CC=CC=C4	O=C1N(C2=CC=CC=C2C(F)(F)F)C(C3=CC=C4C5=C3C1=CC=C5C(N(C6=C(C(F)(F)F)C=CC=C6)C4=O)=O)=O	0.9	18.9005	303.004	7.10399	1.39509	2.66055
1737	OC1=CC=CC(OC2=CC=C(C=CC=C3)C3=C2)=C1C(C4=C(S(=O)(O)=O)C=CC=C4)=O	FC1=C(O)C(F)=C(F)C(C2=C(F)C(F)=C(OC3=CC=C(C4=CC=C(O)C=C4)C=C3)C(F)=C2F)=C1F	0.8	19.4251	303.384	7.30486	1.19351	2.6592
519	O=C(C1=CC=C(OC2=CC=C(S(=O)(O)=O)C=C2)C=C1)C3=CC=CC=C3	OC1=CC=C(C(C(C=C2)=CC=C2OC(C=C3)=CC=C3C(CCC(O)=O)(C)C4=CC=CC=C4)=O)C=C1	0.6	18.6725	319.846	7.02589	1.26505	2.65767
1825	OC1=CC=CC(OC2=CC=C(C=CC=C3)C3=C2)=C1C(C4=C(S(=O)(O)=O)C=CC=C4)=O	OC1=CC=C(C(C2=C(C(O)=O)C=CC=C2)C3=CC=C(OC4=CC=CC=C4C#N)C=C3)C=C1	0.8	20.0285	308.324	7.53654	1.18487	2.65752
1947	OC1=CC2=C(C=C(S(=O)(O)=O)C=C2OC3=CC=CC=C3C#N)C=C1	O=C(C1=C2C(C=CC=C23)=CC=C1)N(C4=CC=CC(C(C5=CC=CC=C5)=O)=C4)C3=O	0.8	17.8653	284.005	6.72258	1.26246	2.6575
1461	OC(C=C1)=CC=C1P(C(C=C2)=CC=C2OC(C(S(=O)(O)=O)=C3)=CC=C3C(C4=CC=CC(C(C5=CC=CC(S(=O)(O)=O)=C5)=O)=C4)=O)(C6=CC=CC=C6)=O	O=P(C1=CC=C(OC2=CC=C(O)C=C2)C=C1)(C3=CC=CC=C3)C4=CC=CC=C4	0.8	17.9569	306.343	6.76262	1.10876	2.65532
3252	OC1=CC=CC(OC2=CC=C(C=CC=C3)C3=C2)=C1C(C4=C(S(=O)(O)=O)C=CC=C4)=O	O=C(C1=CC=C(F)C=C1)C(C=C2)=CC=C2OC(C=C3)=CC=C3C(C(F)(F)F)(C(F)(F)F)C4=CC=CC=C4	0.9	20.4228	313.463	7.69169	1.16315	2.65517
3249	OC1=CC=CC(OC2=CC=C(C=CC=C3)C3=C2)=C1C(C4=C(S(=O)(O)=O)C=CC=C4)=O	O=C(C1=CC=C(C=C1)F)C2=CC=C(C=C2)OC3=CC=C(C=C3)C(C)(C4=CC=C(C=C4)O)C	0.9	20.7626	313.923	7.82139	1.13367	2.6546
1320	O=C(C1=CC=C(OC2=CC=C(P(C3=CC=C(O)C=C3)(C4=CC=CC=C4)=O)C=C2)C(S(=O)(O)=O)=C1)C5=CC(S(=O)(O)=O)=CC=C5	O=S(C1=CC=CC=C1)(C2=CC=C(OC3=CC=C(C(C4=CC=C(OC5=CC=C(S(C6=CC=CC=C6)(=O)=O)C=C5)C=C4)=O)C=C3)C=C2)=O	0.8	17.532	341.58	6.60618	1.02267	2.65388
606	OC1=C(S(=O)(O)=O)C=C(C=C(S(=O)(O)=O)C(OC2=CC=CC=C2C#N)=C3)C3=C1	O=C(C1=CC(C(C2=CC=CC=C2)=O)=CC=C1)C(C=C3)=CC=C3OC4=CC=C(O)C=C4	0.6	20.5828	296.122	7.75647	1.16368	2.65362
3376	OC1=CC=CC(OC2=CC=C(C=CC=C3)C3=C2)=C1C(C4=C(S(=O)(O)=O)C=CC=C4)=O	OC1=CC=C(C2=CC=C(C3=CC=CC=C3C#N)C=C2)C=C1	0.9	20.6377	307.472	7.78256	1.10609	2.65179
1121	OC1=CC=C(S(C2=C(OC3=CC=C(C(C4=CC(S(=O)(O)=O)=CC=C4)=O)C=C3S(=O)(O)=O)C=C(OC5=CC=CC=C5)C=C2)(=O)=O)C=C1	OC(C=C1)=CC=C1P(C(C=C2)=CC=C2OC(C=C3)=CC=C3C(C4=CC=CC(C(C5=CC=CC=C5)=O)=C4)=O)(C6=CC=CC=C6)=O	0.7	18.6843	319.92	7.04817	1.11248	2.65094
1780	OC1=CC=CC(OC2=CC=C(C=CC=C3)C3=C2)=C1C(C4=C(S(=O)(O)=O)C=CC=C4)=O	OC(C=C1)=CC=C1C(C(F)(F)F)(C(F)(F)F)C(C=C2)=CC=C2OC3=CC=C(C(C4=CC=CC=C4)=O)C=C3	0.8	19.6724	319.633	7.42172	1.1928	2.65065
1759	OC1=CC=CC(OC2=CC=C(C=CC=C3)C3=C2)=C1C(C4=C(S(=O)(O)=O)C=CC=C4)=O	O=C(C1=CC=C(C(C2=CC=C(OC3=CC=C(O)C(C(C)(C)C)=C3)C=C2)=O)C=C1)C4=CC=CC=C4	0.8	19.5789	317.286	7.39079	1.18517	2.64909
1775	OC1=CC=CC(OC2=CC=C(C=CC=C3)C3=C2)=C1C(C4=C(S(=O)(O)=O)C=CC=C4)=O	O=C(C1=CC=C(CCC)C=C1)C2=CC=CC=C2	0.8	20.4025	314.036	7.70705	1.07961	2.64726
1714	O=C(NC1=O)C2=CC=C3C4=C2C1=CC=C4C(N(C5=CC=C(OC6=CC(C=C(OC7=CC=CC=C7)C(S(=O)(O)=O)=C8)=C8C=C6S(=O)(O)=O)C=C5)C3=O)=O	O=C(NC1=O)C2=C(C1=CC=C3)C3=C(C4=C(C=CC=C5C(N(C6=CC=C(OC7=CC=CC=C7)C=C6)C8=O)=O)C5=C8C=C4)C=C2	0.8	19.5949	275.892	7.4081	1.15507	2.64506
1372	O=C(C1=CC=C(OC2=CC=C(P(C3=CC=C(O)C=C3)(C4=CC=CC=C4)=O)C=C2)C(S(=O)(O)=O)=C1)C5=CC(S(=O)(O)=O)=CC=C5	OC(C=C1)=CC=C1C2=CC=C(OC3=CC(N=C4C5=CC=CC=C5)=C(C=C3)N=C4C(C=C6)=CC=C6C7=NC8=C(N=C7C9=CC=CC=C9)C=CC=C8)C=C2	0.8	17.6421	333.98	6.67132	1.23681	2.64447
1362	O=C(C1=CC=C(OC2=CC=C(P(C3=CC=C(O)C=C3)(C4=CC=CC=C4)=O)C=C2)C(S(=O)(O)=O)=C1)C5=CC(S(=O)(O)=O)=CC=C5	O=C(C1=CC=C(SC2=CC=C(C(N3C4=CC=C(OC5=CC=CC=C5)C=C4)=O)C6=C2C=CC=C6C3=O)C=C1)C7=CC=C(SC8=CC=C(C(N9)=O)C%10=C8C=CC=C%10C9=O)C=C7	0.8	17.8945	309.052	6.76715	1.46683	2.64432
3335	OC1=CC=CC(OC2=CC=C(C=CC=C3)C3=C2)=C1C(C4=C(S(=O)(O)=O)C=CC=C4)=O	O=C(NC1=O)C2=CC=C3C4=C2C1=CC=C4C(N(C5=NC=NN5)C3=O)=O	0.9	20.9087	295.096	7.90887	1.09574	2.6437
1404	O=C(C1=CC=C(OC2=CC=C(P(C3=CC=C(O)C=C3)(C4=CC=CC=C4)=O)C=C2)C(S(=O)(O)=O)=C1)C5=CC(S(=O)(O)=O)=CC=C5	O=C(C1=CC=CC=C1)C2=CC=C(C(C3=CC=CC=C3)=O)C=C2	0.8	19.3119	344.609	7.30503	1.08233	2.64365
1758	OC1=CC=CC(OC2=CC=C(C=CC=C3)C3=C2)=C1C(C4=C(S(=O)(O)=O)C=CC=C4)=O	O=C(C1=CC=C(OC2=C(C=CC=C3C(N(C4=CC=CC=C4C)C5=O)=O)C3=C5C=C2)C=C1)C6=CC=CC=C6	0.8	18.0552	302.04	6.83592	1.21657	2.64123
3272	OC1=CC=CC(OC2=CC=C(C=CC=C3)C3=C2)=C1C(C4=C(S(=O)(O)=O)C=CC=C4)=O	O=P(C1=CC=C(O)C=C1)(C2=CC=CC=C2)C(C=C3)=CC=C3OC(C=C4)=CC=C4S(C5=CC=CC=C5)(=O)=O	0.9	20.1214	312.482	7.62374	1.16067	2.63931
689	O=S(C1=CC=CC(S(=O)(O)=O)=C1)(C2=CC=C(OC3=CC=C(C4=CC=CC=C4)C=C3)C(S(=O)(O)=O)=C2)=O	O=C(C1=CC=CC(C(C2=CC=C(OC3=CC=C(C(C)(C)C4=CC=C(O)C=C4)C=C3)C=C2)=O)=C1)C5=CC=CC=C5	0.7	17.532	327.715	6.65983	1.03429	2.6325
3316	OC1=CC=CC(OC2=CC=C(C=CC=C3)C3=C2)=C1C(C4=C(S(=O)(O)=O)C=CC=C4)=O	OC(C=C1)=CC=C1C(C)(C)C(C=C2)=CC=C2OC3=CC=C(C(C4=CC=CC=C4)=O)C=C3	0.9	20.8052	316.734	7.91645	1.12667	2.62809
507	O=C(C1=CC=C(OC2=CC=C(S(=O)(O)=O)C=C2)C=C1)C3=CC=CC=C3	OC(C=C1)=CC=C1C(C)(C)C(C=C2)=CC=C2OC3=CC=C(C(C4=CC=CC=C4)=O)C=C3	0.6	18.1915	324.145	6.92293	1.24302	2.62772
55	O=S(C1=CC=CC=C1)(O)=O	O=S(C1=CC=C(O)C=C1)(C2=CC=C(OC3=CC=C(C(C4=CC=CC=C4)=O)C=C3)C=C2)=O	0.4	18.9079	314.379	7.19674	1.10922	2.62728
738	O=C(C1=CC=C(OC2=CC=CC=C2)C=C1)C3=CC(C4=C(C=CC=C4)OCCCS(=O)(O)=O)=C(C=C3)OCCCS(=O)(O)=O	O=P(C1=CC=C(OC2=CC=C(O)C=C2)C=C1)(C3=CC=CC=C3)C4=CC=CC=C4	0.7	18.8311	285.758	7.17222	1.24901	2.62557
505	O=C(C1=CC=C(OC2=CC=C(S(=O)(O)=O)C=C2)C=C1)C3=CC=CC=C3	O=C(C1=CC=C(C(C2=CC=C(OC3=CC=C(O)C(C(C)(C)C)=C3)C=C2)=O)C=C1)C4=CC=CC=C4	0.6	17.8038	313.947	6.78605	1.1897	2.62359
262	O=S(C1=CC=CC(S(=O)(O)=O)=C1)(C2=CC=C(OC3=CC=C(O)C(C4=CC=CC=C4)=C3)C(S(=O)(O)=O)=C2)=O	O=C(C1=CC(C(C2=CC=CC=C2)=O)=CC=C1)C(C=C3)=CC=C3OC4=CC=C(C5=CC=C(O)C=C5)C=C4	0.5	17.9047	329.651	6.82516	1.13857	2.62334
1371	O=C(C1=CC=C(OC2=CC=C(P(C3=CC=C(O)C=C3)(C4=CC=CC=C4)=O)C=C2)C(S(=O)(O)=O)=C1)C5=CC(S(=O)(O)=O)=CC=C5	O=S(C1=CC=CC=C1)(C2=CC=C(OC3=CC=C(S(=O)(C4=CC=CC=C4)=O)C=C3)C=C2)=O	0.8	18.3594	350.918	7.00315	0.97674	2.6216
3398	OC1=CC=CC(OC2=CC=C(C=CC=C3)C3=C2)=C1C(C4=C(S(=O)(O)=O)C=CC=C4)=O	OC1=CC=C(C(C2=C(C(O)=O)C=CC=C2)C3=CC=C(OC4=CC=CC=C4C#N)C=C3)C=C1	0.9	20.3446	310.513	7.76101	1.11208	2.62138
1347	O=C(C1=CC=C(OC2=CC=C(P(C3=CC=C(O)C=C3)(C4=CC=CC=C4)=O)C=C2)C(S(=O)(O)=O)=C1)C5=CC(S(=O)(O)=O)=CC=C5	O=C(C1=CC=C(OC2=C(C=CC=C3C(N(C4=CC=CC=C4C)C5=O)=O)C3=C5C=C2)C=C1)C6=CC=CC=C6	0.8	18.6595	328.104	7.11898	1.13201	2.62109
819	OC(C=C1)=CC=C1P(C(C=C2)=CC=C2OC(C(S(=O)(O)=O)=C3)=CC=C3C(C4=CC=CC(C(C5=CC=CC(S(=O)(O)=O)=C5)=O)=C4)=O)(C6=CC=CC=C6)=O	O=S(C1=CC=CC=C1)(C2=CC=C(OC3=CC=C(O)C=C3)C=C2)=O	0.7	17.6158	289.841	6.72386	1.09387	2.61989
3271	OC1=CC=CC(OC2=CC=C(C=CC=C3)C3=C2)=C1C(C4=C(S(=O)(O)=O)C=CC=C4)=O	OC(C=C1)=CC=C1P(C(C=C2)=CC=C2OC(C=C3)=CC=C3C(C4=CC=CC(C(C5=CC=CC=C5)=O)=C4)=O)(C6=CC=CC=C6)=O	0.9	17.8072	317.958	6.79712	1.16327	2.61982
1460	OC(C=C1)=CC=C1P(C(C=C2)=CC=C2OC(C(S(=O)(O)=O)=C3)=CC=C3C(C4=CC=CC(C(C5=CC=CC(S(=O)(O)=O)=C5)=O)=C4)=O)(C6=CC=CC=C6)=O	O=C(C1=CC(C2=C(OC)C=CC=C2)=C(OC)C=C1)C(C=C3)=CC=C3OC4=CC=C(C(O)=O)C=C4	0.8	18.2621	291.703	6.9722	1.25569	2.61927
932	O=C(C1=CC=C(OC2=CC=C(S(=O)(O)=O)C=C2)C=C1)C3=CC=CC=C3	O=C(C1=CC=C(F)C=C1)C(C=C2)=CC=C2OC(C=C3)=CC=C3C(C(F)(F)F)(C(F)(F)F)C4=CC=CC=C4	0.7	18.9309	283.855	7.23254	1.25663	2.61747
2947	O=C(C1=CC=C(OC2=CC(C3=CC(OC)=C(S(=O)(O)=O)C=C3)=C(O)C=C2)C=C1)C4=CC=CC=C4	O=C(N(C1=CC(C(C(F)(F)F)(C(F)(F)F)C2=CC=C(OC3=C(F)C(F)=C(C=C)C(F)=C3F)C=C2)=CC=C1OC4=C(F)C(F)=C(C=C)C(F)=C4F)C5=O)C6=CC=C7C8=C6C5=CC=C8C(NC7=O)=O	0.9	18.0486	305.647	6.89644	1.55597	2.61709
835	O=S(C1=CC(C2=NC3=C(C=C(N=CS4)C4=C3)S2)=CC5=C(S(=O)(O)=O)C=CC=C51)(O)=O	O=C(C1=CC=CC=C1)C2=CC=C(C(C3=CC=CC=C3)=O)C=C2	0.7	18.3266	309.813	7.00834	1.34234	2.61497
273	O=S(C1=CC=CC(S(=O)(O)=O)=C1)(C2=CC=C(OC3=CC=C(C4=CC=C(O)C=C4)C=C3)C(S(=O)(O)=O)=C2)=O	O=C(C1=CC(C(C2=CC=CC=C2)=O)=CC=C1)C(C=C3)=CC=C3OC4=CC=C(C5=CC=C(O)C=C5)C=C4	0.5	17.8888	335.194	6.84127	1.11888	2.61484
998	O=C(NC1=O)C2=CC=C3C4=C2C1=CC=C4C(N(C5=CC=C(OC6=CC(C=C(OC7=CC=CC=C7)C(S(=O)(O)=O)=C8)=C8C=C6S(=O)(O)=O)C=C5)C3=O)=O	O=P(C1=CC=C(OC2=CC=C(O)C=C2)C=C1)(C3=CC=CC=C3)C4=CC=CC=C4	0.7	17.6621	297.858	6.75511	1.15505	2.61463
1736	OC1=CC=CC(OC2=CC=C(C=CC=C3)C3=C2)=C1C(C4=C(S(=O)(O)=O)C=CC=C4)=O	O=C(C1=CC=C(C=C1)F)C2=CC=C(C=C2)OC3=CC=C(C=C3)C(C)(C4=CC=C(C=C4)O)C	0.8	20.0825	318.084	7.68516	1.16316	2.61315
394	O=C(C1=CC=C(OC2=CC=CC=C2)C=C1)C3=CC(C4=C(C=CC=C4)OCCCS(=O)(O)=O)=C(C=C3)OCCCS(=O)(O)=O	OC(C=C1)=CC=C1C(C=C2)=CC=C2OC3=C(C#N)C=CC=C3	0.6	18.3823	283.843	7.03608	1.41372	2.61258
821	O=S(C1=CC=CC(S(=O)(O)=O)=C1)(C2=CC=C(OC3=CC=C(C=CC(O)=C4)C4=C3)C(S(=O)(O)=O)=C2)=O	O=C(C1=CC=C(OC2=CC=CC(OC3=CC=CC(OC4=CC=CC(OC5=CC=CC(OC6=CC=CC(OC7=CC=C(C(C8=CC=CC=C8)=O)C=C7)=C6)=C5C#N)=C4)=C3C#N)=C2)C=C1)C9=CC=CC=C9	0.7	17.5587	312.153	6.72454	1.18368	2.61114
2884	O=C(C1=CC=C(OC2=CC(C3=CC(OC)=C(S(=O)(O)=O)C=C3)=C(O)C=C2)C=C1)C4=CC=CC=C4	O=C(NC1=O)C2=CC=C3C4=C2C1=CC=C4C(N(C5=CC(C6=NC(C7=CC=CC=C7)=NN6)=CC=C5)C3=O)=O	0.9	18.7406	291.813	7.18016	1.41409	2.61006
3283	OC1=CC=CC(OC2=CC=C(C=CC=C3)C3=C2)=C1C(C4=C(S(=O)(O)=O)C=CC=C4)=O	O=C(NC1=O)C2=C(C1=CC=C3)C3=C(C4=C(C=CC=C5C(N(C6=CC=C(N(C7=CC=CC=C7)C8=CC=CC=C8)C=C6)C9=O)=O)C5=C9C=C4)C=C2	0.9	17.8277	302.765	6.83486	1.16567	2.60835
1695	O=C(C1=CC=C(OC2=CC=C(S(=O)(O)=O)C=C2)C=C1)C3=CC=CC=C3	O=C(NC1=O)C2=C(C1=CC=C3C(N(C4=CC=C(OC5=C(C(F)(F)F)C=C(C6=CC=C(C7=CC=C(OC8=CC=CC=C8)C(C(F)(F)F)=C7)S6)C=C5)C=C4)C9=O)=O)C3=C9C=C2	0.8	17.7403	271.416	6.80779	1.57988	2.60588
3349	OC1=CC=CC(OC2=CC=C(C=CC=C3)C3=C2)=C1C(C4=C(S(=O)(O)=O)C=CC=C4)=O	OC(C=C1)=CC=C1C2(C3=CC=C(OC4=CC=CC=C4C#N)C=C3)C5=C(C=CC=C5)C6=CC=CC=C26	0.9	20.284	307.666	7.78395	1.1616	2.60588
3730	OC1=CC(C=C(S(=O)(O)=O)C=C2)=C2C=C1OC3=CC=CC=C3C#N	O=C(C1=CC=CC2=C1C3=CC=C2)N(NCCCCCCNN(C4=O)C(C5=C(C4=CC=C6)C6=CC=C5)=O)C3=O	0.9	17.5629	292.564	6.74075	1.29918	2.60548
171	O=S(C1=CC=CC(S(=O)(O)=O)=C1)(C2=CC=C(OC3=CC=C(C4=CC=CC=C4)C=C3)C(S(=O)(O)=O)=C2)=O	O=C(C1=CC=C(C(C2=CC=C(OC3=CC=C(O)C(C(C)(C)C)=C3)C=C2)=O)C=C1)C4=CC=CC=C4	0.5	18.0688	314.693	6.93493	1.15522	2.60547
1450	O=C(C1=CC=C(OC2=CC=C(P(C3=CC=C(O)C=C3)(C4=CC=CC=C4)=O)C=C2)C(S(=O)(O)=O)=C1)C5=CC(S(=O)(O)=O)=CC=C5	O=C(NC1=O)C2=C(C1=CC=C3C(N(C4=CC=C(OC5=CC=C(P(C6=CC=C(OC7=CC=CC=C7)C=C6)(C8=CC=CC=C8)=O)C=C5)C=C4)C9=O)=O)C3=C9C=C2	0.8	19.3515	329.112	7.43136	1.31514	2.60404
1615	O=C(C1=CC=C(OC2=CC=C(S(=O)(O)=O)C=C2)C=C1)C3=CC=CC=C3	CC(CCC(N1C=CN=N1)=O)(C2=CC=C(O)C=C2)C(C=C3)=CC=C3OC(C=C4)=CC=C4C(C5=CC=CC=C5)=O	0.8	18.421	277.123	7.07717	1.21564	2.60288
3410	O=S(C1=CC=CC(C2=CC=CC(S(=O)(O)=O)=C2)=C1)(O)=O	SC1=CC=C(SC2=CC=C(SC3=CC=C(S(C4=CC=CC=C4)(=O)=O)C=C3)C=C2)C=C1	0.9	18.6536	274.125	7.16767	1.11421	2.60247
813	O=C(C1=CC=C(OC2=CC=C(P(C3=CC=C(O)C=C3)(C4=CC=CC=C4)=O)C=C2)C(S(=O)(O)=O)=C1)C5=CC(S(=O)(O)=O)=CC=C5	O=C(C1=CC(C(C2=CC=CC=C2)=O)=CC=C1)C(C=C3)=CC=C3OC4=CC=C(O)C=C4	0.7	17.8588	347.096	6.86251	1.07264	2.60237
602	OC1=C(S(=O)(O)=O)C=C(C=C(S(=O)(O)=O)C(OC2=CC=CC=C2C#N)=C3)C3=C1	O=C(C1=CC=CC=C1)C2=CC=C(C(C3=CC=CC=C3)=O)C=C2	0.6	21.1024	283.027	8.10972	1.04106	2.60212
3389	OC1=CC=CC(OC2=CC=C(C=CC=C3)C3=C2)=C1C(C4=C(S(=O)(O)=O)C=CC=C4)=O	O=CC1=CC=CC(C(NC2=CC=CC(C(C(F)(F)F)(C(F)(F)F)C3=CC=C(N)C=C3)=C2)=O)=C1	0.9	20.5946	308.413	7.91598	1.12792	2.60165
1711	O=C(NC1=O)C2=CC=C3C4=C2C1=CC=C4C(N(C5=CC=C(OC6=CC(C=C(OC7=CC=CC=C7)C(S(=O)(O)=O)=C8)=C8C=C6S(=O)(O)=O)C=C5)C3=O)=O	O=C(C1=CC=CC2=C1C3=CC=C2)N(NC4=CC=C(OC5=CC=C(NN(C6=O)C(C7=C(C6=CC=C8)C8=CC=C7)=O)C=C5)C=C4)C3=O	0.8	18.9056	266.98	7.2687	1.17407	2.60096
3300	OC1=CC=CC(OC2=CC=C(C=CC=C3)C3=C2)=C1C(C4=C(S(=O)(O)=O)C=CC=C4)=O	O=C(C1=CC=CC2=C1C3=CC=C2)N(NC4=CC=C(OC5=CC=C(NN(C6=O)C(C7=C(C6=CC=C8)C8=CC=C7)=O)C=C5)C=C4)C3=O	0.9	17.8363	301.945	6.85773	1.15691	2.6009
1684	O=C(C1=CC=C(OC2=CC=C(S(=O)(O)=O)C=C2)C=C1)C3=CC=CC=C3	O=C(C1=CC=CC(C(C2=CC=C(OC3=CC=C(C(C)(C)C4=CC=C(O)C=C4)C=C3)C=C2)=O)=C1)C5=CC=CC=C5	0.8	18.608	305.222	7.15473	1.23574	2.60079
3301	OC1=CC=CC(OC2=CC=C(C=CC=C3)C3=C2)=C1C(C4=C(S(=O)(O)=O)C=CC=C4)=O	O=C(C1=CC=CC2=C1C3=CC=C2)N(NC4=CC=C(CC5=CC=C(NN(C6=O)C(C7=C(C6=CC=C8)C8=CC=C7)=O)C=C5)C=C4)C3=O	0.9	18.1832	298.915	6.99597	1.14842	2.5991
449	O=C(C1=CC(S(=O)(O)=O)=CC=C1)C2=CC=CC=C2	OC1=CC=C(S(=O)(C2=CC=C(OC3=CC=C(S(C4=CC=CC=C4)(=O)=O)C=C3)C=C2)=O)C=C1	0.6	18.561	284.156	7.14142	1.11591	2.59906
336	O=S(C1=CC=CC(S(=O)(O)=O)=C1)(C2=CC(S(=O)(O)=O)=C(SC3=CC(C=CC(S)=C4)=C4C=C3)C=C2)=O	O=C(C1=CC(C(C2=CC=CC=C2)=O)=CC=C1)C(C=C3)=CC=C3OC4=CC=C(O)C=C4	0.5	18.1908	335.412	7	1.10137	2.59869
668	O=S(C1=CC=CC(S(=O)(O)=O)=C1)(C2=CC(S(=O)(O)=O)=C(SC3=CC(C=CC(S)=C4)=C4C=C3)C=C2)=O	SC1=CC=C(SC2=CC=C(SC3=CC=C(S(C4=CC=CC=C4)(=O)=O)C=C3)C=C2)C=C1	0.6	17.8497	350.466	6.8752	1.11166	2.59625
1654	O=C(C1=CC=C(OC2=CC=C(S(=O)(O)=O)C=C2)C=C1)C3=CC=CC=C3	O=C(N1)C2=C(C(C1=O)=CC=C3C4=O)C3=C(C(N4C5=CC(C(F)(F)F)=C(OC6=CC=C(OC7=CC=CC=C7C(F)(F)F)C=C6)C=C5)=O)C=C2	0.8	17.6801	272.686	6.80991	1.21763	2.59623
3328	OC1=CC=CC(OC2=CC=C(C=CC=C3)C3=C2)=C1C(C4=C(S(=O)(O)=O)C=CC=C4)=O	O=C(C1=CC=C(CCCCCCCCCCCC)C=C1)C2=CC=CC=C2	0.9	20.3156	315.422	7.82526	1.16228	2.59616
791	O=C(C1=CC=C(OC2=CC=C(P(C3=CC=C(O)C=C3)(C4=CC=CC=C4)=O)C=C2)C(S(=O)(O)=O)=C1)C5=CC(S(=O)(O)=O)=CC=C5	OC1=C(OC2=CC=C(C(C3=CC(C(C4=CC=CC=C4)=O)=CC=C3)=O)C=C2)C=C5C(C6C=CC5C6)=C1	0.7	17.7801	339.154	6.85041	1.12966	2.59548
1339	O=C(C1=CC=C(OC2=CC=C(P(C3=CC=C(O)C=C3)(C4=CC=CC=C4)=O)C=C2)C(S(=O)(O)=O)=C1)C5=CC(S(=O)(O)=O)=CC=C5	O=C(C1=C(C2=CC=C3C4=NC5=C(N46)C=C(OC7=CC=C(C8=CC=C(O)C=C8)C=C7)C=C5)C3=C(C6=O)C=C1)N9C2=NC%10=C9C=CC=C%10	0.8	18.4249	328.092	7.1041	1.17232	2.59355
3288	OC1=CC=CC(OC2=CC=C(C=CC=C3)C3=C2)=C1C(C4=C(S(=O)(O)=O)C=CC=C4)=O	O=C(C1=CC=C(C(C2=CC=C(OC3=CC=C(O)C(C(C)(C)C)=C3)C=C2)=O)C=C1)C4=CC=CC=C4	0.9	20.4852	317.302	7.89925	1.12427	2.59331
2663	OC(C=C1)=CC=C1P(C(C=C2)=CC=C2OC(C(S(=O)(O)=O)=C3)=CC=C3C(C4=CC=CC(C(C5=CC=CC(S(=O)(O)=O)=C5)=O)=C4)=O)(C6=CC=CC=C6)=O	O=P(C1=CC=C(SC2=CC=C(SC3=CC=C(S)C=C3)C=C2)C=C1)(C4=CC=CC=C4)C5=CC=CC=C5	0.9	18.1213	302.721	6.99899	1.14843	2.58912
3330	OC1=CC=CC(OC2=CC=C(C=CC=C3)C3=C2)=C1C(C4=C(S(=O)(O)=O)C=CC=C4)=O	O=C(NC1=O)C2=CC=C3C4=C2C1=CC=C4C(N(C5=CC=C(OC6=CC=CC=C6)C=C5)C3=O)=O	0.9	20.2976	305.086	7.84297	1.08808	2.588
1149	OC1=CC(C=C(S(=O)(O)=O)C=C2)=C2C=C1OC3=CC=CC=C3C#N	O=C(C1=CC=C(C(C2=CC=C(OC3=CC=C(O)C(C(C)(C)C)=C3)C=C2)=O)C=C1)C4=CC=CC=C4	0.7	17.8528	306.086	6.9025	1.21956	2.58643
3324	OC1=CC=CC(OC2=CC=C(C=CC=C3)C3=C2)=C1C(C4=C(S(=O)(O)=O)C=CC=C4)=O	O=C(N1)C2=C(C(C1=O)=CC=C3)C3=C(C4=C(C=CC=C5C6=O)C5=C(C(N6C7=CC=C(OC8=CC=C(C9=CC=C(OC%10=C(C(F)(F)F)C=CC=C%10)C=C9)C=C8)C(C(F)(F)F)=C7)=O)C=C4)C=C2	0.9	17.5471	306.069	6.78436	1.49841	2.58641
113	OC1=C(S(=O)(O)=O)C=C(C=C(S(=O)(O)=O)C(OC2=CC=CC=C2C#N)=C3)C3=C1	O=C(C1=CC=C(C(C2=CC=C(OC3=CC=C(O)C(C(C)(C)C)=C3)C=C2)=O)C=C1)C4=CC=CC=C4	0.4	19.4847	292.732	7.53408	1.27451	2.58621
267	O=S(C1=CC=CC(S(=O)(O)=O)=C1)(C2=CC=C(OC3=CC=C(O)C=C3)C(S(=O)(O)=O)=C2)=O	O=C(C1=CC=CC=C1)C2=CC=C(C(C3=CC=CC=C3)=O)C=C2	0.5	20.6909	275.174	8.00091	1.03661	2.58607
3294	OC1=CC=CC(OC2=CC=C(C=CC=C3)C3=C2)=C1C(C4=C(S(=O)(O)=O)C=CC=C4)=O	CC(C1=CC=CC=C1)(C(F)(F)F)C2=CC=C(C3=NC4=C(C=C(N=CS5)C5=C4)S3)C=C2	0.9	20.4491	310.962	7.91085	1.14227	2.58495
1004	O=C(NC1=O)C2=CC=C3C4=C2C1=CC=C4C(N(C5=CC=C(OC6=CC(C=C(OC7=CC=CC=C7)C(S(=O)(O)=O)=C8)=C8C=C6S(=O)(O)=O)C=C5)C3=O)=O	O=C(C1=CC(C(C2=CC=CC=C2)=O)=CC=C1)C(C=C3)=CC=C3OC4=CC=C(C5=CC=C(O)C=C5)C=C4	0.7	17.9859	267.96	6.95903	1.18927	2.58454
1636	O=C(C1=CC=C(OC2=CC=C(S(=O)(O)=O)C=C2)C=C1)C3=CC=CC=C3	O=C(C1=CC=C(C(C2=CC=CC=C2)=O)C=C1)C(C=C3)=CC=C3OC(C(C)=C4)=C(C)C=C4C5=CC(C)=C(O)C(C)=C5	0.8	18.5683	303.509	7.19119	1.17684	2.58209
276	O=C(C1=CC=C(OCCCS(=O)(O)=O)C=C1)C2=CC=C(C(C3=CC=C(OCCCS(=O)(O)=O)C=C3)=O)C=C2	OC1=CC=CC(OC2=CC=C(C=CC=C3)C3=C2)=C1C#N	0.5	19.1208	300.977	7.40542	1.19747	2.582
1633	O=C(C1=CC=C(OC2=CC=C(S(=O)(O)=O)C=C2)C=C1)C3=CC=CC=C3	OC1=C(F)C(F)=C(C2=C(F)C(F)=C(OC3=CC=C(C(C(F)(F)F)(C(F)(F)F)C4=CC=CC=C4)C=C3)C(F)=C2F)C(F)=C1F	0.8	17.6702	315.675	6.84713	1.29131	2.58068
995	O=C(NC1=O)C2=CC=C3C4=C2C1=CC=C4C(N(C5=CC=C(OC6=CC(C=C(OC7=CC=CC=C7)C(S(=O)(O)=O)=C8)=C8C=C6S(=O)(O)=O)C=C5)C3=O)=O	O=C(C1=CC(C2=C(OC)C=CC=C2)=C(OC)C=C1)C(C=C3)=CC=C3OC4=CC=C(C(O)=O)C=C4	0.7	18.5553	289.955	7.19016	1.25947	2.58066
399	O=C(C1=CC=C(OC2=CC=CC=C2)C=C1)C3=CC(C4=C(C=CC=C4)OCCCS(=O)(O)=O)=C(C=C3)OCCCS(=O)(O)=O	OC1=CC=C(C2=CC=C(C3=CC=CC=C3C#N)C=C2)C=C1	0.6	18.0887	285.391	7.0101	1.26047	2.58037
592	O=S(C1=CC=CC(S(=O)(O)=O)=C1)(C2=CC=C(OC3=CC=C(C4=CC=C(O)C=C4)C=C3)C(S(=O)(O)=O)=C2)=O	O=C(C1=C2C(C=CC=C23)=CC=C1)N(C4=CC=CC(C(C5=CC=CC=C5)=O)=C4)C3=O	0.6	17.5813	270.186	6.81931	0.922321	2.57816
1327	O=C(C1=CC=C(OC2=CC=C(P(C3=CC=C(O)C=C3)(C4=CC=CC=C4)=O)C=C2)C(S(=O)(O)=O)=C1)C5=CC(S(=O)(O)=O)=CC=C5	O=P(C1=CC=C(OC2=CC=C(C3=NNC(C4=C3C=CC=C4)=O)C=C2)C=C1)(C5=CC=CC=C5)C6=CC=CC=C6	0.8	19.1824	346.463	7.44418	1.09168	2.57683
296	O=S(C1=CC(S(=O)(O)=O)=C(OC2=CC=CC=C2C3=CC=C(F)C=C3)C=C1)(C4=CC=C(O)C(S(=O)(O)=O)=C4)=O	O=C(C1=CC=CC(C=O)=C1)NC(C=C2)=CC=C2OC3=C(C#N)C(OC4=CC=C(N)C=C4)=CC=C3	0.5	17.5598	271.498	6.81783	1.28936	2.57557
1819	OC1=CC=CC(OC2=CC=C(C=CC=C3)C3=C2)=C1C(C4=C(S(=O)(O)=O)C=CC=C4)=O	O=CC1=CC=CC(C(NC2=CC=CC(C(C(F)(F)F)(C(F)(F)F)C3=CC=C(N)C=C3)=C2)=O)=C1	0.8	19.8973	303.266	7.72572	1.13022	2.57546
1085	O=S(C1=CC=CC(S(=O)(O)=O)=C1)(C2=CC=C(OC3=CC=C(C4=CC=C(O)C=C4)C=C3)C(S(=O)(O)=O)=C2)=O	OC(C=C1)=CC=C1P(C(C=C2)=CC=C2OC(C=C3)=CC=C3C(C4=CC=CC(C(C5=CC=CC=C5)=O)=C4)=O)(C6=CC=CC=C6)=O	0.7	17.5327	353.007	6.8078	0.922851	2.57538
1748	OC1=CC=CC(OC2=CC=C(C=CC=C3)C3=C2)=C1C(C4=C(S(=O)(O)=O)C=CC=C4)=O	O=S(C(C=C1)=CC=C1C2=NC3=CC=C(C4=CC=C(NC=N5)C5=C4)C=C3N2)(C6=CC=CC=C6)=O	0.8	19.4359	282.165	7.54721	1.11955	2.57524
804	O=C(C1=CC=C(OC2=CC=C(P(C3=CC=C(O)C=C3)(C4=CC=CC=C4)=O)C=C2)C(S(=O)(O)=O)=C1)C5=CC(S(=O)(O)=O)=CC=C5	OC(C=C1)=CC=C1C(C=C2)=CC=C2OC3=C(C#N)C=CC=C3	0.7	17.5136	333.968	6.80787	1.20523	2.57255
3259	OC1=CC=CC(OC2=CC=C(C=CC=C3)C3=C2)=C1C(C4=C(S(=O)(O)=O)C=CC=C4)=O	O=CC1=CC=C(OC2=CC=C(C3=NC4=C(C=C(C5=CC(N=CN6)=C6C=C5)C=C4)N3)C=C2)C=C1	0.9	20.3882	304.203	7.92536	1.10142	2.57252
65	O=S(C1=CC=CC=C1)(O)=O	O=C(C1=CC=CC(C(C2=CC=C(OC3=CC=C(C(C)(C)C4=CC=C(O)C=C4)C=C3)C=C2)=O)=C1)C5=CC=CC=C5	0.4	17.8087	303.802	6.93757	1.29449	2.567
1457	OC(C=C1)=CC=C1P(C(C=C2)=CC=C2OC(C(S(=O)(O)=O)=C3)=CC=C3C(C4=CC=CC(C(C5=CC=CC(S(=O)(O)=O)=C5)=O)=C4)=O)(C6=CC=CC=C6)=O	OC1=CC=C(OC2=CC=C(OC3=CC=C(S(C4=CC=CC=C4)(=O)=O)C=C3)C=C2)C=C1	0.8	17.6374	305.079	6.87185	1.15493	2.56662
1864	O=S(C1=CC=CC(C2=CC=CC(S(=O)(O)=O)=C2)=C1)(O)=O	O=S(C1=C(C2=NC3=C(C=C(N=CS4)C4=C3)S2)C=CC=C1)(C5=CC=CC=C5)=O	0.8	18.4358	275.203	7.18396	1.23714	2.56625
1466	OC(C=C1)=CC=C1P(C(C=C2)=CC=C2OC(C(S(=O)(O)=O)=C3)=CC=C3C(C4=CC=CC(C(C5=CC=CC(S(=O)(O)=O)=C5)=O)=C4)=O)(C6=CC=CC=C6)=O	O=C(C1=CC=CC(C=O)=C1)NC(C=C2)=CC=C2OC3=C(C#N)C(OC4=CC=C(N)C=C4)=CC=C3	0.8	17.5556	296.509	6.844	1.26323	2.5651
674	O=S(C1=CC(S(=O)(O)=O)=CC=C1)(C2=CC(S(=O)(O)=O)=C(SC3=CC=C(SC4=CC=C(S)C=C4)C=C3)C=C2)=O	SC1=CC=C(SC2=CC=C(SC3=CC=C(S(C4=CC=CC=C4)(=O)=O)C=C3)C=C2)C=C1	0.6	18.2886	349.48	7.13534	1.13743	2.5631
838	O=S(C1=CC(C2=NC3=C(C=C(N=CS4)C4=C3)S2)=CC5=C(S(=O)(O)=O)C=CC=C51)(O)=O	O=C(C1=CC(C(C2=CC=CC=C2)=O)=CC=C1)C(C=C3)=CC=C3OC4=CC=C(O)C=C4	0.7	17.8422	326.799	6.96421	1.31014	2.56199
807	O=C(C1=CC=C(OC2=CC=C(P(C3=CC=C(O)C=C3)(C4=CC=CC=C4)=O)C=C2)C(S(=O)(O)=O)=C1)C5=CC(S(=O)(O)=O)=CC=C5	OC1=CC=C(C(C2=CC=C(OC3=CC=C(C(C4=CC=CC=C4)=O)C=C3)C=C2)=O)C=C1	0.7	18.0353	346.466	7.04712	1.06999	2.55924
3320	OC1=CC=CC(OC2=CC=C(C=CC=C3)C3=C2)=C1C(C4=C(S(=O)(O)=O)C=CC=C4)=O	O=C(NC1=O)C2=C(C1=CC=C3)C3=C(C4=C(C=CC=C5C(N(C6=CC=C(OC7=CC=CC=C7)C=C6)C8=O)=O)C5=C8C=C4)C=C2	0.9	17.7132	306.98	6.92151	1.15706	2.55916
54	O=S(C1=CC=CC=C1)(O)=O	OC1=C(OC2=CC=C(C(C3=CC(C(C4=CC=CC=C4)=O)=CC=C3)=O)C=C2)C=C5C(C6C=CC5C6)=C1	0.4	18.6908	302.67	7.30584	1.33889	2.55834
1453	OC(C=C1)=CC=C1P(C(C=C2)=CC=C2OC(C(S(=O)(O)=O)=C3)=CC=C3C(C4=CC=CC(C(C5=CC=CC(S(=O)(O)=O)=C5)=O)=C4)=O)(C6=CC=CC=C6)=O	O=S(C(C=C1)=CC=C1OC(C=C2)=CC=C2C3=CC=C(O)C=C3)(C4=CC=CC=C4)=O	0.8	17.6546	305.834	6.90234	1.05274	2.55777
253	SC(C=C1)=CC=C1SC(C=C2)=CC=C2SC(C(S(=O)(O)=O)=C3)=CC=C3S(C4=CC(S(=O)(O)=O)=CC=C4)(=O)=O	O=C(C1=CC=CC=C1)C2=CC=C(C(C3=CC=CC=C3)=O)C=C2	0.5	18.2434	292.852	7.13961	1.19848	2.55525
397	O=C(C1=CC=C(OC2=CC=CC=C2)C=C1)C3=CC(C4=C(C=CC=C4)OCCCS(=O)(O)=O)=C(C=C3)OCCCS(=O)(O)=O	OC1=CC=C(S(C2=CC=C(OC3=CC=C(C4=CC=CC=C4)C=C3)C=C2)(=O)=O)C=C1	0.6	17.6888	289.86	6.92423	1.21509	2.55462
1375	O=C(C1=CC=C(OC2=CC=C(P(C3=CC=C(O)C=C3)(C4=CC=CC=C4)=O)C=C2)C(S(=O)(O)=O)=C1)C5=CC(S(=O)(O)=O)=CC=C5	SC1=CC=C(SC2=CC=C(SC3=CC=C(S(C4=CC=CC=C4)(=O)=O)C=C3)C=C2)C=C1	0.8	17.5264	350.194	6.86177	1.10834	2.55421
594	O=S(C1=CC=CC(S(=O)(O)=O)=C1)(C2=CC=C(OC3=CC=C(C4=CC=C(O)C=C4)C=C3)C(S(=O)(O)=O)=C2)=O	O=C(C1=CC(C(C2=CC=CC=C2)=O)=CC=C1)C(C=C3)=CC=C3OC4=CC=C(O)C=C4	0.6	18.8178	334.335	7.36992	1.04955	2.55333
1779	OC1=CC=CC(OC2=CC=C(C=CC=C3)C3=C2)=C1C(C4=C(S(=O)(O)=O)C=CC=C4)=O	O=C(NC1=O)C2=CC=C3C4=C2C1=CC=C4C(N(C5=NC=NN5)C3=O)=O	0.8	19.682	274.758	7.70848	1.13158	2.55329
950	O=C(C1=CC=C(OC2=CC=C(S(=O)(O)=O)C=C2)C=C1)C3=CC=CC=C3	O=C(C1=CC=C(OC2=CC=C(C(C3=CC=CC=C3C(O)=O)C4=CC=C(O)C=C4)C=C2)C=C1)C5=CC=CC=C5	0.7	17.8373	315.146	6.98962	1.2321	2.55197
29	O=S(C1=CC=CC(C2=CC=CC(S(=O)(O)=O)=C2)=C1)(O)=O	O=S(C1=CC=C(O)C=C1)(C2=CC=C(OC3=CC=C(C(C4=CC=CC=C4)=O)C=C3)C=C2)=O	0.3	18.8557	326.179	7.39104	1.01825	2.55116
619	OC1=CC=C(S(C2=C(OC3=CC=C(C(C4=CC(S(=O)(O)=O)=CC=C4)=O)C=C3S(=O)(O)=O)C=C(OC5=CC=CC=C5)C=C2)(=O)=O)C=C1	O=C(C1=CC=CC(C=O)=C1)NC(C=C2)=CC=C2OC3=C(C#N)C(OC4=CC=C(N)C=C4)=CC=C3	0.6	18.0795	269.733	7.08771	1.21621	2.55083
3326	OC1=CC=CC(OC2=CC=C(C=CC=C3)C3=C2)=C1C(C4=C(S(=O)(O)=O)C=CC=C4)=O	O=C(N1)C2=C(C(C1=O)=CC=C3)C3=C(C4=C(C=CC=C5C6=O)C5=C(C(N6C7=CC=C(OC8=CC=C(C9=CC=C(OC%10=CC=CC=C%10)C=C9)C=C8)C=C7)=O)C=C4)C=C2	0.9	17.5761	309.625	6.89714	1.33897	2.54832
192	O=S(C1=CC=CC=C1)(O)=O	O=C(C1=CC=CC(C(C2=CC=C(OC3=CC=C(C(C)(C)C4=CC=C(O)C=C4)C=C3)C=C2)=O)=C1)C5=CC=CC=C5	0.5	18.1563	286.945	7.12679	1.30184	2.54761
3360	OC1=CC=CC(OC2=CC=C(C=CC=C3)C3=C2)=C1C(C4=C(S(=O)(O)=O)C=CC=C4)=O	OC1=CC=C(C(C(C=C2)=CC=C2OC(C=C3)=CC=C3C(CCC(O)=O)(C)C4=CC=CC=C4)=O)C=C1	0.9	20.6491	315.1	8.10648	1.12964	2.54723
677	OC1=CC(S(=O)(O)=O)=C(OC2=CC=CC=C2C#N)C=C1	O=C(C1=CC=C(C(C2=CC=C(OC3=CC=C(O)C(C(C)(C)C)=C3)C=C2)=O)C=C1)C4=CC=CC=C4	0.6	18.007	296.864	7.0696	1.49357	2.54711
11	O=S(C1=CC=CC=C1)(O)=O	OC(C=C1)=CC=C1C(C)(C)C(C=C2)=CC=C2OC3=CC=C(C(C4=CC=CC=C4)=O)C=C3	0.3	17.8013	330.221	6.98997	1.24789	2.54669
1860	O=S(C1=CC(S(=O)(O)=O)=C(OC2=CC=CC=C2C3=CC=C(F)C=C3)C=C1)(C4=CC=C(O)C(S(=O)(O)=O)=C4)=O	O=C(NC1=O)C2=C(C1=CC=C3)C3=C(C4=C(C=CC=C5C(N(C6=CC=C(N(C7=CC=CC=C7)C8=CC=CC=C8)C=C6)C9=O)=O)C5=C9C=C4)C=C2	0.8	17.6676	345.134	6.94152	0.720737	2.54521
1980	O=S(C1=CC=CC(S(=O)(O)=O)=C1)(C2=CC(S(=O)(O)=O)=C(SC3=CC(C=CC(S)=C4)=C4C=C3)C=C2)=O	SC(C=C1)=CC=C1SC(C=C2)=CC=C2SC3=C(C#N)C=CC=C3	0.8	17.751	348.498	6.9752	1.13322	2.54488
763	CC(C)(C1=CC=C(O)C=C1)C(C=C2)=CC=C2OC(C(S(=O)(O)=O)=C3)=CC=C3S(C4=CC(S(=O)(O)=O)=CC=C4)(=O)=O	O=C(C1=C2C(C=CC=C23)=CC=C1)N(C4=CC=CC(C(C5=CC=CC=C5)=O)=C4)C3=O	0.7	17.7283	282.82	6.96814	1.02582	2.54419
1771	OC1=CC=CC(OC2=CC=C(C=CC=C3)C3=C2)=C1C(C4=C(S(=O)(O)=O)C=CC=C4)=O	OC(C=C1)=CC=C1C(C)(C)C(C=C2)=CC=C2OC3=CC=C(C(C4=CC=CC=C4)=O)C=C3	0.8	20.1607	321.781	7.92527	1.14235	2.54385
1420	O=C(C1=CC=C(OC2=CC=C(P(C3=CC=C(O)C=C3)(C4=CC=CC=C4)=O)C=C2)C(S(=O)(O)=O)=C1)C5=CC(S(=O)(O)=O)=CC=C5	O=C(C1=CC=CC=C1)C2=CC=CC=C2	0.8	19.4745	349.243	7.65606	1.07735	2.54367
186	O=S(C1=CC=CC=C1)(O)=O	OC1=C(OC2=CC=C(C(C3=CC(C(C4=CC=CC=C4)=O)=CC=C3)=O)C=C2)C=C5C(C6C=CC5C6)=C1	0.5	18.3501	282.099	7.21422	1.33981	2.5436
263	O=S(C1=CC=CC(S(=O)(O)=O)=C1)(C2=CC=C(OC3=CC=C(O)C(C4=CC=CC=C4)=C3)C(S(=O)(O)=O)=C2)=O	O=C(C1=CC(C(C2=CC=CC=C2)=O)=CC=C1)C(C=C3)=CC=C3OC4=CC=C(O)C=C4	0.5	19.0201	325.351	7.48071	1.14843	2.54255
1609	O=C(C1=CC=C(OC2=CC=C(S(=O)(O)=O)C=C2)C=C1)C3=CC=CC=C3	[H]/C([H])=C/C(C(F)=C1F)=C(C(F)=C1OC2=CC(C3=CC=C(C(OC4=C(C(F)=C(C(F)=C4F)/C=C([H])\[H])F)=C3)N5C(C6=CC=C(C7=C8C=CC(C5=O)=C67)C(NC8=O)=O)=O)=CC=C2)F	0.8	17.579	272.629	6.91692	1.36709	2.54144
1738	OC1=CC=CC(OC2=CC=C(C=CC=C3)C3=C2)=C1C(C4=C(S(=O)(O)=O)C=CC=C4)=O	O=C(C1=CC=C(F)C=C1)C(C=C2)=CC=C2OC(C=C3)=CC=C3C(C(F)(F)F)(C(F)(F)F)C4=CC=CC=C4	0.8	19.6429	313.415	7.7298	1.24761	2.54119
927	SC(C=C1)=CC=C1SC(C=C2)=CC=C2SC(C(S(=O)(O)=O)=C3)=CC=C3S(C4=CC(S(=O)(O)=O)=CC=C4)(=O)=O	SC1=CC(C=C2)=C(C=C1)C=C2SC3=C(C#N)C=CC=C3	0.7	18.8096	343.183	7.40202	1.17041	2.54115
1401	O=C(C1=CC=C(OC2=CC=C(P(C3=CC=C(O)C=C3)(C4=CC=CC=C4)=O)C=C2)C(S(=O)(O)=O)=C1)C5=CC(S(=O)(O)=O)=CC=C5	OC(C=C1)=CC=C1C(C=C2)=CC=C2OC3=C(C#N)C=CC=C3	0.8	19.2827	348.507	7.59065	1.13845	2.54032
506	O=C(C1=CC=C(OC2=CC=C(S(=O)(O)=O)C=C2)C=C1)C3=CC=CC=C3	O=C(C1=CC=CC=C1)C(C=C2)=CC=C2OC(C(C)=C3)=C(C)C=C3C4=CC(C)=C(O)C(C)=C4	0.6	17.5912	325.035	6.9252	1.23995	2.54017
1800	OC1=CC=CC(OC2=CC=C(C=CC=C3)C3=C2)=C1C(C4=C(S(=O)(O)=O)C=CC=C4)=O	OC1=CC=C(C(C(C=C2)=CC=C2OC(C=C3)=CC=C3C(CCC(O)=O)(C)C4=CC=CC=C4)=O)C=C1	0.8	19.8666	317.15	7.83197	1.18401	2.5366
80	O=S(C1=CC=CC(S(=O)(O)=O)=C1)(C2=CC=C(OC3=CC=C(C=CC(O)=C4)C4=C3)C(S(=O)(O)=O)=C2)=O	O=C(C1=CC(C(C2=CC=CC=C2)=O)=CC=C1)C(C=C3)=CC=C3OC4=CC=C(O)C=C4	0.4	18.1728	316.262	7.17753	1.04826	2.53191
1409	O=C(C1=CC=C(OC2=CC=C(P(C3=CC=C(O)C=C3)(C4=CC=CC=C4)=O)C=C2)C(S(=O)(O)=O)=C1)C5=CC(S(=O)(O)=O)=CC=C5	O=P(C1=CC=C(SC2=CC=C(C(C(F)(F)F)(C(F)(F)F)C3=CC=C(S)C=C3)C=C2)C=C1)(C4=CC=CC=C4)C5=CC=CC=C5	0.8	17.9593	357.277	7.0939	1.13493	2.53165
461	O=S(C1=CC(C2=NC3=C(C=C(N=CS4)C4=C3)S2)=CC5=C(S(=O)(O)=O)C=CC=C51)(O)=O	O=C(C1=CC=C(C(C2=CC=C(OC3=CC=C(O)C(C(C)(C)C)=C3)C=C2)=O)C=C1)C4=CC=CC=C4	0.6	18.2393	290.734	7.2111	1.33893	2.52934
3269	OC1=CC=CC(OC2=CC=C(C=CC=C3)C3=C2)=C1C(C4=C(S(=O)(O)=O)C=CC=C4)=O	OC1=CC=C(C(C(F)(F)F)(C(F)(F)F)C2=CC=C(OC3=CC=C(S(C4=CC=CC=C4)(=O)=O)C=C3)C=C2)C=C1	0.9	20.2315	308.064	8.00019	1.19014	2.52888
1753	OC1=CC=CC(OC2=CC=C(C=CC=C3)C3=C2)=C1C(C4=C(S(=O)(O)=O)C=CC=C4)=O	OC1=C(OC2=CC=C(C(C3=CC(C(C4=CC=CC=C4)=O)=CC=C3)=O)C=C2)C=C5C(C6C=CC5C6)=C1	0.8	19.062	319.846	7.53817	1.22438	2.52873
597	OC1=C(S(=O)(O)=O)C=C(C=C(S(=O)(O)=O)C(OC2=CC=CC=C2C#N)=C3)C3=C1	OC(C=C1)=CC=C1P(C(C=C2)=CC=C2OC(C=C3)=CC=C3C(C4=CC=CC(C(C5=CC=CC=C5)=O)=C4)=O)(C6=CC=CC=C6)=O	0.6	18.6628	306.355	7.38088	1.20516	2.52854
1867	O=S(C1=CC=CC(C2=CC=CC(S(=O)(O)=O)=C2)=C1)(O)=O	SC(C=C1)=CC=C1SC(C=C2)=CC=C2SC3=C(C#N)C=CC=C3	0.8	18.4277	287.67	7.29558	1.21623	2.52588
748	O=C(C1=CC=C(OC2=CC=CC=C2)C=C1)C3=CC(C4=C(C=CC=C4)OCCCS(=O)(O)=O)=C(C=C3)OCCCS(=O)(O)=O	OC1=CC=C(C2=CC=C(C3=CC=CC=C3C#N)C=C2)C=C1	0.7	18.5405	276.304	7.34086	1.1912	2.52566
1471	OC(C=C1)=CC=C1P(C(C=C2)=CC=C2OC(C(S(=O)(O)=O)=C3)=CC=C3C(C4=CC=CC(C(C5=CC=CC(S(=O)(O)=O)=C5)=O)=C4)=O)(C6=CC=CC=C6)=O	N=P(OC1=CC=C(F)C=C1)OC2=CC=C(OC)C=C2	0.8	18.0357	298.623	7.14349	1.19312	2.52478
1763	OC1=CC=CC(OC2=CC=C(C=CC=C3)C3=C2)=C1C(C4=C(S(=O)(O)=O)C=CC=C4)=O	CC(C1=CC=CC=C1)(C(F)(F)F)C2=CC=C(C3=NC4=C(C=C(N=CS5)C5=C4)S3)C=C2	0.8	19.3618	320.866	7.67245	1.21263	2.52355
102	O=S(C1=CC=CC(S(=O)(O)=O)=C1)(C2=CC=C(OC3=CC=C(O)C=C3)C(S(=O)(O)=O)=C2)=O	OC1=CC=C(C(C2=CC=C(OC3=CC=C(C(C4=CC=CC=C4)=O)C=C3)C=C2)=O)C=C1	0.4	20.1456	313.456	7.98461	1.02764	2.52305
485	O=C(C1=CC=C(OC2=CC=C(C(C3=CC=CC=C3C(O)=O)C4=CC=C(O)C=C4)C=C2)C(S(=O)(O)=O)=C1)C5=CC(S(=O)(O)=O)=CC=C5	O=C(C1=CC=C(OC2=CC=C(P(C3=CC=C(O)C=C3)(C4=CC=CC=C4)=O)C=C2)C=C1)C5=CC=CC=C5	0.6	19.8757	312.633	7.88055	1.17782	2.52212
576	O=S(C1=CC=CC(S(=O)(O)=O)=C1)(C2=CC=C(OC3=CC=C(O)C(C4=CC=CC=C4)=C3)C(S(=O)(O)=O)=C2)=O	O=C(C1=CC(C(C2=CC=CC=C2)=O)=CC=C1)C(C=C3)=CC=C3OC4=CC=C(O)C=C4	0.6	18.7806	326.955	7.44676	1.06352	2.52198
740	O=C(C1=CC=C(OC2=CC=CC=C2)C=C1)C3=CC(C4=C(C=CC=C4)OCCCS(=O)(O)=O)=C(C=C3)OCCCS(=O)(O)=O	OC(C=C1)=CC=C1C(C=C2)=CC=C2OC3=C(C#N)C=CC=C3	0.7	18.3945	278.81	7.29703	1.38673	2.52082
5	O=S(C1=CC=CC(C2=CC=CC(S(=O)(O)=O)=C2)=C1)(O)=O	O=S(C1=CC=C(O)C=C1)(C2=CC=C(OC3=CC=C(C(C4=CC=CC=C4)=O)C=C3)C=C2)=O	0.2	17.9337	335.816	7.12036	1.03366	2.51864
1318	O=C(C1=CC=C(OC2=CC=C(P(C3=CC=C(O)C=C3)(C4=CC=CC=C4)=O)C=C2)C(S(=O)(O)=O)=C1)C5=CC(S(=O)(O)=O)=CC=C5	O=C(C1=CC=C(F)C=C1)C(C=C2)=CC=C2OC(C=C3)=CC=C3C(C(F)(F)F)(C(F)(F)F)C4=CC=CC=C4	0.8	18.8015	320.068	7.46779	1.07751	2.51767
1793	OC1=CC=CC(OC2=CC=C(C=CC=C3)C3=C2)=C1C(C4=C(S(=O)(O)=O)C=CC=C4)=O	OC(C=C1)=CC=C1C2(C3=CC=C(OC4=CC=CC=C4C#N)C=C3)C5=C(C=CC=C5)C6=CC=CC=C26	0.8	18.0837	307.726	7.18468	1.26506	2.51699
1456	OC(C=C1)=CC=C1P(C(C=C2)=CC=C2OC(C(S(=O)(O)=O)=C3)=CC=C3C(C4=CC=CC(C(C5=CC=CC(S(=O)(O)=O)=C5)=O)=C4)=O)(C6=CC=CC=C6)=O	O=S(C1=CC=CC=C1)(C2=CC=C(OC3=CC=C(C=CC(O)=C4)C4=C3)C=C2)=O	0.8	17.5266	290.359	6.96882	1.03186	2.515
3315	OC1=CC=CC(OC2=CC=C(C=CC=C3)C3=C2)=C1C(C4=C(S(=O)(O)=O)C=CC=C4)=O	OC(C=C1)=CC=C1C2=CC=C(OC3=CC(N=C4C5=CC=CC=C5)=C(C=C3)N=C4C6=CC=C(OC7=NC8=C(N=C7C9=CC=CC=C9)C=CC=C8)C=C6)C=C2	0.9	18.0185	307.005	7.16926	1.2285	2.5133
1440	O=C(C1=CC=C(OC2=CC=C(P(C3=CC=C(O)C=C3)(C4=CC=CC=C4)=O)C=C2)C(S(=O)(O)=O)=C1)C5=CC(S(=O)(O)=O)=CC=C5	FC(C1=CC(C(C=C2)=CC=C2N3N=NC(C4=CC(C5=CNN=N5)=CC=C4)=C3)=CC=C1OC6=C(C(F)(F)F)C=C(C7=CC=CC=C7)C=C6)(F)F	0.8	17.8939	333.698	7.12084	1.46658	2.5129
1186	OC1=CC(S(=O)(O)=O)=C(OC2=CC=CC=C2C#N)C=C1	O=C(C1=CC=C(C(C2=CC=C(OC3=CC=C(O)C(C(C)(C)C)=C3)C=C2)=O)C=C1)C4=CC=CC=C4	0.7	18.8919	291.895	7.52015	1.52393	2.51217
1731	O=C(NC1=O)C2=CC=C3C4=C2C1=CC=C4C(N(C5=CC=C(OC6=CC(C=C(OC7=CC=CC=C7)C(S(=O)(O)=O)=C8)=C8C=C6S(=O)(O)=O)C=C5)C3=O)=O	O=C(NC1=O)C2=C(C1=CC=C3C(N(C4=CC=C(OC5=CC=C(P(C6=CC=C(OC7=CC=CC=C7)C=C6)(C8=CC=CC=C8)=O)C=C5)C=C4)C9=O)=O)C3=C9C=C2	0.8	18.7446	292.514	7.46925	1.36736	2.50957
784	O=C(C1=CC=C(OC2=CC=C(P(C3=CC=C(O)C=C3)(C4=CC=CC=C4)=O)C=C2)C(S(=O)(O)=O)=C1)C5=CC(S(=O)(O)=O)=CC=C5	O=C(C1=CC=C(C=C1)F)C2=CC=C(C=C2)OC3=CC=C(C=C3)C(C)(C4=CC=C(C=C4)O)C	0.7	18.3991	348.671	7.33185	1.15882	2.50948
1724	O=C(NC1=O)C2=CC=C3C4=C2C1=CC=C4C(N(C5=CC=C(OC6=CC(C=C(OC7=CC=CC=C7)C(S(=O)(O)=O)=C8)=C8C=C6S(=O)(O)=O)C=C5)C3=O)=O	O=C(NC1=O)C2=C(C1=CC=C3C(N(C4=CC=C(OC5=CC=CC=C5)C=C4)C6=O)=O)C3=C6C=C2	0.8	19.7279	292.662	7.86344	1.09342	2.50881
3394	OC1=CC=CC(OC2=CC=C(C=CC=C3)C3=C2)=C1C(C4=C(S(=O)(O)=O)C=CC=C4)=O	O=CC(C=C1)=CC=C1OC(C=C2)=CC=C2C(NC3=CC=C(OC4=CC=C(C(C5=CC=C(OC6=CC=C(N)C=C6)C=C5)(C(F)(F)F)C(F)(F)F)C=C4)C=C3)=O	0.9	18.09	304.176	7.21267	1.26994	2.50809
499	SC(C=C1)=CC=C1SC(C=C2)=CC=C2SC(C(S(=O)(O)=O)=C3)=CC=C3S(C4=CC(S(=O)(O)=O)=CC=C4)(=O)=O	SC(C=C1)=CC=C1SC(C=C2)=CC=C2SC3=C(C#N)C=CC=C3	0.6	19.2057	337.898	7.6585	1.18242	2.50776
754	O=C(C1=CC=C(OC2=CC=CC=C2)C=C1)C3=CC(C4=C(C=CC=C4)OCCCS(=O)(O)=O)=C(C=C3)OCCCS(=O)(O)=O	O=C(C1=CC=C(C2=CC=C(OC3=CC=CC=C3)C=C2)C=C1)C4=CC=CC=C4	0.7	18.7972	270.33	7.49587	1.21229	2.50767
1718	O=C(NC1=O)C2=CC=C3C4=C2C1=CC=C4C(N(C5=CC=C(OC6=CC(C=C(OC7=CC=CC=C7)C(S(=O)(O)=O)=C8)=C8C=C6S(=O)(O)=O)C=C5)C3=O)=O	O=C(N1)C2=C(C(C1=O)=CC=C3)C3=C(C4=C(C=CC=C5C6=O)C5=C(C(N6C7=CC=C(OC8=CC=C(C9=CC=C(OC%10=CC=CC=C%10)C=C9)C=C8)C=C7)=O)C=C4)C=C2	0.8	18.6007	280.872	7.41872	1.34386	2.50726
79	O=S(C1=CC=CC(S(=O)(O)=O)=C1)(C2=CC=C(OC3=CC=C(C=CC(O)=C4)C4=C3)C(S(=O)(O)=O)=C2)=O	OC1=CC=C(C(C2=CC=C(OC3=CC=C(C(C4=CC=CC=C4)=O)C=C3)C=C2)=O)C=C1	0.4	18.1796	316.057	7.25163	1.04849	2.50696
3334	OC1=CC=CC(OC2=CC=C(C=CC=C3)C3=C2)=C1C(C4=C(S(=O)(O)=O)C=CC=C4)=O	O=C(NC1=O)C2=CC=C3C4=C2C1=CC=C4C(N(C5=CC6=C(NC7=C6C=C(C)C=C7)C=C5)C3=O)=O	0.9	20.553	307.342	8.19919	1.08115	2.50672
3358	OC1=CC=CC(OC2=CC=C(C=CC=C3)C3=C2)=C1C(C4=C(S(=O)(O)=O)C=CC=C4)=O	O=S(C1=CC=C(S(=O)(O)=O)C=C1)(O)=O	0.9	20.9038	301.027	8.34182	1.07339	2.5059
623	O=S(C1=CC=C(O)C(S(=O)(O)=O)=C1)(C2=CC(S(=O)(O)=O)=C(OC3=CC=C(C=C(O)C=C4)C4=C3)C=C2)=O	OC(C=C1)=CC=C1P(C(C=C2)=CC=C2OC(C=C3)=CC=C3C(C4=CC=CC(C(C5=CC=CC=C5)=O)=C4)=O)(C6=CC=CC=C6)=O	0.6	19.012	327.977	7.58715	1.06507	2.50582
928	SC(C=C1)=CC=C1SC(C=C2)=CC=C2SC(C(S(=O)(O)=O)=C3)=CC=C3S(C4=CC(S(=O)(O)=O)=CC=C4)(=O)=O	SC(C=C1)=CC=C1SC(C=C2)=CC=C2SC3=C(C#N)C=CC=C3	0.7	18.7142	347.286	7.47062	1.17287	2.50503
57	O=S(C1=CC=CC=C1)(O)=O	O=C(C1=CC=CC=C1)C(C=C2)=CC=C2OC(C(C)=C3)=C(C)C=C3C4=CC(C)=C(O)C(C)=C4	0.4	18.3885	314.795	7.34153	1.24191	2.50473
3244	OC1=CC=CC(OC2=CC=C(C=CC=C3)C3=C2)=C1C(C4=C(S(=O)(O)=O)C=CC=C4)=O	O=S(C1=CC=C(O)C=C1)(C2=CC=C(OC3=CC=C(C(C(F)(F)F)(C(F)(F)F)C4=CC=CC=C4)C=C3)C=C2)=O	0.9	20.18	308.387	8.05796	1.1859	2.50436
1505	O=C(C1=CC=C(OC2=CC=C(C(C3=CC=CC=C3C(O)=O)C4=CC=C(O)C=C4)C=C2)C(S(=O)(O)=O)=C1)C5=CC(S(=O)(O)=O)=CC=C5	O=C(N1)C2=C(C(C1=O)=CC=C3)C3=C(C4=C(C=CC=C5C6=O)C5=C(C(N6C7=CC=C(OC8=CC=C(C9=CC=C(OC%10=CC=CC=C%10)C=C9)C=C8)C=C7)=O)C=C4)C=C2	0.8	18.7175	272.286	7.47685	1.417	2.5034
3352	OC1=CC=CC(OC2=CC=C(C=CC=C3)C3=C2)=C1C(C4=C(S(=O)(O)=O)C=CC=C4)=O	OC1=CC=C(S(=O)(C2=CC=C(OC3=CC=C(S(C4=CC=CC=C4)(=O)=O)C=C3)C=C2)=O)C=C1	0.9	20.4477	307.105	8.16965	1.08633	2.50289
3297	OC1=CC=CC(OC2=CC=C(C=CC=C3)C3=C2)=C1C(C4=C(S(=O)(O)=O)C=CC=C4)=O	O=C(C1=CC=CC=C1)C(C=C2)=CC=C2OC(C(C)=C3)=C(C)C=C3C4=CC(C)=C(O)C(C)=C4	0.9	20.825	309.515	8.32365	1.13351	2.50191
800	O=C(C1=CC=C(OC2=CC=C(P(C3=CC=C(O)C=C3)(C4=CC=CC=C4)=O)C=C2)C(S(=O)(O)=O)=C1)C5=CC(S(=O)(O)=O)=CC=C5	OC(C=C1)=CC=C1C(C(F)(F)F)(C(F)(F)F)C(C=C2)=CC=C2OC3=CC=C(C(C4=CC=CC=C4)=O)C=C3	0.7	17.5352	352.171	7.00928	1.06299	2.5017
573	O=S(C1=CC=CC(S(=O)(O)=O)=C1)(C2=CC=C(OC3=CC=C(O)C(C4=CC=CC=C4)=C3)C(S(=O)(O)=O)=C2)=O	O=C(C1=CC=CC=C1)C2=CC=C(C(C3=CC=CC=C3)=O)C=C2	0.6	18.6434	315.774	7.45875	0.99368	2.49954
1338	O=C(C1=CC=C(OC2=CC=C(P(C3=CC=C(O)C=C3)(C4=CC=CC=C4)=O)C=C2)C(S(=O)(O)=O)=C1)C5=CC(S(=O)(O)=O)=CC=C5	OC1=CC=C(C2(C3=CC=CC=C3C4=CC=CC=C42)C5=CC=C(OC6=CC=C(P(C7=CC=CC=C7)(C8=CC=CC=C8)=O)C=C6)C=C5)C=C1	0.8	17.8698	361.545	7.15156	1.08621	2.49873
1749	OC1=CC=CC(OC2=CC=C(C=CC=C3)C3=C2)=C1C(C4=C(S(=O)(O)=O)C=CC=C4)=O	O=S(C1=CC=CC=C1C2=NC3=CC=C(C4=CC=C(N=CN5)C5=C4)C=C3N2)(C6=CC=CC=C6)=O	0.8	19.418	281.682	7.77163	1.12041	2.49857
3303	OC1=CC=CC(OC2=CC=C(C=CC=C3)C3=C2)=C1C(C4=C(S(=O)(O)=O)C=CC=C4)=O	O=C(C1=CC=CC2=C1C3=CC=C2)N(NC4=CC=C(CC5=CC=C(NN(C6=O)C(C7=C(C6=CC=C8)C8=CC=C7)=O)C(C)=C5)C=C4C)C3=O	0.9	18.1666	299.495	7.27382	1.15862	2.49753
589	O=S(C1=CC=CC(S(=O)(O)=O)=C1)(C2=CC=C(OC3=CC=C(C4=CC=C(O)C=C4)C=C3)C(S(=O)(O)=O)=C2)=O	O=C(C1=CC=CC(C=O)=C1)NC(C=C2)=CC=C2OC3=C(C#N)C(OC4=CC=C(N)C=C4)=CC=C3	0.6	18.1965	288.981	7.28691	1.09825	2.49716
343	OC1=CC(S(=O)(O)=O)=C(OC2=CC=CC=C2C#N)C=C1	O=C(C1=CC=C(C(C2=CC=C(OC3=CC=C(O)C(C(C)(C)C)=C3)C=C2)=O)C=C1)C4=CC=CC=C4	0.5	18.0721	301.052	7.23886	1.47206	2.49654
3309	OC1=CC=CC(OC2=CC=C(C=CC=C3)C3=C2)=C1C(C4=C(S(=O)(O)=O)C=CC=C4)=O	O=C(C1=CC=C(OC2=CC=C(C(C3=CC=CC=C3C(O)=O)C4=CC=C(O)C=C4)C=C2)C=C1)C5=CC=CC=C5	0.9	19.7024	319.224	7.89308	1.16724	2.49616
268	O=S(C1=CC=CC(S(=O)(O)=O)=C1)(C2=CC=C(OC3=CC=C(O)C=C3)C(S(=O)(O)=O)=C2)=O	OC1=CC=C(C(C2=CC=C(OC3=CC=C(C(C4=CC=CC=C4)=O)C=C3)C=C2)=O)C=C1	0.5	20.1053	324.563	8.05763	0.97528	2.49519
126	O=S(C1=CC=CC(C2=CC=CC(S(=O)(O)=O)=C2)=C1)(O)=O	O=S(C1=CC=C(O)C=C1)(C2=CC=C(OC3=CC=C(C(C4=CC=CC=C4)=O)C=C3)C=C2)=O	0.4	18.5356	322.753	7.4405	0.996538	2.49118
1708	O=C(NC1=O)C2=CC=C3C4=C2C1=CC=C4C(N(C5=CC=C(OC6=CC(C=C(OC7=CC=CC=C7)C(S(=O)(O)=O)=C8)=C8C=C6S(=O)(O)=O)C=C5)C3=O)=O	O=C(NC1=O)C2=C(C1=CC=C3)C3=C(C4=C(C=CC=C5C(N(C6=CC=C(N(C7=CC=CC=C7)C8=CC=CC=C8)C=C6)C9=O)=O)C5=C9C=C4)C=C2	0.8	18.3563	274.104	7.37566	1.19746	2.48877
298	O=S(C1=CC(S(=O)(O)=O)=C(OC2=CC=CC=C2C3=CC=C(F)C=C3)C=C1)(C4=CC=C(O)C(S(=O)(O)=O)=C4)=O	O=C(C1=CC(C(C2=CC=CC=C2)=O)=CC=C1)C(C=C3)=CC=C3OC4=CC=C(O)C=C4	0.5	17.5227	329.933	7.0417	1.23024	2.48841
1729	O=C(NC1=O)C2=CC=C3C4=C2C1=CC=C4C(N(C5=CC=C(OC6=CC(C=C(OC7=CC=CC=C7)C(S(=O)(O)=O)=C8)=C8C=C6S(=O)(O)=O)C=C5)C3=O)=O	O=C(C1=CC=C(C2=CC=C(OC3=CC=CC=C3)C=C2)C=C1)C4=CC=CC=C4	0.8	18.9347	296.028	7.61031	1.17014	2.48804
730	O=C(C1=CC=C(OC2=CC=CC=C2)C=C1)C3=CC(C4=C(C=CC=C4)OCCCS(=O)(O)=O)=C(C=C3)OCCCS(=O)(O)=O	OC1=CC=C(OC2=CC=C(OC3=CC=C(S(C4=CC=CC=C4)(=O)=O)C=C3)C=C2)C=C1	0.7	17.8487	288.508	7.1744	1.47858	2.48783
3292	OC1=CC=CC(OC2=CC=C(C=CC=C3)C3=C2)=C1C(C4=C(S(=O)(O)=O)C=CC=C4)=O	CC(C)(C1=CC=C(OC2=CC=C(S(C3=CC=CC=C3)(=O)=O)C=C2)C=C1)C4=CC=C(O)C=C4	0.9	20.4016	313.33	8.20259	1.12961	2.48722
2769	OC(C=C1)=CC=C1P(C(C=C2)=CC=C2OC(C(S(=O)(O)=O)=C3)=CC=C3C(C4=CC=CC(C(C5=CC=CC(S(=O)(O)=O)=C5)=O)=C4)=O)(C6=CC=CC=C6)=O	SC(C=C1)=CC=C1SC(C=C2)=CC=C2SC3=C(C#N)C=CC=C3	0.9	18.1491	294.838	7.29781	1.13365	2.48693
285	OC1=C(S(=O)(O)=O)C=C(C=C(S(=O)(O)=O)C(OC2=CC=CC=C2C#N)=C3)C3=C1	OC(C=C1)=CC=C1P(C(C=C2)=CC=C2OC(C=C3)=CC=C3C(C4=CC=CC(C(C5=CC=CC=C5)=O)=C4)=O)(C6=CC=CC=C6)=O	0.5	18.1129	321.088	7.28333	1.24207	2.48689
1217	O=S(C1=CC=CC=C1)(O)=O	SC1=CC=C(SC2=CC=C(SC3=CC=C(S(C4=CC=CC=C4)(=O)=O)C=C3)C=C2)C=C1	0.8	18.6151	280.622	7.48532	1.30249	2.48688
3329	OC1=CC=CC(OC2=CC=C(C=CC=C3)C3=C2)=C1C(C4=C(S(=O)(O)=O)C=CC=C4)=O	O=C(C1=CC=C(CCCCCCCCCCCCCCCCCC)C=C1)C2=CC=CC=C2	0.9	19.4515	316.504	7.82443	1.17127	2.486
1514	O=C(C1=CC=C(OC2=CC=C(C(C3=CC=CC=C3C(O)=O)C4=CC=C(O)C=C4)C=C2)C(S(=O)(O)=O)=C1)C5=CC(S(=O)(O)=O)=CC=C5	N#CC1=C(C2=CC=C(OC3=CC=CC=C3)C=C2)C=CC=C1	0.8	18.1853	282.379	7.31666	1.18885	2.48547
2673	OC(C=C1)=CC=C1P(C(C=C2)=CC=C2OC(C(S(=O)(O)=O)=C3)=CC=C3C(C4=CC=CC(C(C5=CC=CC(S(=O)(O)=O)=C5)=O)=C4)=O)(C6=CC=CC=C6)=O	O=CC1=CC=C(OC2=CC=C(C3=NC4=C(C=C(C5=CC(N=CN6)=C6C=C5)C=C4)N3)C=C2)C=C1	0.9	18.5124	281.489	7.45109	1.11856	2.48452
795	O=C(C1=CC=C(OC2=CC=C(P(C3=CC=C(O)C=C3)(C4=CC=CC=C4)=O)C=C2)C(S(=O)(O)=O)=C1)C5=CC(S(=O)(O)=O)=CC=C5	O=C(C1=CC=C(OC2=CC=C(C(C3=CC=CC=C3C4=NC(C=CC=C5)=C5N4)C6=CC=C(O)C=C6)C=C2)C=C1)C7=CC=CC=C7	0.7	17.9798	313.566	7.23792	1.17556	2.48411
811	O=C(C1=CC=C(OC2=CC=C(P(C3=CC=C(O)C=C3)(C4=CC=CC=C4)=O)C=C2)C(S(=O)(O)=O)=C1)C5=CC(S(=O)(O)=O)=CC=C5	O=C(C1=CC=CC(C(C2=CC=C(OC3=CC=C(C(C)(C)C4=CC=C(O)C=C4)C=C3)C=C2)=O)=C1)C5=CC=CC=C5	0.7	17.677	351.306	7.11707	1.10773	2.48375
1710	O=C(NC1=O)C2=CC=C3C4=C2C1=CC=C4C(N(C5=CC=C(OC6=CC(C=C(OC7=CC=CC=C7)C(S(=O)(O)=O)=C8)=C8C=C6S(=O)(O)=O)C=C5)C3=O)=O	O=C1N(C2=CC=CC=C2C(F)(F)F)C(C3=CC=CC4=C3C1=CC=C4)=O	0.8	18.1894	288.886	7.32461	1.36433	2.48332
3313	OC1=CC=CC(OC2=CC=C(C=CC=C3)C3=C2)=C1C(C4=C(S(=O)(O)=O)C=CC=C4)=O	O=S(C1=CC=CC=C1)(C2=CC=C(OC3=CC=C(S(=O)(C4=CC=CC=C4)=O)C=C3)C=C2)=O	0.9	20.1797	306.906	8.1263	1.09754	2.48326
260	O=S(C1=CC=CC(S(=O)(O)=O)=C1)(C2=CC=C(OC3=CC=C(O)C(C4=CC=CC=C4)=C3)C(S(=O)(O)=O)=C2)=O	O=C(C1=CC=CC=C1)C2=CC=C(C(C3=CC=CC=C3)=O)C=C2	0.5	18.3497	294.511	7.39025	1.09871	2.48297
945	O=C(C1=CC=C(OC2=CC=C(S(=O)(O)=O)C=C2)C=C1)C3=CC=CC=C3	O=C(C1=CC=C(C(C2=CC=CC=C2)=O)C=C1)C(C=C3)=CC=C3OC(C(C)=C4)=C(C)C=C4C5=CC(C)=C(O)C(C)=C5	0.7	17.8119	307.422	7.17389	1.20084	2.48287
1761	OC1=CC=CC(OC2=CC=C(C=CC=C3)C3=C2)=C1C(C4=C(S(=O)(O)=O)C=CC=C4)=O	CC(C)(C1=CC=C(OC2=CC=C(S(C3=CC=CC=C3)(=O)=O)C=C2)C=C1)C4=CC=C(O)C=C4	0.8	19.2041	314.832	7.73592	1.16506	2.48245
1765	OC1=CC=CC(OC2=CC=C(C=CC=C3)C3=C2)=C1C(C4=C(S(=O)(O)=O)C=CC=C4)=O	O=S(C1=CC=CC=C1)(C2=CC=C(OC3=CC=C(O)C(C(C)(C)C)=C3)C=C2)=O	0.8	19.475	310.739	7.84765	1.18278	2.48163
3401	OC1=CC=CC(OC2=CC=C(C=CC=C3)C3=C2)=C1C(C4=C(S(=O)(O)=O)C=CC=C4)=O	O=C(NC1=O)C2=C(C1=CC=C3C(N(C4=CC=C(OC5=CC=C(P(C6=CC=C(OC7=CC=CC=C7)C=C6)(C8=CC=CC=C8)=O)C=C5)C=C4)C9=O)=O)C3=C9C=C2	0.9	17.8988	310.416	7.21609	1.19224	2.48041
1657	O=C(C1=CC=C(OC2=CC=C(S(=O)(O)=O)C=C2)C=C1)C3=CC=CC=C3	O=C(C1=CC=C(OC2=CC=C(C(C3=C(F)C(F)=C(OC4=CC=C(C(C(F)(F)F)(C(F)(F)F)C5=CC=C(O)C=C5)C=C4)C(F)=C3F)=O)C=C2)C=C1)C6=C(F)C(F)=CC(F)=C6F	0.8	17.839	310.199	7.19227	1.4894	2.4803
179	C=C(C1=CC=C(C(S(=O)(O)=O)=C1)F)C2=CC=C(C(S(=O)(O)=O)=C2)OC3=CC=C(C=C3)C4=CC=C(C=C4)OC5=CC=C(C=C5S(=O)(O)=O)C(C6=CC=C(C(S(=O)(O)=O)=C6)F)=C	O=C(C1=CC=CC=C1)C2=CC=C(C(C3=CC=CC=C3)=O)C=C2	0.5	18.2648	278.351	7.36462	1.23243	2.48007
1776	OC1=CC=CC(OC2=CC=C(C=CC=C3)C3=C2)=C1C(C4=C(S(=O)(O)=O)C=CC=C4)=O	O=C(C1=CC=C(CCCCCCCCCCCC)C=C1)C2=CC=CC=C2	0.8	18.8946	316.735	7.62056	1.13119	2.47943
392	O=C(C1=CC=C(OC2=CC=CC=C2)C=C1)C3=CC(C4=C(C=CC=C4)OCCCS(=O)(O)=O)=C(C=C3)OCCCS(=O)(O)=O	O=P(C1=CC=C(OC2=CC=C(O)C=C2)C=C1)(C3=CC=CC=C3)C4=CC=CC=C4	0.6	18.1216	297.051	7.30898	1.27656	2.47936
1764	OC1=CC=CC(OC2=CC=C(C=CC=C3)C3=C2)=C1C(C4=C(S(=O)(O)=O)C=CC=C4)=O	O=C(C1=CC=CC=C1)C(C=C2)=CC=C2OC(C(C)=C3)=C(C)C=C3C4=CC(C)=C(O)C(C)=C4	0.8	19.9107	313.72	8.03248	1.17838	2.47877
274	O=S(C1=CC=CC(S(=O)(O)=O)=C1)(C2=CC=C(OC3=CC=C(C4=CC=C(O)C=C4)C=C3)C(S(=O)(O)=O)=C2)=O	O=C(C1=CC(C(C2=CC=CC=C2)=O)=CC=C1)C(C=C3)=CC=C3OC4=CC=C(O)C=C4	0.5	18.8166	330.065	7.59454	1.12923	2.47765
1799	OC1=CC=CC(OC2=CC=C(C=CC=C3)C3=C2)=C1C(C4=C(S(=O)(O)=O)C=CC=C4)=O	O=C(NC1=O)C2=CC=C3C4=C2C1=CC=C4C(N(CCCCCCCCCC)C3=O)=O	0.8	18.5246	303.953	7.47747	1.10545	2.47739
857	O=C(C1=CC=C(OC2=CC=C(C(C3=CC=CC=C3C(O)=O)C4=CC=C(O)C=C4)C=C2)C(S(=O)(O)=O)=C1)C5=CC(S(=O)(O)=O)=CC=C5	OC(C=C1)=CC=C1P(C(C=C2)=CC=C2OC(C=C3)=CC=C3C(C4=CC=CC(C(C5=CC=CC=C5)=O)=C4)=O)(C6=CC=CC=C6)=O	0.7	19.3401	272.96	7.80908	1.18241	2.47661
261	O=S(C1=CC=CC(S(=O)(O)=O)=C1)(C2=CC=C(OC3=CC=C(O)C(C4=CC=CC=C4)=C3)C(S(=O)(O)=O)=C2)=O	OC1=CC=C(C(C2=CC=C(OC3=CC=C(C(C4=CC=CC=C4)=O)C=C3)C=C2)=O)C=C1	0.5	19.0202	325.591	7.68324	1.14701	2.47554
2762	OC(C=C1)=CC=C1P(C(C=C2)=CC=C2OC(C(S(=O)(O)=O)=C3)=CC=C3C(C4=CC=CC(C(C5=CC=CC(S(=O)(O)=O)=C5)=O)=C4)=O)(C6=CC=CC=C6)=O	N=P(OC1=CC=C(F)C=C1)OC2=CC=C(OC)C=C2	0.9	18.2998	302.408	7.39258	1.12535	2.47543
1463	OC(C=C1)=CC=C1P(C(C=C2)=CC=C2OC(C(S(=O)(O)=O)=C3)=CC=C3C(C4=CC=CC(C(C5=CC=CC(S(=O)(O)=O)=C5)=O)=C4)=O)(C6=CC=CC=C6)=O	O=S(C1=CC=CC=C1)(C2=CC=C(OC3=CC=C(O)C=C3)C=C2)=O	0.8	17.7501	302.265	7.17318	1.04157	2.47452
3331	OC1=CC=CC(OC2=CC=C(C=CC=C3)C3=C2)=C1C(C4=C(S(=O)(O)=O)C=CC=C4)=O	O=C(C1=CC=C(OC2=CC=C(C(C3=C(F)C(F)=C(OC4=CC=C(C(C(F)(F)F)(C(F)(F)F)C5=CC=C(O)C=C5)C=C4)C(F)=C3F)=O)C=C2)C=C1)C6=C(F)C(F)=CC(F)=C6F	0.9	18.0593	309.802	7.30098	1.44262	2.47355
3353	OC1=CC=CC(OC2=CC=C(C=CC=C3)C3=C2)=C1C(C4=C(S(=O)(O)=O)C=CC=C4)=O	CC(C)(C1=CC=C(OCC2=CN(CC3=CC=CC=C3)N=N2)C=C1)C4=CC=C(C=C4)OCC5=CNN=N5	0.9	19.7784	305.289	8.00185	1.22821	2.47173
2678	OC(C=C1)=CC=C1P(C(C=C2)=CC=C2OC(C(S(=O)(O)=O)=C3)=CC=C3C(C4=CC=CC(C(C5=CC=CC(S(=O)(O)=O)=C5)=O)=C4)=O)(C6=CC=CC=C6)=O	C1(C2=NC3=CC=C(C4=CC=C(NC=N5)C5=C4)C=C3N2)=CC=CC6=C1C=CC=C6	0.9	17.8385	274.691	7.21905	1.05435	2.47103
953	O=C(C1=CC=C(OC2=CC=C(S(=O)(O)=O)C=C2)C=C1)C3=CC=CC=C3	O=S(C1=CC=CC=C1)(C2=CC=C(OC3=CC=C(S(=O)(C4=CC=CC=C4)=O)C=C3)C=C2)=O	0.7	17.9926	293.921	7.28523	1.0363	2.46974
3267	OC1=CC=CC(OC2=CC=C(C=CC=C3)C3=C2)=C1C(C4=C(S(=O)(O)=O)C=CC=C4)=O	O=S(C(C=C1)=CC=C1C2=NC3=CC=C(C4=CC=C(NC=N5)C5=C4)C=C3N2)(C6=CC=CC=C6)=O	0.9	20.261	306.04	8.20795	1.09117	2.46846
3268	OC1=CC=CC(OC2=CC=C(C=CC=C3)C3=C2)=C1C(C4=C(S(=O)(O)=O)C=CC=C4)=O	O=S(C1=CC=CC=C1C2=NC3=CC=C(C4=CC=C(N=CN5)C5=C4)C=C3N2)(C6=CC=CC=C6)=O	0.9	20.4458	305.99	8.28368	1.09204	2.4682
2775	OC(C=C1)=CC=C1P(C(C=C2)=CC=C2OC(C(S(=O)(O)=O)=C3)=CC=C3C(C4=CC=CC(C(C5=CC=CC(S(=O)(O)=O)=C5)=O)=C4)=O)(C6=CC=CC=C6)=O	N#CC1=C(C2=CC=C(OC3=CC=CC=C3)C=C2)C=CC=C1	0.9	17.8938	294.223	7.25089	1.08375	2.46781
1709	O=C(NC1=O)C2=CC=C3C4=C2C1=CC=C4C(N(C5=CC=C(OC6=CC(C=C(OC7=CC=CC=C7)C(S(=O)(O)=O)=C8)=C8C=C6S(=O)(O)=O)C=C5)C3=O)=O	O=C(C1=CC=C(OC2=C(C=CC=C3C(N(C4=CC=CC=C4C)C5=O)=O)C3=C5C=C2)C=C1)C6=CC=CC=C6	0.8	18.9122	280.94	7.66639	1.20341	2.46689
1828	OC1=CC=CC(OC2=CC=C(C=CC=C3)C3=C2)=C1C(C4=C(S(=O)(O)=O)C=CC=C4)=O	CCCCCCN(C1=O)C(C2=CC=CC(C2=C1C=C3)=C3C4=C5C(C6=CC=C5)=C(C(NC6=O)=O)C=C4)=O	0.8	18.3568	283.78	7.4513	1.14538	2.46357
491	O=C(C1=CC=C(OC2=CC=C(C(C3=CC=CC=C3C(O)=O)C4=CC=C(O)C=C4)C=C2)C(S(=O)(O)=O)=C1)C5=CC(S(=O)(O)=O)=CC=C5	O=C(C1=CC(C(C2=CC=CC=C2)=O)=CC=C1)C(C=C3)=CC=C3OC4=CC=C(C5=CC=C(O)C=C5)C=C4	0.6	18.1676	305.857	7.3752	1.32251	2.46334
3325	OC1=CC=CC(OC2=CC=C(C=CC=C3)C3=C2)=C1C(C4=C(S(=O)(O)=O)C=CC=C4)=O	O=C(N1)C2=C(C(C1=O)=CC=C3)C3=C(C4=C(C=CC=C5C6=O)C5=C(C(N6C7=CC(C(F)(F)F)=C(OC8=CC=C(OC9=CC=CC=C9C(F)(F)F)C=C8)C=C7)=O)C=C4)C=C2	0.9	17.7766	303.498	7.21705	1.47013	2.46314
16	O=S(C1=CC=CC=C1)(O)=O	OC1=CC=C(C(C(C=C2)=CC=C2OC(C=C3)=CC=C3C(CCC(O)=O)(C)C4=CC=CC=C4)=O)C=C1	0.3	18.3065	323.137	7.43422	1.34473	2.46246
582	O=S(C1=CC=CC(S(=O)(O)=O)=C1)(C2=CC=C(OC3=CC=C(O)C=C3)C(S(=O)(O)=O)=C2)=O	O=C(C1=CC=CC(C=O)=C1)NC(C=C2)=CC=C2OC3=C(C#N)C(OC4=CC=C(N)C=C4)=CC=C3	0.6	19	271.825	7.72012	1.04677	2.4611
1120	OC1=CC=C(S(C2=C(OC3=CC=C(C(C4=CC(S(=O)(O)=O)=CC=C4)=O)C=C3S(=O)(O)=O)C=C(OC5=CC=CC=C5)C=C2)(=O)=O)C=C1	O=C(C1=CC=C(OC2=CC=C(P(C3=CC=C(O)C=C3)(C4=CC=CC=C4)=O)C=C2)C=C1)C5=CC=CC=C5	0.7	18.1601	336.588	7.38533	1.09653	2.45893
395	O=C(C1=CC=C(OC2=CC=CC=C2)C=C1)C3=CC(C4=C(C=CC=C4)OCCCS(=O)(O)=O)=C(C=C3)OCCCS(=O)(O)=O	O=S(C1=CC=C(OC2=CC=CC=C2C3=CC=C(F)C=C3)C=C1)(C4=CC=C(O)C=C4)=O	0.6	17.8579	297.648	7.26332	1.30578	2.45864
609	OC1=C(S(=O)(O)=O)C=C(C=C(S(=O)(O)=O)C(OC2=CC=CC=C2C#N)=C3)C3=C1	O=C(NC1=O)C2=C(C1=CC=C3C(N(C4=CC=C(OC5=CC=C(P(C6=CC=C(OC7=CC=CC=C7)C=C6)(C8=CC=CC=C8)=O)C=C5)C=C4)C9=O)=O)C3=C9C=C2	0.6	17.5809	354.161	7.15077	1.37493	2.4586
2768	OC(C=C1)=CC=C1P(C(C=C2)=CC=C2OC(C(S(=O)(O)=O)=C3)=CC=C3C(C4=CC=CC(C(C5=CC=CC(S(=O)(O)=O)=C5)=O)=C4)=O)(C6=CC=CC=C6)=O	SC1=CC(C=C2)=C(C=C1)C=C2SC3=C(C#N)C=CC=C3	0.9	17.8986	283.02	7.28015	1.1208	2.45855
1862	O=S(C1=CC(S(=O)(O)=O)=C(OC2=CC=CC=C2C3=CC=C(F)C=C3)C=C1)(C4=CC=C(O)C(S(=O)(O)=O)=C4)=O	O=C(NC1=O)C2=C(C1=CC=C3)C3=C(C4=C(C=CC=C5C(N(C6=CC=C(OC7=CC=CC=C7)C=C6)C8=O)=O)C5=C8C=C4)C=C2	0.8	17.7124	362.037	7.20494	0.746857	2.45837
839	O=C(C1=CC(S(=O)(O)=O)=CC=C1)C(C=C2S(=O)(O)=O)=CC=C2OC(C(C)=C3)=C(C)C=C3C4=CC(C)=C(O)C(C)=C4	O=S(C1=CC=CC=C1)(C2=CC=C(OC3=CC=C(C(C4=CC=C(OC5=CC=C(S(C6=CC=CC=C6)(=O)=O)C=C5)C=C4)=O)C=C3)C=C2)=O	0.7	17.5011	319.945	7.12255	1.11744	2.45714
3305	OC1=CC=CC(OC2=CC=C(C=CC=C3)C3=C2)=C1C(C4=C(S(=O)(O)=O)C=CC=C4)=O	O=S(C1=CC=CC=C1)(C2=CC=C(OC3=CC=C(O)C(C(C)(C)C)=C3)C=C2)=O	0.9	20.1562	310.268	8.20418	1.13737	2.45682
216	O=S(C1=CC=CC(S(=O)(O)=O)=C1)(C2=CC=C(OC3=CC=C(C=CC(O)=C4)C4=C3)C(S(=O)(O)=O)=C2)=O	O=C(C1=CC(C(C2=CC=CC=C2)=O)=CC=C1)C(C=C3)=CC=C3OC4=CC=C(O)C=C4	0.5	19.0254	323.025	7.74496	0.957232	2.45649
1368	O=C(C1=CC=C(OC2=CC=C(P(C3=CC=C(O)C=C3)(C4=CC=CC=C4)=O)C=C2)C(S(=O)(O)=O)=C1)C5=CC(S(=O)(O)=O)=CC=C5	O=C(C1=CC=C(OC2=CC=C(C(C3=CC=CC=C3C4=NC(C=CC=C5)=C5N4)C6=CC=C(O)C=C6)C=C2)C=C1)C7=CC=CC=C7	0.8	19.7686	348.006	8.0491	1.14297	2.456
1403	O=C(C1=CC=C(OC2=CC=C(P(C3=CC=C(O)C=C3)(C4=CC=CC=C4)=O)C=C2)C(S(=O)(O)=O)=C1)C5=CC(S(=O)(O)=O)=CC=C5	O=C(C1=CC=CC(C=O)=C1)NC(C=C2)=CC=C2OC3=C(C#N)C(OC4=CC=C(N)C=C4)=CC=C3	0.8	19.0883	331.993	7.77342	1.16755	2.45559
583	O=S(C1=CC=CC(S(=O)(O)=O)=C1)(C2=CC=C(OC3=CC=C(O)C=C3)C(S(=O)(O)=O)=C2)=O	O=C(C1=CC=CC=C1)C2=CC=C(C(C3=CC=CC=C3)=O)C=C2	0.6	20.3762	296.623	8.29897	0.898185	2.45526
2667	OC(C=C1)=CC=C1P(C(C=C2)=CC=C2OC(C(S(=O)(O)=O)=C3)=CC=C3C(C4=CC=CC(C(C5=CC=CC(S(=O)(O)=O)=C5)=O)=C4)=O)(C6=CC=CC=C6)=O	FC1=C(O)C(F)=C(F)C(C2=C(F)C(F)=C(OC3=CC=C(C4=CC=C(O)C=C4)C=C3)C(F)=C2F)=C1F	0.9	18.7637	303.175	7.64349	1.0732	2.45485
1443	O=C(C1=CC=C(OC2=CC=C(P(C3=CC=C(O)C=C3)(C4=CC=CC=C4)=O)C=C2)C(S(=O)(O)=O)=C1)C5=CC(S(=O)(O)=O)=CC=C5	O=CC(C=C1)=CC=C1OC(C=C2)=CC=C2C(NC3=CC=C(OC4=CC=C(C(C5=CC=C(OC6=CC=C(N)C=C6)C=C5)(C(F)(F)F)C(F)(F)F)C=C4)C=C3)=O	0.8	19.1442	334.309	7.7993	1.26477	2.45461
586	O=S(C1=CC=CC(S(=O)(O)=O)=C1)(C2=CC=C(OC3=CC=C(O)C=C3)C(S(=O)(O)=O)=C2)=O	O=C(C1=CC(C(C2=CC=CC=C2)=O)=CC=C1)C(C=C3)=CC=C3OC4=CC=C(O)C=C4	0.6	19.7001	324.36	8.0259	0.859245	2.45457
1455	OC(C=C1)=CC=C1P(C(C=C2)=CC=C2OC(C(S(=O)(O)=O)=C3)=CC=C3C(C4=CC=CC(C(C5=CC=CC(S(=O)(O)=O)=C5)=O)=C4)=O)(C6=CC=CC=C6)=O	O=S(C1=CC=C(O)C=C1)(C2=CC=C(OC3=CC=C(C(C4=CC=CC=C4)=O)C=C3)C=C2)=O	0.8	17.5946	302.463	7.16833	1.05309	2.45449
3402	OC1=CC=CC(OC2=CC=C(C=CC=C3)C3=C2)=C1C(C4=C(S(=O)(O)=O)C=CC=C4)=O	CCCCCCN(C1=O)C(C2=CC=CC(C2=C1C=C3)=C3C4=C5C(C6=CC=C5)=C(C(NC6=O)=O)C=C4)=O	0.9	20.1434	303.744	8.20725	1.16356	2.45434
232	O=S(C1=CC(C2=NC3=C(C=C(N=CS4)C4=C3)S2)=CC5=C(S(=O)(O)=O)C=CC=C51)(O)=O	O=C(C1=CC=C(C(C2=CC=C(OC3=CC=C(O)C(C(C)(C)C)=C3)C=C2)=O)C=C1)C4=CC=CC=C4	0.5	18.5688	295.507	7.56713	1.26848	2.45387
1467	OC(C=C1)=CC=C1P(C(C=C2)=CC=C2OC(C(S(=O)(O)=O)=C3)=CC=C3C(C4=CC=CC(C(C5=CC=CC(S(=O)(O)=O)=C5)=O)=C4)=O)(C6=CC=CC=C6)=O	O=S(C1=CC=C(OC2=CC=CC=C2C3=CC=C(F)C=C3)C=C1)(C4=CC=C(O)C=C4)=O	0.8	17.6514	297.215	7.19838	1.10883	2.45213
1229	O=C(C1=CC=C(OC2=CC=CC=C2)C=C1)C3=CC(C4=C(C=CC=C4)OCCCS(=O)(O)=O)=C(C=C3)OCCCS(=O)(O)=O	O=S(C1=CC=CC=C1)(C2=CC=C(C=C2)OC3=CC=C(C=C3)C(C4=CC=CC=C4)(C5=CC=CC=C5)C6=CC=C(C=C6)O)=O	0.8	18.1717	277.859	7.41116	1.202	2.45193
1778	OC1=CC=CC(OC2=CC=C(C=CC=C3)C3=C2)=C1C(C4=C(S(=O)(O)=O)C=CC=C4)=O	O=C(NC1=O)C2=CC=C3C4=C2C1=CC=C4C(N(C5=CC6=C(NC7=C6C=C(C)C=C7)C=C5)C3=O)=O	0.8	19.4492	284.592	7.93541	1.08367	2.45093
1606	SC(C=C1)=CC=C1SC(C=C2)=CC=C2SC(C(S(=O)(O)=O)=C3)=CC=C3S(C4=CC(S(=O)(O)=O)=CC=C4)(=O)=O	SC(C=C1)=CC=C1SC(C=C2)=CC=C2SC3=C(C#N)C=CC=C3	0.8	18.403	349.073	7.50974	1.14128	2.45055
1431	O=C(C1=CC=C(OC2=CC=C(P(C3=CC=C(O)C=C3)(C4=CC=CC=C4)=O)C=C2)C(S(=O)(O)=O)=C1)C5=CC(S(=O)(O)=O)=CC=C5	N=P(OC1=CC=C(F)C=C1)OC2=CC=C(OC)C=C2	0.8	19.4252	351.364	7.92856	1.13492	2.45002
214	O=S(C1=CC=CC(S(=O)(O)=O)=C1)(C2=CC=C(OC3=CC=C(C=CC(O)=C4)C4=C3)C(S(=O)(O)=O)=C2)=O	O=C(C1=CC=CC=C1)C2=CC=C(C(C3=CC=CC=C3)=O)C=C2	0.5	18.6578	287.697	7.62142	1.00425	2.44808
1674	O=C(C1=CC=C(OC2=CC=C(S(=O)(O)=O)C=C2)C=C1)C3=CC=CC=C3	CC(C)(C1=CC=C(OCC2=CN(CC3=CC=CC=C3)N=N2)C=C1)C4=CC=C(C=C4)OCC5=CNN=N5	0.8	17.809	274.098	7.27553	1.38385	2.4478
109	OC1=C(S(=O)(O)=O)C=C(C=C(S(=O)(O)=O)C(OC2=CC=CC=C2C#N)=C3)C3=C1	O=C(C1=CC=C(C=C1)F)C2=CC=C(C=C2)OC3=CC=C(C=C3)C(C)(C4=CC=C(C=C4)O)C	0.4	17.8387	305.071	7.28871	1.30954	2.44745
693	O=C(C(C=C1)=C2C3=C1C(N(C(C3=CC=C24)=O)C(C=C5)=CC(S(=O)(O)=O)=C5OC6=C(S(=O)(O)=O)C=CC=C6)=O)NC4=O	OC(C=C1)=CC=C1P(C(C=C2)=CC=C2OC(C=C3)=CC=C3C(C4=CC=CC(C(C5=CC=CC=C5)=O)=C4)=O)(C6=CC=CC=C6)=O	0.7	17.5726	283.958	7.18454	1.12143	2.44589
3371	OC1=CC=CC(OC2=CC=C(C=CC=C3)C3=C2)=C1C(C4=C(S(=O)(O)=O)C=CC=C4)=O	O=C(C1=CC=CC(C(C2=CC=C(OC3=CC=C(C(C)(C)C4=CC=C(O)C=C4)C=C3)C=C2)=O)=C1)C5=CC=CC=C5	0.9	19.4302	316.858	7.9447	1.1756	2.44568
1796	OC1=CC=CC(OC2=CC=C(C=CC=C3)C3=C2)=C1C(C4=C(S(=O)(O)=O)C=CC=C4)=O	OC1=CC=C(S(=O)(C2=CC=C(OC3=CC=C(S(C4=CC=CC=C4)(=O)=O)C=C3)C=C2)=O)C=C1	0.8	19.4712	308.883	7.96895	1.09601	2.44339
744	O=C(C1=CC=C(OC2=CC=CC=C2)C=C1)C3=CC(C4=C(C=CC=C4)OCCCS(=O)(O)=O)=C(C=C3)OCCCS(=O)(O)=O	OC1=CC=C(S(C2=CC=C(OC3=CC=C(C4=CC=CC=C4)C=C3)C=C2)(=O)=O)C=C1	0.7	18.4824	284.055	7.56499	1.30204	2.44316
994	O=C(NC1=O)C2=CC=C3C4=C2C1=CC=C4C(N(C5=CC=C(OC6=CC(C=C(OC7=CC=CC=C7)C(S(=O)(O)=O)=C8)=C8C=C6S(=O)(O)=O)C=C5)C3=O)=O	O=S(C1=CC=CC=C1)(C2=CC=C(OC3=CC=C(S(=O)(C4=CC=CC=C4)=O)C=C3)C=C2)=O	0.7	17.5217	293.416	7.17445	1.04387	2.44224
1067	O=S(C1=CC=CC(S(=O)(O)=O)=C1)(C2=CC=C(OC3=CC=C(O)C(C4=CC=CC=C4)=C3)C(S(=O)(O)=O)=C2)=O	O=C(C1=C2C(C=CC=C23)=CC=C1)N(C4=CC=CC(C(C5=CC=CC=C5)=O)=C4)C3=O	0.7	18.4307	284.086	7.54795	0.903563	2.44182
1384	O=C(C1=CC=C(OC2=CC=C(P(C3=CC=C(O)C=C3)(C4=CC=CC=C4)=O)C=C2)C(S(=O)(O)=O)=C1)C5=CC(S(=O)(O)=O)=CC=C5	O=C(C1=CC=C(CCC)C=C1)C2=CC=CC=C2	0.8	19.7499	349.58	8.08897	1.11385	2.44159
806	O=C(C1=CC=C(OC2=CC=C(P(C3=CC=C(O)C=C3)(C4=CC=CC=C4)=O)C=C2)C(S(=O)(O)=O)=C1)C5=CC(S(=O)(O)=O)=CC=C5	O=C(C1=CC=CC=C1)C2=CC=C(C(C3=CC=CC=C3)=O)C=C2	0.7	17.9835	331.79	7.3714	1.09854	2.43964
1866	O=S(C1=CC=CC(C2=CC=CC(S(=O)(O)=O)=C2)=C1)(O)=O	SC1=CC(C=C2)=C(C=C1)C=C2SC3=C(C#N)C=CC=C3	0.8	18.4777	271.559	7.57621	1.2573	2.43891
736	O=C(C1=CC=C(OC2=CC=CC=C2)C=C1)C3=CC(C4=C(C=CC=C4)OCCCS(=O)(O)=O)=C(C=C3)OCCCS(=O)(O)=O	OC1=CC=CC(OC2=CC=C(C=CC=C3)C3=C2)=C1C#N	0.7	18.4706	272.127	7.57397	1.40551	2.43869
1605	SC(C=C1)=CC=C1SC(C=C2)=CC=C2SC(C(S(=O)(O)=O)=C3)=CC=C3S(C4=CC(S(=O)(O)=O)=CC=C4)(=O)=O	SC1=CC(C=C2)=C(C=C1)C=C2SC3=C(C#N)C=CC=C3	0.8	18.3992	347.982	7.54507	1.1441	2.43857
3359	OC1=CC=CC(OC2=CC=C(C=CC=C3)C3=C2)=C1C(C4=C(S(=O)(O)=O)C=CC=C4)=O	O=C(NC1=O)C2=CC=C3C4=C2C1=CC=C4C(N(CCCCCCCCCC)C3=O)=O	0.9	20.1672	306.831	8.27069	1.13469	2.43839
593	O=S(C1=CC=CC(S(=O)(O)=O)=C1)(C2=CC=C(OC3=CC=C(C4=CC=C(O)C=C4)C=C3)C(S(=O)(O)=O)=C2)=O	O=C(C1=CC(C(C2=CC=CC=C2)=O)=CC=C1)C(C=C3)=CC=C3OC4=CC=C(C5=CC=C(O)C=C5)C=C4	0.6	17.8695	336.917	7.33076	1.05446	2.43761
1717	O=C(NC1=O)C2=CC=C3C4=C2C1=CC=C4C(N(C5=CC=C(OC6=CC(C=C(OC7=CC=CC=C7)C(S(=O)(O)=O)=C8)=C8C=C6S(=O)(O)=O)C=C5)C3=O)=O	O=C(N1)C2=C(C(C1=O)=CC=C3C4=O)C3=C(C(N4C5=CC=C(OC6=CC=C(C7=CC=C(OC8=CC=CC=C8)C=C7)C=C6)C=C5)=O)C=C2	0.8	19.2558	291.126	7.90207	1.20365	2.43681
1335	O=C(C1=CC=C(OC2=CC=C(P(C3=CC=C(O)C=C3)(C4=CC=CC=C4)=O)C=C2)C(S(=O)(O)=O)=C1)C5=CC(S(=O)(O)=O)=CC=C5	OC(C=C1)=CC=C1P(C(C=C2)=CC=C2OC(C=C3)=CC=C3C(C4=CC=CC(C(C5=CC=CC=C5)=O)=C4)=O)(C6=CC=CC=C6)=O	0.8	18.2641	365.377	7.49534	1.05612	2.43673
1110	O=S(C1=CC(S(=O)(O)=O)=C(OC2=CC=CC=C2C3=CC=C(F)C=C3)C=C1)(C4=CC=C(O)C(S(=O)(O)=O)=C4)=O	O=C(C1=C2C(C=CC=C23)=CC=C1)N(C4=CC=CC(C(C5=CC=CC=C5)=O)=C4)C3=O	0.7	17.938	297.071	7.36406	0.880049	2.43588
3274	OC1=CC=CC(OC2=CC=C(C=CC=C3)C3=C2)=C1C(C4=C(S(=O)(O)=O)C=CC=C4)=O	OC1=CC=C(C2(C3=CC=CC=C3C4=CC=CC=C42)C5=CC=C(OC6=CC=C(P(C7=CC=CC=C7)(C8=CC=CC=C8)=O)C=C6)C=C5)C=C1	0.9	18.0801	315.434	7.42426	1.15925	2.43528
101	O=S(C1=CC=CC(S(=O)(O)=O)=C1)(C2=CC=C(OC3=CC=C(O)C=C3)C(S(=O)(O)=O)=C2)=O	O=C(C1=CC(C2=C(OC)C=CC=C2)=C(OC)C=C1)C(C=C3)=CC=C3OC4=CC=C(C(O)=O)C=C4	0.4	18.5157	298.991	7.60404	1.28817	2.43499
1490	O=S(C1=CC=CC=C1)(C2=CC=C(OC3=CC(C4=CC=CC(OC5=CC=C(C(C6=CC(S(=O)(O)=O)=C(F)C=C6)=O)C=C5S(=O)(O)=O)=C4)=C(O)C=C3)C=C2)=O	O=C(C1=CC(C2=C(OC)C=CC=C2)=C(OC)C=C1)C(C=C3)=CC=C3OC4=CC=C(C(O)=O)C=C4	0.8	17.5274	300.046	7.2045	0.781393	2.43285
52	FC1=CC=C(C=C1S(=O)(O)=O)S(C2=CC=C(C(S(=O)(O)=O)=C2)OC3=C(C=C(C=C3)C(C4=CC(S(=O)(O)=O)=C(C=C4)OC5=CC=C(C=C5S(=O)(O)=O)S(C6=CC=C(C(S(=O)(O)=O)=C6)F)(=O)=O)=O)S(=O)(O)=O)(=O)=O	O=C(C1=CC=C(C2=CC=C(OC3=CC=CC=C3)C=C2)C=C1)C4=CC=CC=C4	0.4	17.7131	323.312	7.28127	0.74387	2.4327
389	O=C(C1=CC=C(OC2=CC=CC=C2)C=C1)C3=CC(C4=C(C=CC=C4)OCCCS(=O)(O)=O)=C(C=C3)OCCCS(=O)(O)=O	O=S(C1=CC=C(O)C=C1)(C2=CC=C(OC3=CC=C(C(C4=CC=CC=C4)=O)C=C3)C=C2)=O	0.6	18.1368	283.86	7.46253	1.27897	2.43039
272	O=S(C1=CC=CC(S(=O)(O)=O)=C1)(C2=CC=C(OC3=CC=C(C4=CC=C(O)C=C4)C=C3)C(S(=O)(O)=O)=C2)=O	OC1=CC=C(C(C2=CC=C(OC3=CC=C(C(C4=CC=CC=C4)=O)C=C3)C=C2)=O)C=C1	0.5	19.0682	332.67	7.846	1.13199	2.43031
112	OC1=C(S(=O)(O)=O)C=C(C=C(S(=O)(O)=O)C(OC2=CC=CC=C2C#N)=C3)C3=C1	O=S(C1=CC=C(O)C=C1)(C2=CC=C(OC3=CC=C(C(C4=CC=CC=C4)=O)C=C3)C=C2)=O	0.4	18.2857	313.754	7.52662	1.12079	2.42947
1377	O=C(C1=CC=C(OC2=CC=C(P(C3=CC=C(O)C=C3)(C4=CC=CC=C4)=O)C=C2)C(S(=O)(O)=O)=C1)C5=CC(S(=O)(O)=O)=CC=C5	O=C(C1=CC(C2=C(OC)C=CC=C2)=C(OC)C=C1)C(C=C3)=CC=C3OC4=CC=C(C(O)=O)C=C4	0.8	19.4416	340.952	8.00527	1.19147	2.4286
1000	O=C(NC1=O)C2=CC=C3C4=C2C1=CC=C4C(N(C5=CC=C(OC6=CC(C=C(OC7=CC=CC=C7)C(S(=O)(O)=O)=C8)=C8C=C6S(=O)(O)=O)C=C5)C3=O)=O	O=C(C1=CC=CC(C=O)=C1)NC(C=C2)=CC=C2OC3=C(C#N)C(OC4=CC=C(N)C=C4)=CC=C3	0.7	17.8966	290.149	7.37302	1.21946	2.4273
1768	OC1=CC=CC(OC2=CC=C(C=CC=C3)C3=C2)=C1C(C4=C(S(=O)(O)=O)C=CC=C4)=O	O=C(C1=CC=C(OC2=CC=C(C(C3=CC=CC=C3C(O)=O)C4=CC=C(O)C=C4)C=C2)C=C1)C5=CC=CC=C5	0.8	18.0159	317.371	7.42509	1.20308	2.42635
2566	O=C(C1=CC=C(OC2=CC=C(P(C3=CC=C(O)C=C3)(C4=CC=CC=C4)=O)C=C2)C(S(=O)(O)=O)=C1)C5=CC(S(=O)(O)=O)=CC=C5	OC(C=C1)=CC=C1C2=CC=C(OC3=CC(N=C4C5=CC=CC=C5)=C(C=C3)N=C4C6=CC=C(OC7=NC8=C(N=C7C9=CC=CC=C9)C=CC=C8)C=C6)C=C2	0.9	19.6805	340.17	8.11607	1.13218	2.42488
2551	O=C(C1=CC=C(OC2=CC=C(P(C3=CC=C(O)C=C3)(C4=CC=CC=C4)=O)C=C2)C(S(=O)(O)=O)=C1)C5=CC(S(=O)(O)=O)=CC=C5	O=C(C1=CC=CC2=C1C3=CC=C2)N(NC4=CC=C(CC5=CC=C(NN(C6=O)C(C7=C(C6=CC=C8)C8=CC=C7)=O)C=C5)C=C4)C3=O	0.9	19.5295	321.486	8.05797	1.0076	2.42363
3386	OC1=CC=CC(OC2=CC=C(C=CC=C3)C3=C2)=C1C(C4=C(S(=O)(O)=O)C=CC=C4)=O	O=C(C1=C2C=CC=C1)NC2(C3=CC=C(O)C=C3)C(C=C4)=CC=C4OC5=CC=C(C6=CC=C(C7=CC=C(C8=CC=CC(C(F)(F)F)=C8)C=C7)C=C6)C=C5C(F)(F)F	0.9	17.979	314.758	7.41927	1.45909	2.42328
1744	OC1=CC=CC(OC2=CC=C(C=CC=C3)C3=C2)=C1C(C4=C(S(=O)(O)=O)C=CC=C4)=O	O=P(C1=CC=C(OC2=CC=C(C3=NNC(C4=C3C=CC=C4)=O)C=C2)C=C1)(C5=CC=CC=C5)C6=CC=CC=C6	0.8	17.6726	315.782	7.29821	1.17171	2.42149
3333	OC1=CC=CC(OC2=CC=C(C=CC=C3)C3=C2)=C1C(C4=C(S(=O)(O)=O)C=CC=C4)=O	O=C(NC1=O)C2=CC=C3C4=C2C1=CC=C4C(N(C5=CC(C6=NC(C7=CC=CC=C7)=NN6)=CC=C5)C3=O)=O	0.9	19.617	295.786	8.10283	1.16791	2.42101
572	O=S(C1=CC=CC(S(=O)(O)=O)=C1)(C2=CC=C(OC3=CC=C(O)C(C4=CC=CC=C4)=C3)C(S(=O)(O)=O)=C2)=O	O=C(C1=CC=CC(C=O)=C1)NC(C=C2)=CC=C2OC3=C(C#N)C(OC4=CC=C(N)C=C4)=CC=C3	0.6	18.2498	287.48	7.54008	1.10941	2.42037
625	O=S(C1=CC=C(O)C(S(=O)(O)=O)=C1)(C2=CC(S(=O)(O)=O)=C(OC3=CC=C(C=C(O)C=C4)C4=C3)C=C2)=O	O=C(C1=CC=CC=C1)C2=CC=C(C(C3=CC=CC=C3)=O)C=C2	0.6	18.481	311.363	7.63567	0.931156	2.42035
1452	OC(C=C1)=CC=C1P(C(C=C2)=CC=C2OC(C(S(=O)(O)=O)=C3)=CC=C3C(C4=CC=CC(C(C5=CC=CC(S(=O)(O)=O)=C5)=O)=C4)=O)(C6=CC=CC=C6)=O	O=C(C1=CC=C(C=C1)F)C2=CC=C(C=C2)OC3=CC=C(C=C3)C(C)(C4=CC=C(C=C4)O)C	0.8	17.647	298.649	7.29194	1.20666	2.42007
1242	O=C(C1=CC=C(OC2=CC=CC=C2)C=C1)C3=CC(C4=C(C=CC=C4)OCCCS(=O)(O)=O)=C(C=C3)OCCCS(=O)(O)=O	O=P(C1=CC=C(OC2=CC=C(O)C=C2)C=C1)(C3=CC=CC=C3)C4=CC=CC=C4	0.8	19.4547	283.583	8.03997	1.25627	2.41975
2490	O=C(C1=CC=C(OC2=CC=C(P(C3=CC=C(O)C=C3)(C4=CC=CC=C4)=O)C=C2)C(S(=O)(O)=O)=C1)C5=CC(S(=O)(O)=O)=CC=C5	O=P(C1=CC=C(SC2=CC=C(SC3=CC=C(S)C=C3)C=C2)C=C1)(C4=CC=CC=C4)C5=CC=CC=C5	0.9	19.538	351.138	8.07625	1.07486	2.41919
601	OC1=C(S(=O)(O)=O)C=C(C=C(S(=O)(O)=O)C(OC2=CC=CC=C2C#N)=C3)C3=C1	O=C(C1=CC=CC(C=O)=C1)NC(C=C2)=CC=C2OC3=C(C#N)C(OC4=CC=C(N)C=C4)=CC=C3	0.6	19.5155	269.545	8.06791	1.28931	2.41891
3276	OC1=CC=CC(OC2=CC=C(C=CC=C3)C3=C2)=C1C(C4=C(S(=O)(O)=O)C=CC=C4)=O	O=C(C1=CC=C(C2=C(C=CC=C34)C3=C(C(N(C4=N5)C6=C5C=CC(OC7=CC=C(C8=CC=C(O)C=C8)C=C7)=C6)=O)C=C2)C9=C1C%10=CC=C9)N%11C%10=NC%12=C%11C=CC=C%12	0.9	17.8425	307.582	7.37649	1.33017	2.41883
3321	OC1=CC=CC(OC2=CC=C(C=CC=C3)C3=C2)=C1C(C4=C(S(=O)(O)=O)C=CC=C4)=O	O=C(N1)C2=C(C(C1=O)=CC=C3C4=O)C3=C(C(N4C5=CC=C(OC6=CC=C(C7=CC=C(OC8=C(C(F)(F)F)C=CC=C8)C=C7)C=C6)C(C(F)(F)F)=C5)=O)C=C2	0.9	18.1952	303.593	7.52671	1.27923	2.41741
990	O=S(C1=CC=CC(S(=O)(O)=O)=C1)(C2=CC=C(OC3=CC=C(C(C(F)(F)F)(C(F)(F)F)C4=CC=C(O)C=C4)C=C3)C(S(=O)(O)=O)=C2)=O	OC(C=C1)=CC=C1C(C(F)(F)F)(C(F)(F)F)C(C=C2)=CC=C2OC(C=C3)=CC=C3C4=NC5=CC(C(C6=CC(N=C(C7=CC=CC=C7)O8)=C8C=C6)(C(F)(F)F)C(F)(F)F)=CC=C5O4	0.7	19.6635	330.188	8.13825	1.31963	2.41618
1396	O=C(C1=CC=C(OC2=CC=C(P(C3=CC=C(O)C=C3)(C4=CC=CC=C4)=O)C=C2)C(S(=O)(O)=O)=C1)C5=CC(S(=O)(O)=O)=CC=C5	O=P(C1=CC=C(OC2=CC=C(O)C=C2)C=C1)(C3=CC=CC=C3)C4=CC=CC=C4	0.8	19.1862	366.613	7.94113	1.04707	2.41605
413	O=C(C1=CC=C(OC2=CC=C(P(C3=CC=C(O)C=C3)(C4=CC=CC=C4)=O)C=C2)C(S(=O)(O)=O)=C1)C5=CC(S(=O)(O)=O)=CC=C5	O=C(C1=CC=C(OC2=CC=C(C(C3=CC=CC=C3C(O)=O)C4=CC=C(O)C=C4)C=C2)C=C1)C5=CC=CC=C5	0.6	18.2437	352.015	7.55279	1.16227	2.41549
281	O=C(C1=CC=C(OCCCS(=O)(O)=O)C=C1)C2=CC=C(C(C3=CC=C(OCCCS(=O)(O)=O)C=C3)=O)C=C2	OC1=CC=C(S(C2=CC=C(OC3=CC=C(C4=CC=CC=C4)C=C3)C=C2)(=O)=O)C=C1	0.5	18.4138	292.661	7.62412	1.15994	2.4152
3275	OC1=CC=CC(OC2=CC=C(C=CC=C3)C3=C2)=C1C(C4=C(S(=O)(O)=O)C=CC=C4)=O	O=C(C1=C(C2=CC=C3C4=NC5=C(N46)C=C(OC7=CC=C(C8=CC=C(O)C=C8)C=C7)C=C5)C3=C(C6=O)C=C1)N9C2=NC%10=C9C=CC=C%10	0.9	17.879	303.046	7.40641	1.16498	2.41398
419	O=S(C1=CC=CC(S(=O)(O)=O)=C1)(C2=CC=C(OC3=CC=C(C=CC(O)=C4)C4=C3)C(S(=O)(O)=O)=C2)=O	O=C(C1=CC=CC=C1)C2=CC=C(C(C3=CC=CC=C3)=O)C=C2	0.6	19.0562	311.376	7.90029	0.877495	2.41209
1093	OC1=C(S(=O)(O)=O)C=C(C=C(S(=O)(O)=O)C(OC2=CC=CC=C2C#N)=C3)C3=C1	OC(C=C1)=CC=C1P(C(C=C2)=CC=C2OC(C=C3)=CC=C3C(C4=CC=CC(C(C5=CC=CC=C5)=O)=C4)=O)(C6=CC=CC=C6)=O	0.7	17.8252	299.474	7.39057	1.19	2.41188
2565	O=C(C1=CC=C(OC2=CC=C(P(C3=CC=C(O)C=C3)(C4=CC=CC=C4)=O)C=C2)C(S(=O)(O)=O)=C1)C5=CC(S(=O)(O)=O)=CC=C5	OC(C=C1)=CC=C1C2=CC=C(OC3=CC(N=C4C5=CC=CC=C5)=C(C=C3)N=C4C(C=C6)=CC=C6C7=NC8=C(N=C7C9=CC=CC=C9)C=CC=C8)C=C2	0.9	19.467	339.022	8.08885	1.07845	2.40665
2716	OC(C=C1)=CC=C1P(C(C=C2)=CC=C2OC(C(S(=O)(O)=O)=C3)=CC=C3C(C4=CC=CC(C(C5=CC=CC(S(=O)(O)=O)=C5)=O)=C4)=O)(C6=CC=CC=C6)=O	O=C(C1=CC(C2=C(OC)C=CC=C2)=C(OC)C=C1)C(C=C3)=CC=C3OC4=CC=C(C(O)=O)C=C4	0.9	18.5371	294.862	7.7062	1.15053	2.40548
1504	O=C(C1=CC=C(OC2=CC=C(C(C3=CC=CC=C3C(O)=O)C4=CC=C(O)C=C4)C=C2)C(S(=O)(O)=O)=C1)C5=CC(S(=O)(O)=O)=CC=C5	O=C(NC1=O)C2=C(C1=CC=C3)C3=C(C4=C(C=CC=C5C(N(C6=CC=C(OC7=CC=CC=C7)C=C6)C8=O)=O)C5=C8C=C4)C=C2	0.8	19.0338	268.839	7.91306	1.2362	2.40537
1750	OC1=CC=CC(OC2=CC=C(C=CC=C3)C3=C2)=C1C(C4=C(S(=O)(O)=O)C=CC=C4)=O	OC1=CC=C(C(C(F)(F)F)(C(F)(F)F)C2=CC=C(OC3=CC=C(S(C4=CC=CC=C4)(=O)=O)C=C3)C=C2)C=C1	0.8	18.7355	309.083	7.78988	1.24822	2.40511
357	C=C(C1=CC=C(C(S(=O)(O)=O)=C1)F)C2=CC=C(C(S(=O)(O)=O)=C2)OC3=CC=C(C=C3)C4=CC=C(C=C4)OC5=CC=C(C=C5S(=O)(O)=O)C(C6=CC=C(C(S(=O)(O)=O)=C6)F)=C	OC(C=C1)=CC=C1P(C(C=C2)=CC=C2OC(C=C3)=CC=C3C(C4=CC=CC(C(C5=CC=CC=C5)=O)=C4)=O)(C6=CC=CC=C6)=O	0.6	18.5775	311.592	7.7259	0.916225	2.40457
176	C=C(C1=CC=C(CCCOC2=C(S(=O)(O)=O)C=C(C(C3=CC=C(S(=O)(O)=O)C=C3)(C4=CC=C(S(=O)(O)=O)C=C4)C5=CC=C(S(=O)(O)=O)C=C5)C=C2)C=C1)C6=CC=CC=C6	O=C(C1=CC(C(C2=CC=CC=C2)=O)=CC=C1)C(C=C3)=CC=C3OC4=CC=C(C5=CC=C(O)C=C5)C=C4	0.5	17.5742	295.142	7.30868	1.22405	2.40457
1107	O=S(C1=CC(S(=O)(O)=O)=C(OC2=CC=CC=C2C3=CC=C(F)C=C3)C=C1)(C4=CC=C(O)C(S(=O)(O)=O)=C4)=O	O=C(C1=CC=C(OC2=C(C=CC=C3C(N(C4=CC=CC=C4C)C5=O)=O)C3=C5C=C2)C=C1)C6=CC=CC=C6	0.7	17.908	317.976	7.45453	0.985973	2.4023
3287	OC1=CC=CC(OC2=CC=C(C=CC=C3)C3=C2)=C1C(C4=C(S(=O)(O)=O)C=CC=C4)=O	O=C(C1=C2C(C3=CC=C24)=C(C(NC3=O)=O)C=C1)N(C5=CC=C(C6=NC(C7=CC=CC=C7)=NN6)C=C5)C4=O	0.9	19.4943	295.225	8.11516	1.16603	2.40221
1399	O=C(C1=CC=C(OC2=CC=C(P(C3=CC=C(O)C=C3)(C4=CC=CC=C4)=O)C=C2)C(S(=O)(O)=O)=C1)C5=CC(S(=O)(O)=O)=CC=C5	O=S(C1=CC=CC=C1)(C2=CC=C(OC3=CC=C(O)C=C3)C=C2)=O	0.8	18.8739	358.239	7.85851	0.966758	2.40172
3375	OC1=CC=CC(OC2=CC=C(C=CC=C3)C3=C2)=C1C(C4=C(S(=O)(O)=O)C=CC=C4)=O	OC(C=C1)=CC=C1C(C(F)(F)F)(C(F)(F)F)C(C=C2)=CC=C2OC3=NC4=CC(C(C(F)(F)F)(C(F)(F)F)C5=CC6=C(C=C5)OC(C7=CC=CC=C7)=N6)=CC=C4O3	0.9	17.5546	313.329	7.30955	1.27353	2.4016
1468	OC(C=C1)=CC=C1P(C(C=C2)=CC=C2OC(C(S(=O)(O)=O)=C3)=CC=C3C(C4=CC=CC(C(C5=CC=CC(S(=O)(O)=O)=C5)=O)=C4)=O)(C6=CC=CC=C6)=O	OC1=CC=C(S(=O)(C2=CC=C(OC3=CC=C(S(C4=CC=CC=C4)(=O)=O)C=C3)C=C2)=O)C=C1	0.8	17.7028	293.223	7.37361	1.01656	2.40084
1174	O=S(C1=CC=CC(S(=O)(O)=O)=C1)(C2=CC(S(=O)(O)=O)=C(SC3=CC(C=CC(S)=C4)=C4C=C3)C=C2)=O	SC1=CC=C(SC2=CC=C(SC3=CC=C(S(C4=CC=CC=C4)(=O)=O)C=C3)C=C2)C=C1	0.7	17.8867	356.746	7.45818	1.11581	2.39827
1426	O=C(C1=CC=C(OC2=CC=C(P(C3=CC=C(O)C=C3)(C4=CC=CC=C4)=O)C=C2)C(S(=O)(O)=O)=C1)C5=CC(S(=O)(O)=O)=CC=C5	O=C(C1=CC(C(C2=CC=CC=C2)=O)=CC=C1)C(C=C3)=CC=C3OC4=CC=C(C5=CC=C(O)C=C5)C=C4	0.8	18.8723	351.826	7.87498	1.06308	2.39649
1344	O=C(C1=CC=C(OC2=CC=C(P(C3=CC=C(O)C=C3)(C4=CC=CC=C4)=O)C=C2)C(S(=O)(O)=O)=C1)C5=CC(S(=O)(O)=O)=CC=C5	O=S(C1=CC=CC=C1)(C2=CC=C(OC3=CC=C(C=CC(O)=C4)C4=C3)C=C2)=O	0.8	18.6978	353.844	7.80341	0.958276	2.39611
1248	O=C(C1=CC=C(OC2=CC=CC=C2)C=C1)C3=CC(C4=C(C=CC=C4)OCCCS(=O)(O)=O)=C(C=C3)OCCCS(=O)(O)=O	OC(C=C1)=CC=C1C2(C3=CC=C(OC4=CC=CC=C4C#N)C=C3)C5=C(C=CC=C5)C6=CC=CC=C26	0.8	18.9737	281.349	7.9199	1.31198	2.3957
3254	OC1=CC=CC(OC2=CC=C(C=CC=C3)C3=C2)=C1C(C4=C(S(=O)(O)=O)C=CC=C4)=O	O=S(C(C=C1)=CC=C1OC2=CC=C(C3=CC(C4=CC=CC=C4)=CC=C3)C=C2)(C5=CC=C(OC6=CC=C(C7=CC=CC(C8=CC=C(O)C=C8)=C7)C=C6)C=C5)=O	0.9	17.8996	312.686	7.4732	1.21839	2.39518
3357	OC1=CC=CC(OC2=CC=C(C=CC=C3)C3=C2)=C1C(C4=C(S(=O)(O)=O)C=CC=C4)=O	O=C(NC1=O)C2=CC=C3C4=C2C1=CC=C4C(N(C5=CC=C(C(C6=CC=CC=C67)(C8=CC=CC=C8)C9=C7C=CC=C9)C=C5)C3=O)=O	0.9	18.1069	304.802	7.56125	1.14728	2.39469
622	O=S(C1=CC=C(O)C(S(=O)(O)=O)=C1)(C2=CC(S(=O)(O)=O)=C(OC3=CC=C(OC4=CC=C(O)C=C4)C=C3)C=C2)=O	OC(C=C1)=CC=C1P(C(C=C2)=CC=C2OC(C=C3)=CC=C3C(C4=CC=CC(C(C5=CC=CC=C5)=O)=C4)=O)(C6=CC=CC=C6)=O	0.6	17.7079	333.378	7.39665	1.11579	2.39405
1770	OC1=CC=CC(OC2=CC=C(C=CC=C3)C3=C2)=C1C(C4=C(S(=O)(O)=O)C=CC=C4)=O	O=S(C1=CC=CC=C1)(C2=CC=C(OC3=CC=C(S(=O)(C4=CC=CC=C4)=O)C=C3)C=C2)=O	0.8	19.2866	308.51	8.06211	1.10251	2.39226
58	O=S(C1=CC=CC=C1)(O)=O	OC(C=C1)=CC=C1C(C)(C)C(C=C2)=CC=C2OC3=CC=C(C(C4=CC=CC=C4)=O)C=C3	0.4	17.6608	314.374	7.38471	1.26567	2.39154
3248	OC1=CC=CC(OC2=CC=C(C=CC=C3)C3=C2)=C1C(C4=C(S(=O)(O)=O)C=CC=C4)=O	C=S(C(C=C1)=CC=C1OC2=CC3=CC=CC=C3C=C2)(C4=CC=C(OC5=CC=C(C=CC(O)=C6)C6=C5)C=C4)=C	0.9	19.7766	316.5	8.27054	1.14925	2.39121
2552	O=C(C1=CC=C(OC2=CC=C(P(C3=CC=C(O)C=C3)(C4=CC=CC=C4)=O)C=C2)C(S(=O)(O)=O)=C1)C5=CC(S(=O)(O)=O)=CC=C5	O=C(C1=CC=CC2=C1C3=CC=C2)N(NCCCCCCNN(C4=O)C(C5=C(C4=CC=C6)C6=CC=C5)=O)C3=O	0.9	20.0255	302.247	8.37495	1.05333	2.39112
178	C=C(C1=CC=C(C(S(=O)(O)=O)=C1)F)C2=CC=C(C(S(=O)(O)=O)=C2)OC3=CC=C(C=C3)C4=CC=C(C=C4)OC5=CC=C(C=C5S(=O)(O)=O)C(C6=CC=C(C(S(=O)(O)=O)=C6)F)=C	O=C(C1=CC=C(C(C2=CC=C(OC3=CC=C(O)C(C(C)(C)C)=C3)C=C2)=O)C=C1)C4=CC=CC=C4	0.5	17.9659	300.293	7.51373	1.29135	2.39108
269	O=S(C1=CC=CC(S(=O)(O)=O)=C1)(C2=CC=C(OC3=CC=C(O)C=C3)C(S(=O)(O)=O)=C2)=O	O=C(C1=CC(C(C2=CC=CC=C2)=O)=CC=C1)C(C=C3)=CC=C3OC4=CC=C(C5=CC=C(O)C=C5)C=C4	0.5	18.1553	327.645	7.59314	1.13077	2.39101
1252	O=C(C1=CC=C(OC2=CC=CC=C2)C=C1)C3=CC(C4=C(C=CC=C4)OCCCS(=O)(O)=O)=C(C=C3)OCCCS(=O)(O)=O	OC1=CC=C(C2=CC=C(C3=CC=CC=C3C#N)C=C2)C=C1	0.8	18.9682	279.046	7.93553	1.17728	2.39029
3314	OC1=CC=CC(OC2=CC=C(C=CC=C3)C3=C2)=C1C(C4=C(S(=O)(O)=O)C=CC=C4)=O	OC(C=C1)=CC=C1C2=CC=C(OC3=CC(N=C4C5=CC=CC=C5)=C(C=C3)N=C4C(C=C6)=CC=C6C7=NC8=C(N=C7C9=CC=CC=C9)C=CC=C8)C=C2	0.9	17.876	306.447	7.47912	1.22534	2.39012
1346	O=C(C1=CC=C(OC2=CC=C(P(C3=CC=C(O)C=C3)(C4=CC=CC=C4)=O)C=C2)C(S(=O)(O)=O)=C1)C5=CC(S(=O)(O)=O)=CC=C5	OC1=CC=C(OC2=CC=C(OC3=CC=C(S(C4=CC=CC=C4)(=O)=O)C=C3)C=C2)C=C1	0.8	18.4662	358.658	7.72759	1.07119	2.38964
729	O=C(C1=CC=C(OC2=CC=CC=C2)C=C1)C3=CC(C4=C(C=CC=C4)OCCCS(=O)(O)=O)=C(C=C3)OCCCS(=O)(O)=O	O=S(C1=CC=CC=C1)(C2=CC=C(OC3=CC=C(C=CC(O)=C4)C4=C3)C=C2)=O	0.7	18.0527	280.16	7.56147	1.29998	2.38745
810	O=C(C1=CC=C(OC2=CC=C(P(C3=CC=C(O)C=C3)(C4=CC=CC=C4)=O)C=C2)C(S(=O)(O)=O)=C1)C5=CC(S(=O)(O)=O)=CC=C5	O=C(C1=CC=CC=C1)C2=CC=CC=C2	0.7	17.8992	334.255	7.49726	1.08943	2.38743
2738	OC(C=C1)=CC=C1P(C(C=C2)=CC=C2OC(C(S(=O)(O)=O)=C3)=CC=C3C(C4=CC=CC(C(C5=CC=CC(S(=O)(O)=O)=C5)=O)=C4)=O)(C6=CC=CC=C6)=O	OC(C=C1)=CC=C1C2(C3=CC=C(OC4=CC=CC=C4C#N)C=C3)C5=C(C=CC=C5)C6=CC=CC=C26	0.9	18.409	287.09	7.71223	1.11366	2.38698
2735	OC(C=C1)=CC=C1P(C(C=C2)=CC=C2OC(C(S(=O)(O)=O)=C3)=CC=C3C(C4=CC=CC(C(C5=CC=CC(S(=O)(O)=O)=C5)=O)=C4)=O)(C6=CC=CC=C6)=O	OC(C=C1)=CC=C1C(C=C2)=CC=C2OC3=C(C#N)C=CC=C3	0.9	18.4999	302.595	7.75114	1.1033	2.38674
1735	OC1=CC=CC(OC2=CC=C(C=CC=C3)C3=C2)=C1C(C4=C(S(=O)(O)=O)C=CC=C4)=O	C=S(C(C=C1)=CC=C1OC2=CC3=CC=CC=C3C=C2)(C4=CC=C(OC5=CC=C(C=CC(O)=C6)C6=C5)C=C4)=C	0.8	17.7638	322.708	7.45078	1.17261	2.38416
215	O=S(C1=CC=CC(S(=O)(O)=O)=C1)(C2=CC=C(OC3=CC=C(C=CC(O)=C4)C4=C3)C(S(=O)(O)=O)=C2)=O	OC1=CC=C(C(C2=CC=C(OC3=CC=C(C(C4=CC=CC=C4)=O)C=C3)C=C2)=O)C=C1	0.5	19.0382	325.018	7.98545	0.961393	2.38411
277	O=C(C1=CC=C(OCCCS(=O)(O)=O)C=C1)C2=CC=C(C(C3=CC=C(OCCCS(=O)(O)=O)C=C3)=O)C=C2	O=S(C1=CC=C(O)C=C1)(C2=CC=C(OC3=CC=C(C=CC=C4)C4=C3)C=C2)=O	0.5	18.5507	288.578	7.78186	1.14067	2.38384
391	O=C(C1=CC=C(OC2=CC=CC=C2)C=C1)C3=CC(C4=C(C=CC=C4)OCCCS(=O)(O)=O)=C(C=C3)OCCCS(=O)(O)=O	O=S(C1=CC=C(O)C=C1)(C2=CC=C(OC3=CC=C(C=CC=C4)C4=C3)C=C2)=O	0.6	17.8863	285.984	7.5059	1.22142	2.38297
2650	O=C(C1=CC=C(OC2=CC=C(P(C3=CC=C(O)C=C3)(C4=CC=CC=C4)=O)C=C2)C(S(=O)(O)=O)=C1)C5=CC(S(=O)(O)=O)=CC=C5	SC(C=C1)=CC=C1SC(C=C2)=CC=C2SC3=C(C#N)C=CC=C3	0.9	19.8192	343.035	8.31776	1.05909	2.38276
2683	OC(C=C1)=CC=C1P(C(C=C2)=CC=C2OC(C(S(=O)(O)=O)=C3)=CC=C3C(C4=CC=CC(C(C5=CC=CC(S(=O)(O)=O)=C5)=O)=C4)=O)(C6=CC=CC=C6)=O	O=C(C1=CC=C(OC2=CC=C(P(C3=CC=C(O)C=C3)(C4=CC=CC=C4)=O)C=C2)C=C1)C5=CC=CC=C5	0.9	18.3227	314.734	7.69023	1.07136	2.38259
3289	OC1=CC=CC(OC2=CC=C(C=CC=C3)C3=C2)=C1C(C4=C(S(=O)(O)=O)C=CC=C4)=O	OC1=C(F)C(F)=C(C2=C(F)C(F)=C(OC3=CC=C(C(C(F)(F)F)(C(F)(F)F)C4=CC=CC=C4)C=C3)C(F)=C2F)C(F)=C1F	0.9	18.5831	305.428	7.80242	1.27193	2.38171
3411	O=S(C1=CC=CC(C2=CC=CC(S(=O)(O)=O)=C2)=C1)(O)=O	SC(C=C1)=CC=C1SC(C=C2)=CC=C2SC3=C(C#N)C=CC=C3	0.9	18.422	272.695	7.73925	1.17742	2.38033
796	O=C(C1=CC=C(OC2=CC=C(P(C3=CC=C(O)C=C3)(C4=CC=CC=C4)=O)C=C2)C(S(=O)(O)=O)=C1)C5=CC(S(=O)(O)=O)=CC=C5	OC(C=C1)=CC=C1C(C)(C)C(C=C2)=CC=C2OC3=CC=C(C(C4=CC=CC=C4)=O)C=C3	0.7	17.8742	354.765	7.51274	1.09371	2.37918
3784	O=S(C1=CC=CC(S(=O)(O)=O)=C1)(C2=CC(S(=O)(O)=O)=C(SC3=CC(C=CC(S)=C4)=C4C=C3)C=C2)=O	SC(C=C1)=CC=C1SC(C=C2)=CC=C2SC3=C(C#N)C=CC=C3	0.9	17.9077	349.973	7.52907	1.14793	2.37848
591	O=S(C1=CC=CC(S(=O)(O)=O)=C1)(C2=CC=C(OC3=CC=C(C4=CC=C(O)C=C4)C=C3)C(S(=O)(O)=O)=C2)=O	OC1=CC=C(C(C2=CC=C(OC3=CC=C(C(C4=CC=CC=C4)=O)C=C3)C=C2)=O)C=C1	0.6	18.951	335.251	7.96801	1.05205	2.37839
128	O=S(C1=CC=CC(C2=CC=CC(S(=O)(O)=O)=C2)=C1)(O)=O	O=C(C1=CC=CC=C1)C(C=C2)=CC=C2OC(C(C)=C3)=C(C)C=C3C4=CC(C)=C(O)C(C)=C4	0.4	18.3802	310.59	7.72836	1.23855	2.37828
1386	O=C(C1=CC=C(OC2=CC=C(P(C3=CC=C(O)C=C3)(C4=CC=CC=C4)=O)C=C2)C(S(=O)(O)=O)=C1)C5=CC(S(=O)(O)=O)=CC=C5	O=C(NC1=O)C2=CC=C3C4=C2C1=CC=C4C(N(C5=CC=C(OC6=CC=CC=C6)C=C5)C3=O)=O	0.8	19.0766	330.651	8.02495	1.08759	2.37717
993	O=C(NC1=O)C2=CC=C3C4=C2C1=CC=C4C(N(C5=CC=C(OC6=CC(C=C(OC7=CC=CC=C7)C(S(=O)(O)=O)=C8)=C8C=C6S(=O)(O)=O)C=C5)C3=O)=O	O=C1N(C2=CC=CC=C2C(F)(F)F)C(C3=CC=CC4=C3C1=CC=C4)=O	0.7	18.0185	278.467	7.58244	1.39535	2.37635
671	O=S(C1=CC=CC(S(=O)(O)=O)=C1)(C2=CC(S(=O)(O)=O)=C(SC3=CC(C=CC(S)=C4)=C4C=C3)C=C2)=O	O=C(C1=CC(C(C2=CC=CC=C2)=O)=CC=C1)C(C=C3)=CC=C3OC4=CC=C(O)C=C4	0.6	17.9325	326.041	7.54849	1.13678	2.37564
1321	O=C(C1=CC=C(OC2=CC=C(P(C3=CC=C(O)C=C3)(C4=CC=CC=C4)=O)C=C2)C(S(=O)(O)=O)=C1)C5=CC(S(=O)(O)=O)=CC=C5	O=S(C(C=C1)=CC=C1OC(C=C2)=CC=C2C3=CC=C(O)C=C3)(C4=CC=CC=C4)=O	0.8	18.5915	357.343	7.82911	0.984145	2.37466
362	C=C(C1=CC=C(C(S(=O)(O)=O)=C1)F)C2=CC=C(C(S(=O)(O)=O)=C2)OC3=CC=C(C=C3)C4=CC=C(C=C4)OC5=CC=C(C=C5S(=O)(O)=O)C(C6=CC=C(C(S(=O)(O)=O)=C6)F)=C	O=C(C1=CC(C(C2=CC=CC=C2)=O)=CC=C1)C(C=C3)=CC=C3OC4=CC=C(O)C=C4	0.6	18.9318	315.791	7.97435	0.862719	2.37409
390	O=C(C1=CC=C(OC2=CC=CC=C2)C=C1)C3=CC(C4=C(C=CC=C4)OCCCS(=O)(O)=O)=C(C=C3)OCCCS(=O)(O)=O	OC1=CC=CC(OC2=CC=C(C=CC=C3)C3=C2)=C1C#N	0.6	18.0876	278.428	7.61988	1.39533	2.37374
2672	OC(C=C1)=CC=C1P(C(C=C2)=CC=C2OC(C(S(=O)(O)=O)=C3)=CC=C3C(C4=CC=CC(C(C5=CC=CC(S(=O)(O)=O)=C5)=O)=C4)=O)(C6=CC=CC=C6)=O	OC1=CC=C(C2=CC=C(OC3=CC=C(S(=O)(C4=CC=C(OC5=CC=C(C6=CC=C(O)C=C6)C=C5)C=C4)=O)C=C3)C=C2)C=C1	0.9	18.7827	304.826	7.91497	1.13718	2.37307
2649	O=C(C1=CC=C(OC2=CC=C(P(C3=CC=C(O)C=C3)(C4=CC=CC=C4)=O)C=C2)C(S(=O)(O)=O)=C1)C5=CC(S(=O)(O)=O)=CC=C5	SC1=CC(C=C2)=C(C=C1)C=C2SC3=C(C#N)C=CC=C3	0.9	19.6437	340.712	8.28168	1.05072	2.37195
106	O=S(C1=CC=CC(S(=O)(O)=O)=C1)(C2=CC=C(OC3=CC=C(O)C=C3)C(S(=O)(O)=O)=C2)=O	O=C(C1=CC=C(C2=CC=C(OC3=CC=CC=C3)C=C2)C=C1)C4=CC=CC=C4	0.4	17.8103	334.509	7.51072	1.01614	2.37131
632	OC1=CC2=C(C=C(S(=O)(O)=O)C=C2OC3=CC=CC=C3C#N)C=C1	O=C(C1=CC=C(C(C2=CC=C(OC3=CC=C(O)C(C(C)(C)C)=C3)C=C2)=O)C=C1)C4=CC=CC=C4	0.6	17.5064	303.387	7.3829	1.20029	2.37121
312	O=S(C1=CC=C(O)C(S(=O)(O)=O)=C1)(C2=CC(S(=O)(O)=O)=C(OC3=CC=C(C=C(O)C=C4)C4=C3)C=C2)=O	O=C(C1=CC=CC=C1)C2=CC=C(C(C3=CC=CC=C3)=O)C=C2	0.5	18.3928	311.061	7.76113	1.03779	2.36986
1903	OC1=CC=C(S(C2=C(OC3=CC=C(C(C4=CC(S(=O)(O)=O)=CC=C4)=O)C=C3S(=O)(O)=O)C=C(OC5=CC=CC=C5)C=C2)(=O)=O)C=C1	O=C(NC1=O)C2=C(C1=CC=C3)C3=C(C4=C(C=CC=C5C(N(C6=CC=C(N(C7=CC=CC=C7)C8=CC=CC=C8)C=C6)C9=O)=O)C5=C9C=C4)C=C2	0.8	17.6715	271.742	7.46144	0.738677	2.36837
970	O=C(C1=CC=C(OC2=CC=C(S(=O)(O)=O)C=C2)C=C1)C3=CC=CC=C3	OC1=CC=C(S(=O)(C2=CC=C(OC3=CC=C(S(C4=CC=CC=C4)(=O)=O)C=C3)C=C2)=O)C=C1	0.7	18.1288	322.385	7.65823	1.03098	2.36723
737	O=C(C1=CC=C(OC2=CC=CC=C2)C=C1)C3=CC(C4=C(C=CC=C4)OCCCS(=O)(O)=O)=C(C=C3)OCCCS(=O)(O)=O	O=S(C1=CC=C(O)C=C1)(C2=CC=C(OC3=CC=C(C=CC=C4)C4=C3)C=C2)=O	0.7	18.7499	277.408	7.92089	1.29998	2.36715
580	O=S(C1=CC=CC(S(=O)(O)=O)=C1)(C2=CC=C(OC3=CC=C(O)C=C3)C(S(=O)(O)=O)=C2)=O	O=C(C1=CC=C(OC2=C(C=CC=C3C(N(C4=CC=CC=C4C)C5=O)=O)C3=C5C=C2)C=C1)C6=CC=CC=C6	0.6	17.7835	273.82	7.51315	1.04911	2.36698
2714	OC(C=C1)=CC=C1P(C(C=C2)=CC=C2OC(C(S(=O)(O)=O)=C3)=CC=C3C(C4=CC=CC(C(C5=CC=CC(S(=O)(O)=O)=C5)=O)=C4)=O)(C6=CC=CC=C6)=O	SC1=CC=C(SC2=CC=C(SC3=CC=C(S(C4=CC=CC=C4)(=O)=O)C=C3)C=C2)C=C1	0.9	17.7336	296.21	7.49279	1.13088	2.36675
104	O=S(C1=CC=CC(S(=O)(O)=O)=C1)(C2=CC=C(OC3=CC=C(O)C=C3)C(S(=O)(O)=O)=C2)=O	O=C(C1=CC(C(C2=CC=CC=C2)=O)=CC=C1)C(C=C3)=CC=C3OC4=CC=C(C5=CC=C(O)C=C5)C=C4	0.4	17.5031	318.89	7.39659	1.207	2.36637
585	O=S(C1=CC=CC(S(=O)(O)=O)=C1)(C2=CC=C(OC3=CC=C(O)C=C3)C(S(=O)(O)=O)=C2)=O	O=C(C1=CC(C(C2=CC=CC=C2)=O)=CC=C1)C(C=C3)=CC=C3OC4=CC=C(C5=CC=C(O)C=C5)C=C4	0.6	18.3717	328.728	7.76487	1.03037	2.36601
805	O=C(C1=CC=C(OC2=CC=C(P(C3=CC=C(O)C=C3)(C4=CC=CC=C4)=O)C=C2)C(S(=O)(O)=O)=C1)C5=CC(S(=O)(O)=O)=CC=C5	O=C(C1=CC=CC(C=O)=C1)NC(C=C2)=CC=C2OC3=C(C#N)C(OC4=CC=C(N)C=C4)=CC=C3	0.7	17.514	292.148	7.40553	1.2334	2.36499
3385	OC1=CC=CC(OC2=CC=C(C=CC=C3)C3=C2)=C1C(C4=C(S(=O)(O)=O)C=CC=C4)=O	O=C(NC1=O)C2=C(C1=CC=C3C(N(C4=CC=C(OC5=C(C(F)(F)F)C=C(C6=CC=C(C7=CC=C(OC8=CC=CC=C8)C(C(F)(F)F)=C7)S6)C=C5)C=C4)C9=O)=O)C3=C9C=C2	0.9	18.0576	304.636	7.63559	1.48605	2.36493
734	O=C(C1=CC=C(OC2=CC=CC=C2)C=C1)C3=CC(C4=C(C=CC=C4)OCCCS(=O)(O)=O)=C(C=C3)OCCCS(=O)(O)=O	OC(C=C1)=CC=C1C(C)(C)C(C=C2)=CC=C2OC3=CC=C(C(C4=CC=CC=C4)=O)C=C3	0.7	18.5738	280.909	7.85447	1.1844	2.36474
1224	O=C(C1=CC=C(OC2=CC=CC=C2)C=C1)C3=CC(C4=C(C=CC=C4)OCCCS(=O)(O)=O)=C(C=C3)OCCCS(=O)(O)=O	FC1=C(O)C(F)=C(F)C(C2=C(F)C(F)=C(OC3=CC=C(C4=CC=C(O)C=C4)C=C3)C(F)=C2F)=C1F	0.8	19.833	280.433	8.38736	1.22929	2.36463
3255	OC1=CC=CC(OC2=CC=C(C=CC=C3)C3=C2)=C1C(C4=C(S(=O)(O)=O)C=CC=C4)=O	O=S(C1=CC=CC=C1)(C2=CC=C(OC3=CC=C(C(C4=CC=C(OC5=CC=C(S(C6=CC=CC=C6)(=O)=O)C=C5)C=C4)=O)C=C3)C=C2)=O	0.9	18.2546	309.699	7.72297	1.16554	2.36368
1343	O=C(C1=CC=C(OC2=CC=C(P(C3=CC=C(O)C=C3)(C4=CC=CC=C4)=O)C=C2)C(S(=O)(O)=O)=C1)C5=CC(S(=O)(O)=O)=CC=C5	O=S(C1=CC=CC=C1)(C2=CC=C(C=C2)OC3=CC=C(C=C3)C(C4=CC=CC=C4)(C5=CC=CC=C5)C6=CC=C(C=C6)O)=O	0.8	18.6944	364.841	7.90909	0.993229	2.36366
3322	OC1=CC=CC(OC2=CC=C(C=CC=C3)C3=C2)=C1C(C4=C(S(=O)(O)=O)C=CC=C4)=O	O=C(N1)C2=C(C(C1=O)=CC=C3C4=O)C3=C(C(N4C5=CC(C(F)(F)F)=C(OC6=CC=C(OC7=CC=CC=C7C(F)(F)F)C=C6)C=C5)=O)C=C2	0.9	18.2706	302.751	7.73131	1.22589	2.36319
2709	OC(C=C1)=CC=C1P(C(C=C2)=CC=C2OC(C(S(=O)(O)=O)=C3)=CC=C3C(C4=CC=CC(C(C5=CC=CC(S(=O)(O)=O)=C5)=O)=C4)=O)(C6=CC=CC=C6)=O	O=C(C1=CC=C(OC2=CC=C(C(C3=CC=CC=C3C4=NC(C=CC=C5)=C5N4)C6=CC=C(O)C=C6)C=C2)C=C1)C7=CC=CC=C7	0.9	18.4216	292.056	7.79641	1.11185	2.36283
3262	OC1=CC=CC(OC2=CC=C(C=CC=C3)C3=C2)=C1C(C4=C(S(=O)(O)=O)C=CC=C4)=O	O=P(C1=CC=C(OC2=CC=C(C3=NNC(C4=C3C=CC=C4)=O)C=C2)C=C1)(C5=CC=CC=C5)C6=CC=CC=C6	0.9	18.9551	310.905	8.02419	1.14665	2.36225
361	C=C(C1=CC=C(C(S(=O)(O)=O)=C1)F)C2=CC=C(C(S(=O)(O)=O)=C2)OC3=CC=C(C=C3)C4=CC=C(C=C4)OC5=CC=C(C=C5S(=O)(O)=O)C(C6=CC=C(C(S(=O)(O)=O)=C6)F)=C	O=C(C1=CC(C(C2=CC=CC=C2)=O)=CC=C1)C(C=C3)=CC=C3OC4=CC=C(C5=CC=C(O)C=C5)C=C4	0.6	18.9945	314.344	8.04356	0.846741	2.36145
2730	OC(C=C1)=CC=C1P(C(C=C2)=CC=C2OC(C(S(=O)(O)=O)=C3)=CC=C3C(C4=CC=CC(C(C5=CC=CC(S(=O)(O)=O)=C5)=O)=C4)=O)(C6=CC=CC=C6)=O	O=P(C1=CC=C(OC2=CC=C(O)C=C2)C=C1)(C3=CC=CC=C3)C4=CC=CC=C4	0.9	18.457	310.947	7.81662	1.06377	2.36125
2658	O=C(C1=CC=C(OC2=CC=C(P(C3=CC=C(O)C=C3)(C4=CC=CC=C4)=O)C=C2)C(S(=O)(O)=O)=C1)C5=CC(S(=O)(O)=O)=CC=C5	N#CC1=C(C2=CC=C(OC3=CC=CC=C3)C=C2)C=CC=C1	0.9	19.577	343.146	8.2962	1.00904	2.35975
3390	OC1=CC=CC(OC2=CC=C(C=CC=C3)C3=C2)=C1C(C4=C(S(=O)(O)=O)C=CC=C4)=O	FC(C1=CC(C(C=C2)=CC=C2N3N=NC(C4=CC(C5=CNN=N5)=CC=C4)=C3)=CC=C1OC6=C(C(F)(F)F)C=C(C7=CC=CC=C7)C=C6)(F)F	0.9	17.9508	304.266	7.60745	1.33281	2.35964
1256	CC(C)(C1=CC=C(O)C=C1)C(C=C2)=CC=C2OC(C(S(=O)(O)=O)=C3)=CC=C3S(C4=CC(S(=O)(O)=O)=CC=C4)(=O)=O	O=C(NC1=O)C2=C(C1=CC=C3)C3=C(C4=C(C=CC=C5C(N(C6=CC=C(N(C7=CC=CC=C7)C8=CC=CC=C8)C=C6)C9=O)=O)C5=C9C=C4)C=C2	0.8	17.6581	278.398	7.484	0.614216	2.35945
1228	O=C(C1=CC=C(OC2=CC=CC=C2)C=C1)C3=CC(C4=C(C=CC=C4)OCCCS(=O)(O)=O)=C(C=C3)OCCCS(=O)(O)=O	O=P(C1=CC=C(O)C=C1)(C2=CC=CC=C2)C(C=C3)=CC=C3OC(C=C4)=CC=C4S(C5=CC=CC=C5)(=O)=O	0.8	18.4866	266.85	7.8394	1.24497	2.35816
1459	OC(C=C1)=CC=C1P(C(C=C2)=CC=C2OC(C(S(=O)(O)=O)=C3)=CC=C3C(C4=CC=CC(C(C5=CC=CC(S(=O)(O)=O)=C5)=O)=C4)=O)(C6=CC=CC=C6)=O	O=C(C1=CC=C(OC2=CC=C(C(C3=CC=CC=C3C(O)=O)C4=CC=C(O)C=C4)C=C2)C=C1)C5=CC=CC=C5	0.8	17.6667	297.181	7.49414	1.1529	2.3574
2553	O=C(C1=CC=C(OC2=CC=C(P(C3=CC=C(O)C=C3)(C4=CC=CC=C4)=O)C=C2)C(S(=O)(O)=O)=C1)C5=CC(S(=O)(O)=O)=CC=C5	O=C(C1=CC=CC2=C1C3=CC=C2)N(NC4=CC=C(CC5=CC=C(NN(C6=O)C(C7=C(C6=CC=C8)C8=CC=C7)=O)C(C)=C5)C=C4C)C3=O	0.9	19.4477	300.767	8.24988	1.02867	2.35733
1913	OC1=CC=C(S(C2=C(OC3=CC=C(C(C4=CC(S(=O)(O)=O)=CC=C4)=O)C=C3S(=O)(O)=O)C=C(OC5=CC=CC=C5)C=C2)(=O)=O)C=C1	O=C(NC1=O)C2=C(C1=CC=C3)C3=C(C4=C(C=CC=C5C(N(C6=CC=C(OC7=CC=CC=C7)C=C6)C8=O)=O)C5=C8C=C4)C=C2	0.8	17.6341	291.772	7.48253	0.754919	2.35671
3302	OC1=CC=CC(OC2=CC=C(C=CC=C3)C3=C2)=C1C(C4=C(S(=O)(O)=O)C=CC=C4)=O	O=C(C1=CC=CC2=C1C3=CC=C2)N(NCCCCCCNN(C4=O)C(C5=C(C4=CC=C6)C6=CC=C5)=O)C3=O	0.9	19.342	296.84	8.20837	1.20291	2.35637
2550	O=C(C1=CC=C(OC2=CC=C(P(C3=CC=C(O)C=C3)(C4=CC=CC=C4)=O)C=C2)C(S(=O)(O)=O)=C1)C5=CC(S(=O)(O)=O)=CC=C5	O=C(C1=CC=CC2=C1C3=CC=C2)N(NC4=CC=C(OC5=CC=C(NN(C6=O)C(C7=C(C6=CC=C8)C8=CC=C7)=O)C=C5)C=C4)C3=O	0.9	18.841	326.986	7.99944	1.00147	2.3553
1180	O=S(C1=CC(S(=O)(O)=O)=CC=C1)(C2=CC(S(=O)(O)=O)=C(SC3=CC=C(SC4=CC=C(S)C=C4)C=C3)C=C2)=O	SC1=CC=C(SC2=CC=C(SC3=CC=C(S(C4=CC=CC=C4)(=O)=O)C=C3)C=C2)C=C1	0.7	18.1212	354.118	7.69789	1.1243	2.35406
1001	O=C(NC1=O)C2=CC=C3C4=C2C1=CC=C4C(N(C5=CC=C(OC6=CC(C=C(OC7=CC=CC=C7)C(S(=O)(O)=O)=C8)=C8C=C6S(=O)(O)=O)C=C5)C3=O)=O	O=S(C1=CC=C(OC2=CC=CC=C2C3=CC=C(F)C=C3)C=C1)(C4=CC=C(O)C=C4)=O	0.7	17.573	306.651	7.46532	1.11163	2.35394
575	O=S(C1=CC=CC(S(=O)(O)=O)=C1)(C2=CC=C(OC3=CC=C(O)C(C4=CC=CC=C4)=C3)C(S(=O)(O)=O)=C2)=O	O=C(C1=CC(C(C2=CC=CC=C2)=O)=CC=C1)C(C=C3)=CC=C3OC4=CC=C(C5=CC=C(O)C=C5)C=C4	0.6	17.6757	331.15	7.51389	1.06852	2.3524
2577	O=C(C1=CC=C(OC2=CC=C(P(C3=CC=C(O)C=C3)(C4=CC=CC=C4)=O)C=C2)C(S(=O)(O)=O)=C1)C5=CC(S(=O)(O)=O)=CC=C5	O=C(N1)C2=C(C(C1=O)=CC=C3)C3=C(C4=C(C=CC=C5C6=O)C5=C(C(N6C7=CC=C(OC8=CC=C(C9=CC=C(OC%10=CC=CC=C%10)C=C9)C=C8)C=C7)=O)C=C4)C=C2	0.9	18.8792	332.119	8.02654	1.26297	2.35209
2540	O=C(C1=CC=C(OC2=CC=C(P(C3=CC=C(O)C=C3)(C4=CC=CC=C4)=O)C=C2)C(S(=O)(O)=O)=C1)C5=CC(S(=O)(O)=O)=CC=C5	O=S(C1=C(C2=NC3=C(C=C(N=CS4)C4=C3)S2)C=CC=C1)(C5=CC=CC=C5)=O	0.9	19.6979	333.305	8.37967	1.00555	2.35068
188	O=S(C1=CC=CC=C1)(O)=O	O=C(C1=CC=C(C(C2=CC=CC=C2)=O)C=C1)C(C=C3)=CC=C3OC(C(C)=C4)=C(C)C=C4C5=CC(C)=C(O)C(C)=C5	0.5	17.6637	290.207	7.51479	1.29934	2.35052
3382	OC1=CC=CC(OC2=CC=C(C=CC=C3)C3=C2)=C1C(C4=C(S(=O)(O)=O)C=CC=C4)=O	O=C(NC1=O)C2=C(C1=CC=C3C(N(C4=CC=C(OC5=C(C(F)(F)F)C=C(C6=CC=C(C7=CC=C(OC8=CC=CC=C8)C(C(F)(F)F)=C7)C=C6)C=C5)C=C4)C9=O)=O)C3=C9C=C2	0.9	17.9942	305.862	7.66918	1.49175	2.3463
2671	OC(C=C1)=CC=C1P(C(C=C2)=CC=C2OC(C(S(=O)(O)=O)=C3)=CC=C3C(C4=CC=CC(C(C5=CC=CC(S(=O)(O)=O)=C5)=O)=C4)=O)(C6=CC=CC=C6)=O	FC(C(C1=CC=C(C2=NC3=C(C=C(N=CS4)C4=C3)S2)C=C1)(C(F)(F)F)C5=CC=CC=C5)(F)F	0.9	17.7525	276.825	7.56852	1.16534	2.34558
2687	OC(C=C1)=CC=C1P(C(C=C2)=CC=C2OC(C(S(=O)(O)=O)=C3)=CC=C3C(C4=CC=CC(C(C5=CC=CC(S(=O)(O)=O)=C5)=O)=C4)=O)(C6=CC=CC=C6)=O	FC(C(C1=CC=CC=C1)(C(F)(F)F)C2=CC=C(C3=NC4=C(N3)C=C(C5=CC=C(NC=N6)C6=C5)C=C4)C=C2)(F)F	0.9	18.1251	280.854	7.72775	1.13431	2.34546
2530	O=C(C1=CC=C(OC2=CC=C(P(C3=CC=C(O)C=C3)(C4=CC=CC=C4)=O)C=C2)C(S(=O)(O)=O)=C1)C5=CC(S(=O)(O)=O)=CC=C5	O=C(NC1=O)C2=C(C1=CC=C3)C3=C(C4=C(C=CC=C5C(N(C6=CC=C(N(C7=CC=CC=C7)C8=CC=CC=C8)C=C6)C9=O)=O)C5=C9C=C4)C=C2	0.9	19.3859	322.878	8.26599	1.03224	2.34526
3323	OC1=CC=CC(OC2=CC=C(C=CC=C3)C3=C2)=C1C(C4=C(S(=O)(O)=O)C=CC=C4)=O	O=C(N1)C2=C(C(C1=O)=CC=C3C4=O)C3=C(C(N4C5=CC=C(OC6=CC=C(C7=CC=C(OC8=CC=CC=C8)C=C7)C=C6)C=C5)=O)C=C2	0.9	18.1087	305.401	7.72166	1.16758	2.34518
115	OC1=C(S(=O)(O)=O)C=C(C=C(S(=O)(O)=O)C(OC2=CC=CC=C2C#N)=C3)C3=C1	O=C(C1=CC=C(OC2=CC=C(C(C3=CC=CC=C3C(O)=O)C4=CC=C(O)C=C4)C=C2)C=C1)C5=CC=CC=C5	0.4	17.7206	303.479	7.55706	1.32967	2.34491
2693	OC(C=C1)=CC=C1P(C(C=C2)=CC=C2OC(C(S(=O)(O)=O)=C3)=CC=C3C(C4=CC=CC(C(C5=CC=CC(S(=O)(O)=O)=C5)=O)=C4)=O)(C6=CC=CC=C6)=O	O=C(NC1=O)C2=C(C1=CC=C3)C3=C(C4=C(C=CC=C5C(N(C6=CC=C(N(C7=CC=CC=C7)C8=CC=CC=C8)C=C6)C9=O)=O)C5=C9C=C4)C=C2	0.9	17.542	284.95	7.48178	1.10694	2.34462
2740	OC(C=C1)=CC=C1P(C(C=C2)=CC=C2OC(C(S(=O)(O)=O)=C3)=CC=C3C(C4=CC=CC(C(C5=CC=CC(S(=O)(O)=O)=C5)=O)=C4)=O)(C6=CC=CC=C6)=O	O=S(C1=CC=C(OC2=CC=CC=C2C3=CC=C(F)C=C3)C=C1)(C4=CC=C(O)C=C4)=O	0.9	18.3798	300.541	7.83927	1.06085	2.34457
785	O=C(C1=CC=C(OC2=CC=C(P(C3=CC=C(O)C=C3)(C4=CC=CC=C4)=O)C=C2)C(S(=O)(O)=O)=C1)C5=CC(S(=O)(O)=O)=CC=C5	FC1=C(O)C(F)=C(F)C(C2=C(F)C(F)=C(OC3=CC=C(C4=CC=C(O)C=C4)C=C3)C(F)=C2F)=C1F	0.7	18.0664	349.485	7.70592	1.13647	2.34449
2513	O=C(C1=CC=C(OC2=CC=C(P(C3=CC=C(O)C=C3)(C4=CC=CC=C4)=O)C=C2)C(S(=O)(O)=O)=C1)C5=CC(S(=O)(O)=O)=CC=C5	C1(C2=CC3=CC=CC=C3C=C2)=NC4=CC=C(C5=CC=C(NC=N6)C6=C5)C=C4N1	0.9	19.2595	336.859	8.21687	0.979271	2.3439
63	O=S(C1=CC=CC=C1)(O)=O	OC1=CC=C(C(C(C=C2)=CC=C2OC(C=C3)=CC=C3C(CCC(O)=O)(C)C4=CC=CC=C4)=O)C=C1	0.4	17.7108	307.162	7.55737	1.29912	2.34351
1090	O=S(C1=CC=CC(S(=O)(O)=O)=C1)(C2=CC=C(OC3=CC=C(C4=CC=C(O)C=C4)C=C3)C(S(=O)(O)=O)=C2)=O	O=C(C1=C2C(C=CC=C23)=CC=C1)N(C4=CC=CC(C(C5=CC=CC=C5)=O)=C4)C3=O	0.7	18.2852	288.62	7.80595	0.909613	2.34247
2773	OC(C=C1)=CC=C1P(C(C=C2)=CC=C2OC(C(S(=O)(O)=O)=C3)=CC=C3C(C4=CC=CC(C(C5=CC=CC(S(=O)(O)=O)=C5)=O)=C4)=O)(C6=CC=CC=C6)=O	OC1=CC=C(C(C2=C(C(O)=O)C=CC=C2)C3=CC=C(OC4=CC=CC=C4C#N)C=C3)C=C1	0.9	18.421	299.395	7.86463	1.11534	2.34227
1352	O=C(C1=CC=C(OC2=CC=C(P(C3=CC=C(O)C=C3)(C4=CC=CC=C4)=O)C=C2)C(S(=O)(O)=O)=C1)C5=CC(S(=O)(O)=O)=CC=C5	O=C1N(C2=CC=CC=C2C(F)(F)F)C(C3=CC=C4C5=C3C1=CC=C5C(N(C6=C(C(F)(F)F)C=CC=C6)C4=O)=O)=O	0.8	17.8959	283.159	7.64178	1.14777	2.34184
2749	OC(C=C1)=CC=C1P(C(C=C2)=CC=C2OC(C(S(=O)(O)=O)=C3)=CC=C3C(C4=CC=CC(C(C5=CC=CC(S(=O)(O)=O)=C5)=O)=C4)=O)(C6=CC=CC=C6)=O	OC1=CC=C(S(C2=CC=C(OC3=CC=C(C4=CC=CC=C4)C=C3)C=C2)(=O)=O)C=C1	0.9	18.216	302.139	7.77914	1.0385	2.34165
2684	OC(C=C1)=CC=C1P(C(C=C2)=CC=C2OC(C(S(=O)(O)=O)=C3)=CC=C3C(C4=CC=CC(C(C5=CC=CC(S(=O)(O)=O)=C5)=O)=C4)=O)(C6=CC=CC=C6)=O	O=P(C1=CC=C(O)C=C1)(C2=CC=CC=C2)C(C=C3)=CC=C3OC(C=C4)=CC=C4S(C5=CC=CC=C5)(=O)=O	0.9	18.3242	307.651	7.82616	1.03397	2.3414
3304	OC1=CC=CC(OC2=CC=C(C=CC=C3)C3=C2)=C1C(C4=C(S(=O)(O)=O)C=CC=C4)=O	O=C(C1=CC=C(C(C2=CC=C(O)C=C2)=O)C=C1)C3=CC=C(OC4=CC=C(C=C4)C(C(F)(F)F)(C(F)(F)F)C5=CC=CC=C5)C=C3	0.9	17.9329	315.654	7.6592	1.17779	2.34135
1104	OC1=C(S(=O)(O)=O)C=C(C=C(S(=O)(O)=O)C(OC2=CC=CC=C2C#N)=C3)C3=C1	O=C(C1=CC(C(C2=CC=CC=C2)=O)=CC=C1)C(C=C3)=CC=C3OC4=CC=C(O)C=C4	0.7	19.7456	293.696	8.43407	1.14048	2.34117
2706	OC(C=C1)=CC=C1P(C(C=C2)=CC=C2OC(C(S(=O)(O)=O)=C3)=CC=C3C(C4=CC=CC(C(C5=CC=CC(S(=O)(O)=O)=C5)=O)=C4)=O)(C6=CC=CC=C6)=O	CCC1=CC=C(OCCCC)C=C1	0.9	17.8206	297.002	7.61187	1.0815	2.34116
1125	OC1=CC=C(S(C2=C(OC3=CC=C(C(C4=CC(S(=O)(O)=O)=CC=C4)=O)C=C3S(=O)(O)=O)C=C(OC5=CC=CC=C5)C=C2)(=O)=O)C=C1	OC1=CC=C(C(C2=CC=C(OC3=CC=C(C(C4=CC=CC=C4)=O)C=C3)C=C2)=O)C=C1	0.7	17.5364	306.84	7.49124	1.09697	2.34093
1246	O=C(C1=CC=C(OC2=CC=CC=C2)C=C1)C3=CC(C4=C(C=CC=C4)OCCCS(=O)(O)=O)=C(C=C3)OCCCS(=O)(O)=O	OC(C=C1)=CC=C1C(C=C2)=CC=C2OC3=C(C#N)C=CC=C3	0.8	18.9453	281.317	8.09307	1.32925	2.34092
1475	OC(C=C1)=CC=C1P(C(C=C2)=CC=C2OC(C(S(=O)(O)=O)=C3)=CC=C3C(C4=CC=CC(C(C5=CC=CC(S(=O)(O)=O)=C5)=O)=C4)=O)(C6=CC=CC=C6)=O	OC1=CC=C(C(C2=C(C(O)=O)C=CC=C2)C3=CC=C(OC4=CC=CC=C4C#N)C=C3)C=C1	0.8	18.0481	285.837	7.70981	1.21191	2.34092
1429	O=C(C1=CC=C(OC2=CC=C(P(C3=CC=C(O)C=C3)(C4=CC=CC=C4)=O)C=C2)C(S(=O)(O)=O)=C1)C5=CC(S(=O)(O)=O)=CC=C5	OC1=CC=C(C2=CC=C(C3=CC=CC=C3C#N)C=C2)C=C1	0.8	18.8369	351.22	8.0472	1.0896	2.3408
725	O=C(C1=CC=C(OC2=CC=CC=C2)C=C1)C3=CC(C4=C(C=CC=C4)OCCCS(=O)(O)=O)=C(C=C3)OCCCS(=O)(O)=O	O=S(C1=CC=CC=C1)(C2=CC=C(OC3=CC=C(O)C(C4=CC(F)=C(F)C=C4)=C3)C=C2)=O	0.7	18.3553	274.835	7.84169	1.28307	2.34073
1385	O=C(C1=CC=C(OC2=CC=C(P(C3=CC=C(O)C=C3)(C4=CC=CC=C4)=O)C=C2)C(S(=O)(O)=O)=C1)C5=CC(S(=O)(O)=O)=CC=C5	O=C(C1=CC=C(CCCCCCCCCCCC)C=C1)C2=CC=CC=C2	0.8	17.9163	346.926	7.6555	1.11366	2.34032
2758	OC(C=C1)=CC=C1P(C(C=C2)=CC=C2OC(C(S(=O)(O)=O)=C3)=CC=C3C(C4=CC=CC(C(C5=CC=CC(S(=O)(O)=O)=C5)=O)=C4)=O)(C6=CC=CC=C6)=O	O=S(C1=CC=C(O)C=C1)(C2=CC=C(OC3=CC=CC=C3)C=C2)=O	0.9	18.292	302.66	7.81875	1.03553	2.3395
1316	O=C(C1=CC=C(OC2=CC=C(P(C3=CC=C(O)C=C3)(C4=CC=CC=C4)=O)C=C2)C(S(=O)(O)=O)=C1)C5=CC(S(=O)(O)=O)=CC=C5	O=C(C1=CC=C(C=C1)F)C2=CC=C(C=C2)OC3=CC=C(C=C3)C(C)(C4=CC=C(C=C4)O)C	0.8	19.6261	355.349	8.3923	1.13169	2.33858
3291	OC1=CC=CC(OC2=CC=C(C=CC=C3)C3=C2)=C1C(C4=C(S(=O)(O)=O)C=CC=C4)=O	O=C1N(C2=CC=CC=C2C(F)(F)F)C(C3=CC=C4C5=C3C1=CC=C5C(N(C6=C(C(F)(F)F)C=CC=C6)C4=O)=O)=O	0.9	19.2159	300.331	8.2184	1.20999	2.33816
1232	O=C(C1=CC=C(OC2=CC=CC=C2)C=C1)C3=CC(C4=C(C=CC=C4)OCCCS(=O)(O)=O)=C(C=C3)OCCCS(=O)(O)=O	OC1=C(F)C(F)=C(C2=C(F)C(F)=C(OC3=CC=C(C(C(F)(F)F)(C(F)(F)F)C4=CC=CC=C4)C=C3)C(F)=C2F)C(F)=C1F	0.8	18.6244	274.042	7.96774	1.2597	2.33747
1398	O=C(C1=CC=C(OC2=CC=C(P(C3=CC=C(O)C=C3)(C4=CC=CC=C4)=O)C=C2)C(S(=O)(O)=O)=C1)C5=CC(S(=O)(O)=O)=CC=C5	O=S(C1=CC=CC=C1)(C2=CC=C(OC3=CC=C(O)C(C4=CC=CC=C4)=C3)C=C2)=O	0.8	18.4341	354.839	7.88641	0.991716	2.33745
2729	OC(C=C1)=CC=C1P(C(C=C2)=CC=C2OC(C(S(=O)(O)=O)=C3)=CC=C3C(C4=CC=CC(C(C5=CC=CC(S(=O)(O)=O)=C5)=O)=C4)=O)(C6=CC=CC=C6)=O	O=S(C1=CC=C(O)C=C1)(C2=CC=C(OC3=CC=C(C=CC=C4)C4=C3)C=C2)=O	0.9	18.2511	294.575	7.80875	1.02939	2.33726
1177	O=S(C1=CC=CC(S(=O)(O)=O)=C1)(C2=CC(S(=O)(O)=O)=C(SC3=CC(C=CC(S)=C4)=C4C=C3)C=C2)=O	O=C(C1=CC(C(C2=CC=CC=C2)=O)=CC=C1)C(C=C3)=CC=C3OC4=CC=C(O)C=C4	0.7	17.6697	340.537	7.56038	1.13588	2.33714
314	O=S(C1=CC=C(O)C(S(=O)(O)=O)=C1)(C2=CC(S(=O)(O)=O)=C(OC3=CC=C(C=C(O)C=C4)C4=C3)C=C2)=O	O=C(C1=CC(C(C2=CC=CC=C2)=O)=CC=C1)C(C=C3)=CC=C3OC4=CC=C(O)C=C4	0.5	19.0972	316.064	8.17241	1.16949	2.33679
1451	O=C(C1=CC=C(OC2=CC=C(P(C3=CC=C(O)C=C3)(C4=CC=CC=C4)=O)C=C2)C(S(=O)(O)=O)=C1)C5=CC(S(=O)(O)=O)=CC=C5	CCCCCCN(C1=O)C(C2=CC=CC(C2=C1C=C3)=C3C4=C5C(C6=CC=C5)=C(C(NC6=O)=O)C=C4)=O	0.8	18.2479	300.424	7.8108	1.1498	2.33624
2632	O=C(C1=CC=C(OC2=CC=C(P(C3=CC=C(O)C=C3)(C4=CC=CC=C4)=O)C=C2)C(S(=O)(O)=O)=C1)C5=CC(S(=O)(O)=O)=CC=C5	N=P(OC1=CC=C(F)C=C1)OC2=CC=C(OC)C=C2	0.9	19.7862	349.122	8.47007	1.04397	2.33601
2728	OC(C=C1)=CC=C1P(C(C=C2)=CC=C2OC(C(S(=O)(O)=O)=C3)=CC=C3C(C4=CC=CC(C(C5=CC=CC(S(=O)(O)=O)=C5)=O)=C4)=O)(C6=CC=CC=C6)=O	OC1=CC=CC(OC2=CC=C(C=CC=C3)C3=C2)=C1C#N	0.9	18.1906	293.147	7.78713	1.0934	2.33599
2708	OC(C=C1)=CC=C1P(C(C=C2)=CC=C2OC(C(S(=O)(O)=O)=C3)=CC=C3C(C4=CC=CC(C(C5=CC=CC(S(=O)(O)=O)=C5)=O)=C4)=O)(C6=CC=CC=C6)=O	O=C(C1=CC=C(OC2=CC=C(C(C3=CC=CC=C3C(O)=O)C4=CC=C(O)C=C4)C=C2)C=C1)C5=CC=CC=C5	0.9	18.2599	301.924	7.81736	1.08228	2.33581
731	O=C(C1=CC=C(OC2=CC=CC=C2)C=C1)C3=CC(C4=C(C=CC=C4)OCCCS(=O)(O)=O)=C(C=C3)OCCCS(=O)(O)=O	O=S(C1=C(C2=NC3=C(C=C(N=CS4)C4=C3)S2)C=CC=C1)(C5=CC=CC=C5)=O	0.7	17.6599	293.723	7.56515	1.1698	2.33437
3281	OC1=CC=CC(OC2=CC=C(C=CC=C3)C3=C2)=C1C(C4=C(S(=O)(O)=O)C=CC=C4)=O	O=S(C1=CC=CC=C1)(C2=CC=C(C=C2)OC3=CC=C(C=C3)C4(C5=CC=C(C=C5)O)C6=C(C=CC=C6)C7=C4C=CC=C7)=O	0.9	17.9883	309.135	7.70864	1.1708	2.33353
1331	O=C(C1=CC=C(OC2=CC=C(P(C3=CC=C(O)C=C3)(C4=CC=CC=C4)=O)C=C2)C(S(=O)(O)=O)=C1)C5=CC(S(=O)(O)=O)=CC=C5	O=S(C(C=C1)=CC=C1C2=NC3=CC=C(C4=CC=C(NC=N5)C5=C4)C=C3N2)(C6=CC=CC=C6)=O	0.8	18.8391	304.312	8.07497	1.0044	2.33303
618	OC1=CC=C(S(C2=C(OC3=CC=C(C(C4=CC(S(=O)(O)=O)=CC=C4)=O)C=C3S(=O)(O)=O)C=C(OC5=CC=CC=C5)C=C2)(=O)=O)C=C1	O=C(C1=CC(C2=C(OC)C=CC=C2)=C(OC)C=C1)C(C=C3)=CC=C3OC4=CC=C(C(O)=O)C=C4	0.6	17.973	289.298	7.70432	1.22236	2.33284
2676	OC(C=C1)=CC=C1P(C(C=C2)=CC=C2OC(C(S(=O)(O)=O)=C3)=CC=C3C(C4=CC=CC(C(C5=CC=CC(S(=O)(O)=O)=C5)=O)=C4)=O)(C6=CC=CC=C6)=O	O=P(C1=CC=C(OC2=CC=C(C3=NNC(C4=C3C=CC=C4)=O)C=C2)C=C1)(C5=CC=CC=C5)C6=CC=CC=C6	0.9	18.1387	289.48	7.77764	1.07411	2.33215
1978	O=S(C1=CC=CC(S(=O)(O)=O)=C1)(C2=CC(S(=O)(O)=O)=C(SC3=CC(C=CC(S)=C4)=C4C=C3)C=C2)=O	O=C(C1=C2C(C=CC=C23)=CC=C1)N(C4=CC=CC(C(C5=CC=CC=C5)=O)=C4)C3=O	0.8	17.6651	340.612	7.57919	1.12604	2.33073
661	O=C(C1=C2C=CC=C1)N(CCCS(=O)(O)=O)C2(C3=CC=C(O)C=C3)C(C=C4)=CC=C4OC5=CC=C(S(C6=CC=CC(S(=O)(O)=O)=C6)(=O)=O)C=C5S(=O)(O)=O	OC1=C(OC2=CC=C(C(C3=CC(C(C4=CC=CC=C4)=O)=CC=C3)=O)C=C2)C=C5C(C6C=CC5C6)=C1	0.6	17.7024	269.993	7.5963	0.676731	2.3304
3381	OC1=CC=CC(OC2=CC=C(C=CC=C3)C3=C2)=C1C(C4=C(S(=O)(O)=O)C=CC=C4)=O	O=C1C(C=CC=C2)=C2C(C(C=C3)=CC=C3OC(C=C4)=CC=C4C(N5)=NC(C5=C6)=CC=C6C7=CC(N=CN8)=C8C=C7)=NN1C9=CC=CC=C9	0.9	17.9583	302.885	7.7076	1.1923	2.32994
1145	OC1=CC2=C(C=C(S(=O)(O)=O)C=C2OC3=CC=CC=C3C#N)C=C1	O=C(C1=CC=C(C(C2=CC=C(OC3=CC=C(O)C(C(C)(C)C)=C3)C=C2)=O)C=C1)C4=CC=CC=C4	0.7	17.5441	299.885	7.53095	1.2335	2.3296
742	O=C(C1=CC=C(OC2=CC=CC=C2)C=C1)C3=CC(C4=C(C=CC=C4)OCCCS(=O)(O)=O)=C(C=C3)OCCCS(=O)(O)=O	OC1=CC=C(S(=O)(C2=CC=C(OC3=CC=C(S(C4=CC=CC=C4)(=O)=O)C=C3)C=C2)=O)C=C1	0.7	17.7362	267.561	7.61445	1.21824	2.32928
590	O=S(C1=CC=CC(S(=O)(O)=O)=C1)(C2=CC=C(OC3=CC=C(C4=CC=C(O)C=C4)C=C3)C(S(=O)(O)=O)=C2)=O	O=C(C1=CC=CC=C1)C2=CC=C(C(C3=CC=CC=C3)=O)C=C2	0.6	18.5036	317.943	7.9447	0.988741	2.32905
2774	OC(C=C1)=CC=C1P(C(C=C2)=CC=C2OC(C(S(=O)(O)=O)=C3)=CC=C3C(C4=CC=CC(C(C5=CC=CC(S(=O)(O)=O)=C5)=O)=C4)=O)(C6=CC=CC=C6)=O	O=C(C1=CC=C(C2=CC=C(OC3=CC=CC=C3)C=C2)C=C1)C4=CC=CC=C4	0.9	17.6936	302.075	7.59784	1.07715	2.32877
486	O=C(C1=CC=C(OC2=CC=C(C(C3=CC=CC=C3C(O)=O)C4=CC=C(O)C=C4)C=C2)C(S(=O)(O)=O)=C1)C5=CC(S(=O)(O)=O)=CC=C5	O=P(C1=CC=C(O)C=C1)(C2=CC=CC=C2)C(C=C3)=CC=C3OC(C=C4)=CC=C4S(C5=CC=CC=C5)(=O)=O	0.6	18.0353	336.213	7.74567	1.12934	2.32843
2504	O=C(C1=CC=C(OC2=CC=C(P(C3=CC=C(O)C=C3)(C4=CC=CC=C4)=O)C=C2)C(S(=O)(O)=O)=C1)C5=CC(S(=O)(O)=O)=CC=C5	O=CC1=CC=C(OC2=CC=C(C3=NC4=C(C=C(C5=CC(N=CN6)=C6C=C5)C=C4)N3)C=C2)C=C1	0.9	20.0254	335.069	8.60206	1.03022	2.32798
2741	OC(C=C1)=CC=C1P(C(C=C2)=CC=C2OC(C(S(=O)(O)=O)=C3)=CC=C3C(C4=CC=CC(C(C5=CC=CC(S(=O)(O)=O)=C5)=O)=C4)=O)(C6=CC=CC=C6)=O	OC1=CC=C(S(=O)(C2=CC=C(OC3=CC=C(S(C4=CC=CC=C4)(=O)=O)C=C3)C=C2)=O)C=C1	0.9	18.446	300.853	7.92672	1.02976	2.32706
1905	OC1=CC=C(S(C2=C(OC3=CC=C(C(C4=CC(S(=O)(O)=O)=CC=C4)=O)C=C3S(=O)(O)=O)C=C(OC5=CC=CC=C5)C=C2)(=O)=O)C=C1	O=C(C1=CC=C(OC2=C(C=CC=C3C(N(C4=CC=CC=C4C)C5=O)=O)C3=C5C=C2)C=C1)C6=CC=CC=C6	0.8	17.83	300	7.66287	0.785882	2.3268
1065	O=S(C1=CC=CC(S(=O)(O)=O)=C1)(C2=CC=C(OC3=CC=C(O)C(C4=CC=CC=C4)=C3)C(S(=O)(O)=O)=C2)=O	O=C(C1=CC=CC=C1)C2=CC=C(C(C3=CC=CC=C3)=O)C=C2	0.7	18.5191	338.512	7.95935	0.918028	2.32671
3246	OC1=CC=CC(OC2=CC=C(C=CC=C3)C3=C2)=C1C(C4=C(S(=O)(O)=O)C=CC=C4)=O	[H]/C([H])=C/C(C(F)=C1F)=C(C(F)=C1OC2=CC(C3=CC=C(C(OC4=C(C(F)=C(C(F)=C4F)/C=C([H])\[H])F)=C3)N5C(C6=CC=C(C7=C8C=CC(C5=O)=C67)C(NC8=O)=O)=O)=CC=C2)F	0.9	18.1869	306.053	7.81829	1.32345	2.3262
3295	OC1=CC=CC(OC2=CC=C(C=CC=C3)C3=C2)=C1C(C4=C(S(=O)(O)=O)C=CC=C4)=O	O=C(N(C1=O)C2=CC=C(C(C=C3C(F)(F)F)=CC=C3OC(C=C4)=CC=C4OC(C=C5)=C(C(F)(F)F)C=C5C6=CC=CC=C6)C=C2)C7=C8C1=CC=C(C(NC9=O)=O)C8=C9C=C7	0.9	17.9243	306.051	7.7076	1.48856	2.32553
2700	OC(C=C1)=CC=C1P(C(C=C2)=CC=C2OC(C(S(=O)(O)=O)=C3)=CC=C3C(C4=CC=CC(C(C5=CC=CC(S(=O)(O)=O)=C5)=O)=C4)=O)(C6=CC=CC=C6)=O	O=S(C1=C(C2=NC3=C(C=C(N=CS4)C4=C3)S2)C=CC=C1)(C5=CC=CC=C5)=O	0.9	18.0136	269.289	7.7552	1.07871	2.32278
741	O=C(C1=CC=C(OC2=CC=CC=C2)C=C1)C3=CC(C4=C(C=CC=C4)OCCCS(=O)(O)=O)=C(C=C3)OCCCS(=O)(O)=O	O=S(C1=CC=C(OC2=CC=CC=C2C3=CC=C(F)C=C3)C=C1)(C4=CC=C(O)C=C4)=O	0.7	18.274	275.238	7.86823	1.38354	2.3225
3355	OC1=CC=CC(OC2=CC=C(C=CC=C3)C3=C2)=C1C(C4=C(S(=O)(O)=O)C=CC=C4)=O	O=P(C1=CC=C(SC2=CC=C(C(C(F)(F)F)(C(F)(F)F)C3=CC=C(S)C=C3)C=C2)C=C1)(C4=CC=CC=C4)C5=CC=CC=C5	0.9	17.8829	318.177	7.70057	1.17909	2.32229
2694	OC(C=C1)=CC=C1P(C(C=C2)=CC=C2OC(C(S(=O)(O)=O)=C3)=CC=C3C(C4=CC=CC(C(C5=CC=CC(S(=O)(O)=O)=C5)=O)=C4)=O)(C6=CC=CC=C6)=O	OC1=CC=C(OC2=CC=C(OC3=CC=C(S(C4=CC=CC=C4)(=O)=O)C=C3)C=C2)C=C1	0.9	18.0994	304.903	7.79613	1.07009	2.32159
3311	OC1=CC=CC(OC2=CC=C(C=CC=C3)C3=C2)=C1C(C4=C(S(=O)(O)=O)C=CC=C4)=O	O=P(C1=CC=C(OC2=CC=C(C(C(F)(F)F)(C(F)(F)F)C3=CC=C(O)C=C3)C=C2)C=C1)(C4=CC=CC=C4)C5=CC=CC=C5	0.9	17.9032	317.532	7.71477	1.16427	2.32064
3277	OC1=CC=CC(OC2=CC=C(C=CC=C3)C3=C2)=C1C(C4=C(S(=O)(O)=O)C=CC=C4)=O	FC(C(C1=CC=CC=C1)(C(F)(F)F)C2=CC=C(C3=NC4=C(N3)C=C(C5=CC=C(NC=N6)C6=C5)C=C4)C=C2)(F)F	0.9	18.931	307.889	8.15773	1.21524	2.32063
726	O=C(C1=CC=C(OC2=CC=CC=C2)C=C1)C3=CC(C4=C(C=CC=C4)OCCCS(=O)(O)=O)=C(C=C3)OCCCS(=O)(O)=O	FC1=C(O)C(F)=C(F)C(C2=C(F)C(F)=C(OC3=CC=C(C4=CC=C(O)C=C4)C=C3)C(F)=C2F)=C1F	0.7	18.488	291.743	7.96786	1.25481	2.32032
2760	OC(C=C1)=CC=C1P(C(C=C2)=CC=C2OC(C(S(=O)(O)=O)=C3)=CC=C3C(C4=CC=CC(C(C5=CC=CC(S(=O)(O)=O)=C5)=O)=C4)=O)(C6=CC=CC=C6)=O	OC1=CC=C(C2=CC=C(C3=CC=CC=C3C#N)C=C2)C=C1	0.9	18.1713	300.667	7.83245	1.04621	2.32
2688	OC(C=C1)=CC=C1P(C(C=C2)=CC=C2OC(C(S(=O)(O)=O)=C3)=CC=C3C(C4=CC=CC(C(C5=CC=CC(S(=O)(O)=O)=C5)=O)=C4)=O)(C6=CC=CC=C6)=O	O=S(C1=CC=C(O)C=C1)(C2=CC=C(OC3=CC=C(C(C4=CC=CC=C4)=O)C=C3)C=C2)=O	0.9	18.2063	305.574	7.84812	1.03549	2.31983
1733	OC1=CC=CC(OC2=CC=C(C=CC=C3)C3=C2)=C1C(C4=C(S(=O)(O)=O)C=CC=C4)=O	O=S(C1=CC=C(O)C=C1)(C2=CC=C(OC3=CC=C(C(C(F)(F)F)(C(F)(F)F)C4=CC=CC=C4)C=C3)C=C2)=O	0.8	18.7948	308.187	8.10465	1.24816	2.31901
1220	O=S(C(C=C1S(=O)(O)=O)=CC=C1OC(C=C2)=CC=C2C(C=C3)=CC=C3OC(C(F)=C4F)=C(F)C(F)=C4C5=C(F)C(F)=C(F)C(F)=C5F)(C6=CC=C(S(=O)(C7=CC=C(S(=O)(C8=CC=C(S(=O)(C9=CC=C(S(=O)(OC%10=CC=C(C%11=CC=C(OC%12=C(F)C(F)=C(C%13=C(F)C(F)=C(F)C(F)=C%13F)C(F)=C%12F)C=C%11)C(S(=O)(O)=O)=C%10)=O)C=C9S(=O)(O)=O)=O)C=C8)=O)C=C7)=O)C(S(=O)(O)=O)=C6)=O	FC1=C(O)C(F)=C(F)C(C2=C(F)C(F)=C(OC3=CC=C(C4=CC=C(O)C=C4)C=C3)C(F)=C2F)=C1F	0.8	17.6286	303.2	7.60465	0.794586	2.31814
2748	OC(C=C1)=CC=C1P(C(C=C2)=CC=C2OC(C(S(=O)(O)=O)=C3)=CC=C3C(C4=CC=CC(C(C5=CC=CC(S(=O)(O)=O)=C5)=O)=C4)=O)(C6=CC=CC=C6)=O	OC1=CC=C(C(C(C=C2)=CC=C2OC(C=C3)=CC=C3C(CCC(O)=O)(C)C4=CC=CC=C4)=O)C=C1	0.9	18.7425	301.631	8.09318	1.1037	2.31585
2661	OC(C=C1)=CC=C1P(C(C=C2)=CC=C2OC(C(S(=O)(O)=O)=C3)=CC=C3C(C4=CC=CC(C(C5=CC=CC(S(=O)(O)=O)=C5)=O)=C4)=O)(C6=CC=CC=C6)=O	O=S(C1=CC=CC=C1)(C2=CC=C(OC3=CC=C(O)C(C4=CC(F)=C(F)C=C4)=C3)C=C2)=O	0.9	18.1144	298.165	7.82195	1.03316	2.31584
1070	O=S(C1=CC=CC(S(=O)(O)=O)=C1)(C2=CC=C(OC3=CC=C(O)C=C3)C(S(=O)(O)=O)=C2)=O	O=C(C1=CC=C(OC2=CC=CC(OC3=CC=CC(OC4=CC=CC(OC5=CC=CC(OC6=CC=CC(OC7=CC=C(C(C8=CC=CC=C8)=O)C=C7)=C6)=C5C#N)=C4)=C3C#N)=C2)C=C1)C9=CC=CC=C9	0.7	18.4235	306.33	7.95595	1.19843	2.31569
666	O=C(C1=C2C=CC=C1)N(CCCS(=O)(O)=O)C2(C3=CC=C(O)C=C3)C(C=C4)=CC=C4OC5=CC=C(S(C6=CC=CC(S(=O)(O)=O)=C6)(=O)=O)C=C5S(=O)(O)=O	O=C(C1=CC(C(C2=CC=CC=C2)=O)=CC=C1)C(C=C3)=CC=C3OC4=CC=C(C5=CC=C(O)C=C5)C=C4	0.6	17.6553	289.882	7.62739	0.673866	2.31473
3253	OC1=CC=CC(OC2=CC=C(C=CC=C3)C3=C2)=C1C(C4=C(S(=O)(O)=O)C=CC=C4)=O	CC(CCC(N1C=CN=N1)=O)(C2=CC=C(O)C=C2)C(C=C3)=CC=C3OC(C=C4)=CC=C4C(C5=CC=CC=C5)=O	0.9	18.5448	304.401	8.01512	1.19306	2.31373
2664	OC(C=C1)=CC=C1P(C(C=C2)=CC=C2OC(C(S(=O)(O)=O)=C3)=CC=C3C(C4=CC=CC(C(C5=CC=CC(S(=O)(O)=O)=C5)=O)=C4)=O)(C6=CC=CC=C6)=O	C=S(C(C=C1)=CC=C1OC2=CC3=CC=CC=C3C=C2)(C4=CC=C(OC5=CC=C(C=CC(O)=C6)C6=C5)C=C4)=C	0.9	18.1007	293.323	7.82553	1.09122	2.31303
1469	OC(C=C1)=CC=C1P(C(C=C2)=CC=C2OC(C(S(=O)(O)=O)=C3)=CC=C3C(C4=CC=CC(C(C5=CC=CC(S(=O)(O)=O)=C5)=O)=C4)=O)(C6=CC=CC=C6)=O	OC1=CC=C(C(C(C=C2)=CC=C2OC(C=C3)=CC=C3C(CCC(O)=O)(C)C4=CC=CC=C4)=O)C=C1	0.8	18.1829	296.707	7.86214	1.14836	2.31272
1407	O=C(C1=CC=C(OC2=CC=C(P(C3=CC=C(O)C=C3)(C4=CC=CC=C4)=O)C=C2)C(S(=O)(O)=O)=C1)C5=CC(S(=O)(O)=O)=CC=C5	OC1=CC=C(S(=O)(C2=CC=C(OC3=CC=C(S(C4=CC=CC=C4)(=O)=O)C=C3)C=C2)=O)C=C1	0.8	18.9909	352.032	8.21155	0.946781	2.3127
1337	O=C(C1=CC=C(OC2=CC=C(P(C3=CC=C(O)C=C3)(C4=CC=CC=C4)=O)C=C2)C(S(=O)(O)=O)=C1)C5=CC(S(=O)(O)=O)=CC=C5	OC1=C(OC2=CC=C(C(C3=CC(C(C4=CC=CC=C4)=O)=CC=C3)=O)C=C2)C=C5C(C6C=CC5C6)=C1	0.8	18.9427	345.525	8.19106	1.12964	2.3126
1171	O=S(C1=CC(S(=O)(O)=O)=CC=C1)(C2=CC=C(OC3=CC=C(C4(NC(C5=C4C=CC=C5)=O)C6=CC=C(O)C=C6)C=C3)C(S(=O)(O)=O)=C2)=O	O=C(C1=CC=C(OC2=CC=C(P(C3=CC=C(O)C=C3)(C4=CC=CC=C4)=O)C=C2)C=C1)C5=CC=CC=C5	0.7	17.7741	284.06	7.68696	1.05476	2.31224
1829	O=S(C1=CC=CC(S(=O)(O)=O)=C1)(C2=CC=C(OC3=CC=C(O)C(C4=CC=CC=C4)=C3)C(S(=O)(O)=O)=C2)=O	O=C(C1=CC=CC2=C1C3=CC=C2)N(NC4=CC=C(OC5=CC=C(NN(C6=O)C(C7=C(C6=CC=C8)C8=CC=C7)=O)C=C5)C=C4)C3=O	0.8	18.0138	318.793	7.79086	0.594446	2.31217
2754	OC(C=C1)=CC=C1P(C(C=C2)=CC=C2OC(C(S(=O)(O)=O)=C3)=CC=C3C(C4=CC=CC(C(C5=CC=CC(S(=O)(O)=O)=C5)=O)=C4)=O)(C6=CC=CC=C6)=O	O=C(C1=CC=CC=C1)C2=CC=CC=C2	0.9	17.856	299.134	7.72337	1.0708	2.31194
1387	O=C(C1=CC=C(OC2=CC=C(P(C3=CC=C(O)C=C3)(C4=CC=CC=C4)=O)C=C2)C(S(=O)(O)=O)=C1)C5=CC(S(=O)(O)=O)=CC=C5	O=C(C1=CC=C(OC2=CC=C(C(C3=C(F)C(F)=C(OC4=CC=C(C(C(F)(F)F)(C(F)(F)F)C5=CC=C(O)C=C5)C=C4)C(F)=C3F)=O)C=C2)C=C1)C6=C(F)C(F)=CC(F)=C6F	0.8	18.767	286.557	8.12083	1.44785	2.31098
3264	OC1=CC=CC(OC2=CC=C(C=CC=C3)C3=C2)=C1C(C4=C(S(=O)(O)=O)C=CC=C4)=O	CC(C)(C1=CC=C(O)C=C1)C(C=C2)=CC=C2OC(C(C(F)(F)F)=C3)=CC=C3C4=CC=C(C5=CC=C(C6=CC=CC(C(F)(F)F)=C6)C=C5)C=C4	0.9	17.6903	313.394	7.65628	1.28137	2.31056
488	O=C(C1=CC=C(OC2=CC=C(C(C3=CC=CC=C3C(O)=O)C4=CC=C(O)C=C4)C=C2)C(S(=O)(O)=O)=C1)C5=CC(S(=O)(O)=O)=CC=C5	O=C(C1=CC(C2=C(OC)C=CC=C2)=C(OC)C=C1)C(C=C3)=CC=C3OC4=CC=C(C(O)=O)C=C4	0.6	19.6313	269.879	8.49924	1.29496	2.30977
2598	O=C(C1=CC=C(OC2=CC=C(P(C3=CC=C(O)C=C3)(C4=CC=CC=C4)=O)C=C2)C(S(=O)(O)=O)=C1)C5=CC(S(=O)(O)=O)=CC=C5	OC(C=C1)=CC=C1C(C=C2)=CC=C2OC3=C(C#N)C=CC=C3	0.9	19.8809	351.036	8.60747	1.02641	2.30973
2733	OC(C=C1)=CC=C1P(C(C=C2)=CC=C2OC(C(S(=O)(O)=O)=C3)=CC=C3C(C4=CC=CC(C(C5=CC=CC(S(=O)(O)=O)=C5)=O)=C4)=O)(C6=CC=CC=C6)=O	O=S(C1=CC=CC=C1)(C2=CC=C(OC3=CC=C(O)C=C3)C=C2)=O	0.9	18.1161	304.188	7.84919	1.03129	2.30802
1846	O=S(C1=CC=CC(S(=O)(O)=O)=C1)(C2=CC=C(OC3=CC=C(C4=CC=C(O)C=C4)C=C3)C(S(=O)(O)=O)=C2)=O	O=C(C1=CC=CC2=C1C3=CC=C2)N(NC4=CC=C(CC5=CC=C(NN(C6=O)C(C7=C(C6=CC=C8)C8=CC=C7)=O)C=C5)C=C4)C3=O	0.8	17.6558	273.401	7.6508	0.674337	2.3077
1076	O=S(C1=CC=CC(S(=O)(O)=O)=C1)(C2=CC=C(OC3=CC=C(O)C=C3)C(S(=O)(O)=O)=C2)=O	O=C(C1=CC=CC=C1)C2=CC=C(C(C3=CC=CC=C3)=O)C=C2	0.7	19.7756	312.106	8.56985	0.813935	2.30757
1175	O=S(C1=CC=CC(S(=O)(O)=O)=C1)(C2=CC(S(=O)(O)=O)=C(SC3=CC(C=CC(S)=C4)=C4C=C3)C=C2)=O	O=C(C1=CC=CC=C1)C2=CC=C(C(C3=CC=CC=C3)=O)C=C2	0.7	18.5774	320.525	8.05377	1.14481	2.30667
2521	O=C(C1=CC=C(OC2=CC=C(P(C3=CC=C(O)C=C3)(C4=CC=CC=C4)=O)C=C2)C(S(=O)(O)=O)=C1)C5=CC(S(=O)(O)=O)=CC=C5	OC1=CC=C(C2(C3=CC=CC=C3C4=CC=CC=C42)C5=CC=C(OC6=CC=C(P(C7=CC=CC=C7)(C8=CC=CC=C8)=O)C=C6)C=C5)C=C1	0.9	19.6496	357.558	8.52053	1.01486	2.30614
2691	OC(C=C1)=CC=C1P(C(C=C2)=CC=C2OC(C(S(=O)(O)=O)=C3)=CC=C3C(C4=CC=CC(C(C5=CC=CC(S(=O)(O)=O)=C5)=O)=C4)=O)(C6=CC=CC=C6)=O	O=S(C1=CC=CC=C1)(C2=CC=C(C=C2)OC3=CC=C(C=C3)C4(C5=CC=C(C=C5)O)C6=C(C=CC=C6)C7=C4C=CC=C7)=O	0.9	18.0145	289.449	7.81478	1.04151	2.30518
1317	O=C(C1=CC=C(OC2=CC=C(P(C3=CC=C(O)C=C3)(C4=CC=CC=C4)=O)C=C2)C(S(=O)(O)=O)=C1)C5=CC(S(=O)(O)=O)=CC=C5	FC1=C(O)C(F)=C(F)C(C2=C(F)C(F)=C(OC3=CC=C(C4=CC=C(O)C=C4)C=C3)C(F)=C2F)=C1F	0.8	19.4246	353.955	8.43378	1.12076	2.30319
1341	O=C(C1=CC=C(OC2=CC=C(P(C3=CC=C(O)C=C3)(C4=CC=CC=C4)=O)C=C2)C(S(=O)(O)=O)=C1)C5=CC(S(=O)(O)=O)=CC=C5	O=S(C1=CC=C(O)C=C1)(C2=CC=C(OC3=CC=C(C(C4=CC=CC=C4)=O)C=C3)C=C2)=O	0.8	19.3414	356.063	8.39786	0.97423	2.30314
1406	O=C(C1=CC=C(OC2=CC=C(P(C3=CC=C(O)C=C3)(C4=CC=CC=C4)=O)C=C2)C(S(=O)(O)=O)=C1)C5=CC(S(=O)(O)=O)=CC=C5	O=S(C1=CC=C(OC2=CC=CC=C2C3=CC=C(F)C=C3)C=C1)(C4=CC=C(O)C=C4)=O	0.8	18.7349	351.458	8.14303	1.03843	2.30073
1437	O=C(C1=CC=C(OC2=CC=C(P(C3=CC=C(O)C=C3)(C4=CC=CC=C4)=O)C=C2)C(S(=O)(O)=O)=C1)C5=CC(S(=O)(O)=O)=CC=C5	O=C(NC1=O)C2=C(C1=CC=C3C(N(C4=CC=C(OC5=C(C(F)(F)F)C=C(C6=CC=CC(C7=CC=C(OC8=CC=CC=C8)C(C(F)(F)F)=C7)=N6)C=C5)C=C4)C9=O)=O)C3=C9C=C2	0.8	18.2106	279.375	7.91782	1.50289	2.29995
3310	OC1=CC=CC(OC2=CC=C(C=CC=C3)C3=C2)=C1C(C4=C(S(=O)(O)=O)C=CC=C4)=O	O=C(C1=CC=C(OC2=CC=C(C(C3=CC=CC=C3C4=NC(C=CC=C5)=C5N4)C6=CC=C(O)C=C6)C=C2)C=C1)C7=CC=CC=C7	0.9	17.9532	310.468	7.80633	1.18647	2.29983
1241	O=C(C1=CC=C(OC2=CC=CC=C2)C=C1)C3=CC(C4=C(C=CC=C4)OCCCS(=O)(O)=O)=C(C=C3)OCCCS(=O)(O)=O	OC1=CC=CC(OC2=CC=C(C=CC=C3)C3=C2)=C1C#N	0.8	18.9974	269.054	8.26104	1.34906	2.29964
1907	OC1=CC=C(S(C2=C(OC3=CC=C(C(C4=CC(S(=O)(O)=O)=CC=C4)=O)C=C3S(=O)(O)=O)C=C(OC5=CC=CC=C5)C=C2)(=O)=O)C=C1	O=S(C1=C(C2=NC3=C(C=C(N=CS4)C4=C3)S2)C=CC=C1)(C5=CC=CC=C5)=O	0.8	17.7598	315.243	7.72388	0.710009	2.29934
2713	OC(C=C1)=CC=C1P(C(C=C2)=CC=C2OC(C(S(=O)(O)=O)=C3)=CC=C3C(C4=CC=CC(C(C5=CC=CC(S(=O)(O)=O)=C5)=O)=C4)=O)(C6=CC=CC=C6)=O	OC(C=C1)=CC=C1C(C)(C)C(C=C2)=CC=C2OC3=CC=C(C(C4=CC=CC=C4)=O)C=C3	0.9	18.2715	308.611	7.94682	1.09647	2.29922
1100	OC1=C(S(=O)(O)=O)C=C(C=C(S(=O)(O)=O)C(OC2=CC=CC=C2C#N)=C3)C3=C1	O=C(C1=CC=CC=C1)C2=CC=C(C(C3=CC=CC=C3)=O)C=C2	0.7	20.559	285.341	8.94195	1.0856	2.29917
1428	O=C(C1=CC=C(OC2=CC=C(P(C3=CC=C(O)C=C3)(C4=CC=CC=C4)=O)C=C2)C(S(=O)(O)=O)=C1)C5=CC(S(=O)(O)=O)=CC=C5	OC(C=C1)=CC=C1C(C(F)(F)F)(C(F)(F)F)C(C=C2)=CC=C2OC3=NC4=CC(C(C(F)(F)F)(C(F)(F)F)C5=CC6=C(C=C5)OC(C7=CC=CC=C7)=N6)=CC=C4O3	0.8	17.8385	331.123	7.75913	1.36296	2.29903
2568	O=C(C1=CC=C(OC2=CC=C(P(C3=CC=C(O)C=C3)(C4=CC=CC=C4)=O)C=C2)C(S(=O)(O)=O)=C1)C5=CC(S(=O)(O)=O)=CC=C5	SC1=CC=C(SC2=CC=C(SC3=CC=C(S(C4=CC=CC=C4)(=O)=O)C=C3)C=C2)C=C1	0.9	19.508	347.032	8.48724	1.05017	2.29852
1332	O=C(C1=CC=C(OC2=CC=C(P(C3=CC=C(O)C=C3)(C4=CC=CC=C4)=O)C=C2)C(S(=O)(O)=O)=C1)C5=CC(S(=O)(O)=O)=CC=C5	O=S(C1=CC=CC=C1C2=NC3=CC=C(C4=CC=C(N=CN5)C5=C4)C=C3N2)(C6=CC=CC=C6)=O	0.8	18.9485	306.871	8.24444	1.00773	2.29833
1342	O=C(C1=CC=C(OC2=CC=C(P(C3=CC=C(O)C=C3)(C4=CC=CC=C4)=O)C=C2)C(S(=O)(O)=O)=C1)C5=CC(S(=O)(O)=O)=CC=C5	O=S(C1=CC=CC=C1)(C2=CC=C(C=C2)OC3=CC=C(C=C3C4=CC=CC=C4)C(C)(C5=CC=C(C(C6=CC=CC=C6)=C5)O)C)=O	0.8	18.3424	357.842	7.98159	1.08359	2.29809
1379	O=C(C1=CC=C(OC2=CC=C(P(C3=CC=C(O)C=C3)(C4=CC=CC=C4)=O)C=C2)C(S(=O)(O)=O)=C1)C5=CC(S(=O)(O)=O)=CC=C5	O=C(N1)C2=C(C(C1=O)=CC=C3C4=O)C3=C(C(N4C5=CC=C(OC6=CC=C(C7=CC=C(OC8=C(C(F)(F)F)C=CC=C8)C=C7)C=C6)C(C(F)(F)F)=C5)=O)C=C2	0.8	18.446	301.97	8.02773	1.3141	2.29779
599	OC1=C(S(=O)(O)=O)C=C(C=C(S(=O)(O)=O)C(OC2=CC=CC=C2C#N)=C3)C3=C1	O=C(C1=CC=C(C(C2=CC=C(OC3=CC=C(O)C(C(C)(C)C)=C3)C=C2)=O)C=C1)C4=CC=CC=C4	0.6	19.5364	299.31	8.50251	1.21333	2.29772
2692	OC(C=C1)=CC=C1P(C(C=C2)=CC=C2OC(C(S(=O)(O)=O)=C3)=CC=C3C(C4=CC=CC(C(C5=CC=CC(S(=O)(O)=O)=C5)=O)=C4)=O)(C6=CC=CC=C6)=O	O=S(C1=CC=CC=C1)(C2=CC=C(OC3=CC=C(C=CC(O)=C4)C4=C3)C=C2)=O	0.9	18.0027	293.781	7.83724	1.02813	2.29707
1109	O=S(C1=CC(S(=O)(O)=O)=C(OC2=CC=CC=C2C3=CC=C(F)C=C3)C=C1)(C4=CC=C(O)C(S(=O)(O)=O)=C4)=O	O=C(C1=CC=CC=C1)C2=CC=C(C(C3=CC=CC=C3)=O)C=C2	0.7	17.6793	341.519	7.70368	0.889018	2.29492
297	O=S(C1=CC(S(=O)(O)=O)=C(OC2=CC=CC=C2C3=CC=C(F)C=C3)C=C1)(C4=CC=C(O)C(S(=O)(O)=O)=C4)=O	OC1=CC=C(C(C2=CC=C(OC3=CC=C(C(C4=CC=CC=C4)=O)C=C3)C=C2)=O)C=C1	0.5	17.5275	331.814	7.63767	1.22994	2.29488
2734	OC(C=C1)=CC=C1P(C(C=C2)=CC=C2OC(C(S(=O)(O)=O)=C3)=CC=C3C(C4=CC=CC(C(C5=CC=CC(S(=O)(O)=O)=C5)=O)=C4)=O)(C6=CC=CC=C6)=O	O=S(C1=CC=CC=C1)(C2=CC=C(OC3=CC=C(O)C(C4=CC=C(F)C=C4)=C3)C=C2)=O	0.9	17.8733	300.49	7.79132	1.04739	2.29399
3384	OC1=CC=CC(OC2=CC=C(C=CC=C3)C3=C2)=C1C(C4=C(S(=O)(O)=O)C=CC=C4)=O	O=C(NC1=O)C2=C(C1=CC=C3C(N(C4=CC=C(OC5=C(C(F)(F)F)C=C(C6=CC=CC(C7=CC=C(OC8=CC=CC=C8)C(C(F)(F)F)=C7)=N6)C=C5)C=C4)C9=O)=O)C3=C9C=C2	0.9	18.0434	300	7.86871	1.49731	2.29305
1239	O=C(C1=CC=C(OC2=CC=CC=C2)C=C1)C3=CC(C4=C(C=CC=C4)OCCCS(=O)(O)=O)=C(C=C3)OCCCS(=O)(O)=O	SC1=CC=C(SC2=CC=C(SC3=CC=C(S(C4=CC=CC=C4)(=O)=O)C=C3)C=C2)C=C1	0.8	17.6779	294.346	7.71169	1.22247	2.29235
271	O=S(C1=CC=CC(S(=O)(O)=O)=C1)(C2=CC=C(OC3=CC=C(C4=CC=C(O)C=C4)C=C3)C(S(=O)(O)=O)=C2)=O	O=C(C1=CC=CC=C1)C2=CC=C(C(C3=CC=CC=C3)=O)C=C2	0.5	18.1292	295.198	7.90858	1.0831	2.29235
2501	O=C(C1=CC=C(OC2=CC=C(P(C3=CC=C(O)C=C3)(C4=CC=CC=C4)=O)C=C2)C(S(=O)(O)=O)=C1)C5=CC(S(=O)(O)=O)=CC=C5	FC(C(C1=CC=C(C2=NC3=C(C=C(N=CS4)C4=C3)S2)C=C1)(C(F)(F)F)C5=CC=CC=C5)(F)F	0.9	19.5268	338.038	8.5184	1.11135	2.29231
332	O=S(C1=CC=CC(S(=O)(O)=O)=C1)(C2=CC(S(=O)(O)=O)=C(SC3=CC(C=CC(S)=C4)=C4C=C3)C=C2)=O	O=C(C1=CC=C(C(C2=CC=C(OC3=CC=C(O)C(C(C)(C)C)=C3)C=C2)=O)C=C1)C4=CC=CC=C4	0.5	17.9504	334.066	7.83489	1.14643	2.29108
2732	OC(C=C1)=CC=C1P(C(C=C2)=CC=C2OC(C(S(=O)(O)=O)=C3)=CC=C3C(C4=CC=CC(C(C5=CC=CC(S(=O)(O)=O)=C5)=O)=C4)=O)(C6=CC=CC=C6)=O	O=S(C1=CC=CC=C1)(C2=CC=C(OC3=CC=C(O)C(C4=CC=CC=C4)=C3)C=C2)=O	0.9	17.8407	300.944	7.78745	1.03332	2.29096
2665	OC(C=C1)=CC=C1P(C(C=C2)=CC=C2OC(C(S(=O)(O)=O)=C3)=CC=C3C(C4=CC=CC(C(C5=CC=CC(S(=O)(O)=O)=C5)=O)=C4)=O)(C6=CC=CC=C6)=O	O=C(C1=CC=C(C=C1)F)C2=CC=C(C=C2)OC3=CC=C(C=C3)C(C)(C4=CC=C(C=C4)O)C	0.9	18.273	305.779	7.98019	1.12163	2.28979
3250	OC1=CC=CC(OC2=CC=C(C=CC=C3)C3=C2)=C1C(C4=C(S(=O)(O)=O)C=CC=C4)=O	O=C(C1=CC=C(OC2=CC=C(C(C)(C)C3=CC=CC=C3)C=C2)C=C1)C(C=C4)=CC=C4OC5=CC=C(C(C)(C)C6=CC=C(O)C=C6)C=C5	0.9	17.8235	318.925	7.78782	1.21443	2.28863
1425	O=C(C1=CC=C(OC2=CC=C(P(C3=CC=C(O)C=C3)(C4=CC=CC=C4)=O)C=C2)C(S(=O)(O)=O)=C1)C5=CC(S(=O)(O)=O)=CC=C5	O=S(C1=CC=C(O)C=C1)(C2=CC=C(OC3=CC=CC=C3)C=C2)=O	0.8	18.727	358.686	8.18404	0.983732	2.28824
2571	O=C(C1=CC=C(OC2=CC=C(P(C3=CC=C(O)C=C3)(C4=CC=CC=C4)=O)C=C2)C(S(=O)(O)=O)=C1)C5=CC(S(=O)(O)=O)=CC=C5	O=C(NC1=O)C2=C(C1=CC=C3)C3=C(C4=C(C=CC=C5C(N(C6=CC=C(OC7=CC=CC=C7)C=C6)C8=O)=O)C5=C8C=C4)C=C2	0.9	19.1316	331.721	8.3609	1.01469	2.28823
2630	O=C(C1=CC=C(OC2=CC=C(P(C3=CC=C(O)C=C3)(C4=CC=CC=C4)=O)C=C2)C(S(=O)(O)=O)=C1)C5=CC(S(=O)(O)=O)=CC=C5	OC1=CC=C(C2=CC=C(C3=CC=CC=C3C#N)C=C2)C=C1	0.9	19.6963	351.181	8.61021	0.983098	2.28755
1894	OC1=CC=C(S(C2=C(OC3=CC=C(C(C4=CC(S(=O)(O)=O)=CC=C4)=O)C=C3S(=O)(O)=O)C=C(OC5=CC=CC=C5)C=C2)(=O)=O)C=C1	O=S(C1=CC=CC=C1)(C2=CC=C(OC3=CC=C(C(C4=CC=C(OC5=CC=C(S(C6=CC=CC=C6)(=O)=O)C=C5)C=C4)=O)C=C3)C=C2)=O	0.8	18.0794	336.792	7.90406	0.754354	2.28735
605	OC1=C(S(=O)(O)=O)C=C(C=C(S(=O)(O)=O)C(OC2=CC=CC=C2C#N)=C3)C3=C1	O=C(C1=CC(C(C2=CC=CC=C2)=O)=CC=C1)C(C=C3)=CC=C3OC4=CC=C(C5=CC=C(O)C=C5)C=C4	0.6	18.7886	304.726	8.21578	1.22459	2.28689
825	O=S(C1=CC=CC(S(=O)(O)=O)=C1)(C2=CC=C(OC3=CC=C(C=CC(O)=C4)C4=C3)C(S(=O)(O)=O)=C2)=O	O=C(C1=C2C(C=CC=C23)=CC=C1)N(C4=CC=CC(C(C5=CC=CC=C5)=O)=C4)C3=O	0.7	18.2658	286.79	7.9908	0.830161	2.28585
1395	O=C(C1=CC=C(OC2=CC=C(P(C3=CC=C(O)C=C3)(C4=CC=CC=C4)=O)C=C2)C(S(=O)(O)=O)=C1)C5=CC(S(=O)(O)=O)=CC=C5	O=S(C1=CC=C(O)C=C1)(C2=CC=C(OC3=CC=C(C=CC=C4)C4=C3)C=C2)=O	0.8	18.6528	354.613	8.16056	0.958913	2.28572
359	C=C(C1=CC=C(C(S(=O)(O)=O)=C1)F)C2=CC=C(C(S(=O)(O)=O)=C2)OC3=CC=C(C=C3)C4=CC=C(C=C4)OC5=CC=C(C=C5S(=O)(O)=O)C(C6=CC=C(C(S(=O)(O)=O)=C6)F)=C	O=C(C1=CC=CC=C1)C2=CC=C(C(C3=CC=CC=C3)=O)C=C2	0.6	17.9584	299.535	7.85705	0.833856	2.28564
2636	O=C(C1=CC=C(OC2=CC=C(P(C3=CC=C(O)C=C3)(C4=CC=CC=C4)=O)C=C2)C(S(=O)(O)=O)=C1)C5=CC(S(=O)(O)=O)=CC=C5	O=C1C(C=CC=C2)=C2C(C(C=C3)=CC=C3OC(C=C4)=CC=C4C(N5)=NC(C5=C6)=CC=C6C7=CC(N=CN8)=C8C=C7)=NN1C9=CC=CC=C9	0.9	19.5258	330.732	8.54362	1.05008	2.28542
669	O=S(C1=CC=CC(S(=O)(O)=O)=C1)(C2=CC(S(=O)(O)=O)=C(SC3=CC(C=CC(S)=C4)=C4C=C3)C=C2)=O	O=C(C1=CC=CC=C1)C2=CC=C(C(C3=CC=CC=C3)=O)C=C2	0.6	18.2738	289.543	7.99642	1.14665	2.28524
1084	O=S(C1=CC=CC(S(=O)(O)=O)=C1)(C2=CC=C(OC3=CC=C(O)C(C4=CC=C(F)C=C4)=C3)C(S(=O)(O)=O)=C2)=O	O=C(C1=C2C(C=CC=C23)=CC=C1)N(C4=CC=CC(C(C5=CC=CC=C5)=O)=C4)C3=O	0.7	17.7404	293.656	7.76414	0.878983	2.28491
2737	OC(C=C1)=CC=C1P(C(C=C2)=CC=C2OC(C(S(=O)(O)=O)=C3)=CC=C3C(C4=CC=CC(C(C5=CC=CC(S(=O)(O)=O)=C5)=O)=C4)=O)(C6=CC=CC=C6)=O	O=C(C1=CC=CC(C=O)=C1)NC(C=C2)=CC=C2OC3=C(C#N)C(OC4=CC=C(N)C=C4)=CC=C3	0.9	18.0646	300.897	7.90968	1.16931	2.28386
823	O=S(C1=CC=CC(S(=O)(O)=O)=C1)(C2=CC=C(OC3=CC=C(C=CC(O)=C4)C4=C3)C(S(=O)(O)=O)=C2)=O	O=C(C1=CC=CC=C1)C2=CC=C(C(C3=CC=CC=C3)=O)C=C2	0.7	18.7086	332.769	8.19228	0.837992	2.28369
2726	OC(C=C1)=CC=C1P(C(C=C2)=CC=C2OC(C(S(=O)(O)=O)=C3)=CC=C3C(C4=CC=CC(C(C5=CC=CC(S(=O)(O)=O)=C5)=O)=C4)=O)(C6=CC=CC=C6)=O	OC(C=C1)=CC=C1C(C(F)(F)F)(C(F)(F)F)C(C=C2)=CC=C2OC3=CC=C(C(C4=CC=CC=C4)=O)C=C3	0.9	18.1996	309.471	7.97498	1.12262	2.28209
2503	O=C(C1=CC=C(OC2=CC=C(P(C3=CC=C(O)C=C3)(C4=CC=CC=C4)=O)C=C2)C(S(=O)(O)=O)=C1)C5=CC(S(=O)(O)=O)=CC=C5	OC1=CC=C(C2=CC=C(OC3=CC=C(S(=O)(C4=CC=C(OC5=CC=C(C6=CC=C(O)C=C6)C=C5)C=C4)=O)C=C3)C=C2)C=C1	0.9	20.0487	348.948	8.78579	1.06516	2.28194
1356	O=C(C1=CC=C(OC2=CC=C(P(C3=CC=C(O)C=C3)(C4=CC=CC=C4)=O)C=C2)C(S(=O)(O)=O)=C1)C5=CC(S(=O)(O)=O)=CC=C5	O=C(N(C1=O)C2=CC=C(C(C=C3C(F)(F)F)=CC=C3OC(C=C4)=CC=C4OC(C=C5)=C(C(F)(F)F)C=C5C6=CC=CC=C6)C=C2)C7=C8C1=CC=C(C(NC9=O)=O)C8=C9C=C7	0.8	17.9752	304.524	7.87939	1.49937	2.28129
1435	O=C(C1=CC=C(OC2=CC=C(P(C3=CC=C(O)C=C3)(C4=CC=CC=C4)=O)C=C2)C(S(=O)(O)=O)=C1)C5=CC(S(=O)(O)=O)=CC=C5	O=C(NC1=O)C2=C(C1=CC=C3C(N(C4=CC=C(OC5=C(C(F)(F)F)C=C(C6=CC=C(C7=CC=C(OC8=CC=CC=C8)C(C(F)(F)F)=C7)C=C6)C=C5)C=C4)C9=O)=O)C3=C9C=C2	0.8	17.8366	303.945	7.82001	1.50605	2.28089
78	O=S(C1=CC=CC(S(=O)(O)=O)=C1)(C2=CC=C(OC3=CC=C(C=CC(O)=C4)C4=C3)C(S(=O)(O)=O)=C2)=O	O=C(C1=CC(C2=C(OC)C=CC=C2)=C(OC)C=C1)C(C=C3)=CC=C3OC4=CC=C(C(O)=O)C=C4	0.4	17.8137	298.835	7.81227	1.27767	2.28022
794	O=C(C1=CC=C(OC2=CC=C(P(C3=CC=C(O)C=C3)(C4=CC=CC=C4)=O)C=C2)C(S(=O)(O)=O)=C1)C5=CC(S(=O)(O)=O)=CC=C5	O=C(C1=CC=C(OC2=CC=C(C(C3=CC=CC=C3C(O)=O)C4=CC=C(O)C=C4)C=C2)C=C1)C5=CC=CC=C5	0.7	19.2294	353.7	8.43344	1.09945	2.28014
1086	O=S(C1=CC=CC(S(=O)(O)=O)=C1)(C2=CC=C(OC3=CC=C(C4=CC=C(O)C=C4)C=C3)C(S(=O)(O)=O)=C2)=O	O=C(C1=CC=C(OC2=C(C=CC=C3C(N(C4=CC=CC=C4C)C5=O)=O)C3=C5C=C2)C=C1)C6=CC=CC=C6	0.7	17.6814	303.025	7.76013	1.02618	2.27849
1845	O=S(C1=CC=CC(S(=O)(O)=O)=C1)(C2=CC=C(OC3=CC=C(C4=CC=C(O)C=C4)C=C3)C(S(=O)(O)=O)=C2)=O	O=C(C1=CC=CC2=C1C3=CC=C2)N(NC4=CC=C(OC5=CC=C(NN(C6=O)C(C7=C(C6=CC=C8)C8=CC=C7)=O)C=C5)C=C4)C3=O	0.8	17.5808	318.811	7.7178	0.591617	2.27796
3397	OC1=CC=CC(OC2=CC=C(C=CC=C3)C3=C2)=C1C(C4=C(S(=O)(O)=O)C=CC=C4)=O	O=C(N(C1=CC(C(C(F)(F)F)(C(F)(F)F)C2=CC=C(OC3=C(F)C(F)=C(C=C)C(F)=C3F)C=C2)=CC=C1OC4=C(F)C(F)=C(C=C)C(F)=C4F)C5=O)C6=CC=C7C8=C6C5=CC=C8C(NC7=O)=O	0.9	17.8247	305.536	7.82527	1.44787	2.27784
1721	O=C(NC1=O)C2=CC=C3C4=C2C1=CC=C4C(N(C5=CC=C(OC6=CC(C=C(OC7=CC=CC=C7)C(S(=O)(O)=O)=C8)=C8C=C6S(=O)(O)=O)C=C5)C3=O)=O	OC(C=C1)=CC=C1C(C=C2)=CC=C2OC3=C(C#N)C=CC=C3	0.8	18.396	297.415	8.07765	1.14391	2.2774
1350	O=C(C1=CC=C(OC2=CC=C(P(C3=CC=C(O)C=C3)(C4=CC=CC=C4)=O)C=C2)C(S(=O)(O)=O)=C1)C5=CC(S(=O)(O)=O)=CC=C5	OC1=C(F)C(F)=C(C2=C(F)C(F)=C(OC3=CC=C(C(C(F)(F)F)(C(F)(F)F)C4=CC=CC=C4)C=C3)C(F)=C2F)C(F)=C1F	0.8	18.7044	346.837	8.214	1.20183	2.27713
1295	OC1=CC=C(C(C(F)(F)F)(C(F)(F)F)C2=CC=C(OC3=C(C4=CC=C(S(=O)(O)=O)C=C4)C=C(S(C5=CC(C6=CC=C(S(=O)(O)=O)C=C6)=CC(C7=CC=C(S(=O)(O)=O)C=C7)=C5)(=O)=O)C=C3C8=CC=C(S(=O)(O)=O)C=C8)C=C2)C=C1	OC(C=C1)=CC=C1C(C(F)(F)F)(C(F)(F)F)C(C=C2)=CC=C2OC(C=C3)=CC=C3C4=NC5=CC(C(C6=CC(N=C(C7=CC=CC=C7)O8)=C8C=C6)(C(F)(F)F)C(F)(F)F)=CC=C5O4	0.8	19.4806	277.48	8.55532	1.00326	2.27702
111	OC1=C(S(=O)(O)=O)C=C(C=C(S(=O)(O)=O)C(OC2=CC=CC=C2C#N)=C3)C3=C1	OC1=C(OC2=CC=C(C(C3=CC(C(C4=CC=CC=C4)=O)=CC=C3)=O)C=C2)C=C5C(C6C=CC5C6)=C1	0.4	18.3416	294.621	8.05553	1.24115	2.2769
1230	O=C(C1=CC=C(OC2=CC=CC=C2)C=C1)C3=CC(C4=C(C=CC=C4)OCCCS(=O)(O)=O)=C(C=C3)OCCCS(=O)(O)=O	OC1=CC=C(OC2=CC=C(OC3=CC=C(S(C4=CC=CC=C4)(=O)=O)C=C3)C=C2)C=C1	0.8	18.4026	270.599	8.08592	1.35107	2.27588
2746	OC(C=C1)=CC=C1P(C(C=C2)=CC=C2OC(C(S(=O)(O)=O)=C3)=CC=C3C(C4=CC=CC(C(C5=CC=CC(S(=O)(O)=O)=C5)=O)=C4)=O)(C6=CC=CC=C6)=O	O=C(NC1=O)C2=CC=C3C4=C2C1=CC=C4C(N(C5=CC=C(C(C6=CC=CC=C67)(C8=CC=CC=C8)C9=C7C=CC=C9)C=C5)C3=O)=O	0.9	18.3748	282.481	8.08358	1.07979	2.2731
2710	OC(C=C1)=CC=C1P(C(C=C2)=CC=C2OC(C(S(=O)(O)=O)=C3)=CC=C3C(C4=CC=CC(C(C5=CC=CC(S(=O)(O)=O)=C5)=O)=C4)=O)(C6=CC=CC=C6)=O	O=P(C1=CC=C(OC2=CC=C(C(C(F)(F)F)(C(F)(F)F)C3=CC=C(O)C=C3)C=C2)C=C1)(C4=CC=CC=C4)C5=CC=CC=C5	0.9	17.9778	311.996	7.90986	1.1162	2.27284
1088	O=S(C1=CC=CC(S(=O)(O)=O)=C1)(C2=CC=C(OC3=CC=C(C4=CC=C(O)C=C4)C=C3)C(S(=O)(O)=O)=C2)=O	O=C(C1=CC=CC=C1)C2=CC=C(C(C3=CC=CC=C3)=O)C=C2	0.7	18.6041	335.801	8.18562	0.932363	2.27277
1258	CC(C)(C1=CC=C(O)C=C1)C(C=C2)=CC=C2OC(C(S(=O)(O)=O)=C3)=CC=C3S(C4=CC(S(=O)(O)=O)=CC=C4)(=O)=O	O=C(NC1=O)C2=C(C1=CC=C3)C3=C(C4=C(C=CC=C5C(N(C6=CC=C(OC7=CC=CC=C7)C=C6)C8=O)=O)C5=C8C=C4)C=C2	0.8	17.6159	292.9	7.75108	0.590135	2.2727
2511	O=C(C1=CC=C(OC2=CC=C(P(C3=CC=C(O)C=C3)(C4=CC=CC=C4)=O)C=C2)C(S(=O)(O)=O)=C1)C5=CC(S(=O)(O)=O)=CC=C5	O=C(N1)C2=C(C=CC(OC3=CC=C(C(C)(C)C4=CC=C(OC5=CC=C(C(N(C6=CC=C(OC7=C(C(F)(F)F)C=C(C8=CC=C(C9=CC=C(C%10=CC=C(OC%11=CC=CC=C%11)C(C(F)(F)F)=C%10)C=C9)C=C8)C=C7)C=C6)C%12=O)=O)C%12=C5)C=C4)C=C3)=C2)C1=O	0.9	18.4873	279.901	8.14005	1.41268	2.27115
2682	OC(C=C1)=CC=C1P(C(C=C2)=CC=C2OC(C(S(=O)(O)=O)=C3)=CC=C3C(C4=CC=CC(C(C5=CC=CC(S(=O)(O)=O)=C5)=O)=C4)=O)(C6=CC=CC=C6)=O	OC1=CC=C(C(C(F)(F)F)(C(F)(F)F)C2=CC=C(OC3=CC=C(S(C4=CC=CC=C4)(=O)=O)C=C3)C=C2)C=C1	0.9	18.2794	304.039	8.0496	1.11463	2.27085
1414	O=C(C1=CC=C(OC2=CC=C(P(C3=CC=C(O)C=C3)(C4=CC=CC=C4)=O)C=C2)C(S(=O)(O)=O)=C1)C5=CC(S(=O)(O)=O)=CC=C5	OC1=CC=C(S(C2=CC=C(OC3=CC=C(C4=CC=CC=C4)C=C3)C=C2)(=O)=O)C=C1	0.8	18.564	356.425	8.17697	0.979193	2.27028
2766	OC(C=C1)=CC=C1P(C(C=C2)=CC=C2OC(C(S(=O)(O)=O)=C3)=CC=C3C(C4=CC=CC(C(C5=CC=CC(S(=O)(O)=O)=C5)=O)=C4)=O)(C6=CC=CC=C6)=O	O=C(C1=CC=C(OC2=CC=C(C(C)(C3=CC=CC(C(C)(C)C4=CC=C(O)C=C4)=C3)C)C=C2)C=C1)C5=CC=CC=C5	0.9	18.1783	297.983	8.00831	1.10564	2.26994
2681	OC(C=C1)=CC=C1P(C(C=C2)=CC=C2OC(C(S(=O)(O)=O)=C3)=CC=C3C(C4=CC=CC(C(C5=CC=CC(S(=O)(O)=O)=C5)=O)=C4)=O)(C6=CC=CC=C6)=O	O=S(C1=CC=CC=C1C2=NC3=CC=C(C4=CC=C(N=CN5)C5=C4)C=C3N2)(C6=CC=CC=C6)=O	0.9	18.2304	272.348	8.03226	1.03141	2.26965
1063	O=S(C1=CC=CC(S(=O)(O)=O)=C1)(C2=CC=C(OC3=CC=C(O)C(C4=CC=CC=C4)=C3)C(S(=O)(O)=O)=C2)=O	O=C(C1=CC=C(OC2=C(C=CC=C3C(N(C4=CC=CC=C4C)C5=O)=O)C3=C5C=C2)C=C1)C6=CC=CC=C6	0.7	18.0203	298.879	7.93982	1.00975	2.26961
1123	OC1=CC=C(S(C2=C(OC3=CC=C(C(C4=CC(S(=O)(O)=O)=CC=C4)=O)C=C3S(=O)(O)=O)C=C(OC5=CC=CC=C5)C=C2)(=O)=O)C=C1	O=C(C1=CC(C2=C(OC)C=CC=C2)=C(OC)C=C1)C(C=C3)=CC=C3OC4=CC=C(C(O)=O)C=C4	0.7	18.335	308.569	8.08184	1.1582	2.26867
2697	OC(C=C1)=CC=C1P(C(C=C2)=CC=C2OC(C(S(=O)(O)=O)=C3)=CC=C3C(C4=CC=CC(C(C5=CC=CC(S(=O)(O)=O)=C5)=O)=C4)=O)(C6=CC=CC=C6)=O	OC1=C(F)C(F)=C(C2=C(F)C(F)=C(OC3=CC=C(C(C(F)(F)F)(C(F)(F)F)C4=CC=CC=C4)C=C3)C(F)=C2F)C(F)=C1F	0.9	17.8149	295.774	7.85459	1.16419	2.26808
1225	O=C(C1=CC=C(OC2=CC=CC=C2)C=C1)C3=CC(C4=C(C=CC=C4)OCCCS(=O)(O)=O)=C(C=C3)OCCCS(=O)(O)=O	O=S(C(C=C1)=CC=C1OC(C=C2)=CC=C2C3=CC=C(O)C=C3)(C4=CC=CC=C4)=O	0.8	17.9531	268.302	7.92099	1.26157	2.26652
1948	OC1=CC2=C(C=C(S(=O)(O)=O)C=C2OC3=CC=CC=C3C#N)C=C1	CCCCCCN(C1=O)C(C2=CC=CC(C2=C1C=C3)=C3C4=C5C(C6=CC=C5)=C(C(NC6=O)=O)C=C4)=O	0.8	17.9419	269.635	7.91688	1.27494	2.26628
2699	OC(C=C1)=CC=C1P(C(C=C2)=CC=C2OC(C(S(=O)(O)=O)=C3)=CC=C3C(C4=CC=CC(C(C5=CC=CC(S(=O)(O)=O)=C5)=O)=C4)=O)(C6=CC=CC=C6)=O	CC(C)(C1=CC=C(OC2=CC=C(S(C3=CC=CC=C3)(=O)=O)C=C2)C=C1)C4=CC=C(O)C=C4	0.9	18.23	305.693	8.04802	1.06405	2.26515
3280	OC1=CC=CC(OC2=CC=C(C=CC=C3)C3=C2)=C1C(C4=C(S(=O)(O)=O)C=CC=C4)=O	O=S(C1=CC=CC=C1)(C2=CC=C(C=C2)OC3=CC=C(C=C3)C(C4=CC=CC=C4)(C5=CC=CC=C5)C6=CC=C(C=C6)O)=O	0.9	17.8194	310.964	7.86709	1.15419	2.26506
2799	O=S(C1=CC=CC=C1)(C2=CC=C(OC3=CC(C4=CC=CC(OC5=CC=C(C(C6=CC(S(=O)(O)=O)=C(F)C=C6)=O)C=C5S(=O)(O)=O)=C4)=C(O)C=C3)C=C2)=O	O=C(C1=CC=CC(C=O)=C1)NC(C=C2)=CC=C2OC3=C(C#N)C(OC4=CC=C(N)C=C4)=CC=C3	0.9	17.5388	306.146	7.7482	0.754876	2.26359
3745	O=S(C1=CC(S(=O)(O)=O)=CC=C1)(C2=CC=C(OC3=CC=C(C4(NC(C5=C4C=CC=C5)=O)C6=CC=C(O)C=C6)C=C3)C(S(=O)(O)=O)=C2)=O	OC(C=C1)=CC=C1C2=CC=C(OC3=CC(N=C4C5=CC=CC=C5)=C(C=C3)N=C4C6=CC=C(OC7=NC8=C(N=C7C9=CC=CC=C9)C=CC=C8)C=C6)C=C2	0.9	17.5683	268.537	7.76363	0.675631	2.26289
2574	O=C(C1=CC=C(OC2=CC=C(P(C3=CC=C(O)C=C3)(C4=CC=CC=C4)=O)C=C2)C(S(=O)(O)=O)=C1)C5=CC(S(=O)(O)=O)=CC=C5	O=C(N1)C2=C(C(C1=O)=CC=C3C4=O)C3=C(C(N4C5=CC=C(OC6=CC=C(C7=CC=C(OC8=CC=CC=C8)C=C7)C=C6)C=C5)=O)C=C2	0.9	19.4516	336.041	8.59731	1.05221	2.26252
1312	O=C(C1=CC=C(OC2=CC=C(P(C3=CC=C(O)C=C3)(C4=CC=CC=C4)=O)C=C2)C(S(=O)(O)=O)=C1)C5=CC(S(=O)(O)=O)=CC=C5	O=S(C1=CC=CC=C1)(C2=CC=C(OC3=CC=C(O)C(C4=CC(F)=C(F)C=C4)=C3)C=C2)=O	0.8	18.6141	326.019	8.22746	0.99143	2.26243
1427	O=C(C1=CC=C(OC2=CC=C(P(C3=CC=C(O)C=C3)(C4=CC=CC=C4)=O)C=C2)C(S(=O)(O)=O)=C1)C5=CC(S(=O)(O)=O)=CC=C5	O=C(C1=CC(C(C2=CC=CC=C2)=O)=CC=C1)C(C=C3)=CC=C3OC4=CC=C(O)C=C4	0.8	18.7536	353.039	8.28959	1.0522	2.26231
2600	O=C(C1=CC=C(OC2=CC=C(P(C3=CC=C(O)C=C3)(C4=CC=CC=C4)=O)C=C2)C(S(=O)(O)=O)=C1)C5=CC(S(=O)(O)=O)=CC=C5	O=C(C1=CC=CC(C=O)=C1)NC(C=C2)=CC=C2OC3=C(C#N)C(OC4=CC=C(N)C=C4)=CC=C3	0.9	19.7556	335.691	8.7346	1.08726	2.26177
2702	OC(C=C1)=CC=C1P(C(C=C2)=CC=C2OC(C(S(=O)(O)=O)=C3)=CC=C3C(C4=CC=CC(C(C5=CC=CC(S(=O)(O)=O)=C5)=O)=C4)=O)(C6=CC=CC=C6)=O	O=C(C1=CC=CC=C1)C(C=C2)=CC=C2OC(C(C)=C3)=C(C)C=C3C4=CC(C)=C(O)C(C)=C4	0.9	18.2624	301.686	8.07519	1.11089	2.26155
1410	O=C(C1=CC=C(OC2=CC=C(P(C3=CC=C(O)C=C3)(C4=CC=CC=C4)=O)C=C2)C(S(=O)(O)=O)=C1)C5=CC(S(=O)(O)=O)=CC=C5	OC1=CC=C(C(C2=CC=C(OC3=CC=C(C(C4=CC=CC=C4)=O)C=C3)C=C2)=O)C=C1	0.8	18.8824	353.837	8.35096	1.05019	2.26111
3298	OC1=CC=CC(OC2=CC=C(C=CC=C3)C3=C2)=C1C(C4=C(S(=O)(O)=O)C=CC=C4)=O	NC1=CC=C(C2(C3=CC=C(NC(CCCCCCC=O)=O)C=C3)C4=CC=CC=C4C5=C2C=CC=C5)C=C1	0.9	19.4358	312.9	8.59594	1.18546	2.26104
1400	O=C(C1=CC=C(OC2=CC=C(P(C3=CC=C(O)C=C3)(C4=CC=CC=C4)=O)C=C2)C(S(=O)(O)=O)=C1)C5=CC(S(=O)(O)=O)=CC=C5	O=S(C1=CC=CC=C1)(C2=CC=C(OC3=CC=C(O)C(C4=CC=C(F)C=C4)=C3)C=C2)=O	0.8	18.427	351.514	8.15479	1.03497	2.25966
1238	O=C(C1=CC=C(OC2=CC=CC=C2)C=C1)C3=CC(C4=C(C=CC=C4)OCCCS(=O)(O)=O)=C(C=C3)OCCCS(=O)(O)=O	OC(C=C1)=CC=C1C(C)(C)C(C=C2)=CC=C2OC3=CC=C(C(C4=CC=CC=C4)=O)C=C3	0.8	19.1508	266.614	8.47712	1.24624	2.25912
1921	OC1=CC=C(S(C2=C(OC3=CC=C(C(C4=CC(S(=O)(O)=O)=CC=C4)=O)C=C3S(=O)(O)=O)C=C(OC5=CC=CC=C5)C=C2)(=O)=O)C=C1	O=C(C1=C2C(C=CC=C23)=CC=C1)N(C4=CC=CC(C(C5=CC=CC=C5)=O)=C4)C3=O	0.8	17.6877	291.386	7.83008	0.75986	2.25895
2660	O=C(C1=CC=C(OC2=CC=C(P(C3=CC=C(O)C=C3)(C4=CC=CC=C4)=O)C=C2)C(S(=O)(O)=O)=C1)C5=CC(S(=O)(O)=O)=CC=C5	CCCCCCN(C1=O)C(C2=CC=CC(C2=C1C=C3)=C3C4=C5C(C6=CC=C5)=C(C(NC6=O)=O)C=C4)=O	0.9	19.9527	324.162	8.83288	1.04112	2.25891
1830	O=S(C1=CC=CC(S(=O)(O)=O)=C1)(C2=CC=C(OC3=CC=C(O)C(C4=CC=CC=C4)=C3)C(S(=O)(O)=O)=C2)=O	O=C(C1=CC=CC2=C1C3=CC=C2)N(NC4=CC=C(CC5=CC=C(NN(C6=O)C(C7=C(C6=CC=C8)C8=CC=C7)=O)C=C5)C=C4)C3=O	0.8	17.7711	271.474	7.86938	0.6782	2.25826
2690	OC(C=C1)=CC=C1P(C(C=C2)=CC=C2OC(C(S(=O)(O)=O)=C3)=CC=C3C(C4=CC=CC(C(C5=CC=CC(S(=O)(O)=O)=C5)=O)=C4)=O)(C6=CC=CC=C6)=O	O=S(C1=CC=CC=C1)(C2=CC=C(C=C2)OC3=CC=C(C=C3)C(C4=CC=CC=C4)(C5=CC=CC=C5)C6=CC=C(C=C6)O)=O	0.9	17.8619	306.908	7.90957	1.03048	2.25826
2712	OC(C=C1)=CC=C1P(C(C=C2)=CC=C2OC(C(S(=O)(O)=O)=C3)=CC=C3C(C4=CC=CC(C(C5=CC=CC(S(=O)(O)=O)=C5)=O)=C4)=O)(C6=CC=CC=C6)=O	O=S(C1=CC=CC=C1)(C2=CC=C(OC3=CC=C(S(=O)(C4=CC=CC=C4)=O)C=C3)C=C2)=O	0.9	17.5033	300.468	7.75434	1.03604	2.25722
2555	O=C(C1=CC=C(OC2=CC=C(P(C3=CC=C(O)C=C3)(C4=CC=CC=C4)=O)C=C2)C(S(=O)(O)=O)=C1)C5=CC(S(=O)(O)=O)=CC=C5	O=C(C1=CC=C(SC2=CC=C(C(N3C4=CC=C(OC5=CC=CC=C5)C=C4)=O)C6=C2C=CC=C6C3=O)C=C1)C7=CC=C(SC8=CC=C(C(N9)=O)C%10=C8C=CC=C%10C9=O)C=C7	0.9	18.5698	331.662	8.22762	1.32731	2.25701
1480	O=C(C1=CC(S(=O)(O)=O)=CC=C1)C(C=C2S(=O)(O)=O)=CC=C2OC(C(C)=C3)=C(C)C=C3C4=CC(C)=C(O)C(C)=C4	O=S(C1=C(C2=NC3=C(C=C(N=CS4)C4=C3)S2)C=CC=C1)(C5=CC=CC=C5)=O	0.8	17.8834	306.849	7.92527	1.20073	2.2565
1361	O=C(C1=CC=C(OC2=CC=C(P(C3=CC=C(O)C=C3)(C4=CC=CC=C4)=O)C=C2)C(S(=O)(O)=O)=C1)C5=CC(S(=O)(O)=O)=CC=C5	O=C(C1=CC=C(C(C2=CC=C(O)C=C2)=O)C=C1)C3=CC=C(OC4=CC=C(C=C4)C(C(F)(F)F)(C(F)(F)F)C5=CC=CC=C5)C=C3	0.8	18.8957	300.983	8.37389	1.06612	2.2565
398	O=C(C1=CC=C(OC2=CC=CC=C2)C=C1)C3=CC(C4=C(C=CC=C4)OCCCS(=O)(O)=O)=C(C=C3)OCCCS(=O)(O)=O	O=S(C1=CC=C(O)C=C1)(C2=CC=C(OC3=CC=CC=C3)C=C2)=O	0.6	17.5672	291.711	7.78559	1.25695	2.25638
747	O=C(C1=CC=C(OC2=CC=CC=C2)C=C1)C3=CC(C4=C(C=CC=C4)OCCCS(=O)(O)=O)=C(C=C3)OCCCS(=O)(O)=O	O=S(C1=CC=C(O)C=C1)(C2=CC=C(OC3=CC=CC=C3)C=C2)=O	0.7	18.3135	284.271	8.11747	1.30009	2.25606
1848	O=S(C1=CC=CC(S(=O)(O)=O)=C1)(C2=CC=C(OC3=CC=C(C4=CC=C(O)C=C4)C=C3)C(S(=O)(O)=O)=C2)=O	O=C(C1=CC=CC2=C1C3=CC=C2)N(NC4=CC=C(CC5=CC=C(NN(C6=O)C(C7=C(C6=CC=C8)C8=CC=C7)=O)C(C)=C5)C=C4C)C3=O	0.8	17.5571	273.147	7.7825	0.641099	2.25597
2798	O=S(C1=CC=CC=C1)(C2=CC=C(OC3=CC(C4=CC=CC(OC5=CC=C(C(C6=CC(S(=O)(O)=O)=C(F)C=C6)=O)C=C5S(=O)(O)=O)=C4)=C(O)C=C3)C=C2)=O	O=C(C1=CC(C2=C(OC)C=CC=C2)=C(OC)C=C1)C(C=C3)=CC=C3OC4=CC=C(C(O)=O)C=C4	0.9	17.522	308.998	7.76699	0.775865	2.25596
840	O=C(C1=CC(S(=O)(O)=O)=CC=C1)C(C=C2S(=O)(O)=O)=CC=C2OC(C(C)=C3)=C(C)C=C3C4=CC(C)=C(O)C(C)=C4	O=S(C1=CC=CC=C1)(C2=CC=C(OC3=CC=C(S(=O)(C4=CC=CC=C4)=O)C=C3)C=C2)=O	0.7	17.6026	311.456	7.8052	1.12927	2.25524
476	O=S(C1=CC=CC(S(=O)(O)=O)=C1)(C2=CC=C(OC3=CC=C(O)C(C(C)(C)C)=C3)C(S(=O)(O)=O)=C2)=O	O=C(C1=CC=CC=C1)C2=CC=C(C(C3=CC=CC=C3)=O)C=C2	0.6	18.8855	290.363	8.37473	1.02731	2.25506
2575	O=C(C1=CC=C(OC2=CC=C(P(C3=CC=C(O)C=C3)(C4=CC=CC=C4)=O)C=C2)C(S(=O)(O)=O)=C1)C5=CC(S(=O)(O)=O)=CC=C5	O=C(N1)C2=C(C(C1=O)=CC=C3)C3=C(C4=C(C=CC=C5C6=O)C5=C(C(N6C7=CC=C(OC8=CC=C(C9=CC=C(OC%10=C(C(F)(F)F)C=CC=C%10)C=C9)C=C8)C(C(F)(F)F)=C7)=O)C=C4)C=C2	0.9	18.4198	308.581	8.17359	1.41907	2.25358
2680	OC(C=C1)=CC=C1P(C(C=C2)=CC=C2OC(C(S(=O)(O)=O)=C3)=CC=C3C(C4=CC=CC(C(C5=CC=CC(S(=O)(O)=O)=C5)=O)=C4)=O)(C6=CC=CC=C6)=O	O=S(C(C=C1)=CC=C1C2=NC3=CC=C(C4=CC=C(NC=N5)C5=C4)C=C3N2)(C6=CC=CC=C6)=O	0.9	18.0789	272.093	8.02759	1.03185	2.2521
739	O=C(C1=CC=C(OC2=CC=CC=C2)C=C1)C3=CC(C4=C(C=CC=C4)OCCCS(=O)(O)=O)=C(C=C3)OCCCS(=O)(O)=O	O=S(C1=CC=CC=C1)(C2=CC=C(OC3=CC=C(O)C=C3)C=C2)=O	0.7	17.5856	286.917	7.8101	1.30057	2.25165
2641	O=C(C1=CC=C(OC2=CC=C(P(C3=CC=C(O)C=C3)(C4=CC=CC=C4)=O)C=C2)C(S(=O)(O)=O)=C1)C5=CC(S(=O)(O)=O)=CC=C5	O=C(N(C1=CC=CC=C1)C2=O)C(C2=C(C3=CC=C(O)C=C3)C4=C5C=CC=C4)=C5C(C=C6)=CC=C6OC7=CC=C(C(C=C8)=CC=C8C(C=C9)=CC=C9C%10=CC(C(F)(F)F)=CC=C%10)C=C7C(F)(F)F	0.9	18.2775	339.389	8.11892	1.39612	2.25122
733	O=C(C1=CC=C(OC2=CC=CC=C2)C=C1)C3=CC(C4=C(C=CC=C4)OCCCS(=O)(O)=O)=C(C=C3)OCCCS(=O)(O)=O	O=C(C1=CC=C(OC2=CC=C(C(C3=CC=CC=C3C(O)=O)C4=CC=C(O)C=C4)C=C2)C=C1)C5=CC=CC=C5	0.7	17.9178	268.084	7.95957	1.28462	2.2511
2685	OC(C=C1)=CC=C1P(C(C=C2)=CC=C2OC(C(S(=O)(O)=O)=C3)=CC=C3C(C4=CC=CC(C(C5=CC=CC(S(=O)(O)=O)=C5)=O)=C4)=O)(C6=CC=CC=C6)=O	OC1=CC=C(C2(C3=CC=CC=C3C4=CC=CC=C42)C5=CC=C(OC6=CC=C(P(C7=CC=CC=C7)(C8=CC=CC=C8)=O)C=C6)C=C5)C=C1	0.9	17.5672	293.378	7.80517	1.08013	2.25071
159	OC1=C(S(=O)(O)=O)C=C(C(C2=CC=CC=C2C3=O)(N3C4=CC=CC=C4)C5=CC=C(OC6=CC=C(S(C7=CC(S(=O)(O)=O)=CC=C7)(=O)=O)C=C6S(=O)(O)=O)C(S(=O)(O)=O)=C5)C=C1	O=C(C1=CC(C2=C(OC)C=CC=C2)=C(OC)C=C1)C(C=C3)=CC=C3OC4=CC=C(C(O)=O)C=C4	0.4	17.5805	279.543	7.81156	1.11337	2.25058
2668	OC(C=C1)=CC=C1P(C(C=C2)=CC=C2OC(C(S(=O)(O)=O)=C3)=CC=C3C(C4=CC=CC(C(C5=CC=CC(S(=O)(O)=O)=C5)=O)=C4)=O)(C6=CC=CC=C6)=O	O=C(C1=CC=C(F)C=C1)C(C=C2)=CC=C2OC(C=C3)=CC=C3C(C(F)(F)F)(C(F)(F)F)C4=CC=CC=C4	0.9	17.6284	301.854	7.83363	1.15239	2.25035
313	O=S(C1=CC=C(O)C(S(=O)(O)=O)=C1)(C2=CC(S(=O)(O)=O)=C(OC3=CC=C(C=C(O)C=C4)C4=C3)C=C2)=O	OC1=CC=C(C(C2=CC=C(OC3=CC=C(C(C4=CC=CC=C4)=O)C=C3)C=C2)=O)C=C1	0.5	19.1062	317.699	8.4937	1.17037	2.24946
3739	O=S(C1=CC(S(=O)(O)=O)=CC=C1)(C2=CC=C(OC3=CC=C(C4(NC(C5=C4C=CC=C5)=O)C6=CC=C(O)C=C6)C=C3)C(S(=O)(O)=O)=C2)=O	OC1=CC=C(OC2=CC=C(OC3=CC=C(S(C4=CC=CC=C4)(=O)=O)C=C3)C=C2)C=C1	0.9	17.9531	267.54	7.9813	0.670177	2.24939
3354	OC1=CC=CC(OC2=CC=C(C=CC=C3)C3=C2)=C1C(C4=C(S(=O)(O)=O)C=CC=C4)=O	O=S(C1=C(C=CC(OCC2=NN(C3=CC(S(=O)(O)=O)=C(/C=C/C4=CC=CC=C4S(=O)(O)=O)C=C3)N=C2)=C1)OCC5=CNN=N5)(O)=O	0.9	18.2618	305.961	8.11923	1.1875	2.24921
2601	O=C(C1=CC=C(OC2=CC=C(P(C3=CC=C(O)C=C3)(C4=CC=CC=C4)=O)C=C2)C(S(=O)(O)=O)=C1)C5=CC(S(=O)(O)=O)=CC=C5	O=C(C1=CC=CC=C1)C2=CC=C(C(C3=CC=CC=C3)=O)C=C2	0.9	19.6867	343.48	8.75325	0.988903	2.24907
1394	O=C(C1=CC=C(OC2=CC=C(P(C3=CC=C(O)C=C3)(C4=CC=CC=C4)=O)C=C2)C(S(=O)(O)=O)=C1)C5=CC(S(=O)(O)=O)=CC=C5	OC1=CC=CC(OC2=CC=C(C=CC=C3)C3=C2)=C1C#N	0.8	18.8198	342.96	8.36943	1.13006	2.24864
1968	O=C(C1=C2C=CC=C1)N(CCCS(=O)(O)=O)C2(C3=CC=C(O)C=C3)C(C=C4)=CC=C4OC5=CC=C(S(C6=CC=CC(S(=O)(O)=O)=C6)(=O)=O)C=C5S(=O)(O)=O	O=S(C(C=C1)=CC=C1C2=NC3=CC=C(C4=CC=C(NC=N5)C5=C4)C=C3N2)(C6=CC=CC=C6)=O	0.8	17.8159	267.971	7.92425	0.738787	2.24828
1340	O=C(C1=CC=C(OC2=CC=C(P(C3=CC=C(O)C=C3)(C4=CC=CC=C4)=O)C=C2)C(S(=O)(O)=O)=C1)C5=CC(S(=O)(O)=O)=CC=C5	FC(C(C1=CC=CC=C1)(C(F)(F)F)C2=CC=C(C3=NC4=C(N3)C=C(C5=CC=C(NC=N6)C6=C5)C=C4)C=C2)(F)F	0.8	18.7772	307.881	8.35236	1.13127	2.24814
2494	O=C(C1=CC=C(OC2=CC=C(P(C3=CC=C(O)C=C3)(C4=CC=CC=C4)=O)C=C2)C(S(=O)(O)=O)=C1)C5=CC(S(=O)(O)=O)=CC=C5	FC1=C(O)C(F)=C(F)C(C2=C(F)C(F)=C(OC3=CC=C(C4=CC=C(O)C=C4)C=C3)C(F)=C2F)=C1F	0.9	20.106	352.674	8.94367	0.992321	2.24807
2955	SC(C=C1)=CC=C1SC(C=C2)=CC=C2SC(C(S(=O)(O)=O)=C3)=CC=C3S(C4=CC(S(=O)(O)=O)=CC=C4)(=O)=O	SC1=CC(C=C2)=C(C=C1)C=C2SC3=C(C#N)C=CC=C3	0.9	18.2436	350.696	8.11795	1.12585	2.24732
2491	O=C(C1=CC=C(OC2=CC=C(P(C3=CC=C(O)C=C3)(C4=CC=CC=C4)=O)C=C2)C(S(=O)(O)=O)=C1)C5=CC(S(=O)(O)=O)=CC=C5	C=S(C(C=C1)=CC=C1OC2=CC3=CC=CC=C3C=C2)(C4=CC=C(OC5=CC=C(C=CC(O)=C6)C6=C5)C=C4)=C	0.9	19.5229	354.534	8.68787	1.01998	2.24714
2608	O=C(C1=CC=C(OC2=CC=C(P(C3=CC=C(O)C=C3)(C4=CC=CC=C4)=O)C=C2)C(S(=O)(O)=O)=C1)C5=CC(S(=O)(O)=O)=CC=C5	O=P(C1=CC=C(SC2=CC=C(C(C(F)(F)F)(C(F)(F)F)C3=CC=C(S)C=C3)C=C2)C=C1)(C4=CC=CC=C4)C5=CC=CC=C5	0.9	19.3976	354.05	8.63229	1.10597	2.24709
2497	O=C(C1=CC=C(OC2=CC=C(P(C3=CC=C(O)C=C3)(C4=CC=CC=C4)=O)C=C2)C(S(=O)(O)=O)=C1)C5=CC(S(=O)(O)=O)=CC=C5	O=S(C(C=C1)=CC=C1OC2=CC=C(C3=CC(C4=CC=CC=C4)=CC=C3)C=C2)(C5=CC=C(OC6=CC=C(C7=CC=CC(C8=CC=C(O)C=C8)=C7)C=C6)C=C5)=O	0.9	19.4284	361.097	8.64769	1.08812	2.24666
237	O=S(C1=CC(S(=O)(O)=O)=C(C2=NC3=C(C=C(N=CS4)C4=C3)S2)C=C1)(C5=CC=CC(S(=O)(O)=O)=C5)=O	O=C(C1=CC=CC=C1)C2=CC=C(C(C3=CC=CC=C3)=O)C=C2	0.5	18.3059	267.444	8.14968	1.31285	2.24622
2570	O=C(C1=CC=C(OC2=CC=C(P(C3=CC=C(O)C=C3)(C4=CC=CC=C4)=O)C=C2)C(S(=O)(O)=O)=C1)C5=CC(S(=O)(O)=O)=CC=C5	O=C(C1=CC(C2=C(OC)C=CC=C2)=C(OC)C=C1)C(C=C3)=CC=C3OC4=CC=C(C(O)=O)C=C4	0.9	19.9757	339.302	8.89363	1.07907	2.24607
1078	O=S(C1=CC=CC(S(=O)(O)=O)=C1)(C2=CC=C(OC3=CC=C(O)C=C3)C(S(=O)(O)=O)=C2)=O	O=C(C1=C2C(C=CC=C23)=CC=C1)N(C4=CC=CC(C(C5=CC=CC=C5)=O)=C4)C3=O	0.7	19.1611	272.99	8.53117	0.769164	2.24601
855	O=C(C1=CC=C(OC2=CC=C(C(C3=CC=CC=C3C(O)=O)C4=CC=C(O)C=C4)C=C2)C(S(=O)(O)=O)=C1)C5=CC(S(=O)(O)=O)=CC=C5	OC1=CC=C(C2=CC=C(OC3=CC=C(S(=O)(C4=CC=C(OC5=CC=C(C6=CC=C(O)C=C6)C=C5)C=C4)=O)C=C3)C=C2)C=C1	0.7	17.7925	279.912	7.92191	1.2779	2.24598
287	OC1=C(S(=O)(O)=O)C=C(C=C(S(=O)(O)=O)C(OC2=CC=CC=C2C#N)=C3)C3=C1	O=C(C1=CC=C(C(C2=CC=C(OC3=CC=C(O)C(C(C)(C)C)=C3)C=C2)=O)C=C1)C4=CC=CC=C4	0.5	20.0351	301.481	8.93214	1.24823	2.24303
1234	O=C(C1=CC=C(OC2=CC=CC=C2)C=C1)C3=CC(C4=C(C=CC=C4)OCCCS(=O)(O)=O)=C(C=C3)OCCCS(=O)(O)=O	O=C(C1=CC=CC=C1)C(C=C2)=CC=C2OC(C(C)=C3)=C(C)C=C3C4=CC(C)=C(O)C(C)=C4	0.8	18.9551	281.022	8.45102	1.19602	2.24294
2514	O=C(C1=CC=C(OC2=CC=C(P(C3=CC=C(O)C=C3)(C4=CC=CC=C4)=O)C=C2)C(S(=O)(O)=O)=C1)C5=CC(S(=O)(O)=O)=CC=C5	O=S(C(C=C1)=CC=C1C2=NC3=CC=C(C4=CC=C(NC=N5)C5=C4)C=C3N2)(C6=CC=CC=C6)=O	0.9	19.6314	336.22	8.75347	0.965616	2.2427
1706	O=C(NC1=O)C2=CC=C3C4=C2C1=CC=C4C(N(C5=CC=C(OC6=CC(C=C(OC7=CC=CC=C7)C(S(=O)(O)=O)=C8)=C8C=C6S(=O)(O)=O)C=C5)C3=O)=O	O=S(C1=CC=CC=C1)(C2=CC=C(OC3=CC=C(C(C4=CC=C(OC5=CC=C(S(C6=CC=CC=C6)(=O)=O)C=C5)C=C4)=O)C=C3)C=C2)=O	0.8	17.5453	298.186	7.82435	1.13242	2.24239
2602	O=C(C1=CC=C(OC2=CC=C(P(C3=CC=C(O)C=C3)(C4=CC=CC=C4)=O)C=C2)C(S(=O)(O)=O)=C1)C5=CC(S(=O)(O)=O)=CC=C5	OC(C=C1)=CC=C1C2(C3=CC=C(OC4=CC=CC=C4C#N)C=C3)C5=C(C=CC=C5)C6=CC=CC=C26	0.9	19.5362	346.044	8.71307	1.03628	2.24218
2686	OC(C=C1)=CC=C1P(C(C=C2)=CC=C2OC(C(S(=O)(O)=O)=C3)=CC=C3C(C4=CC=CC(C(C5=CC=CC(S(=O)(O)=O)=C5)=O)=C4)=O)(C6=CC=CC=C6)=O	O=C(C1=C(C2=CC=C3C4=NC5=C(N46)C=C(OC7=CC=C(C8=CC=C(O)C=C8)C=C7)C=C5)C3=C(C6=O)C=C1)N9C2=NC%10=C9C=CC=C%10	0.9	18.1801	269.066	8.11125	1.121	2.24134
2657	O=C(C1=CC=C(OC2=CC=C(P(C3=CC=C(O)C=C3)(C4=CC=CC=C4)=O)C=C2)C(S(=O)(O)=O)=C1)C5=CC(S(=O)(O)=O)=CC=C5	O=C(C1=CC=C(C2=CC=C(OC3=CC=CC=C3)C=C2)C=C1)C4=CC=CC=C4	0.9	19.5783	348.792	8.73521	0.994036	2.24131
1141	O=S(C1=CC=C(O)C(S(=O)(O)=O)=C1)(C2=CC(S(=O)(O)=O)=C(OC3=CC=C(C(C(F)(F)F)(C(F)(F)F)C4=CC=C(O)C=C4)C=C3)C=C2)=O	OC(C=C1)=CC=C1C(C(F)(F)F)(C(F)(F)F)C(C=C2)=CC=C2OC(C=C3)=CC=C3C4=NC5=CC(C(C6=CC(N=C(C7=CC=CC=C7)O8)=C8C=C6)(C(F)(F)F)C(F)(F)F)=CC=C5O4	0.7	19.1586	323.97	8.54886	1.30078	2.24107
1447	O=C(C1=CC=C(OC2=CC=C(P(C3=CC=C(O)C=C3)(C4=CC=CC=C4)=O)C=C2)C(S(=O)(O)=O)=C1)C5=CC(S(=O)(O)=O)=CC=C5	OC1=CC=C(C(C2=C(C(O)=O)C=CC=C2)C3=CC=C(OC4=CC=CC=C4C#N)C=C3)C=C1	0.8	19.0679	345.52	8.5094	1.14061	2.24081
2444	OC1=CC=C(C(C(F)(F)F)(C(F)(F)F)C2=CC=C(OC3=C(C4=CC=C(S(=O)(O)=O)C=C4)C=C(S(C5=CC(C6=CC=C(S(=O)(O)=O)C=C6)=CC(C7=CC=C(S(=O)(O)=O)C=C7)=C5)(=O)=O)C=C3C8=CC=C(S(=O)(O)=O)C=C8)C=C2)C=C1	OC(C=C1)=CC=C1C(C(F)(F)F)(C(F)(F)F)C(C=C2)=CC=C2OC(C=C3)=CC=C3C4=NC5=CC(C(C6=CC(N=C(C7=CC=CC=C7)O8)=C8C=C6)(C(F)(F)F)C(F)(F)F)=CC=C5O4	0.9	20.1771	284.38	9.0128	1.0096	2.23871
2534	O=C(C1=CC=C(OC2=CC=C(P(C3=CC=C(O)C=C3)(C4=CC=CC=C4)=O)C=C2)C(S(=O)(O)=O)=C1)C5=CC(S(=O)(O)=O)=CC=C5	O=C(C1=C2C(C3=CC=C24)=C(C(NC3=O)=O)C=C1)N(C5=CC=C(C6=NC(C7=CC=CC=C7)=NN6)C=C5)C4=O	0.9	19.9474	314.542	8.91052	1.01384	2.23863
2662	OC(C=C1)=CC=C1P(C(C=C2)=CC=C2OC(C(S(=O)(O)=O)=C3)=CC=C3C(C4=CC=CC(C(C5=CC=CC(S(=O)(O)=O)=C5)=O)=C4)=O)(C6=CC=CC=C6)=O	O=S(C1=CC=C(O)C=C1)(C2=CC=C(OC3=CC=C(C(C(F)(F)F)(C(F)(F)F)C4=CC=CC=C4)C=C3)C=C2)=O	0.9	18.1146	302.025	8.09458	1.11518	2.23787
2744	OC(C=C1)=CC=C1P(C(C=C2)=CC=C2OC(C(S(=O)(O)=O)=C3)=CC=C3C(C4=CC=CC(C(C5=CC=CC(S(=O)(O)=O)=C5)=O)=C4)=O)(C6=CC=CC=C6)=O	O=P(C1=CC=C(SC2=CC=C(C(C(F)(F)F)(C(F)(F)F)C3=CC=C(S)C=C3)C=C2)C=C1)(C4=CC=CC=C4)C5=CC=CC=C5	0.9	17.516	305.986	7.83058	1.15749	2.23687
2629	O=C(C1=CC=C(OC2=CC=C(P(C3=CC=C(O)C=C3)(C4=CC=CC=C4)=O)C=C2)C(S(=O)(O)=O)=C1)C5=CC(S(=O)(O)=O)=CC=C5	OC(C=C1)=CC=C1C(C(F)(F)F)(C(F)(F)F)C(C=C2)=CC=C2OC3=NC4=CC(C(C(F)(F)F)(C(F)(F)F)C5=CC6=C(C=C5)OC(C7=CC=CC=C7)=N6)=CC=C4O3	0.9	19.7178	334.128	8.81757	1.14775	2.23619
49	FC1=CC=C(C=C1S(=O)(O)=O)S(C2=CC=C(C(S(=O)(O)=O)=C2)OC3=C(C=C(C=C3)C(C4=CC(S(=O)(O)=O)=C(C=C4)OC5=CC=C(C=C5S(=O)(O)=O)S(C6=CC=C(C(S(=O)(O)=O)=C6)F)(=O)=O)=O)S(=O)(O)=O)(=O)=O	O=C(C1=CC=C(OC2=CC=C(P(C3=CC=C(O)C=C3)(C4=CC=CC=C4)=O)C=C2)C=C1)C5=CC=CC=C5	0.4	17.8571	339.56	7.98723	0.80818	2.23571
1068	O=S(C1=CC=CC(S(=O)(O)=O)=C1)(C2=CC=C(OC3=CC=C(O)C(C4=CC=CC=C4)=C3)C(S(=O)(O)=O)=C2)=O	O=C(C1=CC(C(C2=CC=CC=C2)=O)=CC=C1)C(C=C3)=CC=C3OC4=CC=C(O)C=C4	0.7	17.9375	342.938	8.02705	0.94253	2.23464
2317	OC1=CC=C(C(C(F)(F)F)(C(F)(F)F)C2=CC=C(OC3=CC=C(S(C4=CC=CC(C5=CC=C(S(=O)(O)=O)C=C5)=C4)(=O)=O)C=C3C6=CC=C(S(=O)(O)=O)C=C6)C=C2)C=C1	OC(C=C1)=CC=C1C(C(F)(F)F)(C(F)(F)F)C(C=C2)=CC=C2OC(C=C3)=CC=C3C4=NC5=CC(C(C6=CC(N=C(C7=CC=CC=C7)O8)=C8C=C6)(C(F)(F)F)C(F)(F)F)=CC=C5O4	0.9	20.5375	294.454	9.19246	0.937729	2.23416
2666	OC(C=C1)=CC=C1P(C(C=C2)=CC=C2OC(C(S(=O)(O)=O)=C3)=CC=C3C(C4=CC=CC(C(C5=CC=CC(S(=O)(O)=O)=C5)=O)=C4)=O)(C6=CC=CC=C6)=O	O=C(C1=CC=C(OC2=CC=C(C(C)(C)C3=CC=CC=C3)C=C2)C=C1)C(C=C4)=CC=C4OC5=CC=C(C(C)(C)C6=CC=C(O)C=C6)C=C5	0.9	17.9716	297.783	8.04777	1.15343	2.23312
2719	OC(C=C1)=CC=C1P(C(C=C2)=CC=C2OC(C(S(=O)(O)=O)=C3)=CC=C3C(C4=CC=CC(C(C5=CC=CC(S(=O)(O)=O)=C5)=O)=C4)=O)(C6=CC=CC=C6)=O	O=C(N1)C2=C(C(C1=O)=CC=C3C4=O)C3=C(C(N4C5=CC=C(OC6=CC=C(C7=CC=C(OC8=CC=CC=C8)C=C7)C=C6)C=C5)=O)C=C2	0.9	18.2808	301.478	8.18673	1.12957	2.23298
1167	OC1=CC=C(OC2=CC=CC(OC3=CC=C(OC4=CC=C(S(C5=CC=CC=C5)(=O)=O)C=C4)C(S(=O)(O)=O)=C3)=C2C(C6=CC=C(C7=C(C8=CC=C(S(=O)(O)=O)C=C8)C(C9=CC=C(S(=O)(O)=O)C=C9)=C(C%10=CC=C(S(=O)(O)=O)C=C%10)C(C%11=CC=C(S(=O)(O)=O)C=C%11)=C7C%12=CC=C(S(=O)(O)=O)C=C%12)C=C6)=O)C(S(=O)(O)=O)=C1	O=S(C1=CC=CC=C1)(C2=CC=C(OC3=CC=C(C(C4=CC=C(OC5=CC=C(S(C6=CC=CC=C6)(=O)=O)C=C5)C=C4)=O)C=C3)C=C2)=O	0.7	18.2156	269.602	8.15811	0.882312	2.23283
856	O=C(C1=CC=C(OC2=CC=C(C(C3=CC=CC=C3C(O)=O)C4=CC=C(O)C=C4)C=C2)C(S(=O)(O)=O)=C1)C5=CC(S(=O)(O)=O)=CC=C5	O=C(C1=CC=C(OC2=CC=C(P(C3=CC=C(O)C=C3)(C4=CC=CC=C4)=O)C=C2)C=C1)C5=CC=CC=C5	0.7	20.6924	305.541	9.26911	1.13972	2.2324
694	C=C(C1=CC=C(C(S(=O)(O)=O)=C1)F)C2=CC=C(C(S(=O)(O)=O)=C2)OC3=CC=C(C=C3)C4=CC=C(C=C4)OC5=CC=C(C=C5S(=O)(O)=O)C(C6=CC=C(C(S(=O)(O)=O)=C6)F)=C	OC(C=C1)=CC=C1P(C(C=C2)=CC=C2OC(C=C3)=CC=C3C(C4=CC=CC(C(C5=CC=CC=C5)=O)=C4)=O)(C6=CC=CC=C6)=O	0.7	17.6583	309.654	7.91281	0.912672	2.23161
356	C=C(C1=CC=C(CCCOC2=C(S(=O)(O)=O)C=C(C(C3=CC=C(S(=O)(O)=O)C=C3)(C4=CC=C(S(=O)(O)=O)C=C4)C5=CC=C(S(=O)(O)=O)C=C5)C=C2)C=C1)C6=CC=CC=C6	OC(C=C1)=CC=C1P(C(C=C2)=CC=C2OC(C=C3)=CC=C3C(C4=CC=CC(C(C5=CC=CC=C5)=O)=C4)=O)(C6=CC=CC=C6)=O	0.6	17.7475	279.616	7.95301	0.823049	2.23155
1424	O=C(C1=CC=C(OC2=CC=C(P(C3=CC=C(O)C=C3)(C4=CC=CC=C4)=O)C=C2)C(S(=O)(O)=O)=C1)C5=CC(S(=O)(O)=O)=CC=C5	O=C(C1=CC=CC(C(C2=CC=C(OC3=CC=C(C(C)(C)C4=CC=C(O)C=C4)C=C3)C=C2)=O)=C1)C5=CC=CC=C5	0.8	18.9511	355.371	8.49532	1.10836	2.23077
1336	O=C(C1=CC=C(OC2=CC=C(P(C3=CC=C(O)C=C3)(C4=CC=CC=C4)=O)C=C2)C(S(=O)(O)=O)=C1)C5=CC(S(=O)(O)=O)=CC=C5	O=P(C1=CC=C(O)C=C1)(C2=CC=CC=C2)C(C=C3)=CC=C3OC(C=C4)=CC=C4S(C5=CC=CC=C5)(=O)=O	0.8	18.8961	366.248	8.47202	0.974866	2.23041
420	O=S(C1=CC=CC(S(=O)(O)=O)=C1)(C2=CC=C(OC3=CC=C(C=CC(O)=C4)C4=C3)C(S(=O)(O)=O)=C2)=O	OC1=CC=C(C(C2=CC=C(OC3=CC=C(C(C4=CC=CC=C4)=O)C=C3)C=C2)=O)C=C1	0.6	18.5966	329.481	8.34099	0.844823	2.22954
396	O=C(C1=CC=C(OC2=CC=CC=C2)C=C1)C3=CC(C4=C(C=CC=C4)OCCCS(=O)(O)=O)=C(C=C3)OCCCS(=O)(O)=O	OC1=CC=C(C(C(C=C2)=CC=C2OC(C=C3)=CC=C3C(CCC(O)=O)(C)C4=CC=CC=C4)=O)C=C1	0.6	18.3022	276.963	8.21114	1.20623	2.22895
[truncated: 1,288 more rows]
